# Supplementary material for: Identification and Genome-Wide Prediction of DNA Binding Specificities for the ApiAP2 Family of Regulators from the Malaria Parasite
Source: PLoS Pathog. 2010 Oct 28;6(10):e1001165. doi: 10.1371/journal.ppat.1001165 (PMC2965767; doi:10.1371/journal.ppat.1001165)
Supplement: Dataset S4 — Motif occurrence across the P. falciparum genome. (2.12 MB XLS) [file ppat.1001165.s022.xls]

## Sheet: Sheet1
Dataset S4. Motif occurrence across the P. falciparum genome.
All P. falciparum genes are listed in the first column.
The AP2 domain corresponding to the motifs in Figure 1 are the column headings in bold.
A gene entry under each AP2 domain indicates one or more motifs in the upstream region of that gene. Empty cells indicate the absence of the AP2 motif for that gene.
Searches were done using ScanACE with the position weight matrix trimmed to the 6 most informative consecutive motif positions. Upstream regions are 2kb or less if the adjacent open reading frame is within this region.
Gene ID	PF07_0126_DLD	PF14_0633	PF13_0267	PF14_0079	PF11_0404_D1	PF13_0097	PF13_0235_D1	PF10_0075_D1	PF10_0075_D2	PF10_0075_D3	PFL1075w	PFL1900w_DLD	PFE0840c_D2	PF14_0533	PFF0670w_D1	PFF0670w_D2	PFF0200c_DLD	MAL8P1.153	PF11_0091	PF11_0442	PFD0985w_D1	PFD0985w_D2	PF13_0026	PFL1085w
PFA0005w	PFA0005w	PFA0005w	PFA0005w	PFA0005w	PFA0005w				PFA0005w	PFA0005w	PFA0005w	PFA0005w	PFA0005w		PFA0005w	PFA0005w	PFA0005w	PFA0005w	PFA0005w		PFA0005w	PFA0005w		PFA0005w
PFA0010c	PFA0010c		PFA0010c	PFA0010c	PFA0010c				PFA0010c		PFA0010c	PFA0010c	PFA0010c		PFA0010c	PFA0010c		PFA0010c	PFA0010c		PFA0010c	PFA0010c		PFA0010c
PFA0015c	PFA0015c	PFA0015c	PFA0015c	PFA0015c	PFA0015c	PFA0015c			PFA0015c		PFA0015c	PFA0015c	PFA0015c		PFA0015c			PFA0015c	PFA0015c	PFA0015c	PFA0015c	PFA0015c		PFA0015c
PFA0020w	PFA0020w		PFA0020w	PFA0020w	PFA0020w	PFA0020w			PFA0020w		PFA0020w	PFA0020w	PFA0020w		PFA0020w	PFA0020w		PFA0020w	PFA0020w	PFA0020w	PFA0020w	PFA0020w	PFA0020w
PFA0025c	PFA0025c		PFA0025c	PFA0025c	PFA0025c				PFA0025c		PFA0025c	PFA0025c			PFA0025c	PFA0025c		PFA0025c			PFA0025c			PFA0025c
PFA0030c	PFA0030c	PFA0030c	PFA0030c	PFA0030c	PFA0030c	PFA0030c	PFA0030c		PFA0030c		PFA0030c	PFA0030c	PFA0030c		PFA0030c	PFA0030c		PFA0030c	PFA0030c		PFA0030c	PFA0030c		PFA0030c
PFA0035c	PFA0035c	PFA0035c	PFA0035c	PFA0035c	PFA0035c	PFA0035c	PFA0035c		PFA0035c		PFA0035c	PFA0035c	PFA0035c		PFA0035c	PFA0035c		PFA0035c	PFA0035c	PFA0035c	PFA0035c	PFA0035c	PFA0035c
PFA0040w	PFA0040w	PFA0040w	PFA0040w	PFA0040w	PFA0040w	PFA0040w			PFA0040w		PFA0040w	PFA0040w	PFA0040w		PFA0040w	PFA0040w		PFA0040w	PFA0040w		PFA0040w	PFA0040w		PFA0040w
PFA0045c	PFA0045c	PFA0045c	PFA0045c	PFA0045c	PFA0045c				PFA0045c		PFA0045c	PFA0045c	PFA0045c	PFA0045c	PFA0045c	PFA0045c		PFA0045c	PFA0045c	PFA0045c	PFA0045c	PFA0045c	PFA0045c	PFA0045c
PFA0050c	PFA0050c		PFA0050c	PFA0050c	PFA0050c	PFA0050c			PFA0050c		PFA0050c	PFA0050c	PFA0050c		PFA0050c	PFA0050c		PFA0050c	PFA0050c		PFA0050c	PFA0050c		PFA0050c
PFA0055c	PFA0055c		PFA0055c		PFA0055c				PFA0055c		PFA0055c	PFA0055c	PFA0055c		PFA0055c	PFA0055c		PFA0055c	PFA0055c		PFA0055c	PFA0055c		PFA0055c
PFA0060w	PFA0060w		PFA0060w		PFA0060w				PFA0060w		PFA0060w	PFA0060w	PFA0060w		PFA0060w	PFA0060w		PFA0060w	PFA0060w		PFA0060w	PFA0060w		PFA0060w
PFA0065w	PFA0065w	PFA0065w	PFA0065w		PFA0065w	PFA0065w	PFA0065w		PFA0065w	PFA0065w	PFA0065w	PFA0065w	PFA0065w	PFA0065w	PFA0065w	PFA0065w		PFA0065w	PFA0065w		PFA0065w	PFA0065w	PFA0065w	PFA0065w
PFA0070c	PFA0070c	PFA0070c	PFA0070c		PFA0070c	PFA0070c					PFA0070c	PFA0070c	PFA0070c	PFA0070c	PFA0070c			PFA0070c	PFA0070c		PFA0070c	PFA0070c	PFA0070c	PFA0070c
PFA0075w	PFA0075w	PFA0075w	PFA0075w		PFA0075w	PFA0075w					PFA0075w	PFA0075w	PFA0075w	PFA0075w	PFA0075w			PFA0075w	PFA0075w		PFA0075w	PFA0075w	PFA0075w	PFA0075w
PFA0080c	PFA0080c		PFA0080c	PFA0080c	PFA0080c	PFA0080c			PFA0080c	PFA0080c	PFA0080c	PFA0080c	PFA0080c	PFA0080c		PFA0080c		PFA0080c	PFA0080c		PFA0080c	PFA0080c	PFA0080c	PFA0080c
PFA0085c	PFA0085c		PFA0085c		PFA0085c						PFA0085c	PFA0085c	PFA0085c	PFA0085c	PFA0085c	PFA0085c		PFA0085c	PFA0085c		PFA0085c	PFA0085c	PFA0085c	PFA0085c
PFA0090c	PFA0090c		PFA0090c	PFA0090c	PFA0090c	PFA0090c			PFA0090c	PFA0090c	PFA0090c	PFA0090c	PFA0090c		PFA0090c	PFA0090c		PFA0090c	PFA0090c		PFA0090c	PFA0090c		PFA0090c
PFA0095c	PFA0095c	PFA0095c	PFA0095c	PFA0095c	PFA0095c	PFA0095c			PFA0095c		PFA0095c	PFA0095c	PFA0095c			PFA0095c		PFA0095c	PFA0095c		PFA0095c	PFA0095c		PFA0095c
PFA0100c	PFA0100c		PFA0100c	PFA0100c	PFA0100c	PFA0100c			PFA0100c	PFA0100c	PFA0100c	PFA0100c	PFA0100c	PFA0100c	PFA0100c	PFA0100c		PFA0100c	PFA0100c		PFA0100c		PFA0100c	PFA0100c
PFA0105w	PFA0105w		PFA0105w	PFA0105w	PFA0105w	PFA0105w			PFA0105w	PFA0105w	PFA0105w	PFA0105w	PFA0105w	PFA0105w	PFA0105w	PFA0105w		PFA0105w	PFA0105w		PFA0105w		PFA0105w
PFA0110w	PFA0110w	PFA0110w	PFA0110w	PFA0110w	PFA0110w	PFA0110w		PFA0110w	PFA0110w		PFA0110w	PFA0110w	PFA0110w			PFA0110w			PFA0110w	PFA0110w		PFA0110w
PFA0115w	PFA0115w		PFA0115w		PFA0115w				PFA0115w	PFA0115w	PFA0115w	PFA0115w	PFA0115w	PFA0115w	PFA0115w	PFA0115w		PFA0115w	PFA0115w		PFA0115w	PFA0115w	PFA0115w	PFA0115w
PFA0120c	PFA0120c		PFA0120c		PFA0120c	PFA0120c			PFA0120c	PFA0120c	PFA0120c	PFA0120c	PFA0120c	PFA0120c	PFA0120c	PFA0120c	PFA0120c	PFA0120c	PFA0120c		PFA0120c	PFA0120c	PFA0120c	PFA0120c
PFA0125c	PFA0125c	PFA0125c	PFA0125c	PFA0125c	PFA0125c	PFA0125c			PFA0125c		PFA0125c	PFA0125c	PFA0125c	PFA0125c	PFA0125c	PFA0125c		PFA0125c	PFA0125c		PFA0125c	PFA0125c	PFA0125c
PFA0130c	PFA0130c		PFA0130c		PFA0130c				PFA0130c	PFA0130c	PFA0130c	PFA0130c	PFA0130c		PFA0130c	PFA0130c		PFA0130c	PFA0130c		PFA0130c	PFA0130c		PFA0130c
PFA0135w	PFA0135w		PFA0135w	PFA0135w	PFA0135w				PFA0135w		PFA0135w	PFA0135w	PFA0135w		PFA0135w	PFA0135w		PFA0135w	PFA0135w		PFA0135w	PFA0135w		PFA0135w
PFA0140c	PFA0140c		PFA0140c	PFA0140c	PFA0140c	PFA0140c			PFA0140c		PFA0140c	PFA0140c	PFA0140c	PFA0140c	PFA0140c	PFA0140c		PFA0140c	PFA0140c		PFA0140c		PFA0140c	PFA0140c
PFA0145c	PFA0145c		PFA0145c	PFA0145c	PFA0145c				PFA0145c		PFA0145c	PFA0145c	PFA0145c	PFA0145c	PFA0145c	PFA0145c		PFA0145c	PFA0145c		PFA0145c	PFA0145c	PFA0145c	PFA0145c
PFA0150c	PFA0150c				PFA0150c	PFA0150c			PFA0150c		PFA0150c	PFA0150c	PFA0150c		PFA0150c			PFA0150c	PFA0150c	PFA0150c	PFA0150c	PFA0150c		PFA0150c
PFA0155c	PFA0155c		PFA0155c	PFA0155c	PFA0155c	PFA0155c			PFA0155c	PFA0155c	PFA0155c	PFA0155c	PFA0155c	PFA0155c	PFA0155c		PFA0155c	PFA0155c	PFA0155c		PFA0155c	PFA0155c	PFA0155c	PFA0155c
PFA0160c	PFA0160c		PFA0160c	PFA0160c	PFA0160c	PFA0160c			PFA0160c	PFA0160c	PFA0160c	PFA0160c			PFA0160c	PFA0160c	PFA0160c	PFA0160c	PFA0160c	PFA0160c	PFA0160c	PFA0160c		PFA0160c
PFA0165c	PFA0165c		PFA0165c		PFA0165c	PFA0165c			PFA0165c		PFA0165c	PFA0165c	PFA0165c	PFA0165c	PFA0165c	PFA0165c		PFA0165c	PFA0165c		PFA0165c	PFA0165c	PFA0165c	PFA0165c
PFA0170c	PFA0170c		PFA0170c	PFA0170c	PFA0170c	PFA0170c			PFA0170c	PFA0170c	PFA0170c	PFA0170c			PFA0170c		PFA0170c	PFA0170c	PFA0170c	PFA0170c	PFA0170c	PFA0170c		PFA0170c
PFA0175w	PFA0175w		PFA0175w	PFA0175w	PFA0175w	PFA0175w			PFA0175w	PFA0175w	PFA0175w	PFA0175w			PFA0175w		PFA0175w	PFA0175w	PFA0175w	PFA0175w	PFA0175w	PFA0175w		PFA0175w
PFA0180w	PFA0180w		PFA0180w		PFA0180w	PFA0180w			PFA0180w	PFA0180w	PFA0180w	PFA0180w		PFA0180w				PFA0180w	PFA0180w		PFA0180w	PFA0180w	PFA0180w	PFA0180w
PFA0185w	PFA0185w				PFA0185w	PFA0185w	PFA0185w		PFA0185w		PFA0185w	PFA0185w						PFA0185w			PFA0185w
PFA0190c	PFA0190c	PFA0190c	PFA0190c	PFA0190c	PFA0190c	PFA0190c	PFA0190c		PFA0190c	PFA0190c	PFA0190c	PFA0190c	PFA0190c	PFA0190c	PFA0190c	PFA0190c	PFA0190c	PFA0190c	PFA0190c	PFA0190c	PFA0190c	PFA0190c	PFA0190c	PFA0190c
PFA0195w	PFA0195w	PFA0195w	PFA0195w	PFA0195w	PFA0195w	PFA0195w	PFA0195w		PFA0195w	PFA0195w	PFA0195w	PFA0195w	PFA0195w	PFA0195w	PFA0195w	PFA0195w	PFA0195w	PFA0195w	PFA0195w	PFA0195w	PFA0195w	PFA0195w	PFA0195w	PFA0195w
PFA0200w	PFA0200w	PFA0200w		PFA0200w	PFA0200w	PFA0200w			PFA0200w		PFA0200w	PFA0200w	PFA0200w	PFA0200w	PFA0200w			PFA0200w	PFA0200w		PFA0200w	PFA0200w	PFA0200w	PFA0200w
PFA0205w	PFA0205w	PFA0205w	PFA0205w		PFA0205w	PFA0205w			PFA0205w	PFA0205w	PFA0205w	PFA0205w	PFA0205w	PFA0205w	PFA0205w	PFA0205w		PFA0205w	PFA0205w		PFA0205w	PFA0205w	PFA0205w	PFA0205w
PFA0210c	PFA0210c		PFA0210c	PFA0210c	PFA0210c						PFA0210c	PFA0210c	PFA0210c		PFA0210c	PFA0210c		PFA0210c	PFA0210c		PFA0210c	PFA0210c		PFA0210c
PFA0220w	PFA0220w		PFA0220w	PFA0220w	PFA0220w	PFA0220w			PFA0220w		PFA0220w	PFA0220w	PFA0220w	PFA0220w	PFA0220w	PFA0220w		PFA0220w	PFA0220w	PFA0220w	PFA0220w	PFA0220w	PFA0220w	PFA0220w
PFA0225w	PFA0225w		PFA0225w		PFA0225w	PFA0225w			PFA0225w		PFA0225w	PFA0225w	PFA0225w	PFA0225w	PFA0225w			PFA0225w	PFA0225w		PFA0225w	PFA0225w	PFA0225w	PFA0225w
PFA0230c	PFA0230c		PFA0230c	PFA0230c	PFA0230c	PFA0230c					PFA0230c	PFA0230c	PFA0230c	PFA0230c	PFA0230c			PFA0230c	PFA0230c		PFA0230c	PFA0230c	PFA0230c	PFA0230c
PFA0235w	PFA0235w		PFA0235w	PFA0235w	PFA0235w	PFA0235w			PFA0235w	PFA0235w	PFA0235w	PFA0235w	PFA0235w	PFA0235w	PFA0235w	PFA0235w	PFA0235w	PFA0235w	PFA0235w		PFA0235w	PFA0235w	PFA0235w	PFA0235w
PFA0240w	PFA0240w		PFA0240w	PFA0240w	PFA0240w				PFA0240w		PFA0240w	PFA0240w	PFA0240w		PFA0240w	PFA0240w		PFA0240w	PFA0240w		PFA0240w	PFA0240w
PFA0245w	PFA0245w		PFA0245w	PFA0245w	PFA0245w	PFA0245w			PFA0245w	PFA0245w	PFA0245w	PFA0245w	PFA0245w	PFA0245w	PFA0245w	PFA0245w		PFA0245w	PFA0245w		PFA0245w	PFA0245w	PFA0245w	PFA0245w
PFA0250w	PFA0250w		PFA0250w	PFA0250w	PFA0250w	PFA0250w			PFA0250w		PFA0250w	PFA0250w	PFA0250w	PFA0250w	PFA0250w	PFA0250w		PFA0250w	PFA0250w	PFA0250w	PFA0250w	PFA0250w	PFA0250w
PFA0255c	PFA0255c		PFA0255c		PFA0255c	PFA0255c			PFA0255c	PFA0255c	PFA0255c	PFA0255c	PFA0255c		PFA0255c	PFA0255c		PFA0255c	PFA0255c		PFA0255c	PFA0255c		PFA0255c
PFA0260c	PFA0260c		PFA0260c	PFA0260c	PFA0260c	PFA0260c			PFA0260c	PFA0260c	PFA0260c	PFA0260c	PFA0260c			PFA0260c		PFA0260c	PFA0260c		PFA0260c	PFA0260c	PFA0260c	PFA0260c
PFA0265c	PFA0265c	PFA0265c	PFA0265c	PFA0265c	PFA0265c	PFA0265c			PFA0265c	PFA0265c	PFA0265c	PFA0265c	PFA0265c			PFA0265c		PFA0265c	PFA0265c		PFA0265c	PFA0265c	PFA0265c	PFA0265c
PFA0270c	PFA0270c		PFA0270c		PFA0270c				PFA0270c		PFA0270c	PFA0270c	PFA0270c	PFA0270c	PFA0270c	PFA0270c		PFA0270c	PFA0270c		PFA0270c	PFA0270c	PFA0270c	PFA0270c
PFA0275c	PFA0275c		PFA0275c		PFA0275c	PFA0275c			PFA0275c	PFA0275c	PFA0275c	PFA0275c	PFA0275c	PFA0275c	PFA0275c	PFA0275c		PFA0275c	PFA0275c	PFA0275c	PFA0275c	PFA0275c	PFA0275c	PFA0275c
PFA0280w	PFA0280w		PFA0280w	PFA0280w	PFA0280w	PFA0280w			PFA0280w	PFA0280w	PFA0280w	PFA0280w	PFA0280w	PFA0280w	PFA0280w	PFA0280w	PFA0280w	PFA0280w	PFA0280w	PFA0280w	PFA0280w	PFA0280w	PFA0280w	PFA0280w
PFA0285c	PFA0285c		PFA0285c	PFA0285c	PFA0285c	PFA0285c	PFA0285c		PFA0285c	PFA0285c	PFA0285c	PFA0285c	PFA0285c	PFA0285c	PFA0285c	PFA0285c	PFA0285c	PFA0285c	PFA0285c		PFA0285c	PFA0285c	PFA0285c	PFA0285c
PFA0290w	PFA0290w		PFA0290w	PFA0290w	PFA0290w	PFA0290w	PFA0290w		PFA0290w	PFA0290w	PFA0290w	PFA0290w	PFA0290w	PFA0290w	PFA0290w	PFA0290w	PFA0290w	PFA0290w	PFA0290w		PFA0290w	PFA0290w	PFA0290w	PFA0290w
PFA0295c	PFA0295c		PFA0295c	PFA0295c	PFA0295c	PFA0295c			PFA0295c	PFA0295c	PFA0295c	PFA0295c	PFA0295c	PFA0295c	PFA0295c	PFA0295c		PFA0295c	PFA0295c		PFA0295c	PFA0295c	PFA0295c	PFA0295c
PFA0300c	PFA0300c		PFA0300c		PFA0300c				PFA0300c	PFA0300c	PFA0300c	PFA0300c	PFA0300c	PFA0300c				PFA0300c	PFA0300c		PFA0300c	PFA0300c	PFA0300c	PFA0300c
PFA0305c	PFA0305c		PFA0305c	PFA0305c	PFA0305c						PFA0305c	PFA0305c		PFA0305c	PFA0305c			PFA0305c	PFA0305c	PFA0305c	PFA0305c	PFA0305c	PFA0305c	PFA0305c
PFA0310c	PFA0310c		PFA0310c		PFA0310c	PFA0310c			PFA0310c		PFA0310c	PFA0310c	PFA0310c	PFA0310c	PFA0310c	PFA0310c		PFA0310c	PFA0310c		PFA0310c	PFA0310c	PFA0310c	PFA0310c
PFA0315w	PFA0315w		PFA0315w	PFA0315w	PFA0315w	PFA0315w			PFA0315w		PFA0315w	PFA0315w	PFA0315w		PFA0315w	PFA0315w		PFA0315w	PFA0315w		PFA0315w	PFA0315w		PFA0315w
PFA0320w	PFA0320w	PFA0320w	PFA0320w	PFA0320w	PFA0320w	PFA0320w			PFA0320w		PFA0320w	PFA0320w	PFA0320w	PFA0320w	PFA0320w			PFA0320w	PFA0320w	PFA0320w	PFA0320w	PFA0320w	PFA0320w	PFA0320w
PFA0325w	PFA0325w		PFA0325w	PFA0325w	PFA0325w	PFA0325w				PFA0325w	PFA0325w	PFA0325w			PFA0325w	PFA0325w		PFA0325w	PFA0325w		PFA0325w
PFA0330w	PFA0330w		PFA0330w	PFA0330w	PFA0330w				PFA0330w		PFA0330w	PFA0330w	PFA0330w		PFA0330w			PFA0330w	PFA0330w		PFA0330w	PFA0330w		PFA0330w
PFA0335w	PFA0335w		PFA0335w		PFA0335w	PFA0335w		PFA0335w	PFA0335w		PFA0335w	PFA0335w	PFA0335w	PFA0335w	PFA0335w	PFA0335w		PFA0335w	PFA0335w	PFA0335w	PFA0335w	PFA0335w	PFA0335w
PFA0340w	PFA0340w		PFA0340w		PFA0340w	PFA0340w		PFA0340w	PFA0340w	PFA0340w	PFA0340w	PFA0340w	PFA0340w	PFA0340w	PFA0340w	PFA0340w		PFA0340w	PFA0340w		PFA0340w	PFA0340w	PFA0340w	PFA0340w
PFA0345w	PFA0345w		PFA0345w		PFA0345w				PFA0345w		PFA0345w	PFA0345w	PFA0345w	PFA0345w	PFA0345w			PFA0345w	PFA0345w		PFA0345w	PFA0345w	PFA0345w	PFA0345w
PFA0350c	PFA0350c				PFA0350c				PFA0350c		PFA0350c	PFA0350c	PFA0350c	PFA0350c		PFA0350c		PFA0350c	PFA0350c		PFA0350c	PFA0350c	PFA0350c	PFA0350c
PFA0355w	PFA0355w				PFA0355w						PFA0355w	PFA0355w	PFA0355w	PFA0355w		PFA0355w		PFA0355w	PFA0355w		PFA0355w	PFA0355w	PFA0355w	PFA0355w
PFA0360c	PFA0360c	PFA0360c	PFA0360c		PFA0360c	PFA0360c			PFA0360c		PFA0360c	PFA0360c	PFA0360c		PFA0360c			PFA0360c	PFA0360c		PFA0360c	PFA0360c		PFA0360c
PFA0365c	PFA0365c	PFA0365c	PFA0365c	PFA0365c	PFA0365c	PFA0365c			PFA0365c		PFA0365c	PFA0365c	PFA0365c		PFA0365c	PFA0365c		PFA0365c	PFA0365c		PFA0365c	PFA0365c		PFA0365c
PFA0370w	PFA0370w	PFA0370w	PFA0370w	PFA0370w	PFA0370w	PFA0370w			PFA0370w		PFA0370w	PFA0370w	PFA0370w		PFA0370w	PFA0370w		PFA0370w	PFA0370w		PFA0370w	PFA0370w		PFA0370w
PFA0375c	PFA0375c	PFA0375c	PFA0375c	PFA0375c	PFA0375c	PFA0375c					PFA0375c	PFA0375c	PFA0375c	PFA0375c	PFA0375c	PFA0375c		PFA0375c	PFA0375c		PFA0375c	PFA0375c	PFA0375c	PFA0375c
PFA0380w	PFA0380w	PFA0380w	PFA0380w	PFA0380w	PFA0380w	PFA0380w			PFA0380w		PFA0380w	PFA0380w	PFA0380w	PFA0380w	PFA0380w	PFA0380w		PFA0380w	PFA0380w		PFA0380w	PFA0380w	PFA0380w	PFA0380w
PFA0385w	PFA0385w		PFA0385w		PFA0385w				PFA0385w	PFA0385w	PFA0385w	PFA0385w	PFA0385w	PFA0385w	PFA0385w	PFA0385w	PFA0385w	PFA0385w	PFA0385w		PFA0385w		PFA0385w	PFA0385w
PFA0390w	PFA0390w		PFA0390w	PFA0390w	PFA0390w				PFA0390w		PFA0390w	PFA0390w	PFA0390w		PFA0390w			PFA0390w	PFA0390w		PFA0390w	PFA0390w		PFA0390w
PFA0395w	PFA0395w	PFA0395w	PFA0395w	PFA0395w	PFA0395w	PFA0395w			PFA0395w		PFA0395w	PFA0395w	PFA0395w		PFA0395w	PFA0395w		PFA0395w	PFA0395w		PFA0395w	PFA0395w		PFA0395w
PFA0400c	PFA0400c		PFA0400c	PFA0400c	PFA0400c	PFA0400c			PFA0400c		PFA0400c	PFA0400c	PFA0400c	PFA0400c	PFA0400c			PFA0400c	PFA0400c		PFA0400c	PFA0400c	PFA0400c	PFA0400c
PFA0405w	PFA0405w		PFA0405w	PFA0405w	PFA0405w	PFA0405w			PFA0405w		PFA0405w	PFA0405w	PFA0405w		PFA0405w			PFA0405w	PFA0405w		PFA0405w	PFA0405w		PFA0405w
PFA0410w	PFA0410w	PFA0410w	PFA0410w	PFA0410w	PFA0410w	PFA0410w			PFA0410w		PFA0410w	PFA0410w	PFA0410w		PFA0410w	PFA0410w		PFA0410w	PFA0410w	PFA0410w	PFA0410w	PFA0410w		PFA0410w
PFA0415c	PFA0415c	PFA0415c	PFA0415c	PFA0415c	PFA0415c	PFA0415c			PFA0415c		PFA0415c	PFA0415c	PFA0415c		PFA0415c	PFA0415c		PFA0415c	PFA0415c		PFA0415c			PFA0415c
PFA0420w	PFA0420w	PFA0420w	PFA0420w	PFA0420w	PFA0420w	PFA0420w			PFA0420w		PFA0420w	PFA0420w	PFA0420w		PFA0420w	PFA0420w		PFA0420w	PFA0420w		PFA0420w	PFA0420w
PFA0425c	PFA0425c		PFA0425c	PFA0425c	PFA0425c	PFA0425c					PFA0425c	PFA0425c	PFA0425c					PFA0425c	PFA0425c		PFA0425c
PFA0430c	PFA0430c		PFA0430c		PFA0430c	PFA0430c			PFA0430c	PFA0430c	PFA0430c	PFA0430c		PFA0430c	PFA0430c		PFA0430c	PFA0430c	PFA0430c		PFA0430c	PFA0430c	PFA0430c	PFA0430c
PFA0435w	PFA0435w		PFA0435w		PFA0435w	PFA0435w			PFA0435w	PFA0435w	PFA0435w	PFA0435w		PFA0435w	PFA0435w		PFA0435w	PFA0435w	PFA0435w		PFA0435w	PFA0435w	PFA0435w	PFA0435w
PFA0440w	PFA0440w	PFA0440w	PFA0440w		PFA0440w	PFA0440w			PFA0440w	PFA0440w	PFA0440w	PFA0440w	PFA0440w	PFA0440w	PFA0440w	PFA0440w		PFA0440w	PFA0440w	PFA0440w	PFA0440w	PFA0440w	PFA0440w	PFA0440w
PFA0445w	PFA0445w		PFA0445w	PFA0445w	PFA0445w	PFA0445w			PFA0445w	PFA0445w	PFA0445w	PFA0445w	PFA0445w	PFA0445w	PFA0445w			PFA0445w	PFA0445w	PFA0445w	PFA0445w	PFA0445w	PFA0445w	PFA0445w
PFA0450c	PFA0450c		PFA0450c	PFA0450c	PFA0450c	PFA0450c			PFA0450c		PFA0450c	PFA0450c	PFA0450c		PFA0450c	PFA0450c		PFA0450c	PFA0450c	PFA0450c	PFA0450c	PFA0450c
PFA0455c	PFA0455c		PFA0455c	PFA0455c	PFA0455c				PFA0455c		PFA0455c	PFA0455c	PFA0455c		PFA0455c			PFA0455c	PFA0455c		PFA0455c	PFA0455c		PFA0455c
PFA0460c	PFA0460c		PFA0460c		PFA0460c	PFA0460c			PFA0460c	PFA0460c	PFA0460c	PFA0460c	PFA0460c	PFA0460c	PFA0460c			PFA0460c	PFA0460c		PFA0460c	PFA0460c	PFA0460c	PFA0460c
PFA0465c	PFA0465c		PFA0465c		PFA0465c	PFA0465c			PFA0465c	PFA0465c	PFA0465c	PFA0465c	PFA0465c	PFA0465c	PFA0465c			PFA0465c	PFA0465c		PFA0465c	PFA0465c	PFA0465c	PFA0465c
PFA0470c	PFA0470c		PFA0470c		PFA0470c				PFA0470c	PFA0470c	PFA0470c	PFA0470c	PFA0470c	PFA0470c	PFA0470c	PFA0470c		PFA0470c	PFA0470c		PFA0470c	PFA0470c	PFA0470c	PFA0470c
PFA0475c	PFA0475c		PFA0475c		PFA0475c	PFA0475c			PFA0475c		PFA0475c	PFA0475c	PFA0475c		PFA0475c	PFA0475c		PFA0475c	PFA0475c		PFA0475c
PFA0480w	PFA0480w		PFA0480w		PFA0480w	PFA0480w			PFA0480w	PFA0480w	PFA0480w	PFA0480w	PFA0480w	PFA0480w	PFA0480w	PFA0480w		PFA0480w	PFA0480w		PFA0480w	PFA0480w	PFA0480w	PFA0480w
PFA0485w	PFA0485w		PFA0485w		PFA0485w	PFA0485w			PFA0485w	PFA0485w	PFA0485w	PFA0485w	PFA0485w		PFA0485w	PFA0485w		PFA0485w	PFA0485w		PFA0485w	PFA0485w		PFA0485w
PFA0490w	PFA0490w		PFA0490w		PFA0490w						PFA0490w	PFA0490w	PFA0490w	PFA0490w				PFA0490w	PFA0490w		PFA0490w	PFA0490w	PFA0490w
PFA0495c	PFA0495c		PFA0495c	PFA0495c	PFA0495c	PFA0495c			PFA0495c		PFA0495c	PFA0495c	PFA0495c		PFA0495c			PFA0495c	PFA0495c		PFA0495c	PFA0495c		PFA0495c
PFA0500w	PFA0500w		PFA0500w	PFA0500w		PFA0500w			PFA0500w		PFA0500w	PFA0500w	PFA0500w		PFA0500w			PFA0500w	PFA0500w		PFA0500w	PFA0500w		PFA0500w
PFA0505c	PFA0505c	PFA0505c	PFA0505c	PFA0505c	PFA0505c	PFA0505c			PFA0505c	PFA0505c	PFA0505c	PFA0505c	PFA0505c	PFA0505c	PFA0505c	PFA0505c		PFA0505c	PFA0505c		PFA0505c	PFA0505c	PFA0505c	PFA0505c
PFA0510w	PFA0510w	PFA0510w	PFA0510w	PFA0510w	PFA0510w	PFA0510w			PFA0510w	PFA0510w	PFA0510w	PFA0510w	PFA0510w	PFA0510w	PFA0510w	PFA0510w		PFA0510w	PFA0510w		PFA0510w	PFA0510w	PFA0510w	PFA0510w
PFA0515w	PFA0515w		PFA0515w	PFA0515w	PFA0515w	PFA0515w	PFA0515w		PFA0515w	PFA0515w	PFA0515w	PFA0515w	PFA0515w	PFA0515w	PFA0515w	PFA0515w	PFA0515w	PFA0515w	PFA0515w		PFA0515w	PFA0515w	PFA0515w	PFA0515w
PFA0520c	PFA0520c		PFA0520c	PFA0520c	PFA0520c	PFA0520c			PFA0520c		PFA0520c	PFA0520c	PFA0520c	PFA0520c	PFA0520c	PFA0520c		PFA0520c	PFA0520c	PFA0520c	PFA0520c	PFA0520c	PFA0520c	PFA0520c
PFA0525w	PFA0525w	PFA0525w	PFA0525w	PFA0525w	PFA0525w	PFA0525w			PFA0525w		PFA0525w	PFA0525w	PFA0525w	PFA0525w	PFA0525w	PFA0525w		PFA0525w	PFA0525w	PFA0525w	PFA0525w	PFA0525w	PFA0525w	PFA0525w
PFA0530c	PFA0530c		PFA0530c	PFA0530c	PFA0530c	PFA0530c			PFA0530c		PFA0530c	PFA0530c	PFA0530c		PFA0530c	PFA0530c		PFA0530c	PFA0530c		PFA0530c	PFA0530c
PFA0535c	PFA0535c		PFA0535c	PFA0535c	PFA0535c	PFA0535c			PFA0535c	PFA0535c	PFA0535c	PFA0535c	PFA0535c	PFA0535c	PFA0535c	PFA0535c		PFA0535c	PFA0535c		PFA0535c	PFA0535c	PFA0535c	PFA0535c
PFA0540c	PFA0540c		PFA0540c		PFA0540c	PFA0540c			PFA0540c		PFA0540c	PFA0540c		PFA0540c	PFA0540c			PFA0540c	PFA0540c		PFA0540c		PFA0540c	PFA0540c
PFA0545c	PFA0545c		PFA0545c	PFA0545c	PFA0545c	PFA0545c			PFA0545c		PFA0545c	PFA0545c	PFA0545c	PFA0545c	PFA0545c	PFA0545c		PFA0545c	PFA0545c		PFA0545c	PFA0545c	PFA0545c	PFA0545c
PFA0550w	PFA0550w		PFA0550w	PFA0550w	PFA0550w	PFA0550w			PFA0550w		PFA0550w	PFA0550w	PFA0550w	PFA0550w	PFA0550w	PFA0550w		PFA0550w	PFA0550w		PFA0550w	PFA0550w	PFA0550w	PFA0550w
PFA0555c	PFA0555c		PFA0555c		PFA0555c				PFA0555c	PFA0555c	PFA0555c	PFA0555c	PFA0555c	PFA0555c			PFA0555c	PFA0555c	PFA0555c		PFA0555c	PFA0555c	PFA0555c	PFA0555c
PFA0560c	PFA0560c		PFA0560c		PFA0560c	PFA0560c			PFA0560c		PFA0560c	PFA0560c	PFA0560c		PFA0560c	PFA0560c		PFA0560c	PFA0560c	PFA0560c	PFA0560c	PFA0560c		PFA0560c
PFA0565c	PFA0565c		PFA0565c	PFA0565c	PFA0565c	PFA0565c			PFA0565c		PFA0565c	PFA0565c	PFA0565c		PFA0565c	PFA0565c		PFA0565c	PFA0565c		PFA0565c	PFA0565c		PFA0565c
PFA0570w	PFA0570w		PFA0570w	PFA0570w	PFA0570w	PFA0570w			PFA0570w		PFA0570w	PFA0570w	PFA0570w	PFA0570w	PFA0570w	PFA0570w		PFA0570w	PFA0570w		PFA0570w	PFA0570w	PFA0570w	PFA0570w
PFA0575c	PFA0575c		PFA0575c		PFA0575c	PFA0575c					PFA0575c	PFA0575c	PFA0575c		PFA0575c			PFA0575c	PFA0575c		PFA0575c	PFA0575c		PFA0575c
PFA0580c	PFA0580c		PFA0580c	PFA0580c	PFA0580c	PFA0580c			PFA0580c		PFA0580c	PFA0580c	PFA0580c		PFA0580c	PFA0580c		PFA0580c	PFA0580c	PFA0580c	PFA0580c	PFA0580c		PFA0580c
PFA0585w	PFA0585w		PFA0585w	PFA0585w	PFA0585w	PFA0585w			PFA0585w		PFA0585w	PFA0585w	PFA0585w		PFA0585w	PFA0585w		PFA0585w	PFA0585w	PFA0585w	PFA0585w	PFA0585w		PFA0585w
PFA0590w	PFA0590w		PFA0590w	PFA0590w	PFA0590w				PFA0590w	PFA0590w	PFA0590w	PFA0590w	PFA0590w		PFA0590w	PFA0590w		PFA0590w	PFA0590w		PFA0590w	PFA0590w
PFA0610c	PFA0610c		PFA0610c	PFA0610c	PFA0610c	PFA0610c			PFA0610c		PFA0610c	PFA0610c	PFA0610c		PFA0610c			PFA0610c	PFA0610c		PFA0610c	PFA0610c	PFA0610c	PFA0610c
PFA0615w	PFA0615w	PFA0615w	PFA0615w	PFA0615w	PFA0615w	PFA0615w			PFA0615w		PFA0615w	PFA0615w	PFA0615w	PFA0615w	PFA0615w			PFA0615w	PFA0615w		PFA0615w	PFA0615w	PFA0615w	PFA0615w
PFA0620c	PFA0620c		PFA0620c		PFA0620c				PFA0620c		PFA0620c	PFA0620c	PFA0620c		PFA0620c	PFA0620c		PFA0620c	PFA0620c	PFA0620c	PFA0620c	PFA0620c		PFA0620c
PFA0625w	PFA0625w		PFA0625w	PFA0625w	PFA0625w	PFA0625w			PFA0625w	PFA0625w	PFA0625w	PFA0625w	PFA0625w	PFA0625w	PFA0625w	PFA0625w		PFA0625w	PFA0625w		PFA0625w	PFA0625w	PFA0625w	PFA0625w
PFA0630c	PFA0630c		PFA0630c		PFA0630c		PFA0630c		PFA0630c	PFA0630c	PFA0630c	PFA0630c	PFA0630c		PFA0630c	PFA0630c	PFA0630c	PFA0630c	PFA0630c	PFA0630c	PFA0630c	PFA0630c		PFA0630c
PFA0635c	PFA0635c	PFA0635c	PFA0635c		PFA0635c	PFA0635c				PFA0635c	PFA0635c	PFA0635c	PFA0635c		PFA0635c	PFA0635c		PFA0635c	PFA0635c		PFA0635c
PFA0640c	PFA0640c	PFA0640c	PFA0640c	PFA0640c	PFA0640c	PFA0640c			PFA0640c	PFA0640c	PFA0640c	PFA0640c	PFA0640c	PFA0640c	PFA0640c			PFA0640c	PFA0640c		PFA0640c	PFA0640c	PFA0640c	PFA0640c
PFA0645c	PFA0645c	PFA0645c	PFA0645c	PFA0645c	PFA0645c	PFA0645c			PFA0645c		PFA0645c	PFA0645c	PFA0645c		PFA0645c			PFA0645c	PFA0645c		PFA0645c	PFA0645c		PFA0645c
PFA0650w	PFA0650w	PFA0650w	PFA0650w	PFA0650w	PFA0650w	PFA0650w			PFA0650w		PFA0650w	PFA0650w	PFA0650w		PFA0650w			PFA0650w	PFA0650w		PFA0650w	PFA0650w		PFA0650w
PFA0660w	PFA0660w		PFA0660w		PFA0660w	PFA0660w		PFA0660w	PFA0660w		PFA0660w	PFA0660w	PFA0660w		PFA0660w	PFA0660w		PFA0660w	PFA0660w	PFA0660w	PFA0660w	PFA0660w		PFA0660w
PFA0665w	PFA0665w	PFA0665w	PFA0665w	PFA0665w	PFA0665w	PFA0665w		PFA0665w	PFA0665w	PFA0665w	PFA0665w	PFA0665w	PFA0665w	PFA0665w	PFA0665w	PFA0665w	PFA0665w	PFA0665w	PFA0665w		PFA0665w	PFA0665w	PFA0665w	PFA0665w
PFA0670c	PFA0670c		PFA0670c	PFA0670c	PFA0670c	PFA0670c			PFA0670c		PFA0670c	PFA0670c	PFA0670c		PFA0670c	PFA0670c		PFA0670c	PFA0670c		PFA0670c	PFA0670c		PFA0670c
PFA0675w	PFA0675w	PFA0675w	PFA0675w	PFA0675w	PFA0675w	PFA0675w			PFA0675w		PFA0675w	PFA0675w	PFA0675w	PFA0675w	PFA0675w	PFA0675w		PFA0675w	PFA0675w	PFA0675w	PFA0675w	PFA0675w	PFA0675w	PFA0675w
PFA0680c	PFA0680c	PFA0680c	PFA0680c		PFA0680c	PFA0680c			PFA0680c	PFA0680c	PFA0680c	PFA0680c	PFA0680c	PFA0680c	PFA0680c	PFA0680c		PFA0680c	PFA0680c		PFA0680c	PFA0680c	PFA0680c	PFA0680c
PFA0685c	PFA0685c	PFA0685c	PFA0685c		PFA0685c				PFA0685c		PFA0685c	PFA0685c	PFA0685c		PFA0685c			PFA0685c	PFA0685c		PFA0685c			PFA0685c
PFA0690w	PFA0690w	PFA0690w	PFA0690w		PFA0690w				PFA0690w		PFA0690w	PFA0690w	PFA0690w		PFA0690w			PFA0690w	PFA0690w		PFA0690w			PFA0690w
PFA0695c	PFA0695c		PFA0695c	PFA0695c	PFA0695c	PFA0695c			PFA0695c		PFA0695c	PFA0695c	PFA0695c	PFA0695c		PFA0695c		PFA0695c	PFA0695c	PFA0695c	PFA0695c	PFA0695c	PFA0695c	PFA0695c
PFA0700c	PFA0700c		PFA0700c		PFA0700c	PFA0700c			PFA0700c	PFA0700c	PFA0700c	PFA0700c		PFA0700c	PFA0700c	PFA0700c	PFA0700c	PFA0700c	PFA0700c	PFA0700c	PFA0700c	PFA0700c	PFA0700c	PFA0700c
PFA0705c	PFA0705c		PFA0705c	PFA0705c	PFA0705c	PFA0705c	PFA0705c		PFA0705c		PFA0705c	PFA0705c	PFA0705c		PFA0705c	PFA0705c		PFA0705c	PFA0705c		PFA0705c	PFA0705c		PFA0705c
PFA0710c	PFA0710c	PFA0710c	PFA0710c	PFA0710c	PFA0710c	PFA0710c			PFA0710c		PFA0710c	PFA0710c	PFA0710c		PFA0710c	PFA0710c		PFA0710c	PFA0710c		PFA0710c	PFA0710c		PFA0710c
PFA0715c	PFA0715c		PFA0715c	PFA0715c	PFA0715c	PFA0715c			PFA0715c	PFA0715c	PFA0715c	PFA0715c	PFA0715c		PFA0715c	PFA0715c		PFA0715c	PFA0715c	PFA0715c	PFA0715c	PFA0715c		PFA0715c
PFA0720w	PFA0720w		PFA0720w	PFA0720w	PFA0720w	PFA0720w			PFA0720w	PFA0720w	PFA0720w	PFA0720w	PFA0720w		PFA0720w	PFA0720w		PFA0720w	PFA0720w	PFA0720w	PFA0720w	PFA0720w		PFA0720w
PFA0725w	PFA0725w	PFA0725w	PFA0725w	PFA0725w	PFA0725w	PFA0725w			PFA0725w	PFA0725w	PFA0725w	PFA0725w	PFA0725w	PFA0725w	PFA0725w	PFA0725w	PFA0725w	PFA0725w	PFA0725w	PFA0725w	PFA0725w	PFA0725w	PFA0725w	PFA0725w
PFA0735w	PFA0735w		PFA0735w	PFA0735w	PFA0735w	PFA0735w			PFA0735w		PFA0735w	PFA0735w	PFA0735w		PFA0735w	PFA0735w		PFA0735w	PFA0735w		PFA0735w	PFA0735w		PFA0735w
PFA0740w	PFA0740w	PFA0740w	PFA0740w	PFA0740w	PFA0740w	PFA0740w			PFA0740w		PFA0740w	PFA0740w	PFA0740w	PFA0740w	PFA0740w	PFA0740w		PFA0740w	PFA0740w	PFA0740w	PFA0740w	PFA0740w	PFA0740w	PFA0740w
PFA0745w	PFA0745w		PFA0745w	PFA0745w	PFA0745w				PFA0745w		PFA0745w	PFA0745w	PFA0745w		PFA0745w	PFA0745w		PFA0745w	PFA0745w		PFA0745w	PFA0745w		PFA0745w
PFA0750w	PFA0750w		PFA0750w	PFA0750w	PFA0750w	PFA0750w			PFA0750w	PFA0750w	PFA0750w	PFA0750w	PFA0750w		PFA0750w	PFA0750w	PFA0750w	PFA0750w	PFA0750w		PFA0750w	PFA0750w		PFA0750w
PFA0755w	PFA0755w		PFA0755w	PFA0755w	PFA0755w				PFA0755w	PFA0755w	PFA0755w	PFA0755w	PFA0755w	PFA0755w	PFA0755w		PFA0755w	PFA0755w	PFA0755w		PFA0755w	PFA0755w	PFA0755w	PFA0755w
PFA0760w	PFA0760w		PFA0760w	PFA0760w	PFA0760w				PFA0760w		PFA0760w	PFA0760w	PFA0760w	PFA0760w	PFA0760w	PFA0760w		PFA0760w	PFA0760w		PFA0760w	PFA0760w	PFA0760w
PFA0765c	PFA0765c	PFA0765c	PFA0765c	PFA0765c	PFA0765c				PFA0765c	PFA0765c	PFA0765c	PFA0765c	PFA0765c		PFA0765c	PFA0765c	PFA0765c	PFA0765c	PFA0765c		PFA0765c	PFA0765c		PFA0765c
PFB0010w	PFB0010w	PFB0010w	PFB0010w	PFB0010w	PFB0010w				PFB0010w	PFB0010w	PFB0010w	PFB0010w	PFB0010w	PFB0010w	PFB0010w	PFB0010w	PFB0010w	PFB0010w	PFB0010w		PFB0010w	PFB0010w	PFB0010w	PFB0010w
PFB0015c	PFB0015c		PFB0015c	PFB0015c	PFB0015c				PFB0015c		PFB0015c	PFB0015c	PFB0015c	PFB0015c	PFB0015c	PFB0015c		PFB0015c	PFB0015c		PFB0015c	PFB0015c	PFB0015c	PFB0015c
PFB0020c	PFB0020c		PFB0020c		PFB0020c	PFB0020c			PFB0020c		PFB0020c	PFB0020c	PFB0020c	PFB0020c	PFB0020c			PFB0020c	PFB0020c		PFB0020c	PFB0020c	PFB0020c
PFB0025c	PFB0025c		PFB0025c		PFB0025c	PFB0025c			PFB0025c		PFB0025c	PFB0025c	PFB0025c		PFB0025c	PFB0025c		PFB0025c	PFB0025c		PFB0025c	PFB0025c		PFB0025c
PFB0030c	PFB0030c		PFB0030c	PFB0030c	PFB0030c				PFB0030c		PFB0030c	PFB0030c	PFB0030c	PFB0030c	PFB0030c	PFB0030c		PFB0030c	PFB0030c		PFB0030c	PFB0030c	PFB0030c
PFB0035c	PFB0035c	PFB0035c	PFB0035c	PFB0035c	PFB0035c	PFB0035c			PFB0035c	PFB0035c	PFB0035c	PFB0035c	PFB0035c		PFB0035c	PFB0035c	PFB0035c	PFB0035c	PFB0035c	PFB0035c	PFB0035c	PFB0035c		PFB0035c
PFB0040c	PFB0040c		PFB0040c	PFB0040c	PFB0040c	PFB0040c			PFB0040c	PFB0040c	PFB0040c	PFB0040c	PFB0040c	PFB0040c		PFB0040c		PFB0040c	PFB0040c		PFB0040c	PFB0040c	PFB0040c	PFB0040c
PFB0045c	PFB0045c		PFB0045c		PFB0045c				PFB0045c		PFB0045c	PFB0045c	PFB0045c	PFB0045c	PFB0045c	PFB0045c		PFB0045c	PFB0045c		PFB0045c		PFB0045c	PFB0045c
PFB0050c	PFB0050c	PFB0050c	PFB0050c		PFB0050c	PFB0050c			PFB0050c		PFB0050c	PFB0050c	PFB0050c	PFB0050c	PFB0050c	PFB0050c		PFB0050c	PFB0050c	PFB0050c	PFB0050c	PFB0050c	PFB0050c	PFB0050c
PFB0055c	PFB0055c	PFB0055c	PFB0055c	PFB0055c	PFB0055c	PFB0055c			PFB0055c	PFB0055c	PFB0055c	PFB0055c	PFB0055c			PFB0055c		PFB0055c	PFB0055c		PFB0055c	PFB0055c		PFB0055c
PFB0056c	PFB0056c	PFB0056c	PFB0056c	PFB0056c	PFB0056c				PFB0056c		PFB0056c	PFB0056c	PFB0056c		PFB0056c	PFB0056c		PFB0056c	PFB0056c	PFB0056c	PFB0056c	PFB0056c	PFB0056c
PFB0060w	PFB0060w	PFB0060w	PFB0060w	PFB0060w	PFB0060w				PFB0060w		PFB0060w	PFB0060w	PFB0060w		PFB0060w	PFB0060w		PFB0060w	PFB0060w	PFB0060w	PFB0060w	PFB0060w	PFB0060w	PFB0060w
PFB0065w	PFB0065w		PFB0065w		PFB0065w	PFB0065w		PFB0065w	PFB0065w		PFB0065w	PFB0065w	PFB0065w		PFB0065w	PFB0065w		PFB0065w	PFB0065w		PFB0065w	PFB0065w		PFB0065w
PFB0070w	PFB0070w		PFB0070w		PFB0070w				PFB0070w	PFB0070w	PFB0070w	PFB0070w	PFB0070w		PFB0070w	PFB0070w	PFB0070w	PFB0070w			PFB0070w	PFB0070w		PFB0070w
PFB0075c	PFB0075c		PFB0075c		PFB0075c	PFB0075c			PFB0075c		PFB0075c	PFB0075c	PFB0075c		PFB0075c	PFB0075c		PFB0075c	PFB0075c		PFB0075c	PFB0075c		PFB0075c
PFB0080c	PFB0080c		PFB0080c	PFB0080c	PFB0080c	PFB0080c			PFB0080c		PFB0080c	PFB0080c	PFB0080c		PFB0080c	PFB0080c		PFB0080c	PFB0080c		PFB0080c	PFB0080c		PFB0080c
PFB0085c	PFB0085c	PFB0085c	PFB0085c	PFB0085c	PFB0085c	PFB0085c			PFB0085c		PFB0085c	PFB0085c	PFB0085c		PFB0085c	PFB0085c		PFB0085c	PFB0085c	PFB0085c	PFB0085c	PFB0085c		PFB0085c
PFB0090c	PFB0090c		PFB0090c	PFB0090c	PFB0090c	PFB0090c			PFB0090c		PFB0090c	PFB0090c	PFB0090c		PFB0090c	PFB0090c		PFB0090c	PFB0090c		PFB0090c	PFB0090c		PFB0090c
PFB0095c	PFB0095c	PFB0095c	PFB0095c		PFB0095c				PFB0095c	PFB0095c	PFB0095c	PFB0095c	PFB0095c	PFB0095c	PFB0095c	PFB0095c		PFB0095c	PFB0095c		PFB0095c	PFB0095c	PFB0095c	PFB0095c
PFB0100c	PFB0100c	PFB0100c	PFB0100c		PFB0100c	PFB0100c			PFB0100c		PFB0100c	PFB0100c	PFB0100c		PFB0100c	PFB0100c		PFB0100c	PFB0100c		PFB0100c	PFB0100c		PFB0100c
PFB0105c	PFB0105c	PFB0105c	PFB0105c	PFB0105c	PFB0105c	PFB0105c			PFB0105c		PFB0105c	PFB0105c	PFB0105c		PFB0105c	PFB0105c		PFB0105c	PFB0105c		PFB0105c	PFB0105c		PFB0105c
PFB0106c	PFB0106c	PFB0106c	PFB0106c	PFB0106c	PFB0106c				PFB0106c		PFB0106c	PFB0106c	PFB0106c		PFB0106c	PFB0106c			PFB0106c			PFB0106c		PFB0106c
PFB0110w	PFB0110w		PFB0110w	PFB0110w	PFB0110w	PFB0110w			PFB0110w		PFB0110w	PFB0110w	PFB0110w		PFB0110w	PFB0110w		PFB0110w	PFB0110w		PFB0110w	PFB0110w	PFB0110w	PFB0110w
PFB0115w	PFB0115w	PFB0115w	PFB0115w	PFB0115w	PFB0115w	PFB0115w			PFB0115w		PFB0115w	PFB0115w	PFB0115w		PFB0115w	PFB0115w		PFB0115w	PFB0115w		PFB0115w	PFB0115w		PFB0115w
PFB0120w	PFB0120w	PFB0120w	PFB0120w		PFB0120w	PFB0120w			PFB0120w		PFB0120w	PFB0120w	PFB0120w		PFB0120w	PFB0120w		PFB0120w	PFB0120w		PFB0120w	PFB0120w		PFB0120w
PFB0125c	PFB0125c		PFB0125c	PFB0125c	PFB0125c	PFB0125c			PFB0125c		PFB0125c	PFB0125c	PFB0125c	PFB0125c	PFB0125c	PFB0125c		PFB0125c	PFB0125c		PFB0125c	PFB0125c	PFB0125c	PFB0125c
PFB0130w	PFB0130w		PFB0130w	PFB0130w	PFB0130w	PFB0130w			PFB0130w		PFB0130w	PFB0130w	PFB0130w	PFB0130w	PFB0130w	PFB0130w		PFB0130w	PFB0130w		PFB0130w	PFB0130w	PFB0130w	PFB0130w
PFB0135w	PFB0135w	PFB0135w	PFB0135w	PFB0135w	PFB0135w				PFB0135w		PFB0135w	PFB0135w	PFB0135w	PFB0135w	PFB0135w	PFB0135w		PFB0135w	PFB0135w		PFB0135w	PFB0135w	PFB0135w
PFB0140w	PFB0140w	PFB0140w	PFB0140w	PFB0140w	PFB0140w				PFB0140w		PFB0140w	PFB0140w	PFB0140w	PFB0140w	PFB0140w	PFB0140w		PFB0140w	PFB0140w		PFB0140w	PFB0140w	PFB0140w
PFB0145c	PFB0145c	PFB0145c	PFB0145c	PFB0145c	PFB0145c	PFB0145c			PFB0145c		PFB0145c	PFB0145c	PFB0145c	PFB0145c	PFB0145c	PFB0145c		PFB0145c	PFB0145c		PFB0145c	PFB0145c	PFB0145c
PFB0150c	PFB0150c	PFB0150c	PFB0150c	PFB0150c	PFB0150c	PFB0150c			PFB0150c	PFB0150c	PFB0150c	PFB0150c	PFB0150c	PFB0150c	PFB0150c			PFB0150c	PFB0150c		PFB0150c	PFB0150c	PFB0150c	PFB0150c
PFB0151c	PFB0151c		PFB0151c	PFB0151c	PFB0151c	PFB0151c			PFB0151c	PFB0151c	PFB0151c	PFB0151c	PFB0151c	PFB0151c	PFB0151c	PFB0151c	PFB0151c	PFB0151c	PFB0151c		PFB0151c	PFB0151c	PFB0151c
PFB0160w	PFB0160w		PFB0160w		PFB0160w	PFB0160w			PFB0160w	PFB0160w	PFB0160w	PFB0160w	PFB0160w			PFB0160w	PFB0160w	PFB0160w	PFB0160w		PFB0160w	PFB0160w
PFB0161c	PFB0161c		PFB0161c	PFB0161c	PFB0161c				PFB0161c		PFB0161c	PFB0161c	PFB0161c	PFB0161c	PFB0161c	PFB0161c		PFB0161c	PFB0161c	PFB0161c	PFB0161c	PFB0161c	PFB0161c	PFB0161c
PFB0170w	PFB0170w		PFB0170w	PFB0170w	PFB0170w	PFB0170w			PFB0170w	PFB0170w	PFB0170w	PFB0170w	PFB0170w		PFB0170w	PFB0170w		PFB0170w	PFB0170w	PFB0170w	PFB0170w	PFB0170w		PFB0170w
PFB0175c	PFB0175c		PFB0175c	PFB0175c	PFB0175c	PFB0175c			PFB0175c		PFB0175c	PFB0175c	PFB0175c			PFB0175c		PFB0175c	PFB0175c	PFB0175c	PFB0175c	PFB0175c
PFB0177c	PFB0177c		PFB0177c		PFB0177c	PFB0177c			PFB0177c	PFB0177c	PFB0177c	PFB0177c	PFB0177c	PFB0177c	PFB0177c	PFB0177c		PFB0177c	PFB0177c		PFB0177c	PFB0177c	PFB0177c	PFB0177c
PFB0180w	PFB0180w		PFB0180w		PFB0180w	PFB0180w			PFB0180w	PFB0180w	PFB0180w	PFB0180w	PFB0180w	PFB0180w	PFB0180w	PFB0180w		PFB0180w	PFB0180w		PFB0180w	PFB0180w	PFB0180w	PFB0180w
PFB0185w	PFB0185w		PFB0185w		PFB0185w		PFB0185w		PFB0185w		PFB0185w	PFB0185w		PFB0185w	PFB0185w	PFB0185w		PFB0185w		PFB0185w	PFB0185w	PFB0185w	PFB0185w	PFB0185w
PFB0190c	PFB0190c		PFB0190c	PFB0190c	PFB0190c	PFB0190c			PFB0190c		PFB0190c	PFB0190c	PFB0190c	PFB0190c	PFB0190c	PFB0190c		PFB0190c	PFB0190c		PFB0190c	PFB0190c	PFB0190c	PFB0190c
PFB0194w	PFB0194w		PFB0194w	PFB0194w	PFB0194w	PFB0194w			PFB0194w		PFB0194w	PFB0194w	PFB0194w	PFB0194w	PFB0194w	PFB0194w		PFB0194w	PFB0194w	PFB0194w	PFB0194w	PFB0194w	PFB0194w	PFB0194w
PFB0195c	PFB0195c		PFB0195c	PFB0195c	PFB0195c				PFB0195c		PFB0195c	PFB0195c	PFB0195c	PFB0195c		PFB0195c		PFB0195c	PFB0195c		PFB0195c	PFB0195c	PFB0195c	PFB0195c
PFB0196c	PFB0196c		PFB0196c	PFB0196c	PFB0196c				PFB0196c		PFB0196c	PFB0196c	PFB0196c	PFB0196c	PFB0196c			PFB0196c	PFB0196c		PFB0196c	PFB0196c	PFB0196c
PFB0200c	PFB0200c		PFB0200c	PFB0200c	PFB0200c				PFB0200c		PFB0200c	PFB0200c	PFB0200c		PFB0200c			PFB0200c	PFB0200c		PFB0200c	PFB0200c
PFB0205c	PFB0205c		PFB0205c	PFB0205c	PFB0205c	PFB0205c	PFB0205c		PFB0205c		PFB0205c	PFB0205c	PFB0205c	PFB0205c	PFB0205c	PFB0205c		PFB0205c	PFB0205c		PFB0205c	PFB0205c	PFB0205c	PFB0205c
PFB0210c	PFB0210c		PFB0210c	PFB0210c	PFB0210c	PFB0210c			PFB0210c		PFB0210c	PFB0210c	PFB0210c		PFB0210c	PFB0210c		PFB0210c	PFB0210c		PFB0210c	PFB0210c		PFB0210c
PFB0215c	PFB0215c	PFB0215c	PFB0215c		PFB0215c	PFB0215c			PFB0215c		PFB0215c	PFB0215c	PFB0215c	PFB0215c	PFB0215c			PFB0215c	PFB0215c		PFB0215c	PFB0215c	PFB0215c	PFB0215c
PFB0220w	PFB0220w	PFB0220w	PFB0220w		PFB0220w	PFB0220w			PFB0220w		PFB0220w	PFB0220w	PFB0220w		PFB0220w			PFB0220w	PFB0220w		PFB0220w	PFB0220w		PFB0220w
PFB0225c	PFB0225c			PFB0225c	PFB0225c				PFB0225c		PFB0225c	PFB0225c	PFB0225c					PFB0225c	PFB0225c		PFB0225c	PFB0225c		PFB0225c
PFB0227c	PFB0227c		PFB0227c	PFB0227c	PFB0227c				PFB0227c		PFB0227c	PFB0227c	PFB0227c	PFB0227c	PFB0227c	PFB0227c		PFB0227c	PFB0227c		PFB0227c	PFB0227c	PFB0227c	PFB0227c
PFB0230c	PFB0230c		PFB0230c		PFB0230c				PFB0230c		PFB0230c	PFB0230c	PFB0230c	PFB0230c	PFB0230c	PFB0230c		PFB0230c	PFB0230c		PFB0230c	PFB0230c	PFB0230c	PFB0230c
PFB0235w	PFB0235w		PFB0235w		PFB0235w				PFB0235w		PFB0235w	PFB0235w	PFB0235w	PFB0235w	PFB0235w	PFB0235w		PFB0235w	PFB0235w		PFB0235w	PFB0235w	PFB0235w	PFB0235w
PFB0240w	PFB0240w		PFB0240w		PFB0240w	PFB0240w			PFB0240w		PFB0240w	PFB0240w	PFB0240w		PFB0240w			PFB0240w	PFB0240w		PFB0240w	PFB0240w		PFB0240w
PFB0245c	PFB0245c		PFB0245c	PFB0245c	PFB0245c	PFB0245c			PFB0245c	PFB0245c	PFB0245c	PFB0245c	PFB0245c	PFB0245c	PFB0245c	PFB0245c		PFB0245c	PFB0245c	PFB0245c	PFB0245c	PFB0245c	PFB0245c	PFB0245c
PFB0250w	PFB0250w		PFB0250w	PFB0250w	PFB0250w	PFB0250w			PFB0250w	PFB0250w	PFB0250w	PFB0250w	PFB0250w	PFB0250w	PFB0250w	PFB0250w		PFB0250w	PFB0250w	PFB0250w	PFB0250w	PFB0250w	PFB0250w	PFB0250w
PFB0255w	PFB0255w		PFB0255w		PFB0255w	PFB0255w				PFB0255w	PFB0255w	PFB0255w	PFB0255w		PFB0255w			PFB0255w	PFB0255w		PFB0255w	PFB0255w
PFB0257c	PFB0257c		PFB0257c		PFB0257c	PFB0257c			PFB0257c	PFB0257c	PFB0257c	PFB0257c	PFB0257c		PFB0257c	PFB0257c	PFB0257c	PFB0257c	PFB0257c		PFB0257c	PFB0257c		PFB0257c
PFB0260w	PFB0260w		PFB0260w		PFB0260w	PFB0260w			PFB0260w	PFB0260w	PFB0260w	PFB0260w	PFB0260w		PFB0260w	PFB0260w	PFB0260w	PFB0260w	PFB0260w		PFB0260w	PFB0260w		PFB0260w
PFB0265c	PFB0265c		PFB0265c	PFB0265c	PFB0265c	PFB0265c			PFB0265c		PFB0265c	PFB0265c	PFB0265c	PFB0265c	PFB0265c	PFB0265c		PFB0265c	PFB0265c	PFB0265c	PFB0265c	PFB0265c	PFB0265c	PFB0265c
PFB0270w	PFB0270w		PFB0270w	PFB0270w	PFB0270w	PFB0270w			PFB0270w		PFB0270w	PFB0270w	PFB0270w	PFB0270w	PFB0270w	PFB0270w		PFB0270w	PFB0270w	PFB0270w	PFB0270w	PFB0270w	PFB0270w	PFB0270w
PFB0275w	PFB0275w	PFB0275w	PFB0275w	PFB0275w	PFB0275w		PFB0275w		PFB0275w	PFB0275w	PFB0275w	PFB0275w	PFB0275w	PFB0275w	PFB0275w	PFB0275w		PFB0275w	PFB0275w	PFB0275w	PFB0275w	PFB0275w	PFB0275w	PFB0275w
PFB0279w	PFB0279w	PFB0279w	PFB0279w	PFB0279w	PFB0279w	PFB0279w		PFB0279w	PFB0279w		PFB0279w	PFB0279w	PFB0279w		PFB0279w	PFB0279w		PFB0279w	PFB0279w		PFB0279w	PFB0279w		PFB0279w
PFB0280w
PFB0285c	PFB0285c	PFB0285c	PFB0285c	PFB0285c	PFB0285c	PFB0285c			PFB0285c		PFB0285c	PFB0285c	PFB0285c		PFB0285c	PFB0285c		PFB0285c	PFB0285c	PFB0285c	PFB0285c	PFB0285c		PFB0285c
PFB0290c	PFB0290c		PFB0290c	PFB0290c	PFB0290c	PFB0290c			PFB0290c		PFB0290c	PFB0290c	PFB0290c	PFB0290c	PFB0290c	PFB0290c		PFB0290c	PFB0290c		PFB0290c	PFB0290c	PFB0290c	PFB0290c
PFB0295w	PFB0295w		PFB0295w	PFB0295w	PFB0295w	PFB0295w			PFB0295w		PFB0295w	PFB0295w	PFB0295w	PFB0295w	PFB0295w	PFB0295w		PFB0295w	PFB0295w		PFB0295w	PFB0295w	PFB0295w	PFB0295w
PFB0300c	PFB0300c		PFB0300c		PFB0300c			PFB0300c	PFB0300c	PFB0300c	PFB0300c	PFB0300c	PFB0300c	PFB0300c	PFB0300c		PFB0300c	PFB0300c	PFB0300c		PFB0300c		PFB0300c	PFB0300c
PFB0305c-a	PFB0305c-a	PFB0305c-a	PFB0305c-a	PFB0305c-a	PFB0305c-a				PFB0305c-a		PFB0305c-a	PFB0305c-a	PFB0305c-a		PFB0305c-a	PFB0305c-a		PFB0305c-a	PFB0305c-a	PFB0305c-a	PFB0305c-a	PFB0305c-a
PFB0305c-b	PFB0305c-b	PFB0305c-b	PFB0305c-b	PFB0305c-b	PFB0305c-b				PFB0305c-b		PFB0305c-b	PFB0305c-b	PFB0305c-b		PFB0305c-b	PFB0305c-b		PFB0305c-b	PFB0305c-b	PFB0305c-b	PFB0305c-b	PFB0305c-b
PFB0310c	PFB0310c	PFB0310c	PFB0310c	PFB0310c	PFB0310c	PFB0310c			PFB0310c	PFB0310c	PFB0310c	PFB0310c	PFB0310c	PFB0310c	PFB0310c	PFB0310c		PFB0310c	PFB0310c	PFB0310c	PFB0310c	PFB0310c	PFB0310c	PFB0310c
PFB0315w	PFB0315w	PFB0315w	PFB0315w		PFB0315w	PFB0315w			PFB0315w		PFB0315w	PFB0315w	PFB0315w	PFB0315w	PFB0315w	PFB0315w		PFB0315w	PFB0315w	PFB0315w	PFB0315w	PFB0315w	PFB0315w	PFB0315w
PFB0320c	PFB0320c		PFB0320c	PFB0320c	PFB0320c	PFB0320c			PFB0320c	PFB0320c	PFB0320c	PFB0320c	PFB0320c	PFB0320c		PFB0320c		PFB0320c	PFB0320c		PFB0320c	PFB0320c	PFB0320c	PFB0320c
PFB0325c	PFB0325c	PFB0325c	PFB0325c	PFB0325c	PFB0325c	PFB0325c			PFB0325c		PFB0325c	PFB0325c	PFB0325c	PFB0325c	PFB0325c			PFB0325c	PFB0325c	PFB0325c	PFB0325c	PFB0325c	PFB0325c	PFB0325c
PFB0330c	PFB0330c		PFB0330c	PFB0330c	PFB0330c	PFB0330c			PFB0330c	PFB0330c	PFB0330c	PFB0330c	PFB0330c		PFB0330c	PFB0330c		PFB0330c	PFB0330c		PFB0330c	PFB0330c		PFB0330c
PFB0335c	PFB0335c		PFB0335c		PFB0335c					PFB0335c	PFB0335c	PFB0335c	PFB0335c		PFB0335c	PFB0335c		PFB0335c	PFB0335c		PFB0335c	PFB0335c		PFB0335c
PFB0340c	PFB0340c	PFB0340c	PFB0340c	PFB0340c	PFB0340c	PFB0340c			PFB0340c	PFB0340c	PFB0340c	PFB0340c	PFB0340c	PFB0340c	PFB0340c	PFB0340c		PFB0340c	PFB0340c	PFB0340c	PFB0340c	PFB0340c	PFB0340c	PFB0340c
PFB0345c	PFB0345c		PFB0345c		PFB0345c				PFB0345c	PFB0345c	PFB0345c	PFB0345c	PFB0345c		PFB0345c	PFB0345c		PFB0345c	PFB0345c		PFB0345c			PFB0345c
PFB0350c	PFB0350c		PFB0350c		PFB0350c				PFB0350c	PFB0350c	PFB0350c	PFB0350c	PFB0350c		PFB0350c			PFB0350c	PFB0350c		PFB0350c			PFB0350c
PFB0355c	PFB0355c	PFB0355c	PFB0355c		PFB0355c	PFB0355c			PFB0355c		PFB0355c	PFB0355c	PFB0355c		PFB0355c	PFB0355c		PFB0355c	PFB0355c		PFB0355c	PFB0355c		PFB0355c
PFB0360c	PFB0360c		PFB0360c	PFB0360c	PFB0360c	PFB0360c			PFB0360c	PFB0360c	PFB0360c	PFB0360c	PFB0360c	PFB0360c	PFB0360c	PFB0360c		PFB0360c	PFB0360c		PFB0360c	PFB0360c	PFB0360c	PFB0360c
PFB0365w	PFB0365w		PFB0365w	PFB0365w	PFB0365w	PFB0365w			PFB0365w	PFB0365w	PFB0365w	PFB0365w	PFB0365w	PFB0365w	PFB0365w	PFB0365w		PFB0365w	PFB0365w		PFB0365w	PFB0365w	PFB0365w	PFB0365w
PFB0370c	PFB0370c		PFB0370c		PFB0370c	PFB0370c			PFB0370c	PFB0370c	PFB0370c	PFB0370c	PFB0370c		PFB0370c	PFB0370c		PFB0370c	PFB0370c		PFB0370c	PFB0370c		PFB0370c
PFB0375w	PFB0375w		PFB0375w		PFB0375w	PFB0375w			PFB0375w	PFB0375w	PFB0375w	PFB0375w	PFB0375w	PFB0375w	PFB0375w	PFB0375w	PFB0375w	PFB0375w	PFB0375w		PFB0375w	PFB0375w	PFB0375w	PFB0375w
PFB0380c	PFB0380c	PFB0380c	PFB0380c	PFB0380c	PFB0380c	PFB0380c			PFB0380c		PFB0380c	PFB0380c	PFB0380c	PFB0380c	PFB0380c	PFB0380c		PFB0380c	PFB0380c		PFB0380c	PFB0380c	PFB0380c	PFB0380c
PFB0385w	PFB0385w		PFB0385w	PFB0385w	PFB0385w	PFB0385w				PFB0385w	PFB0385w	PFB0385w	PFB0385w	PFB0385w	PFB0385w	PFB0385w		PFB0385w	PFB0385w	PFB0385w	PFB0385w	PFB0385w	PFB0385w	PFB0385w
PFB0390w	PFB0390w		PFB0390w	PFB0390w	PFB0390w	PFB0390w					PFB0390w	PFB0390w	PFB0390w		PFB0390w			PFB0390w	PFB0390w	PFB0390w	PFB0390w	PFB0390w		PFB0390w
PFB0391c-a	PFB0391c-a		PFB0391c-a		PFB0391c-a		PFB0391c-a		PFB0391c-a		PFB0391c-a	PFB0391c-a		PFB0391c-a	PFB0391c-a			PFB0391c-a	PFB0391c-a		PFB0391c-a	PFB0391c-a	PFB0391c-a
PFB0391c-b	PFB0391c-b		PFB0391c-b		PFB0391c-b		PFB0391c-b		PFB0391c-b		PFB0391c-b	PFB0391c-b		PFB0391c-b	PFB0391c-b			PFB0391c-b	PFB0391c-b		PFB0391c-b	PFB0391c-b	PFB0391c-b
PFB0395w	PFB0395w		PFB0395w		PFB0395w		PFB0395w		PFB0395w		PFB0395w	PFB0395w			PFB0395w			PFB0395w	PFB0395w		PFB0395w	PFB0395w
PFB0400w	PFB0400w		PFB0400w		PFB0400w				PFB0400w		PFB0400w	PFB0400w	PFB0400w	PFB0400w	PFB0400w	PFB0400w		PFB0400w	PFB0400w		PFB0400w	PFB0400w	PFB0400w	PFB0400w
PFB0405w	PFB0405w	PFB0405w	PFB0405w	PFB0405w	PFB0405w	PFB0405w			PFB0405w		PFB0405w	PFB0405w	PFB0405w	PFB0405w	PFB0405w	PFB0405w		PFB0405w	PFB0405w	PFB0405w	PFB0405w	PFB0405w	PFB0405w	PFB0405w
PFB0410c	PFB0410c		PFB0410c		PFB0410c	PFB0410c			PFB0410c		PFB0410c	PFB0410c	PFB0410c		PFB0410c	PFB0410c		PFB0410c	PFB0410c		PFB0410c	PFB0410c		PFB0410c
PFB0415c	PFB0415c		PFB0415c		PFB0415c	PFB0415c			PFB0415c		PFB0415c	PFB0415c			PFB0415c			PFB0415c	PFB0415c		PFB0415c			PFB0415c
PFB0420w	PFB0420w		PFB0420w		PFB0420w				PFB0420w		PFB0420w	PFB0420w			PFB0420w			PFB0420w	PFB0420w		PFB0420w			PFB0420w
PFB0423c	PFB0423c	PFB0423c	PFB0423c		PFB0423c				PFB0423c		PFB0423c	PFB0423c				PFB0423c		PFB0423c	PFB0423c		PFB0423c			PFB0423c
PFB0425c	PFB0425c	PFB0425c	PFB0425c		PFB0425c	PFB0425c			PFB0425c		PFB0425c	PFB0425c	PFB0425c	PFB0425c	PFB0425c	PFB0425c		PFB0425c	PFB0425c	PFB0425c	PFB0425c	PFB0425c	PFB0425c	PFB0425c
PFB0435c	PFB0435c		PFB0435c	PFB0435c	PFB0435c	PFB0435c			PFB0435c	PFB0435c	PFB0435c	PFB0435c	PFB0435c	PFB0435c		PFB0435c	PFB0435c	PFB0435c	PFB0435c	PFB0435c	PFB0435c	PFB0435c	PFB0435c	PFB0435c
PFB0440c	PFB0440c	PFB0440c	PFB0440c	PFB0440c	PFB0440c	PFB0440c	PFB0440c		PFB0440c	PFB0440c	PFB0440c	PFB0440c	PFB0440c	PFB0440c	PFB0440c	PFB0440c		PFB0440c	PFB0440c	PFB0440c	PFB0440c	PFB0440c	PFB0440c	PFB0440c
PFB0445c	PFB0445c		PFB0445c	PFB0445c	PFB0445c	PFB0445c	PFB0445c		PFB0445c		PFB0445c	PFB0445c	PFB0445c	PFB0445c	PFB0445c	PFB0445c		PFB0445c	PFB0445c		PFB0445c	PFB0445c	PFB0445c	PFB0445c
PFB0450w	PFB0450w		PFB0450w		PFB0450w	PFB0450w			PFB0450w		PFB0450w	PFB0450w	PFB0450w	PFB0450w	PFB0450w	PFB0450w		PFB0450w	PFB0450w		PFB0450w		PFB0450w	PFB0450w
PFB0455w	PFB0455w		PFB0455w	PFB0455w	PFB0455w				PFB0455w		PFB0455w	PFB0455w	PFB0455w		PFB0455w	PFB0455w		PFB0455w	PFB0455w	PFB0455w	PFB0455w	PFB0455w		PFB0455w
PFB0460c	PFB0460c		PFB0460c	PFB0460c	PFB0460c	PFB0460c			PFB0460c	PFB0460c	PFB0460c	PFB0460c	PFB0460c	PFB0460c	PFB0460c	PFB0460c		PFB0460c	PFB0460c	PFB0460c	PFB0460c	PFB0460c	PFB0460c	PFB0460c
PFB0465c	PFB0465c		PFB0465c	PFB0465c	PFB0465c	PFB0465c			PFB0465c		PFB0465c	PFB0465c	PFB0465c		PFB0465c	PFB0465c		PFB0465c	PFB0465c		PFB0465c
PFB0467w	PFB0467w		PFB0467w		PFB0467w	PFB0467w			PFB0467w		PFB0467w	PFB0467w	PFB0467w		PFB0467w	PFB0467w		PFB0467w	PFB0467w		PFB0467w
PFB0470w	PFB0470w		PFB0470w	PFB0470w	PFB0470w				PFB0470w	PFB0470w	PFB0470w	PFB0470w	PFB0470w		PFB0470w	PFB0470w		PFB0470w	PFB0470w		PFB0470w	PFB0470w		PFB0470w
PFB0475c	PFB0475c		PFB0475c	PFB0475c	PFB0475c	PFB0475c			PFB0475c		PFB0475c	PFB0475c	PFB0475c	PFB0475c	PFB0475c	PFB0475c		PFB0475c	PFB0475c		PFB0475c	PFB0475c	PFB0475c	PFB0475c
PFB0480w	PFB0480w		PFB0480w	PFB0480w	PFB0480w	PFB0480w			PFB0480w		PFB0480w	PFB0480w	PFB0480w	PFB0480w	PFB0480w	PFB0480w		PFB0480w	PFB0480w		PFB0480w	PFB0480w	PFB0480w	PFB0480w
PFB0485c	PFB0485c	PFB0485c	PFB0485c	PFB0485c	PFB0485c	PFB0485c			PFB0485c		PFB0485c	PFB0485c	PFB0485c		PFB0485c	PFB0485c		PFB0485c	PFB0485c		PFB0485c	PFB0485c		PFB0485c
PFB0490c	PFB0490c	PFB0490c	PFB0490c	PFB0490c	PFB0490c	PFB0490c			PFB0490c	PFB0490c	PFB0490c	PFB0490c	PFB0490c		PFB0490c	PFB0490c		PFB0490c	PFB0490c		PFB0490c		PFB0490c	PFB0490c
PFB0495w	PFB0495w		PFB0495w	PFB0495w	PFB0495w	PFB0495w			PFB0495w		PFB0495w	PFB0495w	PFB0495w	PFB0495w	PFB0495w	PFB0495w		PFB0495w	PFB0495w	PFB0495w	PFB0495w	PFB0495w	PFB0495w	PFB0495w
PFB0500c	PFB0500c		PFB0500c	PFB0500c	PFB0500c	PFB0500c			PFB0500c	PFB0500c	PFB0500c	PFB0500c	PFB0500c	PFB0500c	PFB0500c	PFB0500c		PFB0500c	PFB0500c	PFB0500c	PFB0500c	PFB0500c	PFB0500c
PFB0501c	PFB0501c				PFB0501c						PFB0501c	PFB0501c			PFB0501c			PFB0501c	PFB0501c		PFB0501c	PFB0501c
PFB0505c	PFB0505c	PFB0505c	PFB0505c	PFB0505c	PFB0505c	PFB0505c			PFB0505c		PFB0505c	PFB0505c	PFB0505c		PFB0505c	PFB0505c		PFB0505c	PFB0505c	PFB0505c	PFB0505c	PFB0505c		PFB0505c
PFB0510w	PFB0510w	PFB0510w	PFB0510w	PFB0510w	PFB0510w	PFB0510w			PFB0510w		PFB0510w	PFB0510w	PFB0510w		PFB0510w	PFB0510w		PFB0510w	PFB0510w	PFB0510w	PFB0510w	PFB0510w		PFB0510w
PFB0515w	PFB0515w		PFB0515w	PFB0515w	PFB0515w	PFB0515w			PFB0515w	PFB0515w	PFB0515w	PFB0515w	PFB0515w	PFB0515w	PFB0515w	PFB0515w	PFB0515w	PFB0515w	PFB0515w		PFB0515w	PFB0515w	PFB0515w	PFB0515w
PFB0520w	PFB0520w	PFB0520w	PFB0520w		PFB0520w	PFB0520w			PFB0520w		PFB0520w	PFB0520w	PFB0520w	PFB0520w	PFB0520w	PFB0520w		PFB0520w	PFB0520w		PFB0520w	PFB0520w	PFB0520w	PFB0520w
PFB0525w	PFB0525w	PFB0525w	PFB0525w	PFB0525w	PFB0525w	PFB0525w			PFB0525w		PFB0525w	PFB0525w	PFB0525w	PFB0525w	PFB0525w	PFB0525w		PFB0525w	PFB0525w	PFB0525w	PFB0525w	PFB0525w	PFB0525w	PFB0525w
PFB0530c	PFB0530c		PFB0530c		PFB0530c	PFB0530c			PFB0530c	PFB0530c	PFB0530c	PFB0530c	PFB0530c	PFB0530c	PFB0530c	PFB0530c		PFB0530c	PFB0530c		PFB0530c	PFB0530c	PFB0530c	PFB0530c
PFB0535w	PFB0535w		PFB0535w		PFB0535w	PFB0535w			PFB0535w	PFB0535w	PFB0535w	PFB0535w	PFB0535w	PFB0535w	PFB0535w	PFB0535w		PFB0535w	PFB0535w		PFB0535w	PFB0535w	PFB0535w	PFB0535w
PFB0540w	PFB0540w		PFB0540w		PFB0540w	PFB0540w			PFB0540w	PFB0540w	PFB0540w	PFB0540w	PFB0540w		PFB0540w			PFB0540w	PFB0540w		PFB0540w	PFB0540w		PFB0540w
PFB0545c	PFB0545c		PFB0545c	PFB0545c	PFB0545c	PFB0545c			PFB0545c		PFB0545c	PFB0545c	PFB0545c		PFB0545c	PFB0545c		PFB0545c	PFB0545c	PFB0545c	PFB0545c	PFB0545c		PFB0545c
PFB0550w	PFB0550w		PFB0550w	PFB0550w	PFB0550w	PFB0550w			PFB0550w		PFB0550w	PFB0550w	PFB0550w		PFB0550w	PFB0550w		PFB0550w	PFB0550w	PFB0550w	PFB0550w	PFB0550w		PFB0550w
PFB0555c	PFB0555c		PFB0555c		PFB0555c				PFB0555c		PFB0555c	PFB0555c	PFB0555c	PFB0555c	PFB0555c	PFB0555c		PFB0555c	PFB0555c		PFB0555c	PFB0555c	PFB0555c
PFB0560w	PFB0560w		PFB0560w		PFB0560w				PFB0560w		PFB0560w	PFB0560w	PFB0560w	PFB0560w	PFB0560w	PFB0560w		PFB0560w	PFB0560w		PFB0560w	PFB0560w	PFB0560w
PFB0570w	PFB0570w	PFB0570w	PFB0570w	PFB0570w	PFB0570w	PFB0570w			PFB0570w		PFB0570w	PFB0570w	PFB0570w	PFB0570w		PFB0570w		PFB0570w	PFB0570w		PFB0570w	PFB0570w	PFB0570w	PFB0570w
PFB0575c	PFB0575c		PFB0575c	PFB0575c	PFB0575c	PFB0575c			PFB0575c		PFB0575c	PFB0575c	PFB0575c	PFB0575c	PFB0575c	PFB0575c		PFB0575c	PFB0575c		PFB0575c	PFB0575c	PFB0575c	PFB0575c
PFB0580w	PFB0580w		PFB0580w	PFB0580w	PFB0580w	PFB0580w			PFB0580w		PFB0580w	PFB0580w	PFB0580w	PFB0580w	PFB0580w	PFB0580w		PFB0580w	PFB0580w		PFB0580w	PFB0580w	PFB0580w	PFB0580w
PFB0585w	PFB0585w		PFB0585w	PFB0585w	PFB0585w	PFB0585w			PFB0585w	PFB0585w	PFB0585w	PFB0585w	PFB0585w	PFB0585w	PFB0585w	PFB0585w		PFB0585w	PFB0585w		PFB0585w	PFB0585w	PFB0585w
PFB0590w	PFB0590w	PFB0590w	PFB0590w	PFB0590w	PFB0590w	PFB0590w			PFB0590w		PFB0590w	PFB0590w	PFB0590w	PFB0590w	PFB0590w	PFB0590w		PFB0590w	PFB0590w	PFB0590w	PFB0590w	PFB0590w	PFB0590w	PFB0590w
PFB0595w	PFB0595w		PFB0595w		PFB0595w	PFB0595w			PFB0595w		PFB0595w	PFB0595w	PFB0595w	PFB0595w	PFB0595w	PFB0595w		PFB0595w	PFB0595w		PFB0595w	PFB0595w	PFB0595w	PFB0595w
PFB0600c			PFB0600c						PFB0600c		PFB0600c	PFB0600c			PFB0600c			PFB0600c	PFB0600c		PFB0600c	PFB0600c
PFB0601c									PFB0601c		PFB0601c	PFB0601c			PFB0601c			PFB0601c			PFB0601c
PFB0605w	PFB0605w		PFB0605w		PFB0605w	PFB0605w			PFB0605w		PFB0605w	PFB0605w	PFB0605w	PFB0605w	PFB0605w			PFB0605w	PFB0605w		PFB0605w	PFB0605w	PFB0605w	PFB0605w
PFB0610c	PFB0610c		PFB0610c		PFB0610c	PFB0610c			PFB0610c		PFB0610c	PFB0610c	PFB0610c			PFB0610c
PFB0615c	PFB0615c		PFB0615c	PFB0615c	PFB0615c	PFB0615c			PFB0615c		PFB0615c	PFB0615c	PFB0615c		PFB0615c	PFB0615c		PFB0615c	PFB0615c		PFB0615c	PFB0615c
PFB0620w	PFB0620w		PFB0620w	PFB0620w	PFB0620w	PFB0620w			PFB0620w		PFB0620w	PFB0620w	PFB0620w		PFB0620w	PFB0620w		PFB0620w	PFB0620w		PFB0620w	PFB0620w
PFB0625w	PFB0625w		PFB0625w		PFB0625w				PFB0625w		PFB0625w	PFB0625w	PFB0625w	PFB0625w	PFB0625w	PFB0625w		PFB0625w	PFB0625w		PFB0625w	PFB0625w	PFB0625w
PFB0630c	PFB0630c		PFB0630c		PFB0630c	PFB0630c			PFB0630c		PFB0630c	PFB0630c	PFB0630c		PFB0630c			PFB0630c	PFB0630c		PFB0630c	PFB0630c		PFB0630c
PFB0635w	PFB0635w		PFB0635w		PFB0635w	PFB0635w			PFB0635w		PFB0635w	PFB0635w	PFB0635w		PFB0635w			PFB0635w	PFB0635w		PFB0635w	PFB0635w		PFB0635w
PFB0640c	PFB0640c	PFB0640c	PFB0640c	PFB0640c	PFB0640c	PFB0640c			PFB0640c	PFB0640c	PFB0640c	PFB0640c	PFB0640c	PFB0640c	PFB0640c	PFB0640c		PFB0640c	PFB0640c		PFB0640c	PFB0640c	PFB0640c	PFB0640c
PFB0645c	PFB0645c	PFB0645c	PFB0645c		PFB0645c	PFB0645c	PFB0645c		PFB0645c		PFB0645c	PFB0645c	PFB0645c	PFB0645c	PFB0645c	PFB0645c		PFB0645c	PFB0645c		PFB0645c	PFB0645c	PFB0645c	PFB0645c
PFB0650w	PFB0650w	PFB0650w	PFB0650w	PFB0650w	PFB0650w				PFB0650w	PFB0650w	PFB0650w	PFB0650w	PFB0650w	PFB0650w	PFB0650w	PFB0650w	PFB0650w	PFB0650w	PFB0650w		PFB0650w	PFB0650w	PFB0650w	PFB0650w
PFB0655c	PFB0655c		PFB0655c	PFB0655c	PFB0655c	PFB0655c	PFB0655c		PFB0655c		PFB0655c	PFB0655c	PFB0655c		PFB0655c			PFB0655c	PFB0655c		PFB0655c	PFB0655c		PFB0655c
PFB0660w	PFB0660w		PFB0660w	PFB0660w	PFB0660w	PFB0660w	PFB0660w		PFB0660w		PFB0660w	PFB0660w	PFB0660w		PFB0660w			PFB0660w	PFB0660w		PFB0660w	PFB0660w		PFB0660w
PFB0665w	PFB0665w		PFB0665w	PFB0665w	PFB0665w	PFB0665w			PFB0665w	PFB0665w	PFB0665w	PFB0665w	PFB0665w	PFB0665w	PFB0665w	PFB0665w		PFB0665w	PFB0665w	PFB0665w	PFB0665w	PFB0665w	PFB0665w	PFB0665w
PFB0670c	PFB0670c		PFB0670c	PFB0670c	PFB0670c	PFB0670c			PFB0670c	PFB0670c	PFB0670c	PFB0670c	PFB0670c	PFB0670c	PFB0670c	PFB0670c		PFB0670c	PFB0670c	PFB0670c	PFB0670c	PFB0670c	PFB0670c	PFB0670c
PFB0675w	PFB0675w		PFB0675w	PFB0675w	PFB0675w	PFB0675w			PFB0675w		PFB0675w	PFB0675w	PFB0675w	PFB0675w	PFB0675w	PFB0675w		PFB0675w	PFB0675w		PFB0675w	PFB0675w	PFB0675w	PFB0675w
PFB0680w	PFB0680w	PFB0680w	PFB0680w		PFB0680w	PFB0680w			PFB0680w	PFB0680w	PFB0680w	PFB0680w	PFB0680w			PFB0680w		PFB0680w	PFB0680w		PFB0680w			PFB0680w
PFB0685c	PFB0685c		PFB0685c	PFB0685c	PFB0685c	PFB0685c			PFB0685c	PFB0685c	PFB0685c	PFB0685c	PFB0685c	PFB0685c	PFB0685c	PFB0685c	PFB0685c	PFB0685c	PFB0685c	PFB0685c	PFB0685c	PFB0685c	PFB0685c	PFB0685c
PFB0687c	PFB0687c	PFB0687c	PFB0687c	PFB0687c	PFB0687c		PFB0687c		PFB0687c	PFB0687c	PFB0687c	PFB0687c	PFB0687c	PFB0687c	PFB0687c	PFB0687c		PFB0687c	PFB0687c		PFB0687c	PFB0687c	PFB0687c	PFB0687c
PFB0690w	PFB0690w	PFB0690w	PFB0690w	PFB0690w	PFB0690w	PFB0690w	PFB0690w		PFB0690w	PFB0690w	PFB0690w	PFB0690w	PFB0690w	PFB0690w	PFB0690w	PFB0690w		PFB0690w	PFB0690w		PFB0690w	PFB0690w	PFB0690w	PFB0690w
PFB0695c	PFB0695c	PFB0695c	PFB0695c	PFB0695c	PFB0695c	PFB0695c			PFB0695c	PFB0695c	PFB0695c	PFB0695c	PFB0695c	PFB0695c	PFB0695c	PFB0695c		PFB0695c	PFB0695c		PFB0695c	PFB0695c	PFB0695c	PFB0695c
PFB0700c	PFB0700c		PFB0700c		PFB0700c	PFB0700c			PFB0700c		PFB0700c	PFB0700c	PFB0700c	PFB0700c	PFB0700c			PFB0700c	PFB0700c		PFB0700c	PFB0700c	PFB0700c	PFB0700c
PFB0705w	PFB0705w		PFB0705w	PFB0705w	PFB0705w				PFB0705w		PFB0705w	PFB0705w	PFB0705w	PFB0705w	PFB0705w			PFB0705w	PFB0705w		PFB0705w	PFB0705w	PFB0705w	PFB0705w
PFB0710c	PFB0710c		PFB0710c	PFB0710c	PFB0710c	PFB0710c			PFB0710c		PFB0710c	PFB0710c	PFB0710c			PFB0710c		PFB0710c	PFB0710c		PFB0710c	PFB0710c		PFB0710c
PFB0715w	PFB0715w		PFB0715w	PFB0715w	PFB0715w	PFB0715w			PFB0715w		PFB0715w	PFB0715w	PFB0715w			PFB0715w		PFB0715w	PFB0715w		PFB0715w	PFB0715w		PFB0715w
PFB0720c	PFB0720c		PFB0720c	PFB0720c	PFB0720c	PFB0720c			PFB0720c		PFB0720c	PFB0720c	PFB0720c	PFB0720c	PFB0720c	PFB0720c		PFB0720c	PFB0720c		PFB0720c	PFB0720c	PFB0720c	PFB0720c
PFB0725c	PFB0725c		PFB0725c	PFB0725c	PFB0725c	PFB0725c			PFB0725c	PFB0725c	PFB0725c	PFB0725c	PFB0725c	PFB0725c	PFB0725c	PFB0725c	PFB0725c	PFB0725c	PFB0725c		PFB0725c	PFB0725c	PFB0725c	PFB0725c
PFB0730w	PFB0730w		PFB0730w	PFB0730w	PFB0730w	PFB0730w			PFB0730w	PFB0730w	PFB0730w	PFB0730w	PFB0730w	PFB0730w	PFB0730w	PFB0730w	PFB0730w	PFB0730w	PFB0730w		PFB0730w	PFB0730w	PFB0730w	PFB0730w
PFB0732c	PFB0732c		PFB0732c	PFB0732c	PFB0732c		PFB0732c		PFB0732c	PFB0732c	PFB0732c	PFB0732c			PFB0732c			PFB0732c	PFB0732c		PFB0732c	PFB0732c
PFB0735c	PFB0735c			PFB0735c	PFB0735c		PFB0735c				PFB0735c	PFB0735c			PFB0735c			PFB0735c	PFB0735c		PFB0735c
PFB0745w	PFB0745w		PFB0745w	PFB0745w	PFB0745w		PFB0745w		PFB0745w	PFB0745w	PFB0745w	PFB0745w			PFB0745w			PFB0745w	PFB0745w		PFB0745w	PFB0745w
PFB0750w	PFB0750w		PFB0750w		PFB0750w	PFB0750w			PFB0750w	PFB0750w	PFB0750w	PFB0750w	PFB0750w	PFB0750w	PFB0750w		PFB0750w	PFB0750w	PFB0750w		PFB0750w	PFB0750w	PFB0750w	PFB0750w
PFB0755w	PFB0755w	PFB0755w	PFB0755w	PFB0755w	PFB0755w	PFB0755w			PFB0755w		PFB0755w	PFB0755w	PFB0755w	PFB0755w	PFB0755w	PFB0755w		PFB0755w	PFB0755w		PFB0755w	PFB0755w	PFB0755w	PFB0755w
PFB0760w	PFB0760w	PFB0760w	PFB0760w	PFB0760w	PFB0760w	PFB0760w			PFB0760w	PFB0760w	PFB0760w	PFB0760w	PFB0760w		PFB0760w			PFB0760w	PFB0760w		PFB0760w	PFB0760w		PFB0760w
PFB0765w	PFB0765w		PFB0765w	PFB0765w	PFB0765w	PFB0765w			PFB0765w	PFB0765w	PFB0765w	PFB0765w	PFB0765w	PFB0765w	PFB0765w	PFB0765w		PFB0765w	PFB0765w		PFB0765w	PFB0765w	PFB0765w	PFB0765w
PFB0770c	PFB0770c		PFB0770c		PFB0770c	PFB0770c	PFB0770c		PFB0770c	PFB0770c	PFB0770c	PFB0770c		PFB0770c	PFB0770c	PFB0770c	PFB0770c	PFB0770c	PFB0770c		PFB0770c	PFB0770c	PFB0770c	PFB0770c
PFB0775w	PFB0775w		PFB0775w		PFB0775w	PFB0775w	PFB0775w		PFB0775w	PFB0775w	PFB0775w	PFB0775w		PFB0775w	PFB0775w	PFB0775w	PFB0775w	PFB0775w	PFB0775w		PFB0775w	PFB0775w	PFB0775w	PFB0775w
PFB0790c	PFB0790c		PFB0790c		PFB0790c	PFB0790c			PFB0790c		PFB0790c	PFB0790c	PFB0790c	PFB0790c	PFB0790c	PFB0790c		PFB0790c	PFB0790c		PFB0790c	PFB0790c	PFB0790c	PFB0790c
PFB0795w	PFB0795w		PFB0795w		PFB0795w	PFB0795w			PFB0795w		PFB0795w	PFB0795w	PFB0795w	PFB0795w	PFB0795w	PFB0795w		PFB0795w	PFB0795w		PFB0795w	PFB0795w	PFB0795w	PFB0795w
PFB0800c	PFB0800c		PFB0800c	PFB0800c	PFB0800c	PFB0800c			PFB0800c		PFB0800c	PFB0800c	PFB0800c		PFB0800c	PFB0800c		PFB0800c	PFB0800c		PFB0800c	PFB0800c		PFB0800c
PFB0805c	PFB0805c		PFB0805c	PFB0805c	PFB0805c	PFB0805c			PFB0805c		PFB0805c	PFB0805c	PFB0805c	PFB0805c	PFB0805c	PFB0805c		PFB0805c	PFB0805c		PFB0805c	PFB0805c	PFB0805c
PFB0810w	PFB0810w		PFB0810w	PFB0810w	PFB0810w	PFB0810w			PFB0810w		PFB0810w	PFB0810w	PFB0810w	PFB0810w	PFB0810w	PFB0810w		PFB0810w	PFB0810w		PFB0810w	PFB0810w	PFB0810w
PFB0815w	PFB0815w	PFB0815w	PFB0815w	PFB0815w	PFB0815w	PFB0815w		PFB0815w	PFB0815w	PFB0815w	PFB0815w	PFB0815w	PFB0815w	PFB0815w	PFB0815w		PFB0815w	PFB0815w	PFB0815w		PFB0815w	PFB0815w	PFB0815w	PFB0815w
PFB0820c	PFB0820c		PFB0820c		PFB0820c	PFB0820c			PFB0820c		PFB0820c	PFB0820c	PFB0820c		PFB0820c			PFB0820c	PFB0820c		PFB0820c	PFB0820c		PFB0820c
PFB0826c	PFB0826c		PFB0826c		PFB0826c	PFB0826c			PFB0826c	PFB0826c	PFB0826c	PFB0826c	PFB0826c	PFB0826c	PFB0826c	PFB0826c		PFB0826c	PFB0826c		PFB0826c	PFB0826c	PFB0826c	PFB0826c
PFB0830w	PFB0830w		PFB0830w		PFB0830w	PFB0830w			PFB0830w	PFB0830w	PFB0830w	PFB0830w	PFB0830w	PFB0830w	PFB0830w	PFB0830w		PFB0830w	PFB0830w		PFB0830w	PFB0830w	PFB0830w	PFB0830w
PFB0835c	PFB0835c		PFB0835c	PFB0835c	PFB0835c	PFB0835c			PFB0835c	PFB0835c	PFB0835c	PFB0835c		PFB0835c	PFB0835c	PFB0835c		PFB0835c	PFB0835c	PFB0835c	PFB0835c	PFB0835c	PFB0835c	PFB0835c
PFB0840w	PFB0840w		PFB0840w	PFB0840w	PFB0840w	PFB0840w			PFB0840w	PFB0840w	PFB0840w	PFB0840w		PFB0840w	PFB0840w	PFB0840w		PFB0840w	PFB0840w	PFB0840w	PFB0840w	PFB0840w	PFB0840w	PFB0840w
PFB0845w	PFB0845w		PFB0845w	PFB0845w	PFB0845w	PFB0845w			PFB0845w		PFB0845w	PFB0845w	PFB0845w		PFB0845w			PFB0845w	PFB0845w		PFB0845w	PFB0845w		PFB0845w
PFB0850c	PFB0850c		PFB0850c	PFB0850c	PFB0850c				PFB0850c	PFB0850c	PFB0850c	PFB0850c		PFB0850c	PFB0850c			PFB0850c	PFB0850c		PFB0850c	PFB0850c	PFB0850c	PFB0850c
PFB0855c	PFB0855c		PFB0855c	PFB0855c	PFB0855c				PFB0855c		PFB0855c	PFB0855c						PFB0855c	PFB0855c		PFB0855c	PFB0855c		PFB0855c
PFB0860c	PFB0860c		PFB0860c	PFB0860c	PFB0860c						PFB0860c	PFB0860c	PFB0860c	PFB0860c	PFB0860c	PFB0860c		PFB0860c	PFB0860c		PFB0860c	PFB0860c	PFB0860c	PFB0860c
PFB0865w	PFB0865w		PFB0865w	PFB0865w	PFB0865w						PFB0865w	PFB0865w	PFB0865w	PFB0865w	PFB0865w	PFB0865w		PFB0865w	PFB0865w		PFB0865w	PFB0865w	PFB0865w
PFB0870w	PFB0870w		PFB0870w	PFB0870w	PFB0870w	PFB0870w			PFB0870w	PFB0870w	PFB0870w	PFB0870w	PFB0870w	PFB0870w	PFB0870w			PFB0870w	PFB0870w	PFB0870w	PFB0870w	PFB0870w	PFB0870w	PFB0870w
PFB0875c	PFB0875c		PFB0875c		PFB0875c	PFB0875c			PFB0875c		PFB0875c	PFB0875c	PFB0875c		PFB0875c			PFB0875c	PFB0875c		PFB0875c	PFB0875c
PFB0877c	PFB0877c		PFB0877c	PFB0877c	PFB0877c	PFB0877c	PFB0877c		PFB0877c		PFB0877c	PFB0877c			PFB0877c	PFB0877c		PFB0877c	PFB0877c	PFB0877c	PFB0877c	PFB0877c		PFB0877c
PFB0880w	PFB0880w		PFB0880w	PFB0880w	PFB0880w	PFB0880w	PFB0880w		PFB0880w		PFB0880w	PFB0880w			PFB0880w	PFB0880w		PFB0880w	PFB0880w	PFB0880w	PFB0880w	PFB0880w		PFB0880w
PFB0885w	PFB0885w		PFB0885w	PFB0885w	PFB0885w				PFB0885w		PFB0885w	PFB0885w	PFB0885w		PFB0885w			PFB0885w	PFB0885w		PFB0885w	PFB0885w		PFB0885w
PFB0886c	PFB0886c		PFB0886c		PFB0886c	PFB0886c			PFB0886c		PFB0886c	PFB0886c			PFB0886c	PFB0886c		PFB0886c	PFB0886c		PFB0886c	PFB0886c		PFB0886c
PFB0888w-a	PFB0888w-a		PFB0888w-a		PFB0888w-a	PFB0888w-a			PFB0888w-a		PFB0888w-a	PFB0888w-a			PFB0888w-a	PFB0888w-a		PFB0888w-a	PFB0888w-a		PFB0888w-a			PFB0888w-a
PFB0888w-b	PFB0888w-b		PFB0888w-b	PFB0888w-b	PFB0888w-b	PFB0888w-b			PFB0888w-b		PFB0888w-b	PFB0888w-b	PFB0888w-b		PFB0888w-b	PFB0888w-b		PFB0888w-b	PFB0888w-b		PFB0888w-b	PFB0888w-b		PFB0888w-b
PFB0890c	PFB0890c		PFB0890c	PFB0890c	PFB0890c	PFB0890c		PFB0890c	PFB0890c		PFB0890c	PFB0890c	PFB0890c		PFB0890c	PFB0890c		PFB0890c	PFB0890c		PFB0890c	PFB0890c		PFB0890c
PFB0895c	PFB0895c		PFB0895c		PFB0895c	PFB0895c			PFB0895c	PFB0895c	PFB0895c	PFB0895c		PFB0895c	PFB0895c			PFB0895c	PFB0895c	PFB0895c	PFB0895c	PFB0895c	PFB0895c	PFB0895c
PFB0900c	PFB0900c	PFB0900c	PFB0900c	PFB0900c	PFB0900c	PFB0900c			PFB0900c		PFB0900c	PFB0900c	PFB0900c		PFB0900c	PFB0900c		PFB0900c	PFB0900c		PFB0900c	PFB0900c		PFB0900c
PFB0905c	PFB0905c		PFB0905c	PFB0905c	PFB0905c	PFB0905c			PFB0905c	PFB0905c	PFB0905c	PFB0905c	PFB0905c		PFB0905c	PFB0905c		PFB0905c	PFB0905c		PFB0905c	PFB0905c		PFB0905c
PFB0910w	PFB0910w	PFB0910w	PFB0910w	PFB0910w	PFB0910w	PFB0910w			PFB0910w		PFB0910w	PFB0910w	PFB0910w	PFB0910w	PFB0910w	PFB0910w		PFB0910w	PFB0910w	PFB0910w	PFB0910w	PFB0910w	PFB0910w
PFB0915w	PFB0915w		PFB0915w	PFB0915w	PFB0915w	PFB0915w			PFB0915w		PFB0915w	PFB0915w				PFB0915w		PFB0915w	PFB0915w		PFB0915w	PFB0915w		PFB0915w
PFB0920w	PFB0920w		PFB0920w		PFB0920w	PFB0920w			PFB0920w		PFB0920w	PFB0920w	PFB0920w		PFB0920w	PFB0920w		PFB0920w	PFB0920w		PFB0920w	PFB0920w		PFB0920w
PFB0921c	PFB0921c		PFB0921c	PFB0921c	PFB0921c	PFB0921c			PFB0921c		PFB0921c	PFB0921c	PFB0921c			PFB0921c		PFB0921c	PFB0921c		PFB0921c	PFB0921c		PFB0921c
PFB0923c	PFB0923c	PFB0923c	PFB0923c	PFB0923c	PFB0923c	PFB0923c			PFB0923c		PFB0923c	PFB0923c	PFB0923c	PFB0923c	PFB0923c	PFB0923c		PFB0923c	PFB0923c		PFB0923c	PFB0923c	PFB0923c	PFB0923c
PFB0925w	PFB0925w	PFB0925w	PFB0925w	PFB0925w	PFB0925w	PFB0925w			PFB0925w		PFB0925w	PFB0925w	PFB0925w	PFB0925w	PFB0925w	PFB0925w		PFB0925w	PFB0925w		PFB0925w	PFB0925w	PFB0925w	PFB0925w
PFB0926c	PFB0926c	PFB0926c	PFB0926c	PFB0926c	PFB0926c	PFB0926c			PFB0926c		PFB0926c	PFB0926c	PFB0926c	PFB0926c	PFB0926c	PFB0926c		PFB0926c	PFB0926c		PFB0926c	PFB0926c	PFB0926c	PFB0926c
PFB0930w	PFB0930w		PFB0930w	PFB0930w	PFB0930w	PFB0930w			PFB0930w		PFB0930w	PFB0930w	PFB0930w		PFB0930w	PFB0930w		PFB0930w	PFB0930w		PFB0930w	PFB0930w		PFB0930w
PFB0932w	PFB0932w	PFB0932w	PFB0932w	PFB0932w	PFB0932w				PFB0932w	PFB0932w	PFB0932w	PFB0932w	PFB0932w		PFB0932w			PFB0932w	PFB0932w	PFB0932w	PFB0932w	PFB0932w		PFB0932w
PFB0935w	PFB0935w	PFB0935w	PFB0935w	PFB0935w	PFB0935w	PFB0935w			PFB0935w	PFB0935w	PFB0935w	PFB0935w	PFB0935w	PFB0935w	PFB0935w	PFB0935w	PFB0935w	PFB0935w	PFB0935w		PFB0935w	PFB0935w	PFB0935w	PFB0935w
PFB0946c	PFB0946c		PFB0946c	PFB0946c	PFB0946c	PFB0946c			PFB0946c		PFB0946c	PFB0946c	PFB0946c	PFB0946c	PFB0946c	PFB0946c		PFB0946c	PFB0946c		PFB0946c	PFB0946c	PFB0946c	PFB0946c
PFB0950w	PFB0950w		PFB0950w	PFB0950w	PFB0950w	PFB0950w			PFB0950w		PFB0950w	PFB0950w	PFB0950w	PFB0950w	PFB0950w	PFB0950w		PFB0950w	PFB0950w		PFB0950w	PFB0950w	PFB0950w	PFB0950w
PFB0951w	PFB0951w	PFB0951w	PFB0951w	PFB0951w	PFB0951w	PFB0951w			PFB0951w		PFB0951w	PFB0951w	PFB0951w	PFB0951w	PFB0951w	PFB0951w		PFB0951w	PFB0951w		PFB0951w	PFB0951w	PFB0951w
PFB0953w	PFB0953w		PFB0953w	PFB0953w	PFB0953w	PFB0953w			PFB0953w	PFB0953w	PFB0953w	PFB0953w	PFB0953w	PFB0953w	PFB0953w	PFB0953w	PFB0953w	PFB0953w	PFB0953w		PFB0953w	PFB0953w	PFB0953w	PFB0953w
PFB0955w	PFB0955w	PFB0955w	PFB0955w	PFB0955w	PFB0955w	PFB0955w			PFB0955w		PFB0955w	PFB0955w	PFB0955w		PFB0955w	PFB0955w		PFB0955w	PFB0955w		PFB0955w	PFB0955w		PFB0955w
PFB0960c	PFB0960c	PFB0960c	PFB0960c	PFB0960c	PFB0960c	PFB0960c			PFB0960c	PFB0960c	PFB0960c	PFB0960c	PFB0960c		PFB0960c	PFB0960c		PFB0960c	PFB0960c		PFB0960c	PFB0960c		PFB0960c
PFB0965c	PFB0965c		PFB0965c	PFB0965c	PFB0965c	PFB0965c		PFB0965c	PFB0965c	PFB0965c	PFB0965c	PFB0965c	PFB0965c	PFB0965c	PFB0965c	PFB0965c	PFB0965c	PFB0965c	PFB0965c	PFB0965c	PFB0965c	PFB0965c	PFB0965c	PFB0965c
PFB0970c	PFB0970c	PFB0970c	PFB0970c		PFB0970c	PFB0970c			PFB0970c		PFB0970c	PFB0970c	PFB0970c	PFB0970c	PFB0970c	PFB0970c		PFB0970c	PFB0970c		PFB0970c	PFB0970c	PFB0970c	PFB0970c
PFB0972w	PFB0972w	PFB0972w	PFB0972w		PFB0972w	PFB0972w			PFB0972w		PFB0972w	PFB0972w	PFB0972w	PFB0972w	PFB0972w	PFB0972w		PFB0972w	PFB0972w		PFB0972w	PFB0972w	PFB0972w	PFB0972w
PFB0973c	PFB0973c	PFB0973c	PFB0973c		PFB0973c	PFB0973c			PFB0973c		PFB0973c	PFB0973c	PFB0973c	PFB0973c	PFB0973c	PFB0973c		PFB0973c	PFB0973c	PFB0973c	PFB0973c	PFB0973c	PFB0973c	PFB0973c
PFB0974c	PFB0974c	PFB0974c	PFB0974c		PFB0974c	PFB0974c			PFB0974c		PFB0974c	PFB0974c	PFB0974c	PFB0974c	PFB0974c	PFB0974c		PFB0974c	PFB0974c	PFB0974c	PFB0974c	PFB0974c	PFB0974c	PFB0974c
PFB0975c	PFB0975c	PFB0975c	PFB0975c		PFB0975c	PFB0975c			PFB0975c		PFB0975c	PFB0975c	PFB0975c	PFB0975c	PFB0975c	PFB0975c		PFB0975c	PFB0975c	PFB0975c	PFB0975c	PFB0975c	PFB0975c	PFB0975c
PFB0976w	PFB0976w		PFB0976w	PFB0976w	PFB0976w	PFB0976w			PFB0976w		PFB0976w	PFB0976w	PFB0976w	PFB0976w	PFB0976w	PFB0976w		PFB0976w	PFB0976w	PFB0976w	PFB0976w	PFB0976w	PFB0976w	PFB0976w
PFB0980w	PFB0980w	PFB0980w	PFB0980w		PFB0980w	PFB0980w			PFB0980w		PFB0980w	PFB0980w	PFB0980w	PFB0980w	PFB0980w	PFB0980w		PFB0980w	PFB0980w		PFB0980w	PFB0980w	PFB0980w	PFB0980w
PFB0985c	PFB0985c	PFB0985c	PFB0985c		PFB0985c	PFB0985c	PFB0985c		PFB0985c	PFB0985c	PFB0985c	PFB0985c	PFB0985c	PFB0985c	PFB0985c	PFB0985c		PFB0985c	PFB0985c		PFB0985c	PFB0985c	PFB0985c	PFB0985c
PFB0990c	PFB0990c		PFB0990c		PFB0990c				PFB0990c		PFB0990c	PFB0990c	PFB0990c		PFB0990c	PFB0990c		PFB0990c	PFB0990c		PFB0990c	PFB0990c		PFB0990c
PFB0995w	PFB0995w		PFB0995w		PFB0995w				PFB0995w		PFB0995w	PFB0995w	PFB0995w		PFB0995w	PFB0995w		PFB0995w	PFB0995w		PFB0995w	PFB0995w		PFB0995w
PFB1000w	PFB1000w		PFB1000w	PFB1000w	PFB1000w				PFB1000w		PFB1000w	PFB1000w	PFB1000w		PFB1000w	PFB1000w		PFB1000w	PFB1000w		PFB1000w	PFB1000w		PFB1000w
PFB1005w	PFB1005w	PFB1005w	PFB1005w	PFB1005w	PFB1005w	PFB1005w			PFB1005w		PFB1005w	PFB1005w	PFB1005w		PFB1005w	PFB1005w		PFB1005w	PFB1005w		PFB1005w	PFB1005w		PFB1005w
PFB1010w	PFB1010w	PFB1010w	PFB1010w	PFB1010w	PFB1010w	PFB1010w			PFB1010w		PFB1010w	PFB1010w	PFB1010w	PFB1010w	PFB1010w	PFB1010w		PFB1010w	PFB1010w		PFB1010w	PFB1010w	PFB1010w	PFB1010w
PFB1015w	PFB1015w	PFB1015w	PFB1015w	PFB1015w	PFB1015w	PFB1015w			PFB1015w		PFB1015w	PFB1015w	PFB1015w		PFB1015w	PFB1015w		PFB1015w	PFB1015w		PFB1015w	PFB1015w		PFB1015w
PFB1020w	PFB1020w		PFB1020w	PFB1020w	PFB1020w	PFB1020w			PFB1020w		PFB1020w	PFB1020w	PFB1020w	PFB1020w	PFB1020w	PFB1020w		PFB1020w	PFB1020w		PFB1020w	PFB1020w	PFB1020w	PFB1020w
PFB1025w	PFB1025w		PFB1025w		PFB1025w	PFB1025w	PFB1025w		PFB1025w	PFB1025w	PFB1025w	PFB1025w	PFB1025w	PFB1025w	PFB1025w	PFB1025w		PFB1025w	PFB1025w		PFB1025w		PFB1025w	PFB1025w
PFB1030w	PFB1030w		PFB1030w	PFB1030w	PFB1030w	PFB1030w	PFB1030w		PFB1030w	PFB1030w	PFB1030w	PFB1030w	PFB1030w	PFB1030w	PFB1030w	PFB1030w		PFB1030w	PFB1030w		PFB1030w	PFB1030w	PFB1030w	PFB1030w
PFB1035w	PFB1035w		PFB1035w	PFB1035w	PFB1035w	PFB1035w			PFB1035w		PFB1035w	PFB1035w	PFB1035w	PFB1035w		PFB1035w		PFB1035w	PFB1035w		PFB1035w	PFB1035w	PFB1035w	PFB1035w
PFB1040w	PFB1040w		PFB1040w	PFB1040w	PFB1040w	PFB1040w			PFB1040w	PFB1040w	PFB1040w	PFB1040w	PFB1040w		PFB1040w	PFB1040w	PFB1040w	PFB1040w	PFB1040w		PFB1040w	PFB1040w		PFB1040w
PFB1045w	PFB1045w		PFB1045w	PFB1045w	PFB1045w	PFB1045w			PFB1045w		PFB1045w	PFB1045w	PFB1045w		PFB1045w			PFB1045w			PFB1045w			PFB1045w
PFB1050w	PFB1050w		PFB1050w	PFB1050w	PFB1050w				PFB1050w		PFB1050w	PFB1050w	PFB1050w		PFB1050w	PFB1050w		PFB1050w	PFB1050w		PFB1050w	PFB1050w
PFB1055c	PFB1055c	PFB1055c	PFB1055c	PFB1055c	PFB1055c				PFB1055c	PFB1055c	PFB1055c	PFB1055c	PFB1055c		PFB1055c	PFB1055c	PFB1055c	PFB1055c	PFB1055c		PFB1055c	PFB1055c		PFB1055c
PFC0005w	PFC0005w	PFC0005w	PFC0005w	PFC0005w	PFC0005w	PFC0005w			PFC0005w	PFC0005w	PFC0005w	PFC0005w	PFC0005w	PFC0005w	PFC0005w	PFC0005w	PFC0005w	PFC0005w	PFC0005w		PFC0005w	PFC0005w	PFC0005w	PFC0005w
PFC0010c	PFC0010c		PFC0010c	PFC0010c	PFC0010c				PFC0010c		PFC0010c	PFC0010c	PFC0010c		PFC0010c	PFC0010c		PFC0010c	PFC0010c		PFC0010c	PFC0010c
PFC0015c	PFC0015c		PFC0015c		PFC0015c				PFC0015c		PFC0015c	PFC0015c	PFC0015c	PFC0015c	PFC0015c	PFC0015c		PFC0015c	PFC0015c		PFC0015c		PFC0015c	PFC0015c
PFC0025c	PFC0025c		PFC0025c	PFC0025c	PFC0025c	PFC0025c			PFC0025c		PFC0025c	PFC0025c	PFC0025c		PFC0025c	PFC0025c		PFC0025c	PFC0025c		PFC0025c	PFC0025c		PFC0025c
PFC0030c	PFC0030c	PFC0030c	PFC0030c	PFC0030c	PFC0030c	PFC0030c			PFC0030c		PFC0030c	PFC0030c	PFC0030c		PFC0030c	PFC0030c		PFC0030c	PFC0030c		PFC0030c	PFC0030c		PFC0030c
PFC0035w	PFC0035w	PFC0035w	PFC0035w	PFC0035w	PFC0035w	PFC0035w			PFC0035w		PFC0035w	PFC0035w	PFC0035w		PFC0035w	PFC0035w		PFC0035w	PFC0035w		PFC0035w	PFC0035w		PFC0035w
PFC0040w	PFC0040w		PFC0040w	PFC0040w	PFC0040w				PFC0040w		PFC0040w	PFC0040w	PFC0040w			PFC0040w		PFC0040w	PFC0040w	PFC0040w	PFC0040w	PFC0040w		PFC0040w
PFC0045w	PFC0045w		PFC0045w		PFC0045w	PFC0045w		PFC0045w	PFC0045w	PFC0045w	PFC0045w	PFC0045w	PFC0045w		PFC0045w	PFC0045w	PFC0045w	PFC0045w	PFC0045w		PFC0045w	PFC0045w
PFC0050c	PFC0050c		PFC0050c	PFC0050c	PFC0050c	PFC0050c			PFC0050c	PFC0050c	PFC0050c	PFC0050c			PFC0050c	PFC0050c		PFC0050c	PFC0050c		PFC0050c	PFC0050c		PFC0050c
PFC0055w	PFC0055w	PFC0055w	PFC0055w		PFC0055w	PFC0055w			PFC0055w	PFC0055w	PFC0055w	PFC0055w	PFC0055w	PFC0055w	PFC0055w	PFC0055w		PFC0055w	PFC0055w		PFC0055w	PFC0055w	PFC0055w	PFC0055w
PFC0060c	PFC0060c	PFC0060c	PFC0060c		PFC0060c				PFC0060c		PFC0060c	PFC0060c	PFC0060c		PFC0060c			PFC0060c	PFC0060c		PFC0060c	PFC0060c		PFC0060c
PFC0065c	PFC0065c		PFC0065c	PFC0065c	PFC0065c	PFC0065c			PFC0065c	PFC0065c	PFC0065c	PFC0065c	PFC0065c	PFC0065c	PFC0065c	PFC0065c		PFC0065c	PFC0065c		PFC0065c	PFC0065c	PFC0065c	PFC0065c
PFC0070c	PFC0070c		PFC0070c		PFC0070c	PFC0070c			PFC0070c	PFC0070c	PFC0070c	PFC0070c	PFC0070c	PFC0070c	PFC0070c			PFC0070c	PFC0070c		PFC0070c	PFC0070c	PFC0070c	PFC0070c
PFC0075c	PFC0075c		PFC0075c	PFC0075c	PFC0075c	PFC0075c			PFC0075c		PFC0075c	PFC0075c	PFC0075c		PFC0075c			PFC0075c	PFC0075c	PFC0075c	PFC0075c	PFC0075c		PFC0075c
PFC0080c	PFC0080c		PFC0080c	PFC0080c	PFC0080c	PFC0080c			PFC0080c		PFC0080c	PFC0080c	PFC0080c			PFC0080c		PFC0080c	PFC0080c		PFC0080c	PFC0080c		PFC0080c
PFC0085c	PFC0085c		PFC0085c		PFC0085c	PFC0085c			PFC0085c		PFC0085c	PFC0085c	PFC0085c	PFC0085c	PFC0085c			PFC0085c	PFC0085c		PFC0085c	PFC0085c	PFC0085c	PFC0085c
PFC0090w	PFC0090w		PFC0090w	PFC0090w	PFC0090w	PFC0090w			PFC0090w		PFC0090w	PFC0090w	PFC0090w	PFC0090w	PFC0090w	PFC0090w		PFC0090w	PFC0090w	PFC0090w	PFC0090w	PFC0090w	PFC0090w	PFC0090w
PFC0095c	PFC0095c		PFC0095c	PFC0095c	PFC0095c						PFC0095c	PFC0095c	PFC0095c			PFC0095c		PFC0095c	PFC0095c		PFC0095c	PFC0095c		PFC0095c
PFC0100c	PFC0100c		PFC0100c		PFC0100c	PFC0100c			PFC0100c		PFC0100c	PFC0100c	PFC0100c		PFC0100c	PFC0100c		PFC0100c	PFC0100c		PFC0100c	PFC0100c		PFC0100c
PFC0105w	PFC0105w		PFC0105w	PFC0105w	PFC0105w	PFC0105w			PFC0105w		PFC0105w	PFC0105w	PFC0105w	PFC0105w	PFC0105w	PFC0105w		PFC0105w	PFC0105w	PFC0105w	PFC0105w	PFC0105w	PFC0105w	PFC0105w
PFC0110w	PFC0110w	PFC0110w	PFC0110w	PFC0110w	PFC0110w				PFC0110w	PFC0110w	PFC0110w	PFC0110w	PFC0110w	PFC0110w	PFC0110w			PFC0110w	PFC0110w		PFC0110w	PFC0110w	PFC0110w	PFC0110w
PFC0115c	PFC0115c	PFC0115c	PFC0115c	PFC0115c	PFC0115c	PFC0115c			PFC0115c		PFC0115c	PFC0115c	PFC0115c		PFC0115c	PFC0115c		PFC0115c	PFC0115c	PFC0115c	PFC0115c	PFC0115c		PFC0115c
PFC0120w	PFC0120w	PFC0120w	PFC0120w		PFC0120w	PFC0120w			PFC0120w	PFC0120w	PFC0120w	PFC0120w	PFC0120w		PFC0120w	PFC0120w		PFC0120w	PFC0120w		PFC0120w	PFC0120w		PFC0120w
PFC0125w	PFC0125w		PFC0125w		PFC0125w				PFC0125w		PFC0125w	PFC0125w	PFC0125w		PFC0125w			PFC0125w	PFC0125w		PFC0125w	PFC0125w		PFC0125w
PFC0126c	PFC0126c		PFC0126c		PFC0126c	PFC0126c			PFC0126c		PFC0126c	PFC0126c	PFC0126c		PFC0126c	PFC0126c		PFC0126c			PFC0126c			PFC0126c
PFC0130c	PFC0130c	PFC0130c	PFC0130c	PFC0130c	PFC0130c	PFC0130c			PFC0130c		PFC0130c	PFC0130c	PFC0130c	PFC0130c		PFC0130c		PFC0130c	PFC0130c		PFC0130c	PFC0130c	PFC0130c	PFC0130c
PFC0135c	PFC0135c		PFC0135c	PFC0135c	PFC0135c	PFC0135c			PFC0135c		PFC0135c	PFC0135c		PFC0135c	PFC0135c	PFC0135c		PFC0135c	PFC0135c		PFC0135c	PFC0135c	PFC0135c
PFC0140c	PFC0140c		PFC0140c		PFC0140c	PFC0140c			PFC0140c		PFC0140c	PFC0140c	PFC0140c		PFC0140c	PFC0140c		PFC0140c	PFC0140c		PFC0140c			PFC0140c
PFC0145c	PFC0145c		PFC0145c		PFC0145c	PFC0145c			PFC0145c	PFC0145c	PFC0145c	PFC0145c	PFC0145c	PFC0145c		PFC0145c		PFC0145c	PFC0145c		PFC0145c	PFC0145c	PFC0145c	PFC0145c
PFC0150w	PFC0150w		PFC0150w	PFC0150w	PFC0150w	PFC0150w				PFC0150w	PFC0150w	PFC0150w	PFC0150w	PFC0150w				PFC0150w	PFC0150w		PFC0150w	PFC0150w	PFC0150w	PFC0150w
PFC0155c	PFC0155c		PFC0155c	PFC0155c	PFC0155c	PFC0155c	PFC0155c		PFC0155c	PFC0155c	PFC0155c	PFC0155c	PFC0155c		PFC0155c	PFC0155c		PFC0155c	PFC0155c		PFC0155c	PFC0155c		PFC0155c
PFC0160w	PFC0160w		PFC0160w	PFC0160w	PFC0160w	PFC0160w	PFC0160w		PFC0160w	PFC0160w	PFC0160w	PFC0160w	PFC0160w	PFC0160w	PFC0160w	PFC0160w	PFC0160w	PFC0160w	PFC0160w		PFC0160w	PFC0160w	PFC0160w	PFC0160w
PFC0165w	PFC0165w		PFC0165w	PFC0165w	PFC0165w	PFC0165w	PFC0165w		PFC0165w		PFC0165w	PFC0165w	PFC0165w	PFC0165w	PFC0165w	PFC0165w		PFC0165w	PFC0165w		PFC0165w	PFC0165w	PFC0165w	PFC0165w
PFC0166w	PFC0166w		PFC0166w		PFC0166w	PFC0166w					PFC0166w	PFC0166w	PFC0166w	PFC0166w	PFC0166w			PFC0166w	PFC0166w		PFC0166w	PFC0166w	PFC0166w
PFC0170c	PFC0170c		PFC0170c	PFC0170c	PFC0170c	PFC0170c			PFC0170c	PFC0170c	PFC0170c	PFC0170c	PFC0170c	PFC0170c	PFC0170c	PFC0170c		PFC0170c	PFC0170c		PFC0170c	PFC0170c	PFC0170c	PFC0170c
PFC0175w	PFC0175w		PFC0175w	PFC0175w	PFC0175w	PFC0175w			PFC0175w	PFC0175w	PFC0175w	PFC0175w	PFC0175w	PFC0175w	PFC0175w	PFC0175w		PFC0175w	PFC0175w		PFC0175w	PFC0175w	PFC0175w	PFC0175w
PFC0176c	PFC0176c		PFC0176c	PFC0176c	PFC0176c	PFC0176c					PFC0176c	PFC0176c	PFC0176c		PFC0176c	PFC0176c		PFC0176c	PFC0176c		PFC0176c	PFC0176c		PFC0176c
PFC0180c	PFC0180c		PFC0180c	PFC0180c	PFC0180c	PFC0180c		PFC0180c	PFC0180c	PFC0180c	PFC0180c	PFC0180c	PFC0180c		PFC0180c	PFC0180c	PFC0180c	PFC0180c	PFC0180c		PFC0180c	PFC0180c		PFC0180c
PFC0185w	PFC0185w		PFC0185w	PFC0185w	PFC0185w	PFC0185w		PFC0185w	PFC0185w	PFC0185w	PFC0185w	PFC0185w	PFC0185w	PFC0185w	PFC0185w	PFC0185w	PFC0185w	PFC0185w	PFC0185w		PFC0185w	PFC0185w	PFC0185w	PFC0185w
PFC0190c	PFC0190c		PFC0190c	PFC0190c	PFC0190c	PFC0190c			PFC0190c		PFC0190c	PFC0190c	PFC0190c	PFC0190c	PFC0190c	PFC0190c		PFC0190c	PFC0190c		PFC0190c	PFC0190c	PFC0190c	PFC0190c
PFC0191c	PFC0191c		PFC0191c		PFC0191c				PFC0191c		PFC0191c	PFC0191c	PFC0191c		PFC0191c			PFC0191c	PFC0191c		PFC0191c	PFC0191c
PFC0195w	PFC0195w		PFC0195w		PFC0195w	PFC0195w			PFC0195w		PFC0195w	PFC0195w	PFC0195w		PFC0195w	PFC0195w		PFC0195w	PFC0195w		PFC0195w	PFC0195w		PFC0195w
PFC0200w	PFC0200w		PFC0200w		PFC0200w	PFC0200w	PFC0200w		PFC0200w		PFC0200w	PFC0200w	PFC0200w		PFC0200w			PFC0200w	PFC0200w		PFC0200w	PFC0200w
PFC0205c	PFC0205c		PFC0205c	PFC0205c	PFC0205c	PFC0205c				PFC0205c	PFC0205c	PFC0205c	PFC0205c	PFC0205c	PFC0205c	PFC0205c		PFC0205c	PFC0205c	PFC0205c	PFC0205c	PFC0205c	PFC0205c	PFC0205c
PFC0210c	PFC0210c	PFC0210c	PFC0210c	PFC0210c	PFC0210c	PFC0210c	PFC0210c		PFC0210c	PFC0210c	PFC0210c	PFC0210c		PFC0210c	PFC0210c	PFC0210c		PFC0210c	PFC0210c		PFC0210c	PFC0210c	PFC0210c	PFC0210c
PFC0215c	PFC0215c		PFC0215c	PFC0215c	PFC0215c	PFC0215c			PFC0215c		PFC0215c	PFC0215c	PFC0215c	PFC0215c	PFC0215c	PFC0215c		PFC0215c	PFC0215c	PFC0215c	PFC0215c	PFC0215c	PFC0215c	PFC0215c
PFC0220w	PFC0220w		PFC0220w	PFC0220w	PFC0220w	PFC0220w			PFC0220w		PFC0220w	PFC0220w	PFC0220w	PFC0220w	PFC0220w	PFC0220w		PFC0220w	PFC0220w	PFC0220w	PFC0220w	PFC0220w	PFC0220w	PFC0220w
PFC0221c	PFC0221c		PFC0221c	PFC0221c	PFC0221c	PFC0221c			PFC0221c	PFC0221c	PFC0221c	PFC0221c	PFC0221c		PFC0221c			PFC0221c	PFC0221c		PFC0221c	PFC0221c		PFC0221c
PFC0225c	PFC0225c		PFC0225c		PFC0225c				PFC0225c	PFC0225c	PFC0225c	PFC0225c	PFC0225c		PFC0225c		PFC0225c	PFC0225c	PFC0225c		PFC0225c	PFC0225c		PFC0225c
PFC0230c	PFC0230c		PFC0230c	PFC0230c	PFC0230c	PFC0230c			PFC0230c	PFC0230c	PFC0230c	PFC0230c	PFC0230c	PFC0230c	PFC0230c	PFC0230c	PFC0230c	PFC0230c	PFC0230c	PFC0230c	PFC0230c	PFC0230c	PFC0230c	PFC0230c
PFC0235w	PFC0235w		PFC0235w	PFC0235w	PFC0235w	PFC0235w			PFC0235w	PFC0235w	PFC0235w	PFC0235w	PFC0235w	PFC0235w	PFC0235w	PFC0235w	PFC0235w	PFC0235w	PFC0235w		PFC0235w	PFC0235w	PFC0235w	PFC0235w
PFC0240c	PFC0240c		PFC0240c	PFC0240c	PFC0240c	PFC0240c			PFC0240c		PFC0240c	PFC0240c	PFC0240c	PFC0240c	PFC0240c			PFC0240c	PFC0240c		PFC0240c	PFC0240c	PFC0240c	PFC0240c
PFC0241w	PFC0241w		PFC0241w	PFC0241w	PFC0241w	PFC0241w			PFC0241w		PFC0241w	PFC0241w	PFC0241w	PFC0241w	PFC0241w			PFC0241w	PFC0241w		PFC0241w	PFC0241w	PFC0241w	PFC0241w
PFC0245c	PFC0245c		PFC0245c	PFC0245c	PFC0245c			PFC0245c	PFC0245c		PFC0245c	PFC0245c	PFC0245c	PFC0245c	PFC0245c	PFC0245c		PFC0245c	PFC0245c		PFC0245c	PFC0245c	PFC0245c	PFC0245c
PFC0250c	PFC0250c		PFC0250c		PFC0250c				PFC0250c		PFC0250c	PFC0250c		PFC0250c				PFC0250c	PFC0250c		PFC0250c	PFC0250c	PFC0250c	PFC0250c
PFC0255c	PFC0255c		PFC0255c		PFC0255c	PFC0255c		PFC0255c	PFC0255c		PFC0255c	PFC0255c	PFC0255c	PFC0255c	PFC0255c	PFC0255c		PFC0255c	PFC0255c		PFC0255c	PFC0255c	PFC0255c	PFC0255c
PFC0260w	PFC0260w		PFC0260w		PFC0260w	PFC0260w		PFC0260w	PFC0260w		PFC0260w	PFC0260w	PFC0260w	PFC0260w	PFC0260w	PFC0260w		PFC0260w	PFC0260w		PFC0260w	PFC0260w	PFC0260w	PFC0260w
PFC0261c	PFC0261c		PFC0261c	PFC0261c	PFC0261c	PFC0261c			PFC0261c	PFC0261c	PFC0261c	PFC0261c	PFC0261c	PFC0261c	PFC0261c	PFC0261c		PFC0261c	PFC0261c		PFC0261c	PFC0261c	PFC0261c	PFC0261c
PFC0262c	PFC0262c		PFC0262c	PFC0262c	PFC0262c	PFC0262c			PFC0262c		PFC0262c	PFC0262c	PFC0262c		PFC0262c			PFC0262c	PFC0262c		PFC0262c	PFC0262c		PFC0262c
PFC0265c	PFC0265c		PFC0265c	PFC0265c	PFC0265c	PFC0265c			PFC0265c		PFC0265c	PFC0265c	PFC0265c	PFC0265c	PFC0265c	PFC0265c		PFC0265c	PFC0265c	PFC0265c	PFC0265c	PFC0265c	PFC0265c	PFC0265c
PFC0270w	PFC0270w		PFC0270w	PFC0270w	PFC0270w	PFC0270w			PFC0270w		PFC0270w	PFC0270w	PFC0270w	PFC0270w	PFC0270w	PFC0270w		PFC0270w	PFC0270w		PFC0270w	PFC0270w	PFC0270w	PFC0270w
PFC0271c	PFC0271c		PFC0271c		PFC0271c	PFC0271c			PFC0271c		PFC0271c	PFC0271c	PFC0271c		PFC0271c	PFC0271c		PFC0271c	PFC0271c		PFC0271c	PFC0271c		PFC0271c
PFC0275w	PFC0275w		PFC0275w		PFC0275w	PFC0275w			PFC0275w		PFC0275w	PFC0275w	PFC0275w	PFC0275w	PFC0275w	PFC0275w		PFC0275w	PFC0275w		PFC0275w	PFC0275w	PFC0275w	PFC0275w
PFC0280c	PFC0280c		PFC0280c	PFC0280c	PFC0280c	PFC0280c			PFC0280c		PFC0280c	PFC0280c	PFC0280c	PFC0280c	PFC0280c	PFC0280c		PFC0280c	PFC0280c		PFC0280c	PFC0280c	PFC0280c	PFC0280c
PFC0281w	PFC0281w	PFC0281w	PFC0281w		PFC0281w	PFC0281w	PFC0281w		PFC0281w		PFC0281w	PFC0281w	PFC0281w	PFC0281w	PFC0281w	PFC0281w		PFC0281w	PFC0281w		PFC0281w		PFC0281w	PFC0281w
PFC0282w	PFC0282w		PFC0282w	PFC0282w	PFC0282w	PFC0282w			PFC0282w		PFC0282w	PFC0282w	PFC0282w		PFC0282w	PFC0282w		PFC0282w	PFC0282w		PFC0282w	PFC0282w		PFC0282w
PFC0285c	PFC0285c	PFC0285c	PFC0285c	PFC0285c	PFC0285c	PFC0285c			PFC0285c		PFC0285c	PFC0285c	PFC0285c	PFC0285c	PFC0285c	PFC0285c		PFC0285c	PFC0285c	PFC0285c	PFC0285c	PFC0285c	PFC0285c	PFC0285c
PFC0290w	PFC0290w		PFC0290w		PFC0290w	PFC0290w			PFC0290w		PFC0290w	PFC0290w	PFC0290w	PFC0290w	PFC0290w	PFC0290w		PFC0290w	PFC0290w	PFC0290w	PFC0290w	PFC0290w	PFC0290w	PFC0290w
PFC0295c	PFC0295c		PFC0295c	PFC0295c	PFC0295c		PFC0295c			PFC0295c	PFC0295c	PFC0295c	PFC0295c		PFC0295c			PFC0295c	PFC0295c		PFC0295c	PFC0295c		PFC0295c
PFC0300c	PFC0300c		PFC0300c	PFC0300c	PFC0300c				PFC0300c		PFC0300c	PFC0300c	PFC0300c	PFC0300c	PFC0300c			PFC0300c	PFC0300c		PFC0300c	PFC0300c	PFC0300c	PFC0300c
PFC0305w	PFC0305w		PFC0305w	PFC0305w	PFC0305w		PFC0305w		PFC0305w		PFC0305w	PFC0305w	PFC0305w	PFC0305w	PFC0305w			PFC0305w	PFC0305w		PFC0305w	PFC0305w	PFC0305w	PFC0305w
PFC0310c	PFC0310c		PFC0310c	PFC0310c	PFC0310c						PFC0310c	PFC0310c		PFC0310c	PFC0310c	PFC0310c		PFC0310c	PFC0310c		PFC0310c	PFC0310c	PFC0310c	PFC0310c
PFC0315c	PFC0315c		PFC0315c	PFC0315c	PFC0315c				PFC0315c	PFC0315c	PFC0315c	PFC0315c	PFC0315c		PFC0315c			PFC0315c	PFC0315c		PFC0315c	PFC0315c		PFC0315c
PFC0320w	PFC0320w		PFC0320w	PFC0320w	PFC0320w				PFC0320w	PFC0320w	PFC0320w	PFC0320w	PFC0320w		PFC0320w			PFC0320w	PFC0320w		PFC0320w	PFC0320w		PFC0320w
PFC0325c	PFC0325c		PFC0325c		PFC0325c	PFC0325c			PFC0325c	PFC0325c	PFC0325c	PFC0325c	PFC0325c	PFC0325c	PFC0325c	PFC0325c		PFC0325c	PFC0325c		PFC0325c		PFC0325c	PFC0325c
PFC0330w	PFC0330w		PFC0330w		PFC0330w	PFC0330w			PFC0330w	PFC0330w	PFC0330w	PFC0330w	PFC0330w	PFC0330w	PFC0330w	PFC0330w		PFC0330w	PFC0330w		PFC0330w		PFC0330w	PFC0330w
PFC0335c	PFC0335c		PFC0335c	PFC0335c	PFC0335c	PFC0335c			PFC0335c		PFC0335c	PFC0335c	PFC0335c	PFC0335c	PFC0335c	PFC0335c		PFC0335c	PFC0335c	PFC0335c	PFC0335c	PFC0335c	PFC0335c	PFC0335c
PFC0340w	PFC0340w		PFC0340w	PFC0340w	PFC0340w	PFC0340w			PFC0340w		PFC0340w	PFC0340w	PFC0340w	PFC0340w	PFC0340w	PFC0340w		PFC0340w	PFC0340w	PFC0340w	PFC0340w	PFC0340w	PFC0340w	PFC0340w
PFC0345w	PFC0345w		PFC0345w	PFC0345w	PFC0345w				PFC0345w	PFC0345w	PFC0345w	PFC0345w	PFC0345w		PFC0345w	PFC0345w		PFC0345w	PFC0345w		PFC0345w	PFC0345w		PFC0345w
PFC0350c	PFC0350c		PFC0350c		PFC0350c				PFC0350c	PFC0350c	PFC0350c	PFC0350c	PFC0350c	PFC0350c	PFC0350c	PFC0350c		PFC0350c	PFC0350c		PFC0350c	PFC0350c	PFC0350c	PFC0350c
PFC0355c	PFC0355c		PFC0355c	PFC0355c	PFC0355c	PFC0355c	PFC0355c	PFC0355c	PFC0355c	PFC0355c	PFC0355c	PFC0355c	PFC0355c	PFC0355c	PFC0355c	PFC0355c	PFC0355c	PFC0355c	PFC0355c	PFC0355c	PFC0355c	PFC0355c	PFC0355c	PFC0355c
PFC0360w	PFC0360w		PFC0360w	PFC0360w	PFC0360w	PFC0360w	PFC0360w	PFC0360w	PFC0360w	PFC0360w	PFC0360w	PFC0360w	PFC0360w		PFC0360w	PFC0360w		PFC0360w	PFC0360w	PFC0360w	PFC0360w	PFC0360w		PFC0360w
PFC0365w	PFC0365w		PFC0365w	PFC0365w	PFC0365w	PFC0365w	PFC0365w		PFC0365w		PFC0365w	PFC0365w	PFC0365w		PFC0365w	PFC0365w		PFC0365w	PFC0365w		PFC0365w	PFC0365w		PFC0365w
PFC0370w	PFC0370w	PFC0370w	PFC0370w	PFC0370w	PFC0370w	PFC0370w			PFC0370w		PFC0370w	PFC0370w	PFC0370w	PFC0370w		PFC0370w		PFC0370w	PFC0370w	PFC0370w	PFC0370w	PFC0370w	PFC0370w	PFC0370w
PFC0371w	PFC0371w		PFC0371w		PFC0371w						PFC0371w	PFC0371w		PFC0371w	PFC0371w	PFC0371w		PFC0371w	PFC0371w		PFC0371w	PFC0371w	PFC0371w	PFC0371w
PFC0375c	PFC0375c		PFC0375c	PFC0375c	PFC0375c				PFC0375c		PFC0375c	PFC0375c	PFC0375c		PFC0375c	PFC0375c			PFC0375c					PFC0375c
PFC0380w	PFC0380w		PFC0380w	PFC0380w	PFC0380w				PFC0380w		PFC0380w	PFC0380w	PFC0380w		PFC0380w	PFC0380w			PFC0380w					PFC0380w
PFC0381c	PFC0381c	PFC0381c	PFC0381c		PFC0381c				PFC0381c		PFC0381c	PFC0381c	PFC0381c					PFC0381c	PFC0381c		PFC0381c			PFC0381c
PFC0385c	PFC0385c	PFC0385c	PFC0385c	PFC0385c	PFC0385c	PFC0385c			PFC0385c	PFC0385c	PFC0385c	PFC0385c	PFC0385c	PFC0385c	PFC0385c	PFC0385c	PFC0385c	PFC0385c	PFC0385c		PFC0385c	PFC0385c	PFC0385c	PFC0385c
PFC0390w	PFC0390w	PFC0390w	PFC0390w	PFC0390w	PFC0390w	PFC0390w			PFC0390w	PFC0390w	PFC0390w	PFC0390w	PFC0390w		PFC0390w	PFC0390w	PFC0390w	PFC0390w	PFC0390w		PFC0390w	PFC0390w		PFC0390w
PFC0395w	PFC0395w		PFC0395w	PFC0395w	PFC0395w	PFC0395w			PFC0395w		PFC0395w	PFC0395w	PFC0395w		PFC0395w	PFC0395w		PFC0395w	PFC0395w		PFC0395w	PFC0395w		PFC0395w
PFC0400w	PFC0400w		PFC0400w	PFC0400w	PFC0400w	PFC0400w			PFC0400w	PFC0400w	PFC0400w	PFC0400w	PFC0400w		PFC0400w	PFC0400w	PFC0400w	PFC0400w	PFC0400w		PFC0400w	PFC0400w		PFC0400w
PFC0405c	PFC0405c	PFC0405c	PFC0405c	PFC0405c	PFC0405c				PFC0405c		PFC0405c	PFC0405c						PFC0405c	PFC0405c	PFC0405c	PFC0405c	PFC0405c		PFC0405c
PFC0410w	PFC0410w	PFC0410w	PFC0410w	PFC0410w	PFC0410w				PFC0410w		PFC0410w	PFC0410w						PFC0410w	PFC0410w	PFC0410w	PFC0410w	PFC0410w		PFC0410w
PFC0415c	PFC0415c	PFC0415c	PFC0415c	PFC0415c	PFC0415c				PFC0415c		PFC0415c	PFC0415c	PFC0415c	PFC0415c	PFC0415c	PFC0415c		PFC0415c	PFC0415c	PFC0415c	PFC0415c	PFC0415c	PFC0415c	PFC0415c
PFC0416w	PFC0416w		PFC0416w	PFC0416w	PFC0416w				PFC0416w		PFC0416w	PFC0416w	PFC0416w	PFC0416w	PFC0416w	PFC0416w		PFC0416w	PFC0416w		PFC0416w	PFC0416w	PFC0416w	PFC0416w
PFC0420w	PFC0420w	PFC0420w	PFC0420w	PFC0420w	PFC0420w	PFC0420w			PFC0420w		PFC0420w	PFC0420w	PFC0420w	PFC0420w	PFC0420w			PFC0420w	PFC0420w	PFC0420w	PFC0420w	PFC0420w	PFC0420w	PFC0420w
PFC0425w	PFC0425w	PFC0425w	PFC0425w	PFC0425w	PFC0425w	PFC0425w	PFC0425w	PFC0425w	PFC0425w		PFC0425w	PFC0425w	PFC0425w		PFC0425w	PFC0425w		PFC0425w	PFC0425w		PFC0425w	PFC0425w		PFC0425w
PFC0430w	PFC0430w		PFC0430w		PFC0430w	PFC0430w			PFC0430w	PFC0430w	PFC0430w	PFC0430w	PFC0430w	PFC0430w	PFC0430w		PFC0430w	PFC0430w	PFC0430w		PFC0430w	PFC0430w	PFC0430w	PFC0430w
PFC0435w	PFC0435w		PFC0435w		PFC0435w	PFC0435w			PFC0435w		PFC0435w	PFC0435w	PFC0435w	PFC0435w	PFC0435w	PFC0435w		PFC0435w	PFC0435w		PFC0435w	PFC0435w	PFC0435w	PFC0435w
PFC0440c	PFC0440c		PFC0440c	PFC0440c	PFC0440c	PFC0440c			PFC0440c		PFC0440c	PFC0440c	PFC0440c		PFC0440c	PFC0440c		PFC0440c	PFC0440c	PFC0440c	PFC0440c	PFC0440c		PFC0440c
PFC0441c	PFC0441c		PFC0441c		PFC0441c						PFC0441c	PFC0441c	PFC0441c		PFC0441c				PFC0441c
PFC0445w	PFC0445w		PFC0445w		PFC0445w						PFC0445w	PFC0445w	PFC0445w		PFC0445w				PFC0445w
PFC0450w	PFC0450w		PFC0450w		PFC0450w	PFC0450w					PFC0450w	PFC0450w	PFC0450w	PFC0450w	PFC0450w	PFC0450w		PFC0450w	PFC0450w		PFC0450w	PFC0450w	PFC0450w
PFC0455w	PFC0455w		PFC0455w	PFC0455w	PFC0455w	PFC0455w			PFC0455w		PFC0455w	PFC0455w	PFC0455w	PFC0455w	PFC0455w	PFC0455w		PFC0455w	PFC0455w	PFC0455w	PFC0455w	PFC0455w	PFC0455w	PFC0455w
PFC0460w	PFC0460w		PFC0460w	PFC0460w	PFC0460w		PFC0460w		PFC0460w		PFC0460w	PFC0460w	PFC0460w		PFC0460w	PFC0460w		PFC0460w	PFC0460w	PFC0460w	PFC0460w	PFC0460w		PFC0460w
PFC0465c	PFC0465c		PFC0465c	PFC0465c	PFC0465c	PFC0465c			PFC0465c		PFC0465c	PFC0465c	PFC0465c		PFC0465c	PFC0465c		PFC0465c	PFC0465c	PFC0465c	PFC0465c	PFC0465c		PFC0465c
PFC0470w	PFC0470w		PFC0470w	PFC0470w	PFC0470w	PFC0470w			PFC0470w		PFC0470w	PFC0470w	PFC0470w		PFC0470w	PFC0470w		PFC0470w	PFC0470w	PFC0470w	PFC0470w	PFC0470w		PFC0470w
PFC0475c	PFC0475c		PFC0475c	PFC0475c	PFC0475c				PFC0475c	PFC0475c	PFC0475c	PFC0475c	PFC0475c	PFC0475c	PFC0475c	PFC0475c		PFC0475c	PFC0475c		PFC0475c	PFC0475c	PFC0475c	PFC0475c
PFC0485w	PFC0485w	PFC0485w	PFC0485w	PFC0485w	PFC0485w	PFC0485w			PFC0485w	PFC0485w	PFC0485w	PFC0485w	PFC0485w	PFC0485w	PFC0485w	PFC0485w	PFC0485w	PFC0485w	PFC0485w		PFC0485w	PFC0485w	PFC0485w	PFC0485w
PFC0486c	PFC0486c	PFC0486c	PFC0486c	PFC0486c	PFC0486c	PFC0486c			PFC0486c		PFC0486c	PFC0486c	PFC0486c	PFC0486c	PFC0486c			PFC0486c	PFC0486c		PFC0486c	PFC0486c	PFC0486c	PFC0486c
PFC0490w	PFC0490w		PFC0490w	PFC0490w	PFC0490w	PFC0490w			PFC0490w		PFC0490w	PFC0490w	PFC0490w	PFC0490w	PFC0490w			PFC0490w	PFC0490w		PFC0490w	PFC0490w	PFC0490w
PFC0495w	PFC0495w		PFC0495w		PFC0495w				PFC0495w		PFC0495w	PFC0495w			PFC0495w			PFC0495w	PFC0495w		PFC0495w
PFC0500w	PFC0500w		PFC0500w	PFC0500w	PFC0500w				PFC0500w	PFC0500w	PFC0500w	PFC0500w	PFC0500w		PFC0500w		PFC0500w	PFC0500w	PFC0500w		PFC0500w	PFC0500w		PFC0500w
PFC0505c	PFC0505c		PFC0505c		PFC0505c				PFC0505c		PFC0505c	PFC0505c	PFC0505c	PFC0505c	PFC0505c	PFC0505c		PFC0505c	PFC0505c	PFC0505c	PFC0505c	PFC0505c	PFC0505c	PFC0505c
PFC0506w	PFC0506w		PFC0506w		PFC0506w						PFC0506w	PFC0506w	PFC0506w		PFC0506w	PFC0506w		PFC0506w		PFC0506w	PFC0506w	PFC0506w		PFC0506w
PFC0510w	PFC0510w		PFC0510w		PFC0510w	PFC0510w			PFC0510w		PFC0510w	PFC0510w	PFC0510w	PFC0510w	PFC0510w	PFC0510w		PFC0510w	PFC0510w		PFC0510w	PFC0510w	PFC0510w	PFC0510w
PFC0515c	PFC0515c		PFC0515c		PFC0515c	PFC0515c			PFC0515c	PFC0515c	PFC0515c	PFC0515c	PFC0515c		PFC0515c	PFC0515c		PFC0515c	PFC0515c		PFC0515c			PFC0515c
PFC0520w	PFC0520w		PFC0520w		PFC0520w	PFC0520w			PFC0520w	PFC0520w	PFC0520w	PFC0520w	PFC0520w		PFC0520w	PFC0520w		PFC0520w	PFC0520w		PFC0520w			PFC0520w
PFC0525c	PFC0525c		PFC0525c	PFC0525c	PFC0525c	PFC0525c			PFC0525c	PFC0525c	PFC0525c	PFC0525c		PFC0525c	PFC0525c	PFC0525c		PFC0525c	PFC0525c	PFC0525c	PFC0525c	PFC0525c	PFC0525c	PFC0525c
PFC0530w	PFC0530w		PFC0530w	PFC0530w	PFC0530w	PFC0530w			PFC0530w	PFC0530w	PFC0530w	PFC0530w		PFC0530w	PFC0530w	PFC0530w		PFC0530w	PFC0530w		PFC0530w	PFC0530w	PFC0530w	PFC0530w
PFC0535w	PFC0535w		PFC0535w	PFC0535w	PFC0535w	PFC0535w			PFC0535w		PFC0535w	PFC0535w	PFC0535w		PFC0535w	PFC0535w		PFC0535w	PFC0535w		PFC0535w	PFC0535w		PFC0535w
PFC0540w	PFC0540w		PFC0540w		PFC0540w	PFC0540w			PFC0540w		PFC0540w	PFC0540w	PFC0540w	PFC0540w	PFC0540w			PFC0540w	PFC0540w	PFC0540w	PFC0540w	PFC0540w	PFC0540w
PFC0545c	PFC0545c		PFC0545c		PFC0545c					PFC0545c	PFC0545c	PFC0545c	PFC0545c		PFC0545c		PFC0545c	PFC0545c	PFC0545c		PFC0545c	PFC0545c		PFC0545c
PFC0550w	PFC0550w		PFC0550w		PFC0550w					PFC0550w	PFC0550w	PFC0550w	PFC0550w		PFC0550w		PFC0550w	PFC0550w	PFC0550w		PFC0550w	PFC0550w		PFC0550w
PFC0555c	PFC0555c		PFC0555c	PFC0555c	PFC0555c	PFC0555c					PFC0555c	PFC0555c	PFC0555c		PFC0555c	PFC0555c		PFC0555c	PFC0555c		PFC0555c	PFC0555c		PFC0555c
PFC0556c	PFC0556c		PFC0556c	PFC0556c	PFC0556c	PFC0556c					PFC0556c	PFC0556c	PFC0556c		PFC0556c	PFC0556c		PFC0556c	PFC0556c		PFC0556c	PFC0556c		PFC0556c
PFC0560c	PFC0560c		PFC0560c	PFC0560c	PFC0560c				PFC0560c		PFC0560c	PFC0560c			PFC0560c	PFC0560c		PFC0560c	PFC0560c		PFC0560c	PFC0560c		PFC0560c
PFC0565w	PFC0565w		PFC0565w	PFC0565w	PFC0565w				PFC0565w		PFC0565w	PFC0565w			PFC0565w	PFC0565w		PFC0565w	PFC0565w		PFC0565w	PFC0565w		PFC0565w
PFC0570c	PFC0570c				PFC0570c				PFC0570c		PFC0570c	PFC0570c	PFC0570c	PFC0570c				PFC0570c	PFC0570c		PFC0570c	PFC0570c	PFC0570c
PFC0571c	PFC0571c		PFC0571c		PFC0571c						PFC0571c	PFC0571c	PFC0571c					PFC0571c	PFC0571c		PFC0571c	PFC0571c		PFC0571c
PFC0575w	PFC0575w		PFC0575w		PFC0575w						PFC0575w	PFC0575w	PFC0575w					PFC0575w	PFC0575w		PFC0575w	PFC0575w		PFC0575w
PFC0580c	PFC0580c		PFC0580c	PFC0580c	PFC0580c	PFC0580c	PFC0580c		PFC0580c	PFC0580c	PFC0580c	PFC0580c	PFC0580c	PFC0580c	PFC0580c	PFC0580c	PFC0580c	PFC0580c	PFC0580c		PFC0580c	PFC0580c	PFC0580c	PFC0580c
PFC0581w	PFC0581w		PFC0581w	PFC0581w	PFC0581w	PFC0581w	PFC0581w		PFC0581w	PFC0581w	PFC0581w	PFC0581w	PFC0581w	PFC0581w	PFC0581w	PFC0581w	PFC0581w	PFC0581w	PFC0581w		PFC0581w	PFC0581w	PFC0581w	PFC0581w
PFC0582c	PFC0582c		PFC0582c	PFC0582c	PFC0582c	PFC0582c			PFC0582c	PFC0582c	PFC0582c	PFC0582c	PFC0582c	PFC0582c	PFC0582c	PFC0582c		PFC0582c	PFC0582c		PFC0582c	PFC0582c	PFC0582c	PFC0582c
PFC0590c	PFC0590c		PFC0590c		PFC0590c	PFC0590c		PFC0590c	PFC0590c	PFC0590c	PFC0590c	PFC0590c	PFC0590c	PFC0590c	PFC0590c	PFC0590c	PFC0590c	PFC0590c	PFC0590c		PFC0590c	PFC0590c	PFC0590c	PFC0590c
PFC0595c	PFC0595c		PFC0595c	PFC0595c	PFC0595c	PFC0595c			PFC0595c		PFC0595c	PFC0595c	PFC0595c		PFC0595c	PFC0595c		PFC0595c	PFC0595c	PFC0595c	PFC0595c	PFC0595c		PFC0595c
PFC0600w	PFC0600w		PFC0600w	PFC0600w	PFC0600w	PFC0600w			PFC0600w		PFC0600w	PFC0600w	PFC0600w		PFC0600w	PFC0600w		PFC0600w	PFC0600w		PFC0600w	PFC0600w		PFC0600w
PFC0605w	PFC0605w		PFC0605w	PFC0605w	PFC0605w	PFC0605w			PFC0605w	PFC0605w	PFC0605w	PFC0605w	PFC0605w	PFC0605w	PFC0605w	PFC0605w	PFC0605w	PFC0605w	PFC0605w		PFC0605w	PFC0605w	PFC0605w	PFC0605w
PFC0610c	PFC0610c	PFC0610c	PFC0610c		PFC0610c	PFC0610c			PFC0610c	PFC0610c	PFC0610c	PFC0610c	PFC0610c	PFC0610c	PFC0610c	PFC0610c		PFC0610c	PFC0610c		PFC0610c	PFC0610c	PFC0610c	PFC0610c
PFC0615w	PFC0615w	PFC0615w	PFC0615w		PFC0615w	PFC0615w			PFC0615w	PFC0615w	PFC0615w	PFC0615w	PFC0615w	PFC0615w	PFC0615w	PFC0615w	PFC0615w	PFC0615w	PFC0615w	PFC0615w	PFC0615w	PFC0615w	PFC0615w	PFC0615w
PFC0625w	PFC0625w		PFC0625w	PFC0625w	PFC0625w				PFC0625w	PFC0625w	PFC0625w	PFC0625w	PFC0625w					PFC0625w	PFC0625w	PFC0625w	PFC0625w	PFC0625w		PFC0625w
PFC0630w	PFC0630w		PFC0630w		PFC0630w	PFC0630w			PFC0630w		PFC0630w	PFC0630w	PFC0630w		PFC0630w	PFC0630w		PFC0630w			PFC0630w	PFC0630w		PFC0630w
PFC0635c	PFC0635c	PFC0635c	PFC0635c	PFC0635c	PFC0635c	PFC0635c					PFC0635c	PFC0635c	PFC0635c		PFC0635c	PFC0635c		PFC0635c	PFC0635c		PFC0635c	PFC0635c		PFC0635c
PFC0640w	PFC0640w	PFC0640w	PFC0640w	PFC0640w	PFC0640w	PFC0640w		PFC0640w	PFC0640w		PFC0640w	PFC0640w	PFC0640w	PFC0640w	PFC0640w	PFC0640w		PFC0640w	PFC0640w	PFC0640w	PFC0640w	PFC0640w	PFC0640w	PFC0640w
PFC0645w	PFC0645w		PFC0645w		PFC0645w	PFC0645w			PFC0645w	PFC0645w	PFC0645w	PFC0645w	PFC0645w		PFC0645w	PFC0645w		PFC0645w	PFC0645w		PFC0645w	PFC0645w		PFC0645w
PFC0650w	PFC0650w		PFC0650w	PFC0650w	PFC0650w	PFC0650w	PFC0650w		PFC0650w	PFC0650w	PFC0650w	PFC0650w	PFC0650w	PFC0650w	PFC0650w	PFC0650w		PFC0650w	PFC0650w	PFC0650w	PFC0650w	PFC0650w	PFC0650w	PFC0650w
PFC0670c	PFC0670c		PFC0670c	PFC0670c	PFC0670c	PFC0670c			PFC0670c		PFC0670c	PFC0670c		PFC0670c	PFC0670c	PFC0670c		PFC0670c	PFC0670c		PFC0670c	PFC0670c	PFC0670c	PFC0670c
PFC0675c	PFC0675c		PFC0675c		PFC0675c	PFC0675c			PFC0675c	PFC0675c	PFC0675c	PFC0675c	PFC0675c	PFC0675c	PFC0675c	PFC0675c		PFC0675c	PFC0675c	PFC0675c	PFC0675c	PFC0675c	PFC0675c	PFC0675c
PFC0680w	PFC0680w		PFC0680w		PFC0680w	PFC0680w			PFC0680w	PFC0680w	PFC0680w	PFC0680w	PFC0680w	PFC0680w	PFC0680w	PFC0680w		PFC0680w	PFC0680w	PFC0680w	PFC0680w	PFC0680w	PFC0680w	PFC0680w
PFC0685w	PFC0685w		PFC0685w	PFC0685w	PFC0685w	PFC0685w			PFC0685w		PFC0685w	PFC0685w	PFC0685w	PFC0685w				PFC0685w	PFC0685w		PFC0685w	PFC0685w	PFC0685w	PFC0685w
PFC0690c	PFC0690c	PFC0690c	PFC0690c	PFC0690c	PFC0690c	PFC0690c			PFC0690c		PFC0690c	PFC0690c	PFC0690c		PFC0690c	PFC0690c		PFC0690c	PFC0690c		PFC0690c	PFC0690c
PFC0695w	PFC0695w	PFC0695w	PFC0695w	PFC0695w	PFC0695w	PFC0695w			PFC0695w		PFC0695w	PFC0695w	PFC0695w		PFC0695w	PFC0695w		PFC0695w	PFC0695w		PFC0695w	PFC0695w
PFC0700c	PFC0700c	PFC0700c	PFC0700c	PFC0700c	PFC0700c	PFC0700c	PFC0700c		PFC0700c	PFC0700c	PFC0700c	PFC0700c	PFC0700c	PFC0700c	PFC0700c	PFC0700c	PFC0700c	PFC0700c	PFC0700c	PFC0700c	PFC0700c	PFC0700c	PFC0700c	PFC0700c
PFC0701w	PFC0701w	PFC0701w	PFC0701w	PFC0701w	PFC0701w	PFC0701w	PFC0701w		PFC0701w	PFC0701w	PFC0701w	PFC0701w	PFC0701w	PFC0701w	PFC0701w	PFC0701w	PFC0701w	PFC0701w	PFC0701w	PFC0701w	PFC0701w	PFC0701w	PFC0701w	PFC0701w
PFC0705c	PFC0705c		PFC0705c		PFC0705c	PFC0705c					PFC0705c	PFC0705c	PFC0705c			PFC0705c		PFC0705c	PFC0705c		PFC0705c	PFC0705c		PFC0705c
PFC0710w-a	PFC0710w-a		PFC0710w-a		PFC0710w-a	PFC0710w-a					PFC0710w-a	PFC0710w-a	PFC0710w-a			PFC0710w-a		PFC0710w-a	PFC0710w-a		PFC0710w-a	PFC0710w-a		PFC0710w-a
PFC0710w-b	PFC0710w-b				PFC0710w-b						PFC0710w-b	PFC0710w-b	PFC0710w-b					PFC0710w-b	PFC0710w-b		PFC0710w-b	PFC0710w-b
PFC0715c	PFC0715c		PFC0715c	PFC0715c	PFC0715c	PFC0715c			PFC0715c		PFC0715c	PFC0715c	PFC0715c	PFC0715c	PFC0715c	PFC0715c		PFC0715c	PFC0715c		PFC0715c	PFC0715c	PFC0715c	PFC0715c
PFC0720w	PFC0720w		PFC0720w	PFC0720w	PFC0720w	PFC0720w			PFC0720w		PFC0720w	PFC0720w	PFC0720w	PFC0720w	PFC0720w	PFC0720w		PFC0720w	PFC0720w		PFC0720w	PFC0720w	PFC0720w	PFC0720w
PFC0725c	PFC0725c		PFC0725c	PFC0725c	PFC0725c	PFC0725c			PFC0725c		PFC0725c	PFC0725c	PFC0725c	PFC0725c	PFC0725c	PFC0725c		PFC0725c	PFC0725c		PFC0725c	PFC0725c	PFC0725c	PFC0725c
PFC0730w	PFC0730w	PFC0730w	PFC0730w	PFC0730w	PFC0730w	PFC0730w			PFC0730w	PFC0730w	PFC0730w	PFC0730w	PFC0730w		PFC0730w	PFC0730w		PFC0730w	PFC0730w	PFC0730w	PFC0730w	PFC0730w		PFC0730w
PFC0735w	PFC0735w		PFC0735w	PFC0735w	PFC0735w	PFC0735w	PFC0735w		PFC0735w		PFC0735w	PFC0735w	PFC0735w	PFC0735w	PFC0735w	PFC0735w		PFC0735w	PFC0735w		PFC0735w	PFC0735w	PFC0735w	PFC0735w
PFC0740c	PFC0740c		PFC0740c	PFC0740c	PFC0740c	PFC0740c	PFC0740c		PFC0740c		PFC0740c	PFC0740c	PFC0740c	PFC0740c	PFC0740c	PFC0740c		PFC0740c	PFC0740c	PFC0740c	PFC0740c	PFC0740c	PFC0740c	PFC0740c
PFC0745c	PFC0745c	PFC0745c	PFC0745c	PFC0745c	PFC0745c	PFC0745c			PFC0745c	PFC0745c	PFC0745c	PFC0745c	PFC0745c		PFC0745c	PFC0745c		PFC0745c	PFC0745c		PFC0745c	PFC0745c	PFC0745c	PFC0745c
PFC0750w	PFC0750w	PFC0750w	PFC0750w	PFC0750w	PFC0750w	PFC0750w	PFC0750w		PFC0750w	PFC0750w	PFC0750w	PFC0750w	PFC0750w		PFC0750w	PFC0750w		PFC0750w	PFC0750w	PFC0750w	PFC0750w	PFC0750w	PFC0750w	PFC0750w
PFC0755c	PFC0755c		PFC0755c	PFC0755c	PFC0755c	PFC0755c			PFC0755c		PFC0755c	PFC0755c	PFC0755c	PFC0755c		PFC0755c		PFC0755c	PFC0755c	PFC0755c	PFC0755c	PFC0755c	PFC0755c	PFC0755c
PFC0760c	PFC0760c		PFC0760c	PFC0760c	PFC0760c	PFC0760c			PFC0760c		PFC0760c	PFC0760c	PFC0760c		PFC0760c			PFC0760c	PFC0760c		PFC0760c	PFC0760c		PFC0760c
PFC0765c	PFC0765c		PFC0765c	PFC0765c	PFC0765c	PFC0765c			PFC0765c		PFC0765c	PFC0765c	PFC0765c	PFC0765c	PFC0765c	PFC0765c		PFC0765c	PFC0765c		PFC0765c	PFC0765c	PFC0765c	PFC0765c
PFC0770c	PFC0770c		PFC0770c	PFC0770c	PFC0770c	PFC0770c		PFC0770c	PFC0770c		PFC0770c	PFC0770c	PFC0770c	PFC0770c	PFC0770c	PFC0770c		PFC0770c	PFC0770c	PFC0770c	PFC0770c	PFC0770c	PFC0770c	PFC0770c
PFC0775w	PFC0775w		PFC0775w	PFC0775w	PFC0775w	PFC0775w	PFC0775w		PFC0775w		PFC0775w	PFC0775w	PFC0775w	PFC0775w	PFC0775w	PFC0775w		PFC0775w	PFC0775w	PFC0775w	PFC0775w	PFC0775w	PFC0775w	PFC0775w
PFC0780w	PFC0780w		PFC0780w	PFC0780w	PFC0780w	PFC0780w			PFC0780w	PFC0780w	PFC0780w	PFC0780w	PFC0780w	PFC0780w	PFC0780w	PFC0780w		PFC0780w	PFC0780w	PFC0780w	PFC0780w	PFC0780w	PFC0780w	PFC0780w
PFC0785c	PFC0785c		PFC0785c		PFC0785c						PFC0785c	PFC0785c	PFC0785c		PFC0785c			PFC0785c	PFC0785c		PFC0785c	PFC0785c		PFC0785c
PFC0790w	PFC0790w		PFC0790w		PFC0790w				PFC0790w		PFC0790w	PFC0790w	PFC0790w		PFC0790w			PFC0790w	PFC0790w		PFC0790w	PFC0790w		PFC0790w
PFC0795w	PFC0795w				PFC0795w				PFC0795w		PFC0795w	PFC0795w	PFC0795w	PFC0795w		PFC0795w		PFC0795w	PFC0795w		PFC0795w	PFC0795w	PFC0795w	PFC0795w
PFC0800w	PFC0800w		PFC0800w		PFC0800w	PFC0800w			PFC0800w	PFC0800w	PFC0800w	PFC0800w			PFC0800w	PFC0800w		PFC0800w	PFC0800w	PFC0800w	PFC0800w	PFC0800w		PFC0800w
PFC0805w	PFC0805w		PFC0805w	PFC0805w	PFC0805w	PFC0805w			PFC0805w		PFC0805w	PFC0805w	PFC0805w		PFC0805w	PFC0805w		PFC0805w	PFC0805w		PFC0805w	PFC0805w		PFC0805w
PFC0810c	PFC0810c		PFC0810c		PFC0810c	PFC0810c					PFC0810c	PFC0810c	PFC0810c		PFC0810c	PFC0810c		PFC0810c	PFC0810c		PFC0810c	PFC0810c		PFC0810c
PFC0815c	PFC0815c	PFC0815c	PFC0815c	PFC0815c	PFC0815c	PFC0815c			PFC0815c	PFC0815c	PFC0815c	PFC0815c	PFC0815c		PFC0815c	PFC0815c	PFC0815c	PFC0815c	PFC0815c		PFC0815c	PFC0815c	PFC0815c	PFC0815c
PFC0820w	PFC0820w	PFC0820w	PFC0820w	PFC0820w	PFC0820w	PFC0820w			PFC0820w	PFC0820w	PFC0820w	PFC0820w	PFC0820w	PFC0820w	PFC0820w	PFC0820w		PFC0820w	PFC0820w		PFC0820w	PFC0820w	PFC0820w	PFC0820w
PFC0825c	PFC0825c		PFC0825c	PFC0825c	PFC0825c	PFC0825c			PFC0825c	PFC0825c	PFC0825c	PFC0825c	PFC0825c	PFC0825c	PFC0825c	PFC0825c		PFC0825c	PFC0825c		PFC0825c	PFC0825c	PFC0825c	PFC0825c
PFC0830w	PFC0830w		PFC0830w	PFC0830w	PFC0830w	PFC0830w			PFC0830w	PFC0830w	PFC0830w	PFC0830w	PFC0830w	PFC0830w	PFC0830w	PFC0830w		PFC0830w	PFC0830w		PFC0830w	PFC0830w	PFC0830w	PFC0830w
PFC0831w	PFC0831w	PFC0831w	PFC0831w	PFC0831w	PFC0831w	PFC0831w			PFC0831w	PFC0831w	PFC0831w	PFC0831w	PFC0831w	PFC0831w	PFC0831w	PFC0831w	PFC0831w	PFC0831w	PFC0831w		PFC0831w	PFC0831w	PFC0831w	PFC0831w
PFC0835c	PFC0835c		PFC0835c		PFC0835c	PFC0835c			PFC0835c		PFC0835c	PFC0835c	PFC0835c		PFC0835c	PFC0835c		PFC0835c	PFC0835c	PFC0835c	PFC0835c	PFC0835c		PFC0835c
PFC0840w	PFC0840w		PFC0840w		PFC0840w	PFC0840w			PFC0840w	PFC0840w	PFC0840w	PFC0840w	PFC0840w		PFC0840w	PFC0840w		PFC0840w	PFC0840w	PFC0840w	PFC0840w	PFC0840w		PFC0840w
PFC0845c	PFC0845c		PFC0845c		PFC0845c	PFC0845c			PFC0845c	PFC0845c	PFC0845c	PFC0845c	PFC0845c			PFC0845c		PFC0845c	PFC0845c		PFC0845c	PFC0845c		PFC0845c
PFC0850c	PFC0850c		PFC0850c		PFC0850c				PFC0850c		PFC0850c	PFC0850c	PFC0850c		PFC0850c	PFC0850c		PFC0850c	PFC0850c		PFC0850c	PFC0850c		PFC0850c
PFC0855w	PFC0855w		PFC0855w		PFC0855w				PFC0855w		PFC0855w	PFC0855w			PFC0855w	PFC0855w		PFC0855w	PFC0855w		PFC0855w	PFC0855w		PFC0855w
PFC0860w	PFC0860w	PFC0860w	PFC0860w		PFC0860w	PFC0860w			PFC0860w	PFC0860w	PFC0860w	PFC0860w	PFC0860w	PFC0860w	PFC0860w	PFC0860w	PFC0860w	PFC0860w	PFC0860w		PFC0860w	PFC0860w	PFC0860w	PFC0860w
PFC0865w	PFC0865w		PFC0865w		PFC0865w	PFC0865w		PFC0865w	PFC0865w	PFC0865w	PFC0865w	PFC0865w	PFC0865w		PFC0865w	PFC0865w		PFC0865w	PFC0865w		PFC0865w	PFC0865w		PFC0865w
PFC0870w	PFC0870w		PFC0870w	PFC0870w	PFC0870w	PFC0870w			PFC0870w		PFC0870w	PFC0870w	PFC0870w					PFC0870w	PFC0870w		PFC0870w	PFC0870w
PFC0875w	PFC0875w		PFC0875w	PFC0875w	PFC0875w	PFC0875w		PFC0875w	PFC0875w	PFC0875w	PFC0875w	PFC0875w	PFC0875w		PFC0875w	PFC0875w		PFC0875w	PFC0875w		PFC0875w	PFC0875w		PFC0875w
PFC0880c	PFC0880c	PFC0880c	PFC0880c	PFC0880c	PFC0880c	PFC0880c		PFC0880c	PFC0880c		PFC0880c	PFC0880c	PFC0880c	PFC0880c	PFC0880c	PFC0880c		PFC0880c	PFC0880c		PFC0880c	PFC0880c	PFC0880c
PFC0885c	PFC0885c		PFC0885c	PFC0885c	PFC0885c	PFC0885c			PFC0885c	PFC0885c	PFC0885c	PFC0885c	PFC0885c	PFC0885c	PFC0885c	PFC0885c	PFC0885c	PFC0885c	PFC0885c		PFC0885c	PFC0885c	PFC0885c	PFC0885c
PFC0886w	PFC0886w		PFC0886w	PFC0886w	PFC0886w	PFC0886w			PFC0886w	PFC0886w	PFC0886w	PFC0886w	PFC0886w	PFC0886w	PFC0886w	PFC0886w	PFC0886w	PFC0886w	PFC0886w		PFC0886w	PFC0886w	PFC0886w	PFC0886w
PFC0890w	PFC0890w		PFC0890w	PFC0890w	PFC0890w	PFC0890w	PFC0890w		PFC0890w		PFC0890w	PFC0890w	PFC0890w	PFC0890w	PFC0890w	PFC0890w		PFC0890w	PFC0890w		PFC0890w	PFC0890w	PFC0890w	PFC0890w
PFC0895w	PFC0895w		PFC0895w		PFC0895w	PFC0895w			PFC0895w		PFC0895w	PFC0895w	PFC0895w			PFC0895w		PFC0895w	PFC0895w		PFC0895w	PFC0895w
PFC0900w	PFC0900w		PFC0900w		PFC0900w	PFC0900w			PFC0900w	PFC0900w	PFC0900w	PFC0900w	PFC0900w	PFC0900w	PFC0900w	PFC0900w		PFC0900w	PFC0900w	PFC0900w	PFC0900w	PFC0900w	PFC0900w	PFC0900w
PFC0905c	PFC0905c		PFC0905c	PFC0905c	PFC0905c	PFC0905c			PFC0905c		PFC0905c	PFC0905c	PFC0905c		PFC0905c	PFC0905c		PFC0905c	PFC0905c	PFC0905c	PFC0905c	PFC0905c		PFC0905c
PFC0910w	PFC0910w		PFC0910w	PFC0910w	PFC0910w	PFC0910w			PFC0910w		PFC0910w	PFC0910w	PFC0910w		PFC0910w			PFC0910w	PFC0910w		PFC0910w	PFC0910w		PFC0910w
PFC0911c	PFC0911c		PFC0911c		PFC0911c				PFC0911c		PFC0911c	PFC0911c	PFC0911c		PFC0911c	PFC0911c		PFC0911c	PFC0911c		PFC0911c
PFC0912w	PFC0912w		PFC0912w		PFC0912w				PFC0912w		PFC0912w	PFC0912w	PFC0912w		PFC0912w	PFC0912w		PFC0912w	PFC0912w		PFC0912w
PFC0915w	PFC0915w		PFC0915w	PFC0915w	PFC0915w	PFC0915w					PFC0915w	PFC0915w	PFC0915w	PFC0915w	PFC0915w			PFC0915w	PFC0915w	PFC0915w	PFC0915w	PFC0915w	PFC0915w	PFC0915w
PFC0920w	PFC0920w		PFC0920w	PFC0920w	PFC0920w	PFC0920w	PFC0920w		PFC0920w		PFC0920w	PFC0920w	PFC0920w		PFC0920w	PFC0920w		PFC0920w	PFC0920w		PFC0920w	PFC0920w
PFC0925w	PFC0925w		PFC0925w	PFC0925w	PFC0925w				PFC0925w		PFC0925w	PFC0925w	PFC0925w		PFC0925w	PFC0925w		PFC0925w	PFC0925w		PFC0925w	PFC0925w		PFC0925w
PFC0930c	PFC0930c	PFC0930c	PFC0930c		PFC0930c	PFC0930c			PFC0930c		PFC0930c	PFC0930c	PFC0930c	PFC0930c	PFC0930c	PFC0930c		PFC0930c	PFC0930c		PFC0930c	PFC0930c	PFC0930c	PFC0930c
PFC0935c	PFC0935c		PFC0935c		PFC0935c	PFC0935c	PFC0935c				PFC0935c	PFC0935c	PFC0935c	PFC0935c	PFC0935c			PFC0935c	PFC0935c		PFC0935c	PFC0935c	PFC0935c	PFC0935c
PFC0940c	PFC0940c		PFC0940c	PFC0940c	PFC0940c	PFC0940c			PFC0940c	PFC0940c	PFC0940c	PFC0940c	PFC0940c	PFC0940c	PFC0940c	PFC0940c	PFC0940c	PFC0940c	PFC0940c		PFC0940c	PFC0940c	PFC0940c	PFC0940c
PFC0945w	PFC0945w		PFC0945w	PFC0945w	PFC0945w	PFC0945w			PFC0945w	PFC0945w	PFC0945w	PFC0945w	PFC0945w	PFC0945w	PFC0945w	PFC0945w	PFC0945w	PFC0945w	PFC0945w		PFC0945w	PFC0945w	PFC0945w	PFC0945w
PFC0950c	PFC0950c		PFC0950c	PFC0950c	PFC0950c	PFC0950c			PFC0950c	PFC0950c	PFC0950c	PFC0950c		PFC0950c		PFC0950c	PFC0950c	PFC0950c	PFC0950c		PFC0950c	PFC0950c	PFC0950c	PFC0950c
PFC0955w	PFC0955w		PFC0955w	PFC0955w	PFC0955w	PFC0955w			PFC0955w	PFC0955w	PFC0955w	PFC0955w		PFC0955w		PFC0955w	PFC0955w	PFC0955w	PFC0955w		PFC0955w	PFC0955w	PFC0955w	PFC0955w
PFC0960c	PFC0960c	PFC0960c	PFC0960c	PFC0960c	PFC0960c	PFC0960c			PFC0960c	PFC0960c	PFC0960c	PFC0960c	PFC0960c	PFC0960c	PFC0960c	PFC0960c	PFC0960c	PFC0960c	PFC0960c		PFC0960c	PFC0960c	PFC0960c	PFC0960c
PFC0965w	PFC0965w		PFC0965w	PFC0965w	PFC0965w	PFC0965w			PFC0965w		PFC0965w	PFC0965w	PFC0965w	PFC0965w	PFC0965w	PFC0965w		PFC0965w	PFC0965w		PFC0965w	PFC0965w	PFC0965w	PFC0965w
PFC0970w	PFC0970w	PFC0970w	PFC0970w		PFC0970w	PFC0970w			PFC0970w		PFC0970w	PFC0970w	PFC0970w		PFC0970w	PFC0970w		PFC0970w	PFC0970w		PFC0970w	PFC0970w		PFC0970w
PFC0975c	PFC0975c		PFC0975c	PFC0975c	PFC0975c	PFC0975c		PFC0975c	PFC0975c	PFC0975c	PFC0975c	PFC0975c	PFC0975c	PFC0975c	PFC0975c	PFC0975c	PFC0975c	PFC0975c	PFC0975c	PFC0975c	PFC0975c	PFC0975c	PFC0975c	PFC0975c
PFC0980c	PFC0980c		PFC0980c	PFC0980c	PFC0980c	PFC0980c			PFC0980c		PFC0980c	PFC0980c	PFC0980c					PFC0980c	PFC0980c		PFC0980c	PFC0980c		PFC0980c
PFC0990c	PFC0990c		PFC0990c	PFC0990c	PFC0990c	PFC0990c			PFC0990c	PFC0990c	PFC0990c	PFC0990c	PFC0990c		PFC0990c			PFC0990c	PFC0990c		PFC0990c	PFC0990c		PFC0990c
PFC0995c	PFC0995c	PFC0995c	PFC0995c	PFC0995c	PFC0995c	PFC0995c			PFC0995c		PFC0995c	PFC0995c	PFC0995c	PFC0995c	PFC0995c			PFC0995c	PFC0995c	PFC0995c	PFC0995c	PFC0995c	PFC0995c	PFC0995c
PFC1000w	PFC1000w	PFC1000w	PFC1000w	PFC1000w	PFC1000w	PFC1000w	PFC1000w		PFC1000w		PFC1000w	PFC1000w	PFC1000w		PFC1000w			PFC1000w	PFC1000w	PFC1000w	PFC1000w	PFC1000w		PFC1000w
PFC1005c	PFC1005c	PFC1005c	PFC1005c	PFC1005c	PFC1005c	PFC1005c			PFC1005c	PFC1005c	PFC1005c	PFC1005c	PFC1005c		PFC1005c	PFC1005c		PFC1005c	PFC1005c	PFC1005c	PFC1005c	PFC1005c		PFC1005c
PFC1010w	PFC1010w	PFC1010w	PFC1010w	PFC1010w	PFC1010w	PFC1010w			PFC1010w	PFC1010w	PFC1010w	PFC1010w	PFC1010w		PFC1010w	PFC1010w		PFC1010w	PFC1010w	PFC1010w	PFC1010w	PFC1010w		PFC1010w
PFC1011c					PFC1011c	PFC1011c					PFC1011c				PFC1011c				PFC1011c
PFC1015c	PFC1015c		PFC1015c		PFC1015c	PFC1015c			PFC1015c		PFC1015c	PFC1015c	PFC1015c	PFC1015c	PFC1015c	PFC1015c		PFC1015c	PFC1015c		PFC1015c	PFC1015c	PFC1015c	PFC1015c
PFC1016w	PFC1016w		PFC1016w		PFC1016w	PFC1016w			PFC1016w		PFC1016w	PFC1016w	PFC1016w	PFC1016w	PFC1016w	PFC1016w		PFC1016w	PFC1016w		PFC1016w	PFC1016w	PFC1016w	PFC1016w
PFC1020c	PFC1020c		PFC1020c	PFC1020c	PFC1020c	PFC1020c			PFC1020c	PFC1020c	PFC1020c	PFC1020c	PFC1020c		PFC1020c	PFC1020c	PFC1020c	PFC1020c	PFC1020c		PFC1020c	PFC1020c		PFC1020c
PFC1025w	PFC1025w		PFC1025w		PFC1025w				PFC1025w		PFC1025w	PFC1025w	PFC1025w	PFC1025w	PFC1025w	PFC1025w		PFC1025w	PFC1025w		PFC1025w	PFC1025w	PFC1025w	PFC1025w
PFC1030w	PFC1030w		PFC1030w		PFC1030w				PFC1030w		PFC1030w	PFC1030w	PFC1030w	PFC1030w	PFC1030w	PFC1030w		PFC1030w	PFC1030w		PFC1030w	PFC1030w	PFC1030w	PFC1030w
PFC1035w	PFC1035w		PFC1035w	PFC1035w	PFC1035w	PFC1035w			PFC1035w		PFC1035w	PFC1035w		PFC1035w	PFC1035w			PFC1035w	PFC1035w		PFC1035w	PFC1035w	PFC1035w	PFC1035w
PFC1040w	PFC1040w		PFC1040w		PFC1040w	PFC1040w			PFC1040w		PFC1040w	PFC1040w		PFC1040w	PFC1040w			PFC1040w	PFC1040w		PFC1040w		PFC1040w	PFC1040w
PFC1045c	PFC1045c	PFC1045c	PFC1045c	PFC1045c	PFC1045c	PFC1045c					PFC1045c	PFC1045c	PFC1045c		PFC1045c	PFC1045c		PFC1045c	PFC1045c	PFC1045c	PFC1045c	PFC1045c		PFC1045c
PFC1050w	PFC1050w	PFC1050w	PFC1050w	PFC1050w	PFC1050w	PFC1050w			PFC1050w		PFC1050w	PFC1050w	PFC1050w		PFC1050w	PFC1050w		PFC1050w	PFC1050w	PFC1050w	PFC1050w	PFC1050w
PFC1055w	PFC1055w		PFC1055w		PFC1055w				PFC1055w		PFC1055w	PFC1055w	PFC1055w	PFC1055w	PFC1055w	PFC1055w		PFC1055w	PFC1055w		PFC1055w	PFC1055w	PFC1055w	PFC1055w
PFC1060c	PFC1060c		PFC1060c	PFC1060c	PFC1060c	PFC1060c	PFC1060c		PFC1060c		PFC1060c	PFC1060c	PFC1060c		PFC1060c	PFC1060c		PFC1060c	PFC1060c		PFC1060c	PFC1060c		PFC1060c
PFC1065w	PFC1065w		PFC1065w		PFC1065w	PFC1065w			PFC1065w		PFC1065w	PFC1065w	PFC1065w	PFC1065w	PFC1065w	PFC1065w		PFC1065w	PFC1065w	PFC1065w	PFC1065w	PFC1065w	PFC1065w	PFC1065w
PFC1070c	PFC1070c	PFC1070c	PFC1070c		PFC1070c	PFC1070c			PFC1070c		PFC1070c	PFC1070c	PFC1070c	PFC1070c	PFC1070c	PFC1070c		PFC1070c	PFC1070c		PFC1070c	PFC1070c	PFC1070c	PFC1070c
PFC1075w	PFC1075w	PFC1075w	PFC1075w		PFC1075w	PFC1075w			PFC1075w		PFC1075w	PFC1075w	PFC1075w	PFC1075w	PFC1075w	PFC1075w		PFC1075w	PFC1075w		PFC1075w	PFC1075w	PFC1075w	PFC1075w
PFC1080c	PFC1080c	PFC1080c	PFC1080c		PFC1080c	PFC1080c	PFC1080c		PFC1080c	PFC1080c	PFC1080c	PFC1080c	PFC1080c	PFC1080c	PFC1080c	PFC1080c		PFC1080c	PFC1080c		PFC1080c	PFC1080c	PFC1080c	PFC1080c
PFC1085c	PFC1085c		PFC1085c		PFC1085c				PFC1085c		PFC1085c	PFC1085c	PFC1085c		PFC1085c	PFC1085c		PFC1085c	PFC1085c		PFC1085c	PFC1085c		PFC1085c
PFC1090w	PFC1090w		PFC1090w		PFC1090w				PFC1090w		PFC1090w	PFC1090w	PFC1090w		PFC1090w	PFC1090w		PFC1090w	PFC1090w		PFC1090w	PFC1090w		PFC1090w
PFC1095w	PFC1095w		PFC1095w	PFC1095w	PFC1095w	PFC1095w			PFC1095w		PFC1095w	PFC1095w	PFC1095w		PFC1095w	PFC1095w		PFC1095w	PFC1095w		PFC1095w	PFC1095w		PFC1095w
PFC1100w	PFC1100w	PFC1100w	PFC1100w	PFC1100w	PFC1100w	PFC1100w			PFC1100w	PFC1100w	PFC1100w	PFC1100w	PFC1100w		PFC1100w	PFC1100w		PFC1100w	PFC1100w		PFC1100w	PFC1100w		PFC1100w
PFC1105w	PFC1105w		PFC1105w		PFC1105w	PFC1105w			PFC1105w		PFC1105w	PFC1105w	PFC1105w	PFC1105w	PFC1105w	PFC1105w		PFC1105w	PFC1105w	PFC1105w	PFC1105w	PFC1105w	PFC1105w	PFC1105w
PFC1110w	PFC1110w		PFC1110w		PFC1110w						PFC1110w	PFC1110w	PFC1110w	PFC1110w	PFC1110w	PFC1110w		PFC1110w	PFC1110w		PFC1110w	PFC1110w	PFC1110w	PFC1110w
PFC1115w	PFC1115w		PFC1115w	PFC1115w	PFC1115w				PFC1115w		PFC1115w	PFC1115w	PFC1115w		PFC1115w	PFC1115w		PFC1115w	PFC1115w		PFC1115w	PFC1115w		PFC1115w
PFC1120c	PFC1120c	PFC1120c	PFC1120c	PFC1120c	PFC1120c	PFC1120c			PFC1120c	PFC1120c	PFC1120c	PFC1120c	PFC1120c		PFC1120c	PFC1120c	PFC1120c	PFC1120c	PFC1120c		PFC1120c	PFC1120c		PFC1120c
PFD0005w	PFD0005w	PFD0005w	PFD0005w	PFD0005w	PFD0005w				PFD0005w	PFD0005w	PFD0005w	PFD0005w	PFD0005w	PFD0005w	PFD0005w	PFD0005w	PFD0005w	PFD0005w	PFD0005w		PFD0005w	PFD0005w	PFD0005w	PFD0005w
PFD0015c	PFD0015c		PFD0015c	PFD0015c	PFD0015c				PFD0015c		PFD0015c	PFD0015c	PFD0015c		PFD0015c	PFD0015c		PFD0015c	PFD0015c		PFD0015c	PFD0015c		PFD0015c
PFD0020c	PFD0020c		PFD0020c	PFD0020c	PFD0020c	PFD0020c			PFD0020c		PFD0020c	PFD0020c	PFD0020c		PFD0020c	PFD0020c		PFD0020c	PFD0020c	PFD0020c	PFD0020c	PFD0020c		PFD0020c
PFD0025w	PFD0025w		PFD0025w	PFD0025w	PFD0025w				PFD0025w		PFD0025w	PFD0025w	PFD0025w		PFD0025w	PFD0025w		PFD0025w	PFD0025w	PFD0025w	PFD0025w	PFD0025w		PFD0025w
PFD0028w	PFD0028w		PFD0028w	PFD0028w	PFD0028w						PFD0028w	PFD0028w	PFD0028w			PFD0028w		PFD0028w			PFD0028w	PFD0028w		PFD0028w
PFD0030c	PFD0030c		PFD0030c		PFD0030c	PFD0030c			PFD0030c		PFD0030c	PFD0030c	PFD0030c	PFD0030c	PFD0030c	PFD0030c		PFD0030c	PFD0030c		PFD0030c	PFD0030c	PFD0030c	PFD0030c
PFD0035c	PFD0035c		PFD0035c	PFD0035c	PFD0035c	PFD0035c			PFD0035c		PFD0035c	PFD0035c	PFD0035c	PFD0035c	PFD0035c			PFD0035c	PFD0035c		PFD0035c	PFD0035c	PFD0035c	PFD0035c
PFD0040c	PFD0040c	PFD0040c	PFD0040c	PFD0040c	PFD0040c	PFD0040c			PFD0040c		PFD0040c	PFD0040c	PFD0040c		PFD0040c	PFD0040c		PFD0040c	PFD0040c		PFD0040c	PFD0040c		PFD0040c
PFD0045c	PFD0045c	PFD0045c	PFD0045c	PFD0045c	PFD0045c	PFD0045c			PFD0045c		PFD0045c	PFD0045c	PFD0045c		PFD0045c	PFD0045c		PFD0045c	PFD0045c		PFD0045c	PFD0045c		PFD0045c
PFD0050w	PFD0050w		PFD0050w	PFD0050w	PFD0050w	PFD0050w			PFD0050w		PFD0050w	PFD0050w	PFD0050w		PFD0050w	PFD0050w		PFD0050w	PFD0050w		PFD0050w	PFD0050w		PFD0050w
PFD0055w	PFD0055w		PFD0055w	PFD0055w	PFD0055w				PFD0055w		PFD0055w	PFD0055w	PFD0055w	PFD0055w	PFD0055w	PFD0055w		PFD0055w	PFD0055w		PFD0055w	PFD0055w	PFD0055w	PFD0055w
PFD0060w	PFD0060w		PFD0060w	PFD0060w	PFD0060w	PFD0060w			PFD0060w	PFD0060w	PFD0060w	PFD0060w	PFD0060w		PFD0060w	PFD0060w		PFD0060w	PFD0060w		PFD0060w	PFD0060w		PFD0060w
PFD0065w	PFD0065w		PFD0065w	PFD0065w	PFD0065w				PFD0065w		PFD0065w	PFD0065w	PFD0065w	PFD0065w	PFD0065w	PFD0065w		PFD0065w	PFD0065w		PFD0065w	PFD0065w	PFD0065w	PFD0065w
PFD0070c	PFD0070c		PFD0070c	PFD0070c	PFD0070c	PFD0070c			PFD0070c		PFD0070c	PFD0070c	PFD0070c		PFD0070c			PFD0070c	PFD0070c	PFD0070c	PFD0070c	PFD0070c		PFD0070c
PFD0075w	PFD0075w		PFD0075w	PFD0075w	PFD0075w	PFD0075w			PFD0075w		PFD0075w	PFD0075w	PFD0075w	PFD0075w	PFD0075w	PFD0075w		PFD0075w	PFD0075w		PFD0075w	PFD0075w	PFD0075w	PFD0075w
PFD0080c	PFD0080c		PFD0080c	PFD0080c	PFD0080c		PFD0080c		PFD0080c	PFD0080c	PFD0080c	PFD0080c	PFD0080c		PFD0080c	PFD0080c		PFD0080c	PFD0080c		PFD0080c	PFD0080c
PFD0085c	PFD0085c	PFD0085c	PFD0085c		PFD0085c	PFD0085c			PFD0085c	PFD0085c	PFD0085c	PFD0085c	PFD0085c		PFD0085c	PFD0085c		PFD0085c	PFD0085c		PFD0085c	PFD0085c		PFD0085c
PFD0090c	PFD0090c		PFD0090c		PFD0090c	PFD0090c			PFD0090c		PFD0090c	PFD0090c	PFD0090c	PFD0090c	PFD0090c	PFD0090c		PFD0090c	PFD0090c	PFD0090c	PFD0090c	PFD0090c	PFD0090c
PFD0095c	PFD0095c	PFD0095c	PFD0095c	PFD0095c	PFD0095c	PFD0095c		PFD0095c	PFD0095c	PFD0095c	PFD0095c	PFD0095c	PFD0095c	PFD0095c	PFD0095c	PFD0095c		PFD0095c	PFD0095c	PFD0095c	PFD0095c	PFD0095c	PFD0095c	PFD0095c
PFD0100c	PFD0100c		PFD0100c	PFD0100c	PFD0100c	PFD0100c			PFD0100c		PFD0100c	PFD0100c	PFD0100c	PFD0100c	PFD0100c			PFD0100c	PFD0100c		PFD0100c	PFD0100c	PFD0100c	PFD0100c
PFD0110w	PFD0110w		PFD0110w	PFD0110w	PFD0110w	PFD0110w			PFD0110w	PFD0110w	PFD0110w	PFD0110w	PFD0110w	PFD0110w	PFD0110w	PFD0110w		PFD0110w	PFD0110w		PFD0110w	PFD0110w	PFD0110w	PFD0110w
PFD0115c	PFD0115c		PFD0115c	PFD0115c	PFD0115c	PFD0115c			PFD0115c	PFD0115c	PFD0115c	PFD0115c	PFD0115c	PFD0115c	PFD0115c	PFD0115c	PFD0115c	PFD0115c	PFD0115c	PFD0115c	PFD0115c	PFD0115c	PFD0115c	PFD0115c
PFD0120w	PFD0120w		PFD0120w	PFD0120w	PFD0120w	PFD0120w			PFD0120w		PFD0120w	PFD0120w	PFD0120w	PFD0120w	PFD0120w	PFD0120w		PFD0120w	PFD0120w		PFD0120w	PFD0120w	PFD0120w	PFD0120w
PFD0125c	PFD0125c		PFD0125c	PFD0125c	PFD0125c	PFD0125c			PFD0125c		PFD0125c	PFD0125c	PFD0125c	PFD0125c	PFD0125c	PFD0125c		PFD0125c	PFD0125c		PFD0125c	PFD0125c	PFD0125c	PFD0125c
PFD0134c	PFD0134c		PFD0134c		PFD0134c	PFD0134c			PFD0134c		PFD0134c	PFD0134c			PFD0134c	PFD0134c		PFD0134c	PFD0134c		PFD0134c	PFD0134c		PFD0134c
PFD0135c	PFD0135c		PFD0135c	PFD0135c	PFD0135c	PFD0135c			PFD0135c	PFD0135c	PFD0135c	PFD0135c	PFD0135c		PFD0135c	PFD0135c		PFD0135c	PFD0135c		PFD0135c	PFD0135c		PFD0135c
PFD0140w	PFD0140w	PFD0140w	PFD0140w	PFD0140w	PFD0140w	PFD0140w			PFD0140w	PFD0140w	PFD0140w	PFD0140w	PFD0140w		PFD0140w	PFD0140w		PFD0140w	PFD0140w	PFD0140w	PFD0140w			PFD0140w
PFD0144c	PFD0144c	PFD0144c	PFD0144c	PFD0144c	PFD0144c	PFD0144c			PFD0144c	PFD0144c	PFD0144c	PFD0144c	PFD0144c		PFD0144c	PFD0144c		PFD0144c	PFD0144c		PFD0144c	PFD0144c		PFD0144c
PFD0145c	PFD0145c		PFD0145c	PFD0145c	PFD0145c	PFD0145c	PFD0145c		PFD0145c		PFD0145c	PFD0145c	PFD0145c		PFD0145c			PFD0145c	PFD0145c	PFD0145c	PFD0145c	PFD0145c
PFD0150w	PFD0150w		PFD0150w	PFD0150w	PFD0150w	PFD0150w	PFD0150w		PFD0150w		PFD0150w	PFD0150w	PFD0150w		PFD0150w			PFD0150w	PFD0150w	PFD0150w	PFD0150w	PFD0150w
PFD0155c	PFD0155c		PFD0155c	PFD0155c	PFD0155c	PFD0155c			PFD0155c		PFD0155c	PFD0155c	PFD0155c		PFD0155c	PFD0155c		PFD0155c	PFD0155c	PFD0155c	PFD0155c	PFD0155c		PFD0155c
PFD0160w	PFD0160w		PFD0160w	PFD0160w	PFD0160w	PFD0160w			PFD0160w		PFD0160w	PFD0160w	PFD0160w		PFD0160w	PFD0160w		PFD0160w	PFD0160w	PFD0160w	PFD0160w			PFD0160w
PFD0165w	PFD0165w		PFD0165w	PFD0165w	PFD0165w	PFD0165w			PFD0165w	PFD0165w	PFD0165w	PFD0165w	PFD0165w	PFD0165w	PFD0165w	PFD0165w		PFD0165w	PFD0165w		PFD0165w	PFD0165w	PFD0165w	PFD0165w
PFD0170c	PFD0170c		PFD0170c	PFD0170c	PFD0170c	PFD0170c			PFD0170c	PFD0170c	PFD0170c	PFD0170c	PFD0170c	PFD0170c	PFD0170c	PFD0170c	PFD0170c	PFD0170c	PFD0170c	PFD0170c	PFD0170c	PFD0170c	PFD0170c	PFD0170c
PFD0180c	PFD0180c		PFD0180c	PFD0180c	PFD0180c	PFD0180c			PFD0180c		PFD0180c	PFD0180c	PFD0180c	PFD0180c	PFD0180c	PFD0180c		PFD0180c	PFD0180c		PFD0180c	PFD0180c	PFD0180c	PFD0180c
PFD0185c	PFD0185c		PFD0185c	PFD0185c	PFD0185c	PFD0185c			PFD0185c	PFD0185c	PFD0185c	PFD0185c	PFD0185c	PFD0185c	PFD0185c	PFD0185c	PFD0185c	PFD0185c	PFD0185c		PFD0185c	PFD0185c	PFD0185c	PFD0185c
PFD0190w	PFD0190w		PFD0190w		PFD0190w	PFD0190w			PFD0190w		PFD0190w	PFD0190w	PFD0190w	PFD0190w	PFD0190w			PFD0190w	PFD0190w	PFD0190w	PFD0190w	PFD0190w	PFD0190w	PFD0190w
PFD0195c	PFD0195c		PFD0195c		PFD0195c	PFD0195c				PFD0195c	PFD0195c	PFD0195c	PFD0195c	PFD0195c	PFD0195c	PFD0195c	PFD0195c	PFD0195c	PFD0195c		PFD0195c	PFD0195c	PFD0195c	PFD0195c
PFD0200c	PFD0200c		PFD0200c		PFD0200c	PFD0200c			PFD0200c		PFD0200c	PFD0200c		PFD0200c	PFD0200c			PFD0200c	PFD0200c		PFD0200c		PFD0200c
PFD0205c	PFD0205c		PFD0205c		PFD0205c	PFD0205c					PFD0205c	PFD0205c		PFD0205c				PFD0205c	PFD0205c	PFD0205c	PFD0205c		PFD0205c
PFD0207c	PFD0207c		PFD0207c		PFD0207c	PFD0207c			PFD0207c		PFD0207c	PFD0207c	PFD0207c	PFD0207c		PFD0207c		PFD0207c	PFD0207c		PFD0207c	PFD0207c	PFD0207c	PFD0207c
PFD0210c	PFD0210c	PFD0210c	PFD0210c	PFD0210c	PFD0210c	PFD0210c	PFD0210c		PFD0210c		PFD0210c	PFD0210c	PFD0210c		PFD0210c	PFD0210c		PFD0210c	PFD0210c		PFD0210c	PFD0210c		PFD0210c
PFD0215c	PFD0215c	PFD0215c	PFD0215c	PFD0215c	PFD0215c	PFD0215c			PFD0215c		PFD0215c	PFD0215c	PFD0215c	PFD0215c	PFD0215c	PFD0215c		PFD0215c	PFD0215c	PFD0215c	PFD0215c	PFD0215c	PFD0215c	PFD0215c
PFD0225w	PFD0225w		PFD0225w		PFD0225w	PFD0225w					PFD0225w	PFD0225w	PFD0225w	PFD0225w	PFD0225w	PFD0225w		PFD0225w	PFD0225w		PFD0225w	PFD0225w	PFD0225w	PFD0225w
PFD0230c	PFD0230c		PFD0230c		PFD0230c					PFD0230c	PFD0230c	PFD0230c	PFD0230c	PFD0230c	PFD0230c			PFD0230c	PFD0230c		PFD0230c	PFD0230c	PFD0230c	PFD0230c
PFD0235c	PFD0235c	PFD0235c	PFD0235c	PFD0235c	PFD0235c	PFD0235c			PFD0235c	PFD0235c	PFD0235c	PFD0235c	PFD0235c			PFD0235c		PFD0235c	PFD0235c		PFD0235c	PFD0235c		PFD0235c
PFD0240c	PFD0240c		PFD0240c	PFD0240c	PFD0240c						PFD0240c	PFD0240c	PFD0240c	PFD0240c	PFD0240c			PFD0240c			PFD0240c	PFD0240c	PFD0240c	PFD0240c
PFD0245c	PFD0245c		PFD0245c		PFD0245c				PFD0245c		PFD0245c	PFD0245c	PFD0245c		PFD0245c			PFD0245c	PFD0245c		PFD0245c			PFD0245c
PFD0250c	PFD0250c		PFD0250c	PFD0250c	PFD0250c				PFD0250c	PFD0250c	PFD0250c	PFD0250c	PFD0250c	PFD0250c	PFD0250c	PFD0250c	PFD0250c	PFD0250c	PFD0250c		PFD0250c	PFD0250c	PFD0250c	PFD0250c
PFD0255w	PFD0255w		PFD0255w	PFD0255w	PFD0255w				PFD0255w	PFD0255w	PFD0255w	PFD0255w	PFD0255w	PFD0255w	PFD0255w	PFD0255w	PFD0255w	PFD0255w	PFD0255w		PFD0255w	PFD0255w	PFD0255w	PFD0255w
PFD0260c	PFD0260c		PFD0260c	PFD0260c	PFD0260c	PFD0260c			PFD0260c	PFD0260c	PFD0260c	PFD0260c	PFD0260c	PFD0260c	PFD0260c	PFD0260c		PFD0260c	PFD0260c		PFD0260c	PFD0260c	PFD0260c
PFD0265w	PFD0265w		PFD0265w		PFD0265w	PFD0265w			PFD0265w	PFD0265w	PFD0265w	PFD0265w	PFD0265w		PFD0265w			PFD0265w	PFD0265w		PFD0265w	PFD0265w
PFD0270c	PFD0270c		PFD0270c		PFD0270c	PFD0270c			PFD0270c		PFD0270c	PFD0270c	PFD0270c		PFD0270c	PFD0270c		PFD0270c	PFD0270c		PFD0270c	PFD0270c		PFD0270c
PFD0275w	PFD0275w		PFD0275w		PFD0275w	PFD0275w			PFD0275w		PFD0275w	PFD0275w	PFD0275w		PFD0275w	PFD0275w		PFD0275w	PFD0275w		PFD0275w			PFD0275w
PFD0285c	PFD0285c	PFD0285c	PFD0285c		PFD0285c	PFD0285c			PFD0285c	PFD0285c	PFD0285c	PFD0285c	PFD0285c	PFD0285c	PFD0285c	PFD0285c		PFD0285c	PFD0285c		PFD0285c	PFD0285c	PFD0285c	PFD0285c
PFD0290w	PFD0290w	PFD0290w	PFD0290w		PFD0290w	PFD0290w			PFD0290w	PFD0290w	PFD0290w	PFD0290w	PFD0290w		PFD0290w	PFD0290w		PFD0290w	PFD0290w		PFD0290w	PFD0290w		PFD0290w
PFD0295c	PFD0295c		PFD0295c	PFD0295c	PFD0295c	PFD0295c			PFD0295c		PFD0295c	PFD0295c	PFD0295c	PFD0295c	PFD0295c	PFD0295c		PFD0295c	PFD0295c		PFD0295c	PFD0295c	PFD0295c
PFD0300w	PFD0300w		PFD0300w	PFD0300w	PFD0300w	PFD0300w			PFD0300w		PFD0300w	PFD0300w	PFD0300w	PFD0300w	PFD0300w	PFD0300w		PFD0300w	PFD0300w		PFD0300w	PFD0300w	PFD0300w
PFD0305c	PFD0305c		PFD0305c	PFD0305c	PFD0305c	PFD0305c			PFD0305c		PFD0305c	PFD0305c	PFD0305c		PFD0305c			PFD0305c	PFD0305c		PFD0305c	PFD0305c		PFD0305c
PFD0310w	PFD0310w		PFD0310w		PFD0310w	PFD0310w			PFD0310w		PFD0310w	PFD0310w	PFD0310w	PFD0310w	PFD0310w	PFD0310w		PFD0310w	PFD0310w	PFD0310w	PFD0310w	PFD0310w	PFD0310w	PFD0310w
PFD0311w	PFD0311w		PFD0311w		PFD0311w				PFD0311w		PFD0311w	PFD0311w	PFD0311w	PFD0311w	PFD0311w	PFD0311w		PFD0311w	PFD0311w		PFD0311w	PFD0311w	PFD0311w	PFD0311w
PFD0320c	PFD0320c		PFD0320c	PFD0320c	PFD0320c	PFD0320c			PFD0320c	PFD0320c	PFD0320c	PFD0320c	PFD0320c	PFD0320c	PFD0320c	PFD0320c		PFD0320c	PFD0320c		PFD0320c	PFD0320c	PFD0320c	PFD0320c
PFD0325w	PFD0325w		PFD0325w	PFD0325w	PFD0325w	PFD0325w			PFD0325w	PFD0325w	PFD0325w	PFD0325w	PFD0325w	PFD0325w	PFD0325w	PFD0325w		PFD0325w	PFD0325w		PFD0325w	PFD0325w	PFD0325w	PFD0325w
PFD0330w	PFD0330w		PFD0330w	PFD0330w	PFD0330w				PFD0330w		PFD0330w	PFD0330w	PFD0330w	PFD0330w	PFD0330w	PFD0330w		PFD0330w	PFD0330w		PFD0330w	PFD0330w	PFD0330w	PFD0330w
PFD0335c	PFD0335c		PFD0335c	PFD0335c	PFD0335c				PFD0335c		PFD0335c	PFD0335c		PFD0335c				PFD0335c	PFD0335c		PFD0335c	PFD0335c	PFD0335c	PFD0335c
PFD0340c	PFD0340c		PFD0340c		PFD0340c	PFD0340c			PFD0340c		PFD0340c	PFD0340c	PFD0340c	PFD0340c	PFD0340c	PFD0340c		PFD0340c	PFD0340c	PFD0340c	PFD0340c	PFD0340c	PFD0340c	PFD0340c
PFD0345c	PFD0345c		PFD0345c	PFD0345c	PFD0345c						PFD0345c	PFD0345c	PFD0345c					PFD0345c	PFD0345c		PFD0345c
PFD0350w	PFD0350w		PFD0350w	PFD0350w	PFD0350w	PFD0350w			PFD0350w		PFD0350w	PFD0350w	PFD0350w	PFD0350w	PFD0350w			PFD0350w	PFD0350w		PFD0350w	PFD0350w	PFD0350w
PFD0355c	PFD0355c		PFD0355c	PFD0355c	PFD0355c				PFD0355c		PFD0355c	PFD0355c	PFD0355c		PFD0355c	PFD0355c		PFD0355c	PFD0355c	PFD0355c	PFD0355c	PFD0355c
PFD0360w	PFD0360w		PFD0360w	PFD0360w	PFD0360w				PFD0360w		PFD0360w	PFD0360w	PFD0360w		PFD0360w	PFD0360w		PFD0360w	PFD0360w	PFD0360w	PFD0360w	PFD0360w
PFD0365c	PFD0365c		PFD0365c	PFD0365c	PFD0365c	PFD0365c			PFD0365c		PFD0365c	PFD0365c	PFD0365c	PFD0365c	PFD0365c	PFD0365c		PFD0365c	PFD0365c	PFD0365c	PFD0365c	PFD0365c	PFD0365c	PFD0365c
PFD0367w	PFD0367w		PFD0367w	PFD0367w	PFD0367w	PFD0367w			PFD0367w		PFD0367w	PFD0367w	PFD0367w	PFD0367w	PFD0367w	PFD0367w		PFD0367w	PFD0367w	PFD0367w	PFD0367w	PFD0367w	PFD0367w	PFD0367w
PFD0375w	PFD0375w	PFD0375w	PFD0375w	PFD0375w	PFD0375w	PFD0375w		PFD0375w	PFD0375w		PFD0375w	PFD0375w	PFD0375w		PFD0375w	PFD0375w		PFD0375w	PFD0375w	PFD0375w	PFD0375w	PFD0375w		PFD0375w
PFD0380c	PFD0380c	PFD0380c	PFD0380c	PFD0380c	PFD0380c	PFD0380c			PFD0380c	PFD0380c	PFD0380c	PFD0380c	PFD0380c	PFD0380c	PFD0380c	PFD0380c	PFD0380c	PFD0380c	PFD0380c		PFD0380c	PFD0380c	PFD0380c	PFD0380c
PFD0385w	PFD0385w	PFD0385w	PFD0385w		PFD0385w	PFD0385w			PFD0385w	PFD0385w	PFD0385w	PFD0385w	PFD0385w	PFD0385w	PFD0385w	PFD0385w	PFD0385w	PFD0385w	PFD0385w		PFD0385w	PFD0385w	PFD0385w	PFD0385w
PFD0390c	PFD0390c		PFD0390c	PFD0390c	PFD0390c			PFD0390c	PFD0390c		PFD0390c	PFD0390c	PFD0390c	PFD0390c	PFD0390c	PFD0390c		PFD0390c	PFD0390c		PFD0390c	PFD0390c	PFD0390c	PFD0390c
PFD0395c	PFD0395c	PFD0395c	PFD0395c	PFD0395c	PFD0395c				PFD0395c	PFD0395c	PFD0395c	PFD0395c	PFD0395c	PFD0395c	PFD0395c	PFD0395c		PFD0395c	PFD0395c		PFD0395c	PFD0395c	PFD0395c	PFD0395c
PFD0400w	PFD0400w	PFD0400w	PFD0400w	PFD0400w	PFD0400w	PFD0400w			PFD0400w	PFD0400w	PFD0400w	PFD0400w	PFD0400w	PFD0400w	PFD0400w			PFD0400w	PFD0400w		PFD0400w	PFD0400w	PFD0400w	PFD0400w
PFD0403w	PFD0403w		PFD0403w		PFD0403w	PFD0403w			PFD0403w		PFD0403w	PFD0403w	PFD0403w	PFD0403w	PFD0403w	PFD0403w		PFD0403w	PFD0403w		PFD0403w	PFD0403w	PFD0403w
PFD0405c	PFD0405c		PFD0405c		PFD0405c	PFD0405c			PFD0405c	PFD0405c	PFD0405c	PFD0405c			PFD0405c	PFD0405c		PFD0405c	PFD0405c	PFD0405c	PFD0405c	PFD0405c		PFD0405c
PFD0415c	PFD0415c		PFD0415c	PFD0415c	PFD0415c				PFD0415c		PFD0415c	PFD0415c	PFD0415c	PFD0415c	PFD0415c			PFD0415c	PFD0415c		PFD0415c	PFD0415c	PFD0415c	PFD0415c
PFD0420c	PFD0420c	PFD0420c	PFD0420c	PFD0420c	PFD0420c	PFD0420c		PFD0420c	PFD0420c	PFD0420c	PFD0420c	PFD0420c	PFD0420c	PFD0420c	PFD0420c	PFD0420c		PFD0420c	PFD0420c	PFD0420c	PFD0420c	PFD0420c	PFD0420c	PFD0420c
PFD0425w	PFD0425w	PFD0425w	PFD0425w	PFD0425w	PFD0425w	PFD0425w			PFD0425w		PFD0425w	PFD0425w	PFD0425w	PFD0425w	PFD0425w	PFD0425w		PFD0425w	PFD0425w	PFD0425w	PFD0425w	PFD0425w	PFD0425w	PFD0425w
PFD0430c	PFD0430c	PFD0430c	PFD0430c	PFD0430c	PFD0430c	PFD0430c			PFD0430c	PFD0430c	PFD0430c	PFD0430c	PFD0430c	PFD0430c	PFD0430c	PFD0430c		PFD0430c	PFD0430c		PFD0430c	PFD0430c	PFD0430c	PFD0430c
PFD0435c	PFD0435c		PFD0435c	PFD0435c	PFD0435c				PFD0435c	PFD0435c	PFD0435c	PFD0435c	PFD0435c		PFD0435c	PFD0435c		PFD0435c	PFD0435c	PFD0435c	PFD0435c	PFD0435c		PFD0435c
PFD0440w	PFD0440w		PFD0440w	PFD0440w	PFD0440w				PFD0440w	PFD0440w	PFD0440w	PFD0440w	PFD0440w		PFD0440w	PFD0440w		PFD0440w	PFD0440w	PFD0440w	PFD0440w	PFD0440w		PFD0440w
PFD0445c	PFD0445c		PFD0445c		PFD0445c	PFD0445c		PFD0445c			PFD0445c	PFD0445c	PFD0445c	PFD0445c	PFD0445c	PFD0445c		PFD0445c	PFD0445c		PFD0445c	PFD0445c	PFD0445c	PFD0445c
PFD0450c	PFD0450c		PFD0450c		PFD0450c	PFD0450c		PFD0450c	PFD0450c		PFD0450c	PFD0450c	PFD0450c		PFD0450c			PFD0450c	PFD0450c		PFD0450c	PFD0450c		PFD0450c
PFD0455w	PFD0455w		PFD0455w		PFD0455w	PFD0455w		PFD0455w	PFD0455w		PFD0455w	PFD0455w	PFD0455w		PFD0455w			PFD0455w	PFD0455w		PFD0455w	PFD0455w		PFD0455w
PFD0460c	PFD0460c	PFD0460c	PFD0460c	PFD0460c	PFD0460c	PFD0460c			PFD0460c		PFD0460c	PFD0460c	PFD0460c		PFD0460c	PFD0460c		PFD0460c	PFD0460c		PFD0460c			PFD0460c
PFD0462w	PFD0462w	PFD0462w	PFD0462w	PFD0462w	PFD0462w	PFD0462w			PFD0462w		PFD0462w	PFD0462w	PFD0462w		PFD0462w	PFD0462w		PFD0462w	PFD0462w		PFD0462w			PFD0462w
PFD0465c	PFD0465c	PFD0465c	PFD0465c		PFD0465c	PFD0465c				PFD0465c	PFD0465c	PFD0465c	PFD0465c	PFD0465c	PFD0465c	PFD0465c	PFD0465c	PFD0465c	PFD0465c		PFD0465c	PFD0465c	PFD0465c	PFD0465c
PFD0470c	PFD0470c		PFD0470c	PFD0470c	PFD0470c		PFD0470c	PFD0470c			PFD0470c	PFD0470c	PFD0470c			PFD0470c		PFD0470c	PFD0470c		PFD0470c			PFD0470c
PFD0480w	PFD0480w		PFD0480w	PFD0480w	PFD0480w		PFD0480w	PFD0480w			PFD0480w	PFD0480w	PFD0480w			PFD0480w		PFD0480w	PFD0480w		PFD0480w			PFD0480w
PFD0485w	PFD0485w		PFD0485w	PFD0485w	PFD0485w	PFD0485w			PFD0485w	PFD0485w	PFD0485w	PFD0485w	PFD0485w		PFD0485w	PFD0485w		PFD0485w	PFD0485w		PFD0485w	PFD0485w		PFD0485w
PFD0487c	PFD0487c		PFD0487c		PFD0487c	PFD0487c			PFD0487c	PFD0487c	PFD0487c	PFD0487c	PFD0487c	PFD0487c	PFD0487c			PFD0487c	PFD0487c		PFD0487c		PFD0487c	PFD0487c
PFD0495c	PFD0495c	PFD0495c	PFD0495c	PFD0495c	PFD0495c	PFD0495c			PFD0495c		PFD0495c	PFD0495c	PFD0495c	PFD0495c	PFD0495c	PFD0495c		PFD0495c	PFD0495c	PFD0495c	PFD0495c	PFD0495c	PFD0495c	PFD0495c
PFD0505c	PFD0505c		PFD0505c	PFD0505c	PFD0505c	PFD0505c	PFD0505c		PFD0505c		PFD0505c	PFD0505c			PFD0505c	PFD0505c		PFD0505c	PFD0505c		PFD0505c	PFD0505c		PFD0505c
PFD0515w	PFD0515w		PFD0515w	PFD0515w	PFD0515w	PFD0515w	PFD0515w		PFD0515w		PFD0515w	PFD0515w			PFD0515w	PFD0515w		PFD0515w	PFD0515w		PFD0515w	PFD0515w		PFD0515w
PFD0520c	PFD0520c	PFD0520c	PFD0520c	PFD0520c	PFD0520c	PFD0520c			PFD0520c	PFD0520c	PFD0520c	PFD0520c	PFD0520c	PFD0520c	PFD0520c	PFD0520c		PFD0520c	PFD0520c		PFD0520c	PFD0520c	PFD0520c	PFD0520c
PFD0525w	PFD0525w	PFD0525w	PFD0525w	PFD0525w	PFD0525w	PFD0525w			PFD0525w		PFD0525w	PFD0525w	PFD0525w		PFD0525w	PFD0525w		PFD0525w	PFD0525w		PFD0525w	PFD0525w		PFD0525w
PFD0530c	PFD0530c		PFD0530c		PFD0530c	PFD0530c			PFD0530c	PFD0530c	PFD0530c	PFD0530c	PFD0530c	PFD0530c	PFD0530c	PFD0530c	PFD0530c	PFD0530c	PFD0530c		PFD0530c		PFD0530c	PFD0530c
PFD0535w	PFD0535w		PFD0535w		PFD0535w	PFD0535w			PFD0535w	PFD0535w	PFD0535w	PFD0535w	PFD0535w	PFD0535w	PFD0535w	PFD0535w	PFD0535w	PFD0535w	PFD0535w		PFD0535w		PFD0535w	PFD0535w
PFD0540c	PFD0540c		PFD0540c	PFD0540c	PFD0540c	PFD0540c			PFD0540c		PFD0540c	PFD0540c	PFD0540c	PFD0540c	PFD0540c	PFD0540c		PFD0540c	PFD0540c		PFD0540c	PFD0540c	PFD0540c	PFD0540c
PFD0545w	PFD0545w		PFD0545w	PFD0545w	PFD0545w	PFD0545w			PFD0545w	PFD0545w	PFD0545w	PFD0545w	PFD0545w	PFD0545w	PFD0545w	PFD0545w	PFD0545w	PFD0545w	PFD0545w		PFD0545w	PFD0545w	PFD0545w	PFD0545w
PFD0550c	PFD0550c		PFD0550c		PFD0550c	PFD0550c			PFD0550c		PFD0550c	PFD0550c	PFD0550c	PFD0550c	PFD0550c			PFD0550c	PFD0550c		PFD0550c		PFD0550c	PFD0550c
PFD0555c	PFD0555c		PFD0555c	PFD0555c	PFD0555c	PFD0555c				PFD0555c	PFD0555c	PFD0555c			PFD0555c	PFD0555c	PFD0555c	PFD0555c	PFD0555c		PFD0555c	PFD0555c		PFD0555c
PFD0560w	PFD0560w		PFD0560w	PFD0560w	PFD0560w	PFD0560w				PFD0560w	PFD0560w	PFD0560w			PFD0560w	PFD0560w	PFD0560w	PFD0560w	PFD0560w		PFD0560w	PFD0560w		PFD0560w
PFD0565c	PFD0565c		PFD0565c		PFD0565c		PFD0565c		PFD0565c		PFD0565c	PFD0565c	PFD0565c	PFD0565c	PFD0565c	PFD0565c		PFD0565c	PFD0565c	PFD0565c	PFD0565c	PFD0565c	PFD0565c
PFD0580c	PFD0580c		PFD0580c	PFD0580c	PFD0580c	PFD0580c			PFD0580c	PFD0580c	PFD0580c	PFD0580c	PFD0580c	PFD0580c	PFD0580c			PFD0580c	PFD0580c		PFD0580c		PFD0580c	PFD0580c
PFD0585c	PFD0585c		PFD0585c	PFD0585c	PFD0585c	PFD0585c			PFD0585c		PFD0585c	PFD0585c	PFD0585c	PFD0585c	PFD0585c			PFD0585c	PFD0585c	PFD0585c	PFD0585c	PFD0585c	PFD0585c	PFD0585c
PFD0590c	PFD0590c	PFD0590c	PFD0590c	PFD0590c	PFD0590c	PFD0590c			PFD0590c		PFD0590c	PFD0590c	PFD0590c	PFD0590c	PFD0590c	PFD0590c		PFD0590c	PFD0590c		PFD0590c	PFD0590c	PFD0590c	PFD0590c
PFD0595w	PFD0595w	PFD0595w	PFD0595w		PFD0595w	PFD0595w			PFD0595w		PFD0595w	PFD0595w	PFD0595w	PFD0595w	PFD0595w	PFD0595w		PFD0595w	PFD0595w		PFD0595w	PFD0595w	PFD0595w	PFD0595w
PFD0600c	PFD0600c		PFD0600c		PFD0600c	PFD0600c	PFD0600c		PFD0600c		PFD0600c	PFD0600c	PFD0600c	PFD0600c	PFD0600c	PFD0600c		PFD0600c	PFD0600c	PFD0600c	PFD0600c	PFD0600c	PFD0600c	PFD0600c
PFD0605c	PFD0605c		PFD0605c		PFD0605c				PFD0605c		PFD0605c	PFD0605c	PFD0605c	PFD0605c	PFD0605c	PFD0605c		PFD0605c	PFD0605c	PFD0605c	PFD0605c	PFD0605c	PFD0605c	PFD0605c
PFD0610w	PFD0610w		PFD0610w		PFD0610w		PFD0610w		PFD0610w		PFD0610w	PFD0610w	PFD0610w	PFD0610w	PFD0610w	PFD0610w		PFD0610w	PFD0610w	PFD0610w	PFD0610w	PFD0610w	PFD0610w	PFD0610w
PFD0615c	PFD0615c	PFD0615c	PFD0615c	PFD0615c	PFD0615c	PFD0615c			PFD0615c	PFD0615c	PFD0615c	PFD0615c	PFD0615c	PFD0615c	PFD0615c	PFD0615c	PFD0615c	PFD0615c	PFD0615c	PFD0615c	PFD0615c	PFD0615c	PFD0615c	PFD0615c
PFD0620c	PFD0620c		PFD0620c	PFD0620c	PFD0620c	PFD0620c			PFD0620c	PFD0620c	PFD0620c	PFD0620c	PFD0620c	PFD0620c	PFD0620c	PFD0620c	PFD0620c	PFD0620c	PFD0620c		PFD0620c		PFD0620c	PFD0620c
PFD0625c	PFD0625c	PFD0625c	PFD0625c	PFD0625c	PFD0625c				PFD0625c	PFD0625c	PFD0625c	PFD0625c	PFD0625c	PFD0625c	PFD0625c	PFD0625c		PFD0625c	PFD0625c		PFD0625c	PFD0625c	PFD0625c	PFD0625c
PFD0630c	PFD0630c	PFD0630c	PFD0630c	PFD0630c	PFD0630c				PFD0630c	PFD0630c	PFD0630c	PFD0630c	PFD0630c	PFD0630c	PFD0630c	PFD0630c		PFD0630c	PFD0630c		PFD0630c	PFD0630c	PFD0630c	PFD0630c
PFD0635c	PFD0635c	PFD0635c	PFD0635c	PFD0635c	PFD0635c	PFD0635c			PFD0635c	PFD0635c	PFD0635c	PFD0635c	PFD0635c		PFD0635c	PFD0635c	PFD0635c	PFD0635c	PFD0635c		PFD0635c	PFD0635c		PFD0635c
PFD0640c	PFD0640c		PFD0640c	PFD0640c	PFD0640c	PFD0640c			PFD0640c	PFD0640c	PFD0640c	PFD0640c	PFD0640c	PFD0640c	PFD0640c	PFD0640c	PFD0640c	PFD0640c	PFD0640c		PFD0640c	PFD0640c	PFD0640c	PFD0640c
PFD0645w	PFD0645w		PFD0645w		PFD0645w				PFD0645w	PFD0645w	PFD0645w	PFD0645w	PFD0645w	PFD0645w	PFD0645w	PFD0645w		PFD0645w	PFD0645w		PFD0645w	PFD0645w	PFD0645w	PFD0645w
PFD0655w	PFD0655w	PFD0655w	PFD0655w	PFD0655w	PFD0655w	PFD0655w			PFD0655w		PFD0655w	PFD0655w	PFD0655w		PFD0655w	PFD0655w		PFD0655w	PFD0655w		PFD0655w	PFD0655w		PFD0655w
PFD0660w	PFD0660w	PFD0660w	PFD0660w	PFD0660w	PFD0660w				PFD0660w		PFD0660w	PFD0660w	PFD0660w	PFD0660w		PFD0660w		PFD0660w	PFD0660w		PFD0660w	PFD0660w	PFD0660w
PFD0665c	PFD0665c	PFD0665c	PFD0665c	PFD0665c	PFD0665c				PFD0665c		PFD0665c	PFD0665c	PFD0665c	PFD0665c		PFD0665c		PFD0665c	PFD0665c		PFD0665c	PFD0665c	PFD0665c
PFD0670c	PFD0670c		PFD0670c	PFD0670c	PFD0670c	PFD0670c	PFD0670c		PFD0670c		PFD0670c	PFD0670c	PFD0670c	PFD0670c	PFD0670c	PFD0670c		PFD0670c	PFD0670c		PFD0670c	PFD0670c	PFD0670c	PFD0670c
PFD0675w	PFD0675w		PFD0675w	PFD0675w	PFD0675w	PFD0675w	PFD0675w		PFD0675w		PFD0675w	PFD0675w	PFD0675w	PFD0675w	PFD0675w	PFD0675w		PFD0675w	PFD0675w		PFD0675w	PFD0675w	PFD0675w	PFD0675w
PFD0680c	PFD0680c		PFD0680c	PFD0680c	PFD0680c	PFD0680c			PFD0680c	PFD0680c	PFD0680c	PFD0680c		PFD0680c	PFD0680c	PFD0680c		PFD0680c	PFD0680c		PFD0680c	PFD0680c	PFD0680c	PFD0680c
PFD0685c	PFD0685c		PFD0685c		PFD0685c	PFD0685c			PFD0685c		PFD0685c	PFD0685c			PFD0685c			PFD0685c			PFD0685c	PFD0685c		PFD0685c
PFD0690c	PFD0690c		PFD0690c	PFD0690c	PFD0690c	PFD0690c			PFD0690c		PFD0690c	PFD0690c	PFD0690c		PFD0690c	PFD0690c		PFD0690c	PFD0690c		PFD0690c	PFD0690c		PFD0690c
PFD0692c	PFD0692c	PFD0692c	PFD0692c		PFD0692c	PFD0692c			PFD0692c		PFD0692c	PFD0692c	PFD0692c		PFD0692c	PFD0692c		PFD0692c	PFD0692c		PFD0692c	PFD0692c		PFD0692c
PFD0669c	PFD0669c	PFD0669c	PFD0669c	PFD0669c	PFD0669c	PFD0669c	PFD0669c		PFD0669c	PFD0669c	PFD0669c	PFD0669c	PFD0669c	PFD0669c	PFD0669c	PFD0669c	PFD0669c	PFD0669c	PFD0669c		PFD0669c	PFD0669c	PFD0669c	PFD0669c
PFD0695w	PFD0695w	PFD0695w	PFD0695w	PFD0695w	PFD0695w	PFD0695w	PFD0695w		PFD0695w	PFD0695w	PFD0695w	PFD0695w	PFD0695w	PFD0695w	PFD0695w	PFD0695w	PFD0695w	PFD0695w	PFD0695w		PFD0695w	PFD0695w	PFD0695w	PFD0695w
PFD0700c	PFD0700c		PFD0700c	PFD0700c	PFD0700c				PFD0700c		PFD0700c	PFD0700c	PFD0700c	PFD0700c	PFD0700c			PFD0700c	PFD0700c		PFD0700c	PFD0700c	PFD0700c	PFD0700c
PFD0705c	PFD0705c		PFD0705c	PFD0705c	PFD0705c		PFD0705c		PFD0705c		PFD0705c	PFD0705c	PFD0705c	PFD0705c	PFD0705c	PFD0705c		PFD0705c	PFD0705c		PFD0705c	PFD0705c	PFD0705c	PFD0705c
PFD0710w	PFD0710w		PFD0710w	PFD0710w	PFD0710w		PFD0710w		PFD0710w		PFD0710w	PFD0710w	PFD0710w	PFD0710w	PFD0710w	PFD0710w		PFD0710w	PFD0710w		PFD0710w	PFD0710w	PFD0710w	PFD0710w
PFD0715c	PFD0715c		PFD0715c	PFD0715c	PFD0715c	PFD0715c					PFD0715c	PFD0715c	PFD0715c	PFD0715c	PFD0715c	PFD0715c		PFD0715c	PFD0715c	PFD0715c	PFD0715c	PFD0715c	PFD0715c	PFD0715c
PFD0720w	PFD0720w		PFD0720w	PFD0720w	PFD0720w	PFD0720w					PFD0720w	PFD0720w	PFD0720w	PFD0720w	PFD0720w	PFD0720w		PFD0720w	PFD0720w	PFD0720w	PFD0720w	PFD0720w	PFD0720w	PFD0720w
PFD0725c	PFD0725c		PFD0725c		PFD0725c				PFD0725c		PFD0725c	PFD0725c	PFD0725c			PFD0725c		PFD0725c	PFD0725c		PFD0725c	PFD0725c		PFD0725c
PFD0730w	PFD0730w		PFD0730w		PFD0730w				PFD0730w		PFD0730w	PFD0730w	PFD0730w			PFD0730w		PFD0730w	PFD0730w		PFD0730w	PFD0730w		PFD0730w
PFD0735c	PFD0735c	PFD0735c	PFD0735c	PFD0735c	PFD0735c	PFD0735c	PFD0735c		PFD0735c	PFD0735c	PFD0735c	PFD0735c	PFD0735c	PFD0735c	PFD0735c		PFD0735c	PFD0735c	PFD0735c		PFD0735c	PFD0735c	PFD0735c	PFD0735c
PFD0740w	PFD0740w	PFD0740w	PFD0740w	PFD0740w	PFD0740w	PFD0740w			PFD0740w	PFD0740w	PFD0740w	PFD0740w	PFD0740w		PFD0740w			PFD0740w	PFD0740w		PFD0740w	PFD0740w		PFD0740w
PFD0745c	PFD0745c	PFD0745c	PFD0745c		PFD0745c	PFD0745c					PFD0745c	PFD0745c	PFD0745c		PFD0745c	PFD0745c		PFD0745c	PFD0745c		PFD0745c	PFD0745c
PFD0750w	PFD0750w	PFD0750w	PFD0750w		PFD0750w	PFD0750w					PFD0750w	PFD0750w	PFD0750w		PFD0750w	PFD0750w		PFD0750w	PFD0750w		PFD0750w	PFD0750w
PFD0755c	PFD0755c		PFD0755c	PFD0755c	PFD0755c	PFD0755c	PFD0755c		PFD0755c		PFD0755c	PFD0755c	PFD0755c		PFD0755c	PFD0755c		PFD0755c	PFD0755c		PFD0755c	PFD0755c		PFD0755c
PFD0760c	PFD0760c		PFD0760c	PFD0760c	PFD0760c	PFD0760c			PFD0760c	PFD0760c	PFD0760c	PFD0760c	PFD0760c	PFD0760c	PFD0760c			PFD0760c	PFD0760c		PFD0760c	PFD0760c	PFD0760c	PFD0760c
PFD0765w	PFD0765w		PFD0765w	PFD0765w	PFD0765w	PFD0765w			PFD0765w	PFD0765w	PFD0765w	PFD0765w	PFD0765w	PFD0765w	PFD0765w			PFD0765w	PFD0765w		PFD0765w	PFD0765w	PFD0765w	PFD0765w
PFD0770c	PFD0770c		PFD0770c	PFD0770c	PFD0770c	PFD0770c			PFD0770c		PFD0770c	PFD0770c	PFD0770c	PFD0770c	PFD0770c	PFD0770c		PFD0770c	PFD0770c	PFD0770c	PFD0770c	PFD0770c	PFD0770c	PFD0770c
PFD0775c	PFD0775c	PFD0775c	PFD0775c	PFD0775c	PFD0775c	PFD0775c			PFD0775c	PFD0775c	PFD0775c	PFD0775c	PFD0775c	PFD0775c	PFD0775c	PFD0775c		PFD0775c	PFD0775c		PFD0775c	PFD0775c	PFD0775c	PFD0775c
PFD0780w	PFD0780w	PFD0780w	PFD0780w	PFD0780w	PFD0780w	PFD0780w			PFD0780w	PFD0780w	PFD0780w	PFD0780w	PFD0780w	PFD0780w	PFD0780w	PFD0780w		PFD0780w	PFD0780w		PFD0780w	PFD0780w	PFD0780w	PFD0780w
PFD0785c	PFD0785c		PFD0785c	PFD0785c	PFD0785c				PFD0785c		PFD0785c	PFD0785c	PFD0785c		PFD0785c			PFD0785c	PFD0785c	PFD0785c	PFD0785c	PFD0785c		PFD0785c
PFD0790c	PFD0790c		PFD0790c		PFD0790c	PFD0790c			PFD0790c		PFD0790c	PFD0790c	PFD0790c	PFD0790c	PFD0790c	PFD0790c		PFD0790c	PFD0790c	PFD0790c	PFD0790c	PFD0790c	PFD0790c
PFD0795w	PFD0795w		PFD0795w	PFD0795w	PFD0795w	PFD0795w			PFD0795w	PFD0795w	PFD0795w	PFD0795w	PFD0795w	PFD0795w	PFD0795w	PFD0795w	PFD0795w	PFD0795w	PFD0795w	PFD0795w	PFD0795w	PFD0795w	PFD0795w	PFD0795w
PFD0800c	PFD0800c		PFD0800c	PFD0800c	PFD0800c	PFD0800c			PFD0800c		PFD0800c	PFD0800c	PFD0800c	PFD0800c	PFD0800c	PFD0800c		PFD0800c	PFD0800c	PFD0800c	PFD0800c	PFD0800c	PFD0800c	PFD0800c
PFD0805w	PFD0805w		PFD0805w	PFD0805w	PFD0805w	PFD0805w			PFD0805w		PFD0805w	PFD0805w	PFD0805w	PFD0805w	PFD0805w	PFD0805w		PFD0805w	PFD0805w	PFD0805w	PFD0805w	PFD0805w	PFD0805w	PFD0805w
PFD0807c	PFD0807c		PFD0807c	PFD0807c	PFD0807c	PFD0807c			PFD0807c		PFD0807c	PFD0807c	PFD0807c		PFD0807c	PFD0807c		PFD0807c	PFD0807c		PFD0807c	PFD0807c		PFD0807c
PFD0810w	PFD0810w		PFD0810w	PFD0810w	PFD0810w	PFD0810w			PFD0810w		PFD0810w	PFD0810w	PFD0810w		PFD0810w	PFD0810w		PFD0810w	PFD0810w		PFD0810w	PFD0810w		PFD0810w
PFD0815c	PFD0815c		PFD0815c	PFD0815c	PFD0815c	PFD0815c			PFD0815c		PFD0815c	PFD0815c	PFD0815c	PFD0815c	PFD0815c			PFD0815c	PFD0815c		PFD0815c	PFD0815c	PFD0815c	PFD0815c
PFD0820w	PFD0820w		PFD0820w	PFD0820w	PFD0820w	PFD0820w			PFD0820w		PFD0820w	PFD0820w	PFD0820w	PFD0820w	PFD0820w			PFD0820w	PFD0820w		PFD0820w	PFD0820w	PFD0820w	PFD0820w
PFD0825c	PFD0825c	PFD0825c	PFD0825c	PFD0825c	PFD0825c	PFD0825c			PFD0825c	PFD0825c	PFD0825c	PFD0825c	PFD0825c	PFD0825c	PFD0825c	PFD0825c	PFD0825c	PFD0825c	PFD0825c	PFD0825c	PFD0825c	PFD0825c	PFD0825c	PFD0825c
PFD0830w	PFD0830w	PFD0830w	PFD0830w	PFD0830w	PFD0830w	PFD0830w			PFD0830w	PFD0830w	PFD0830w	PFD0830w	PFD0830w	PFD0830w	PFD0830w	PFD0830w	PFD0830w	PFD0830w	PFD0830w	PFD0830w	PFD0830w	PFD0830w	PFD0830w	PFD0830w
PFD0835c	PFD0835c		PFD0835c	PFD0835c	PFD0835c	PFD0835c			PFD0835c	PFD0835c	PFD0835c	PFD0835c	PFD0835c	PFD0835c	PFD0835c	PFD0835c		PFD0835c	PFD0835c		PFD0835c	PFD0835c	PFD0835c	PFD0835c
PFD0840w	PFD0840w		PFD0840w	PFD0840w	PFD0840w	PFD0840w		PFD0840w	PFD0840w	PFD0840w	PFD0840w	PFD0840w	PFD0840w	PFD0840w	PFD0840w	PFD0840w		PFD0840w	PFD0840w	PFD0840w	PFD0840w	PFD0840w	PFD0840w	PFD0840w
PFD0850c	PFD0850c		PFD0850c		PFD0850c				PFD0850c		PFD0850c	PFD0850c		PFD0850c	PFD0850c	PFD0850c		PFD0850c		PFD0850c	PFD0850c	PFD0850c	PFD0850c	PFD0850c
PFD0855c	PFD0855c		PFD0855c	PFD0855c	PFD0855c				PFD0855c	PFD0855c	PFD0855c	PFD0855c	PFD0855c		PFD0855c		PFD0855c	PFD0855c	PFD0855c		PFD0855c	PFD0855c		PFD0855c
PFD0860w	PFD0860w		PFD0860w	PFD0860w	PFD0860w				PFD0860w	PFD0860w	PFD0860w	PFD0860w	PFD0860w		PFD0860w		PFD0860w	PFD0860w	PFD0860w		PFD0860w	PFD0860w		PFD0860w
PFD0865c	PFD0865c		PFD0865c		PFD0865c	PFD0865c		PFD0865c		PFD0865c	PFD0865c	PFD0865c	PFD0865c		PFD0865c	PFD0865c		PFD0865c	PFD0865c	PFD0865c	PFD0865c	PFD0865c		PFD0865c
PFD0870w	PFD0870w		PFD0870w		PFD0870w	PFD0870w		PFD0870w		PFD0870w	PFD0870w	PFD0870w	PFD0870w		PFD0870w	PFD0870w		PFD0870w	PFD0870w	PFD0870w	PFD0870w	PFD0870w		PFD0870w
PFD0872w	PFD0872w		PFD0872w		PFD0872w	PFD0872w			PFD0872w	PFD0872w	PFD0872w	PFD0872w	PFD0872w	PFD0872w	PFD0872w			PFD0872w	PFD0872w		PFD0872w	PFD0872w	PFD0872w	PFD0872w
PFD0875c	PFD0875c		PFD0875c	PFD0875c	PFD0875c	PFD0875c			PFD0875c		PFD0875c	PFD0875c	PFD0875c		PFD0875c	PFD0875c		PFD0875c	PFD0875c	PFD0875c	PFD0875c	PFD0875c		PFD0875c
PFD0880w	PFD0880w		PFD0880w	PFD0880w	PFD0880w				PFD0880w		PFD0880w	PFD0880w	PFD0880w		PFD0880w	PFD0880w		PFD0880w	PFD0880w	PFD0880w	PFD0880w	PFD0880w		PFD0880w
PFD0885c	PFD0885c		PFD0885c		PFD0885c	PFD0885c			PFD0885c		PFD0885c	PFD0885c	PFD0885c	PFD0885c	PFD0885c	PFD0885c		PFD0885c	PFD0885c		PFD0885c	PFD0885c	PFD0885c	PFD0885c
PFD0890w	PFD0890w	PFD0890w	PFD0890w	PFD0890w	PFD0890w	PFD0890w			PFD0890w		PFD0890w	PFD0890w	PFD0890w		PFD0890w	PFD0890w		PFD0890w	PFD0890w	PFD0890w	PFD0890w	PFD0890w		PFD0890w
PFD0895c	PFD0895c		PFD0895c	PFD0895c	PFD0895c	PFD0895c			PFD0895c	PFD0895c	PFD0895c	PFD0895c	PFD0895c	PFD0895c	PFD0895c	PFD0895c	PFD0895c	PFD0895c	PFD0895c		PFD0895c	PFD0895c	PFD0895c	PFD0895c
PFD0900w	PFD0900w		PFD0900w	PFD0900w	PFD0900w	PFD0900w			PFD0900w	PFD0900w	PFD0900w	PFD0900w	PFD0900w	PFD0900w	PFD0900w	PFD0900w	PFD0900w	PFD0900w	PFD0900w		PFD0900w	PFD0900w	PFD0900w	PFD0900w
PFD0905w	PFD0905w		PFD0905w		PFD0905w	PFD0905w					PFD0905w	PFD0905w	PFD0905w		PFD0905w	PFD0905w		PFD0905w	PFD0905w		PFD0905w	PFD0905w		PFD0905w
PFD0910w	PFD0910w		PFD0910w	PFD0910w	PFD0910w				PFD0910w		PFD0910w	PFD0910w	PFD0910w					PFD0910w	PFD0910w	PFD0910w	PFD0910w	PFD0910w		PFD0910w
PFD0915w	PFD0915w		PFD0915w	PFD0915w	PFD0915w	PFD0915w			PFD0915w	PFD0915w	PFD0915w	PFD0915w	PFD0915w		PFD0915w	PFD0915w		PFD0915w	PFD0915w	PFD0915w	PFD0915w	PFD0915w		PFD0915w
PFD0920w	PFD0920w		PFD0920w		PFD0920w	PFD0920w			PFD0920w		PFD0920w	PFD0920w	PFD0920w		PFD0920w	PFD0920w		PFD0920w			PFD0920w	PFD0920w		PFD0920w
PFD0925w	PFD0925w				PFD0925w						PFD0925w	PFD0925w						PFD0925w			PFD0925w
PFD0930w	PFD0930w		PFD0930w	PFD0930w	PFD0930w	PFD0930w		PFD0930w	PFD0930w		PFD0930w	PFD0930w	PFD0930w	PFD0930w	PFD0930w			PFD0930w	PFD0930w		PFD0930w	PFD0930w	PFD0930w	PFD0930w
PFD0935c	PFD0935c		PFD0935c		PFD0935c	PFD0935c			PFD0935c		PFD0935c	PFD0935c		PFD0935c	PFD0935c	PFD0935c		PFD0935c	PFD0935c		PFD0935c	PFD0935c	PFD0935c	PFD0935c
PFD0940w	PFD0940w		PFD0940w		PFD0940w	PFD0940w			PFD0940w		PFD0940w	PFD0940w		PFD0940w	PFD0940w	PFD0940w		PFD0940w	PFD0940w		PFD0940w	PFD0940w	PFD0940w	PFD0940w
PFD0945c	PFD0945c		PFD0945c	PFD0945c	PFD0945c				PFD0945c		PFD0945c	PFD0945c	PFD0945c	PFD0945c	PFD0945c			PFD0945c	PFD0945c		PFD0945c		PFD0945c	PFD0945c
PFD0950w	PFD0950w		PFD0950w	PFD0950w	PFD0950w				PFD0950w		PFD0950w	PFD0950w	PFD0950w	PFD0950w	PFD0950w			PFD0950w	PFD0950w		PFD0950w	PFD0950w	PFD0950w	PFD0950w
PFD0955w	PFD0955w		PFD0955w		PFD0955w				PFD0955w		PFD0955w	PFD0955w	PFD0955w		PFD0955w			PFD0955w	PFD0955w		PFD0955w	PFD0955w		PFD0955w
PFD0960c	PFD0960c		PFD0960c	PFD0960c	PFD0960c	PFD0960c					PFD0960c	PFD0960c	PFD0960c		PFD0960c			PFD0960c	PFD0960c		PFD0960c	PFD0960c		PFD0960c
PFD0965W	PFD0965W		PFD0965W	PFD0965W	PFD0965W	PFD0965W			PFD0965W		PFD0965W	PFD0965W	PFD0965W	PFD0965W	PFD0965W	PFD0965W		PFD0965W	PFD0965W		PFD0965W	PFD0965W	PFD0965W	PFD0965W
PFD0970c	PFD0970c		PFD0970c	PFD0970c	PFD0970c	PFD0970c					PFD0970c	PFD0970c	PFD0970c	PFD0970c	PFD0970c			PFD0970c	PFD0970c		PFD0970c	PFD0970c	PFD0970c	PFD0970c
PFD0975w	PFD0975w		PFD0975w	PFD0975w	PFD0975w	PFD0975w			PFD0975w		PFD0975w	PFD0975w	PFD0975w	PFD0975w	PFD0975w			PFD0975w	PFD0975w		PFD0975w	PFD0975w	PFD0975w	PFD0975w
PFD0980w	PFD0980w		PFD0980w	PFD0980w	PFD0980w	PFD0980w	PFD0980w		PFD0980w		PFD0980w	PFD0980w	PFD0980w	PFD0980w	PFD0980w			PFD0980w	PFD0980w		PFD0980w	PFD0980w	PFD0980w	PFD0980w
PFD0985w	PFD0985w		PFD0985w	PFD0985w	PFD0985w	PFD0985w			PFD0985w		PFD0985w	PFD0985w	PFD0985w	PFD0985w	PFD0985w	PFD0985w		PFD0985w	PFD0985w		PFD0985w	PFD0985w	PFD0985w	PFD0985w
PFD0990w	PFD0990w		PFD0990w	PFD0990w	PFD0990w	PFD0990w			PFD0990w		PFD0990w	PFD0990w	PFD0990w	PFD0990w	PFD0990w			PFD0990w	PFD0990w		PFD0990w	PFD0990w	PFD0990w	PFD0990w
PFD0993c	PFD0993c		PFD0993c	PFD0993c	PFD0993c						PFD0993c	PFD0993c	PFD0993c	PFD0993c	PFD0993c			PFD0993c	PFD0993c		PFD0993c	PFD0993c	PFD0993c	PFD0993c
PFD0995c	PFD0995c	PFD0995c	PFD0995c	PFD0995c	PFD0995c	PFD0995c			PFD0995c		PFD0995c	PFD0995c	PFD0995c	PFD0995c	PFD0995c	PFD0995c		PFD0995c	PFD0995c	PFD0995c	PFD0995c	PFD0995c	PFD0995c	PFD0995c
PFD1000c	PFD1000c	PFD1000c	PFD1000c	PFD1000c	PFD1000c	PFD1000c			PFD1000c		PFD1000c	PFD1000c	PFD1000c	PFD1000c	PFD1000c	PFD1000c		PFD1000c	PFD1000c	PFD1000c	PFD1000c	PFD1000c	PFD1000c	PFD1000c
PFD1005c	PFD1005c		PFD1005c	PFD1005c	PFD1005c				PFD1005c	PFD1005c	PFD1005c	PFD1005c	PFD1005c		PFD1005c	PFD1005c		PFD1005c	PFD1005c		PFD1005c	PFD1005c		PFD1005c
PFD1010w	PFD1010w		PFD1010w	PFD1010w	PFD1010w				PFD1010w	PFD1010w	PFD1010w	PFD1010w	PFD1010w		PFD1010w	PFD1010w		PFD1010w	PFD1010w		PFD1010w	PFD1010w		PFD1010w
PFD1015c	PFD1015c	PFD1015c	PFD1015c	PFD1015c	PFD1015c				PFD1015c	PFD1015c	PFD1015c	PFD1015c	PFD1015c	PFD1015c	PFD1015c	PFD1015c		PFD1015c	PFD1015c	PFD1015c	PFD1015c	PFD1015c	PFD1015c	PFD1015c
PFD1020c	PFD1020c		PFD1020c	PFD1020c	PFD1020c	PFD1020c			PFD1020c		PFD1020c	PFD1020c	PFD1020c		PFD1020c	PFD1020c		PFD1020c	PFD1020c	PFD1020c	PFD1020c	PFD1020c		PFD1020c
PFD1025w	PFD1025w		PFD1025w	PFD1025w	PFD1025w	PFD1025w			PFD1025w	PFD1025w	PFD1025w	PFD1025w	PFD1025w	PFD1025w	PFD1025w	PFD1025w		PFD1025w	PFD1025w	PFD1025w	PFD1025w	PFD1025w	PFD1025w	PFD1025w
PFD1030c	PFD1030c	PFD1030c	PFD1030c	PFD1030c	PFD1030c	PFD1030c			PFD1030c	PFD1030c	PFD1030c	PFD1030c	PFD1030c	PFD1030c	PFD1030c	PFD1030c		PFD1030c	PFD1030c		PFD1030c	PFD1030c	PFD1030c	PFD1030c
PFD1006w	PFD1006w	PFD1006w	PFD1006w	PFD1006w	PFD1006w	PFD1006w			PFD1006w	PFD1006w	PFD1006w	PFD1006w	PFD1006w	PFD1006w	PFD1006w	PFD1006w		PFD1006w	PFD1006w		PFD1006w	PFD1006w	PFD1006w	PFD1006w
PFD1007w	PFD1007w	PFD1007w	PFD1007w	PFD1007w	PFD1007w	PFD1007w			PFD1007w	PFD1007w	PFD1007w	PFD1007w	PFD1007w	PFD1007w	PFD1007w	PFD1007w		PFD1007w	PFD1007w	PFD1007w	PFD1007w	PFD1007w	PFD1007w	PFD1007w
PFD1035w	PFD1035w		PFD1035w	PFD1035w	PFD1035w	PFD1035w			PFD1035w		PFD1035w	PFD1035w		PFD1035w	PFD1035w	PFD1035w		PFD1035w	PFD1035w		PFD1035w	PFD1035w	PFD1035w	PFD1035w
PFD1037w	PFD1037w		PFD1037w		PFD1037w	PFD1037w			PFD1037w		PFD1037w	PFD1037w	PFD1037w	PFD1037w	PFD1037w	PFD1037w		PFD1037w	PFD1037w		PFD1037w	PFD1037w	PFD1037w	PFD1037w
PFD1045c	PFD1045c		PFD1045c	PFD1045c	PFD1045c	PFD1045c			PFD1045c	PFD1045c	PFD1045c	PFD1045c	PFD1045c	PFD1045c	PFD1045c	PFD1045c		PFD1045c	PFD1045c		PFD1045c	PFD1045c	PFD1045c	PFD1045c
PFD1050w	PFD1050w	PFD1050w	PFD1050w	PFD1050w	PFD1050w	PFD1050w			PFD1050w	PFD1050w	PFD1050w	PFD1050w	PFD1050w	PFD1050w	PFD1050w			PFD1050w	PFD1050w		PFD1050w	PFD1050w	PFD1050w	PFD1050w
PFD1055w	PFD1055w		PFD1055w		PFD1055w	PFD1055w		PFD1055w	PFD1055w		PFD1055w	PFD1055w	PFD1055w	PFD1055w	PFD1055w	PFD1055w		PFD1055w	PFD1055w		PFD1055w	PFD1055w	PFD1055w	PFD1055w
PFD1060w	PFD1060w		PFD1060w	PFD1060w	PFD1060w	PFD1060w		PFD1060w	PFD1060w	PFD1060w	PFD1060w	PFD1060w	PFD1060w		PFD1060w	PFD1060w		PFD1060w	PFD1060w		PFD1060w	PFD1060w		PFD1060w
PFD1065c	PFD1065c	PFD1065c	PFD1065c	PFD1065c	PFD1065c	PFD1065c	PFD1065c		PFD1065c		PFD1065c	PFD1065c	PFD1065c	PFD1065c	PFD1065c	PFD1065c		PFD1065c	PFD1065c	PFD1065c	PFD1065c	PFD1065c	PFD1065c	PFD1065c
PFD1070w	PFD1070w	PFD1070w	PFD1070w	PFD1070w	PFD1070w	PFD1070w	PFD1070w		PFD1070w		PFD1070w	PFD1070w	PFD1070w	PFD1070w	PFD1070w	PFD1070w		PFD1070w	PFD1070w	PFD1070w	PFD1070w	PFD1070w	PFD1070w	PFD1070w
PFD1075w	PFD1075w				PFD1075w	PFD1075w					PFD1075w	PFD1075w	PFD1075w		PFD1075w			PFD1075w	PFD1075w		PFD1075w	PFD1075w		PFD1075w
PFD1080w	PFD1080w		PFD1080w		PFD1080w				PFD1080w		PFD1080w	PFD1080w			PFD1080w	PFD1080w		PFD1080w			PFD1080w
PFD1085w	PFD1085w		PFD1085w	PFD1085w	PFD1085w	PFD1085w			PFD1085w		PFD1085w	PFD1085w	PFD1085w	PFD1085w	PFD1085w			PFD1085w	PFD1085w		PFD1085w	PFD1085w	PFD1085w	PFD1085w
PFD1090c	PFD1090c		PFD1090c	PFD1090c	PFD1090c	PFD1090c			PFD1090c		PFD1090c	PFD1090c	PFD1090c	PFD1090c	PFD1090c			PFD1090c	PFD1090c	PFD1090c	PFD1090c	PFD1090c	PFD1090c	PFD1090c
PFD1095w	PFD1095w		PFD1095w	PFD1095w	PFD1095w	PFD1095w			PFD1095w		PFD1095w	PFD1095w	PFD1095w	PFD1095w	PFD1095w			PFD1095w	PFD1095w	PFD1095w	PFD1095w	PFD1095w	PFD1095w
PFD1100c	PFD1100c	PFD1100c	PFD1100c	PFD1100c	PFD1100c	PFD1100c			PFD1100c		PFD1100c	PFD1100c	PFD1100c	PFD1100c	PFD1100c	PFD1100c		PFD1100c	PFD1100c		PFD1100c	PFD1100c	PFD1100c	PFD1100c
PFD1105w	PFD1105w	PFD1105w	PFD1105w	PFD1105w	PFD1105w	PFD1105w			PFD1105w	PFD1105w	PFD1105w	PFD1105w	PFD1105w		PFD1105w	PFD1105w		PFD1105w	PFD1105w	PFD1105w	PFD1105w	PFD1105w		PFD1105w
PFD1110w	PFD1110w		PFD1110w	PFD1110w	PFD1110w				PFD1110w	PFD1110w	PFD1110w	PFD1110w	PFD1110w	PFD1110w	PFD1110w	PFD1110w	PFD1110w	PFD1110w	PFD1110w		PFD1110w	PFD1110w	PFD1110w	PFD1110w
PFD1115c	PFD1115c		PFD1115c	PFD1115c	PFD1115c	PFD1115c		PFD1115c	PFD1115c	PFD1115c	PFD1115c	PFD1115c		PFD1115c	PFD1115c	PFD1115c	PFD1115c	PFD1115c	PFD1115c		PFD1115c	PFD1115c	PFD1115c	PFD1115c
PFD1120c	PFD1120c	PFD1120c	PFD1120c		PFD1120c		PFD1120c	PFD1120c	PFD1120c	PFD1120c	PFD1120c	PFD1120c	PFD1120c	PFD1120c	PFD1120c		PFD1120c	PFD1120c	PFD1120c		PFD1120c	PFD1120c	PFD1120c	PFD1120c
PFD1130w	PFD1130w	PFD1130w	PFD1130w	PFD1130w	PFD1130w	PFD1130w			PFD1130w		PFD1130w	PFD1130w	PFD1130w	PFD1130w	PFD1130w	PFD1130w		PFD1130w	PFD1130w	PFD1130w	PFD1130w	PFD1130w	PFD1130w	PFD1130w
PFD1135c	PFD1135c		PFD1135c	PFD1135c	PFD1135c	PFD1135c	PFD1135c		PFD1135c	PFD1135c	PFD1135c	PFD1135c	PFD1135c		PFD1135c	PFD1135c	PFD1135c	PFD1135c	PFD1135c		PFD1135c	PFD1135c		PFD1135c
PFD1140w	PFD1140w		PFD1140w	PFD1140w	PFD1140w	PFD1140w	PFD1140w		PFD1140w	PFD1140w	PFD1140w	PFD1140w	PFD1140w		PFD1140w	PFD1140w	PFD1140w	PFD1140w	PFD1140w		PFD1140w	PFD1140w
PFD1145c	PFD1145c	PFD1145c	PFD1145c	PFD1145c	PFD1145c	PFD1145c			PFD1145c		PFD1145c	PFD1145c	PFD1145c	PFD1145c	PFD1145c	PFD1145c		PFD1145c	PFD1145c	PFD1145c	PFD1145c	PFD1145c	PFD1145c	PFD1145c
PFD1150c	PFD1150c	PFD1150c	PFD1150c	PFD1150c	PFD1150c	PFD1150c			PFD1150c		PFD1150c	PFD1150c	PFD1150c	PFD1150c	PFD1150c	PFD1150c		PFD1150c	PFD1150c		PFD1150c	PFD1150c	PFD1150c	PFD1150c
PFD1155w	PFD1155w	PFD1155w	PFD1155w	PFD1155w	PFD1155w	PFD1155w			PFD1155w		PFD1155w	PFD1155w	PFD1155w	PFD1155w	PFD1155w	PFD1155w		PFD1155w	PFD1155w		PFD1155w		PFD1155w	PFD1155w
PFD1160w	PFD1160w		PFD1160w	PFD1160w	PFD1160w	PFD1160w			PFD1160w		PFD1160w	PFD1160w	PFD1160w		PFD1160w	PFD1160w		PFD1160w	PFD1160w		PFD1160w	PFD1160w		PFD1160w
PFD1165w	PFD1165w	PFD1165w	PFD1165w	PFD1165w	PFD1165w	PFD1165w			PFD1165w		PFD1165w	PFD1165w	PFD1165w		PFD1165w	PFD1165w		PFD1165w	PFD1165w		PFD1165w	PFD1165w		PFD1165w
PFD1170c	PFD1170c		PFD1170c	PFD1170c	PFD1170c	PFD1170c			PFD1170c		PFD1170c	PFD1170c	PFD1170c		PFD1170c	PFD1170c			PFD1170c					PFD1170c
PFD1175w	PFD1175w	PFD1175w	PFD1175w	PFD1175w	PFD1175w	PFD1175w			PFD1175w	PFD1175w	PFD1175w	PFD1175w	PFD1175w		PFD1175w	PFD1175w		PFD1175w	PFD1175w		PFD1175w	PFD1175w
PFD1180w	PFD1180w	PFD1180w	PFD1180w	PFD1180w	PFD1180w				PFD1180w		PFD1180w	PFD1180w	PFD1180w		PFD1180w	PFD1180w		PFD1180w	PFD1180w		PFD1180w	PFD1180w
PFD1185w	PFD1185w		PFD1185w		PFD1185w				PFD1185w		PFD1185w	PFD1185w	PFD1185w	PFD1185w	PFD1185w	PFD1185w		PFD1185w	PFD1185w	PFD1185w	PFD1185w	PFD1185w	PFD1185w	PFD1185w
PFD1195c	PFD1195c		PFD1195c	PFD1195c	PFD1195c	PFD1195c			PFD1195c		PFD1195c	PFD1195c	PFD1195c		PFD1195c			PFD1195c	PFD1195c		PFD1195c	PFD1195c		PFD1195c
PFD1200c	PFD1200c	PFD1200c	PFD1200c	PFD1200c	PFD1200c	PFD1200c			PFD1200c		PFD1200c	PFD1200c	PFD1200c		PFD1200c				PFD1200c			PFD1200c
PFD1205w	PFD1205w	PFD1205w	PFD1205w	PFD1205w	PFD1205w	PFD1205w			PFD1205w		PFD1205w	PFD1205w	PFD1205w		PFD1205w				PFD1205w			PFD1205w
PFD1210w	PFD1210w		PFD1210w	PFD1210w	PFD1210w	PFD1210w			PFD1210w		PFD1210w	PFD1210w	PFD1210w	PFD1210w	PFD1210w			PFD1210w	PFD1210w	PFD1210w	PFD1210w	PFD1210w	PFD1210w	PFD1210w
PFD1215w	PFD1215w	PFD1215w	PFD1215w		PFD1215w				PFD1215w		PFD1215w	PFD1215w	PFD1215w	PFD1215w	PFD1215w	PFD1215w		PFD1215w	PFD1215w		PFD1215w		PFD1215w	PFD1215w
PFD1220c	PFD1220c		PFD1220c		PFD1220c	PFD1220c			PFD1220c		PFD1220c	PFD1220c	PFD1220c		PFD1220c	PFD1220c		PFD1220c	PFD1220c		PFD1220c	PFD1220c
PFD1225w	PFD1225w		PFD1225w		PFD1225w	PFD1225w			PFD1225w		PFD1225w	PFD1225w	PFD1225w		PFD1225w	PFD1225w		PFD1225w	PFD1225w		PFD1225w	PFD1225w
PFD1230c	PFD1230c		PFD1230c	PFD1230c	PFD1230c				PFD1230c		PFD1230c	PFD1230c	PFD1230c		PFD1230c	PFD1230c		PFD1230c	PFD1230c	PFD1230c	PFD1230c	PFD1230c		PFD1230c
PFD1235w	PFD1235w		PFD1235w	PFD1235w	PFD1235w				PFD1235w	PFD1235w	PFD1235w	PFD1235w	PFD1235w		PFD1235w	PFD1235w		PFD1235w	PFD1235w	PFD1235w	PFD1235w	PFD1235w		PFD1235w
PFD1240w	PFD1240w		PFD1240w	PFD1240w	PFD1240w				PFD1240w		PFD1240w	PFD1240w	PFD1240w	PFD1240w	PFD1240w	PFD1240w		PFD1240w	PFD1240w		PFD1240w	PFD1240w	PFD1240w
PFD1245c	PFD1245c	PFD1245c	PFD1245c	PFD1245c	PFD1245c		PFD1245c		PFD1245c	PFD1245c	PFD1245c	PFD1245c	PFD1245c	PFD1245c	PFD1245c	PFD1245c	PFD1245c	PFD1245c	PFD1245c		PFD1245c	PFD1245c	PFD1245c	PFD1245c
PFE0005w	PFE0005w	PFE0005w	PFE0005w	PFE0005w	PFE0005w				PFE0005w	PFE0005w	PFE0005w	PFE0005w	PFE0005w	PFE0005w	PFE0005w	PFE0005w	PFE0005w	PFE0005w	PFE0005w		PFE0005w	PFE0005w	PFE0005w	PFE0005w
PFE0010c	PFE0010c		PFE0010c	PFE0010c	PFE0010c			PFE0010c	PFE0010c		PFE0010c	PFE0010c			PFE0010c	PFE0010c		PFE0010c	PFE0010c		PFE0010c			PFE0010c
PFE0015c	PFE0015c	PFE0015c	PFE0015c	PFE0015c	PFE0015c	PFE0015c			PFE0015c		PFE0015c	PFE0015c	PFE0015c		PFE0015c	PFE0015c		PFE0015c	PFE0015c		PFE0015c	PFE0015c		PFE0015c
PFE0020c	PFE0020c	PFE0020c	PFE0020c	PFE0020c	PFE0020c	PFE0020c			PFE0020c		PFE0020c	PFE0020c	PFE0020c		PFE0020c	PFE0020c		PFE0020c	PFE0020c		PFE0020c	PFE0020c		PFE0020c
PFE0025c	PFE0025c		PFE0025c	PFE0025c	PFE0025c	PFE0025c			PFE0025c		PFE0025c	PFE0025c	PFE0025c		PFE0025c	PFE0025c		PFE0025c	PFE0025c		PFE0025c	PFE0025c		PFE0025c
PFE0030c	PFE0030c		PFE0030c	PFE0030c	PFE0030c	PFE0030c			PFE0030c		PFE0030c	PFE0030c	PFE0030c		PFE0030c	PFE0030c		PFE0030c	PFE0030c		PFE0030c	PFE0030c		PFE0030c
PFE0035c	PFE0035c		PFE0035c	PFE0035c	PFE0035c	PFE0035c		PFE0035c	PFE0035c		PFE0035c	PFE0035c	PFE0035c	PFE0035c	PFE0035c	PFE0035c		PFE0035c	PFE0035c		PFE0035c	PFE0035c	PFE0035c	PFE0035c
PFE0040c	PFE0040c	PFE0040c	PFE0040c	PFE0040c	PFE0040c	PFE0040c			PFE0040c		PFE0040c	PFE0040c	PFE0040c		PFE0040c	PFE0040c		PFE0040c	PFE0040c	PFE0040c	PFE0040c	PFE0040c		PFE0040c
PFE0045c	PFE0045c		PFE0045c	PFE0045c	PFE0045c				PFE0045c	PFE0045c	PFE0045c	PFE0045c	PFE0045c	PFE0045c	PFE0045c	PFE0045c	PFE0045c	PFE0045c	PFE0045c	PFE0045c	PFE0045c	PFE0045c	PFE0045c
PFE0050w	PFE0050w		PFE0050w		PFE0050w	PFE0050w			PFE0050w	PFE0050w	PFE0050w	PFE0050w	PFE0050w		PFE0050w	PFE0050w	PFE0050w	PFE0050w	PFE0050w		PFE0050w	PFE0050w		PFE0050w
PFE0055c	PFE0055c		PFE0055c	PFE0055c	PFE0055c	PFE0055c			PFE0055c		PFE0055c	PFE0055c	PFE0055c		PFE0055c	PFE0055c		PFE0055c		PFE0055c	PFE0055c	PFE0055c		PFE0055c
PFE0060w	PFE0060w	PFE0060w	PFE0060w	PFE0060w	PFE0060w				PFE0060w		PFE0060w	PFE0060w	PFE0060w	PFE0060w	PFE0060w	PFE0060w		PFE0060w	PFE0060w		PFE0060w	PFE0060w	PFE0060w	PFE0060w
PFE0065w	PFE0065w	PFE0065w	PFE0065w	PFE0065w	PFE0065w	PFE0065w			PFE0065w		PFE0065w	PFE0065w	PFE0065w		PFE0065w	PFE0065w		PFE0065w	PFE0065w		PFE0065w	PFE0065w		PFE0065w
PFE0070w	PFE0070w		PFE0070w	PFE0070w	PFE0070w				PFE0070w		PFE0070w	PFE0070w	PFE0070w		PFE0070w	PFE0070w		PFE0070w	PFE0070w		PFE0070w	PFE0070w		PFE0070w
PFE0075c	PFE0075c	PFE0075c	PFE0075c	PFE0075c	PFE0075c	PFE0075c			PFE0075c	PFE0075c	PFE0075c	PFE0075c	PFE0075c		PFE0075c	PFE0075c	PFE0075c	PFE0075c	PFE0075c		PFE0075c	PFE0075c		PFE0075c
PFE0080c	PFE0080c		PFE0080c	PFE0080c	PFE0080c				PFE0080c	PFE0080c	PFE0080c	PFE0080c	PFE0080c	PFE0080c	PFE0080c	PFE0080c	PFE0080c	PFE0080c	PFE0080c		PFE0080c	PFE0080c	PFE0080c	PFE0080c
PFE0085c	PFE0085c		PFE0085c		PFE0085c	PFE0085c			PFE0085c		PFE0085c	PFE0085c	PFE0085c	PFE0085c	PFE0085c	PFE0085c		PFE0085c	PFE0085c		PFE0085c	PFE0085c	PFE0085c	PFE0085c
PFE0090w	PFE0090w		PFE0090w		PFE0090w	PFE0090w			PFE0090w		PFE0090w	PFE0090w	PFE0090w	PFE0090w	PFE0090w	PFE0090w		PFE0090w	PFE0090w		PFE0090w	PFE0090w	PFE0090w	PFE0090w
PFE0095c	PFE0095c		PFE0095c		PFE0095c	PFE0095c			PFE0095c		PFE0095c	PFE0095c	PFE0095c		PFE0095c	PFE0095c		PFE0095c	PFE0095c		PFE0095c	PFE0095c
PFE0100w	PFE0100w		PFE0100w		PFE0100w	PFE0100w			PFE0100w		PFE0100w	PFE0100w	PFE0100w		PFE0100w	PFE0100w		PFE0100w	PFE0100w		PFE0100w	PFE0100w
PFE0105c	PFE0105c		PFE0105c		PFE0105c	PFE0105c			PFE0105c		PFE0105c	PFE0105c	PFE0105c	PFE0105c	PFE0105c			PFE0105c	PFE0105c		PFE0105c		PFE0105c	PFE0105c
PFE0110w	PFE0110w		PFE0110w		PFE0110w	PFE0110w			PFE0110w		PFE0110w	PFE0110w	PFE0110w	PFE0110w	PFE0110w			PFE0110w	PFE0110w		PFE0110w		PFE0110w	PFE0110w
PFE0115c	PFE0115c		PFE0115c	PFE0115c	PFE0115c	PFE0115c			PFE0115c		PFE0115c	PFE0115c	PFE0115c		PFE0115c	PFE0115c		PFE0115c	PFE0115c		PFE0115c	PFE0115c		PFE0115c
PFE0120c	PFE0120c	PFE0120c	PFE0120c	PFE0120c	PFE0120c	PFE0120c			PFE0120c		PFE0120c	PFE0120c	PFE0120c		PFE0120c	PFE0120c		PFE0120c	PFE0120c	PFE0120c	PFE0120c	PFE0120c		PFE0120c
PFE0125w	PFE0125w	PFE0125w	PFE0125w	PFE0125w	PFE0125w	PFE0125w			PFE0125w		PFE0125w	PFE0125w	PFE0125w	PFE0125w	PFE0125w	PFE0125w		PFE0125w	PFE0125w	PFE0125w	PFE0125w	PFE0125w	PFE0125w	PFE0125w
DUP1-PFE0130c	DUP1-PFE0130c		DUP1-PFE0130c	DUP1-PFE0130c					DUP1-PFE0130c	DUP1-PFE0130c	DUP1-PFE0130c	DUP1-PFE0130c	DUP1-PFE0130c	DUP1-PFE0130c	DUP1-PFE0130c			DUP1-PFE0130c	DUP1-PFE0130c	DUP1-PFE0130c	DUP1-PFE0130c	DUP1-PFE0130c	DUP1-PFE0130c
PFE0130c	PFE0130c		PFE0130c	PFE0130c	PFE0130c	PFE0130c		PFE0130c	PFE0130c		PFE0130c	PFE0130c	PFE0130c		PFE0130c			PFE0130c	PFE0130c	PFE0130c	PFE0130c	PFE0130c		PFE0130c
PFE0135w	PFE0135w		PFE0135w	PFE0135w	PFE0135w			PFE0135w	PFE0135w		PFE0135w	PFE0135w	PFE0135w		PFE0135w			PFE0135w	PFE0135w	PFE0135w	PFE0135w	PFE0135w		PFE0135w
PFE0140c	PFE0140c		PFE0140c	PFE0140c	PFE0140c				PFE0140c		PFE0140c	PFE0140c	PFE0140c	PFE0140c	PFE0140c			PFE0140c	PFE0140c		PFE0140c	PFE0140c	PFE0140c	PFE0140c
PFE0145w	PFE0145w		PFE0145w	PFE0145w	PFE0145w				PFE0145w		PFE0145w	PFE0145w	PFE0145w	PFE0145w	PFE0145w			PFE0145w	PFE0145w		PFE0145w	PFE0145w	PFE0145w	PFE0145w
PFE0150c	PFE0150c		PFE0150c	PFE0150c	PFE0150c	PFE0150c	PFE0150c		PFE0150c		PFE0150c	PFE0150c	PFE0150c	PFE0150c	PFE0150c	PFE0150c		PFE0150c	PFE0150c		PFE0150c	PFE0150c	PFE0150c
PFE0155w	PFE0155w		PFE0155w	PFE0155w	PFE0155w	PFE0155w	PFE0155w		PFE0155w		PFE0155w	PFE0155w	PFE0155w	PFE0155w	PFE0155w	PFE0155w		PFE0155w	PFE0155w		PFE0155w	PFE0155w	PFE0155w
PFE0160c	PFE0160c		PFE0160c	PFE0160c	PFE0160c	PFE0160c			PFE0160c		PFE0160c	PFE0160c	PFE0160c	PFE0160c	PFE0160c			PFE0160c	PFE0160c		PFE0160c	PFE0160c	PFE0160c	PFE0160c
PFE0165w	PFE0165w	PFE0165w	PFE0165w	PFE0165w	PFE0165w	PFE0165w			PFE0165w	PFE0165w	PFE0165w	PFE0165w	PFE0165w	PFE0165w	PFE0165w	PFE0165w	PFE0165w	PFE0165w	PFE0165w		PFE0165w	PFE0165w	PFE0165w	PFE0165w
PFE0170c	PFE0170c	PFE0170c	PFE0170c	PFE0170c	PFE0170c	PFE0170c		PFE0170c			PFE0170c	PFE0170c	PFE0170c		PFE0170c	PFE0170c		PFE0170c	PFE0170c		PFE0170c	PFE0170c		PFE0170c
PFE0175c	PFE0175c	PFE0175c	PFE0175c		PFE0175c	PFE0175c	PFE0175c		PFE0175c	PFE0175c	PFE0175c	PFE0175c	PFE0175c	PFE0175c		PFE0175c	PFE0175c	PFE0175c	PFE0175c		PFE0175c	PFE0175c	PFE0175c	PFE0175c
PFE0185c	PFE0185c		PFE0185c	PFE0185c	PFE0185c	PFE0185c					PFE0185c	PFE0185c			PFE0185c	PFE0185c		PFE0185c	PFE0185c		PFE0185c			PFE0185c
PFE0190c	PFE0190c		PFE0190c	PFE0190c	PFE0190c	PFE0190c			PFE0190c		PFE0190c	PFE0190c	PFE0190c		PFE0190c	PFE0190c		PFE0190c	PFE0190c	PFE0190c	PFE0190c	PFE0190c		PFE0190c
PFE0195w	PFE0195w		PFE0195w	PFE0195w	PFE0195w	PFE0195w			PFE0195w		PFE0195w	PFE0195w	PFE0195w		PFE0195w	PFE0195w		PFE0195w	PFE0195w	PFE0195w	PFE0195w	PFE0195w		PFE0195w
PFE0200c	PFE0200c		PFE0200c		PFE0200c				PFE0200c	PFE0200c	PFE0200c	PFE0200c	PFE0200c					PFE0200c	PFE0200c		PFE0200c	PFE0200c		PFE0200c
PFE0205w	PFE0205w		PFE0205w		PFE0205w				PFE0205w	PFE0205w	PFE0205w	PFE0205w	PFE0205w					PFE0205w	PFE0205w		PFE0205w	PFE0205w		PFE0205w
PFE0210c	PFE0210c		PFE0210c		PFE0210c	PFE0210c			PFE0210c		PFE0210c	PFE0210c	PFE0210c	PFE0210c	PFE0210c	PFE0210c		PFE0210c	PFE0210c		PFE0210c	PFE0210c	PFE0210c
PFE0215w	PFE0215w		PFE0215w		PFE0215w	PFE0215w			PFE0215w		PFE0215w	PFE0215w	PFE0215w	PFE0215w	PFE0215w	PFE0215w		PFE0215w	PFE0215w		PFE0215w	PFE0215w	PFE0215w
PFE0220w	PFE0220w		PFE0220w		PFE0220w	PFE0220w			PFE0220w		PFE0220w	PFE0220w	PFE0220w		PFE0220w			PFE0220w	PFE0220w		PFE0220w			PFE0220w
PFE0225w	PFE0225w		PFE0225w	PFE0225w	PFE0225w				PFE0225w		PFE0225w	PFE0225w	PFE0225w			PFE0225w		PFE0225w	PFE0225w		PFE0225w			PFE0225w
PFE0230w	PFE0230w		PFE0230w	PFE0230w	PFE0230w	PFE0230w					PFE0230w	PFE0230w	PFE0230w	PFE0230w	PFE0230w	PFE0230w		PFE0230w	PFE0230w		PFE0230w	PFE0230w	PFE0230w	PFE0230w
PFE0235c	PFE0235c	PFE0235c	PFE0235c	PFE0235c	PFE0235c				PFE0235c	PFE0235c	PFE0235c	PFE0235c	PFE0235c	PFE0235c	PFE0235c	PFE0235c		PFE0235c	PFE0235c		PFE0235c	PFE0235c	PFE0235c	PFE0235c
PFE0240w	PFE0240w	PFE0240w	PFE0240w	PFE0240w	PFE0240w				PFE0240w	PFE0240w	PFE0240w	PFE0240w	PFE0240w	PFE0240w	PFE0240w	PFE0240w		PFE0240w	PFE0240w		PFE0240w	PFE0240w	PFE0240w	PFE0240w
PFE0245c	PFE0245c		PFE0245c		PFE0245c	PFE0245c			PFE0245c		PFE0245c	PFE0245c	PFE0245c		PFE0245c	PFE0245c		PFE0245c	PFE0245c	PFE0245c	PFE0245c	PFE0245c		PFE0245c
PFE0250w	PFE0250w		PFE0250w	PFE0250w	PFE0250w	PFE0250w			PFE0250w		PFE0250w	PFE0250w	PFE0250w		PFE0250w	PFE0250w		PFE0250w	PFE0250w	PFE0250w	PFE0250w	PFE0250w
PFE0255w	PFE0255w		PFE0255w	PFE0255w	PFE0255w		PFE0255w		PFE0255w		PFE0255w	PFE0255w	PFE0255w	PFE0255w	PFE0255w			PFE0255w	PFE0255w		PFE0255w	PFE0255w	PFE0255w	PFE0255w
PFE0260w	PFE0260w	PFE0260w	PFE0260w	PFE0260w	PFE0260w	PFE0260w			PFE0260w		PFE0260w	PFE0260w	PFE0260w	PFE0260w	PFE0260w	PFE0260w		PFE0260w	PFE0260w	PFE0260w	PFE0260w	PFE0260w	PFE0260w	PFE0260w
PFE0265c	PFE0265c		PFE0265c	PFE0265c	PFE0265c	PFE0265c			PFE0265c		PFE0265c	PFE0265c	PFE0265c	PFE0265c	PFE0265c			PFE0265c	PFE0265c		PFE0265c	PFE0265c	PFE0265c	PFE0265c
PFE0270c	PFE0270c		PFE0270c		PFE0270c	PFE0270c		PFE0270c			PFE0270c	PFE0270c	PFE0270c	PFE0270c	PFE0270c	PFE0270c		PFE0270c	PFE0270c		PFE0270c	PFE0270c	PFE0270c	PFE0270c
PFE0275w	PFE0275w		PFE0275w		PFE0275w	PFE0275w		PFE0275w	PFE0275w		PFE0275w	PFE0275w	PFE0275w	PFE0275w	PFE0275w	PFE0275w		PFE0275w	PFE0275w		PFE0275w	PFE0275w	PFE0275w	PFE0275w
PFE0280c	PFE0280c		PFE0280c	PFE0280c	PFE0280c	PFE0280c	PFE0280c				PFE0280c	PFE0280c	PFE0280c	PFE0280c	PFE0280c			PFE0280c	PFE0280c		PFE0280c	PFE0280c	PFE0280c	PFE0280c
PFE0285c	PFE0285c		PFE0285c	PFE0285c	PFE0285c	PFE0285c			PFE0285c	PFE0285c	PFE0285c	PFE0285c	PFE0285c	PFE0285c	PFE0285c	PFE0285c	PFE0285c	PFE0285c	PFE0285c		PFE0285c	PFE0285c	PFE0285c	PFE0285c
PFE0290c	PFE0290c		PFE0290c		PFE0290c						PFE0290c	PFE0290c	PFE0290c	PFE0290c	PFE0290c	PFE0290c		PFE0290c	PFE0290c		PFE0290c	PFE0290c	PFE0290c	PFE0290c
PFE0295w	PFE0295w		PFE0295w		PFE0295w				PFE0295w	PFE0295w	PFE0295w	PFE0295w	PFE0295w	PFE0295w	PFE0295w	PFE0295w	PFE0295w	PFE0295w	PFE0295w		PFE0295w	PFE0295w	PFE0295w	PFE0295w
PFE0300c	PFE0300c		PFE0300c		PFE0300c	PFE0300c	PFE0300c		PFE0300c	PFE0300c	PFE0300c	PFE0300c	PFE0300c		PFE0300c		PFE0300c	PFE0300c	PFE0300c		PFE0300c	PFE0300c
PFE0305w	PFE0305w		PFE0305w		PFE0305w	PFE0305w	PFE0305w		PFE0305w	PFE0305w	PFE0305w	PFE0305w	PFE0305w		PFE0305w		PFE0305w	PFE0305w	PFE0305w		PFE0305w	PFE0305w
PFE0310c	PFE0310c		PFE0310c	PFE0310c	PFE0310c	PFE0310c					PFE0310c	PFE0310c	PFE0310c	PFE0310c	PFE0310c	PFE0310c		PFE0310c	PFE0310c		PFE0310c	PFE0310c	PFE0310c	PFE0310c
PFE0315c	PFE0315c		PFE0315c	PFE0315c	PFE0315c	PFE0315c			PFE0315c		PFE0315c	PFE0315c	PFE0315c	PFE0315c	PFE0315c	PFE0315c		PFE0315c	PFE0315c		PFE0315c	PFE0315c	PFE0315c	PFE0315c
PFE0320w	PFE0320w		PFE0320w	PFE0320w	PFE0320w	PFE0320w			PFE0320w		PFE0320w	PFE0320w	PFE0320w	PFE0320w	PFE0320w	PFE0320w		PFE0320w	PFE0320w		PFE0320w	PFE0320w	PFE0320w	PFE0320w
PFE0328w	PFE0328w	PFE0328w	PFE0328w	PFE0328w	PFE0328w				PFE0328w	PFE0328w	PFE0328w	PFE0328w	PFE0328w		PFE0328w	PFE0328w	PFE0328w	PFE0328w	PFE0328w	PFE0328w	PFE0328w	PFE0328w	PFE0328w	PFE0328w
PFE0330w	PFE0330w	PFE0330w	PFE0330w	PFE0330w	PFE0330w				PFE0330w	PFE0330w	PFE0330w	PFE0330w	PFE0330w		PFE0330w	PFE0330w	PFE0330w	PFE0330w	PFE0330w	PFE0330w	PFE0330w	PFE0330w	PFE0330w	PFE0330w
PFE0335w	PFE0335w	PFE0335w	PFE0335w	PFE0335w	PFE0335w	PFE0335w	PFE0335w		PFE0335w		PFE0335w	PFE0335w	PFE0335w	PFE0335w	PFE0335w	PFE0335w		PFE0335w	PFE0335w		PFE0335w	PFE0335w	PFE0335w	PFE0335w
PFE0340c	PFE0340c		PFE0340c	PFE0340c	PFE0340c	PFE0340c			PFE0340c	PFE0340c	PFE0340c	PFE0340c	PFE0340c	PFE0340c	PFE0340c		PFE0340c	PFE0340c	PFE0340c		PFE0340c	PFE0340c	PFE0340c	PFE0340c
PFE0345c	PFE0345c		PFE0345c	PFE0345c	PFE0345c	PFE0345c			PFE0345c		PFE0345c	PFE0345c	PFE0345c	PFE0345c	PFE0345c			PFE0345c	PFE0345c		PFE0345c	PFE0345c	PFE0345c	PFE0345c
PFE0350c	PFE0350c		PFE0350c	PFE0350c	PFE0350c	PFE0350c			PFE0350c		PFE0350c	PFE0350c	PFE0350c		PFE0350c			PFE0350c	PFE0350c		PFE0350c	PFE0350c
PFE0355c	PFE0355c		PFE0355c	PFE0355c	PFE0355c	PFE0355c			PFE0355c	PFE0355c	PFE0355c	PFE0355c	PFE0355c	PFE0355c	PFE0355c	PFE0355c	PFE0355c	PFE0355c	PFE0355c		PFE0355c	PFE0355c	PFE0355c	PFE0355c
PFE0360c	PFE0360c	PFE0360c	PFE0360c	PFE0360c	PFE0360c	PFE0360c	PFE0360c		PFE0360c	PFE0360c	PFE0360c	PFE0360c	PFE0360c		PFE0360c			PFE0360c	PFE0360c		PFE0360c	PFE0360c		PFE0360c
PFE0365c	PFE0365c	PFE0365c	PFE0365c	PFE0365c	PFE0365c		PFE0365c		PFE0365c		PFE0365c	PFE0365c	PFE0365c	PFE0365c	PFE0365c	PFE0365c		PFE0365c	PFE0365c	PFE0365c	PFE0365c	PFE0365c	PFE0365c	PFE0365c
PFE0370c	PFE0370c		PFE0370c	PFE0370c	PFE0370c	PFE0370c	PFE0370c		PFE0370c		PFE0370c	PFE0370c	PFE0370c	PFE0370c	PFE0370c	PFE0370c		PFE0370c	PFE0370c		PFE0370c	PFE0370c	PFE0370c	PFE0370c
PFE0375w	PFE0375w		PFE0375w	PFE0375w	PFE0375w	PFE0375w			PFE0375w		PFE0375w	PFE0375w	PFE0375w	PFE0375w	PFE0375w	PFE0375w		PFE0375w	PFE0375w		PFE0375w	PFE0375w	PFE0375w	PFE0375w
PFE0380c	PFE0380c		PFE0380c	PFE0380c	PFE0380c	PFE0380c			PFE0380c		PFE0380c	PFE0380c	PFE0380c	PFE0380c	PFE0380c			PFE0380c	PFE0380c		PFE0380c	PFE0380c	PFE0380c	PFE0380c
PFE0385w	PFE0385w		PFE0385w	PFE0385w	PFE0385w	PFE0385w			PFE0385w		PFE0385w	PFE0385w	PFE0385w	PFE0385w	PFE0385w	PFE0385w		PFE0385w	PFE0385w		PFE0385w	PFE0385w	PFE0385w	PFE0385w
PFE0390w	PFE0390w		PFE0390w	PFE0390w	PFE0390w	PFE0390w			PFE0390w		PFE0390w	PFE0390w	PFE0390w			PFE0390w		PFE0390w	PFE0390w		PFE0390w	PFE0390w		PFE0390w
PFE0395c	PFE0395c	PFE0395c	PFE0395c	PFE0395c	PFE0395c				PFE0395c	PFE0395c	PFE0395c	PFE0395c	PFE0395c	PFE0395c	PFE0395c	PFE0395c		PFE0395c	PFE0395c	PFE0395c	PFE0395c	PFE0395c	PFE0395c	PFE0395c
PFE0400w	PFE0400w	PFE0400w	PFE0400w	PFE0400w	PFE0400w				PFE0400w	PFE0400w	PFE0400w	PFE0400w	PFE0400w	PFE0400w	PFE0400w	PFE0400w		PFE0400w	PFE0400w	PFE0400w	PFE0400w	PFE0400w	PFE0400w	PFE0400w
PFE0405c	PFE0405c	PFE0405c	PFE0405c	PFE0405c	PFE0405c	PFE0405c		PFE0405c	PFE0405c	PFE0405c	PFE0405c	PFE0405c	PFE0405c	PFE0405c	PFE0405c	PFE0405c		PFE0405c	PFE0405c		PFE0405c	PFE0405c	PFE0405c	PFE0405c
PFE0410w	PFE0410w	PFE0410w	PFE0410w	PFE0410w	PFE0410w	PFE0410w			PFE0410w		PFE0410w	PFE0410w	PFE0410w	PFE0410w	PFE0410w	PFE0410w		PFE0410w	PFE0410w		PFE0410w	PFE0410w	PFE0410w	PFE0410w
PFE0415w	PFE0415w	PFE0415w	PFE0415w	PFE0415w	PFE0415w	PFE0415w			PFE0415w	PFE0415w	PFE0415w	PFE0415w	PFE0415w		PFE0415w			PFE0415w	PFE0415w	PFE0415w	PFE0415w	PFE0415w		PFE0415w
PFE0420c	PFE0420c	PFE0420c	PFE0420c	PFE0420c	PFE0420c	PFE0420c			PFE0420c		PFE0420c	PFE0420c	PFE0420c		PFE0420c	PFE0420c		PFE0420c	PFE0420c	PFE0420c	PFE0420c	PFE0420c
PFE0425w	PFE0425w	PFE0425w	PFE0425w	PFE0425w	PFE0425w	PFE0425w			PFE0425w		PFE0425w	PFE0425w	PFE0425w		PFE0425w	PFE0425w		PFE0425w	PFE0425w	PFE0425w	PFE0425w	PFE0425w
PFE0430w	PFE0430w		PFE0430w		PFE0430w	PFE0430w			PFE0430w		PFE0430w	PFE0430w	PFE0430w		PFE0430w	PFE0430w		PFE0430w	PFE0430w		PFE0430w	PFE0430w		PFE0430w
PFE0435c	PFE0435c		PFE0435c	PFE0435c	PFE0435c	PFE0435c	PFE0435c		PFE0435c	PFE0435c	PFE0435c	PFE0435c		PFE0435c	PFE0435c	PFE0435c	PFE0435c	PFE0435c	PFE0435c		PFE0435c	PFE0435c	PFE0435c	PFE0435c
PFE0440w	PFE0440w		PFE0440w	PFE0440w	PFE0440w	PFE0440w	PFE0440w		PFE0440w	PFE0440w	PFE0440w	PFE0440w	PFE0440w	PFE0440w	PFE0440w	PFE0440w	PFE0440w	PFE0440w	PFE0440w		PFE0440w	PFE0440w	PFE0440w	PFE0440w
PFE0445c	PFE0445c		PFE0445c	PFE0445c	PFE0445c	PFE0445c			PFE0445c		PFE0445c	PFE0445c	PFE0445c	PFE0445c	PFE0445c	PFE0445c		PFE0445c	PFE0445c		PFE0445c	PFE0445c	PFE0445c	PFE0445c
PFE0450w	PFE0450w		PFE0450w	PFE0450w	PFE0450w	PFE0450w			PFE0450w		PFE0450w	PFE0450w	PFE0450w	PFE0450w	PFE0450w	PFE0450w		PFE0450w	PFE0450w		PFE0450w	PFE0450w	PFE0450w	PFE0450w
PFE0455w	PFE0455w		PFE0455w		PFE0455w	PFE0455w			PFE0455w	PFE0455w	PFE0455w	PFE0455w			PFE0455w		PFE0455w	PFE0455w	PFE0455w		PFE0455w		PFE0455w	PFE0455w
PFE0460c	PFE0460c		PFE0460c		PFE0460c						PFE0460c	PFE0460c	PFE0460c		PFE0460c	PFE0460c		PFE0460c	PFE0460c		PFE0460c			PFE0460c
PFE0465c	PFE0465c		PFE0465c	PFE0465c	PFE0465c	PFE0465c			PFE0465c		PFE0465c	PFE0465c	PFE0465c		PFE0465c	PFE0465c		PFE0465c	PFE0465c		PFE0465c	PFE0465c		PFE0465c
PFE0470w	PFE0470w		PFE0470w	PFE0470w	PFE0470w	PFE0470w			PFE0470w		PFE0470w	PFE0470w	PFE0470w	PFE0470w	PFE0470w	PFE0470w		PFE0470w	PFE0470w		PFE0470w	PFE0470w	PFE0470w	PFE0470w
PFE0475w	PFE0475w				PFE0475w	PFE0475w			PFE0475w	PFE0475w	PFE0475w	PFE0475w	PFE0475w	PFE0475w		PFE0475w		PFE0475w	PFE0475w	PFE0475w	PFE0475w	PFE0475w	PFE0475w	PFE0475w
PFE0480c	PFE0480c		PFE0480c		PFE0480c	PFE0480c			PFE0480c		PFE0480c	PFE0480c	PFE0480c	PFE0480c	PFE0480c	PFE0480c		PFE0480c	PFE0480c		PFE0480c	PFE0480c	PFE0480c
PFE0485w	PFE0485w		PFE0485w	PFE0485w	PFE0485w	PFE0485w			PFE0485w		PFE0485w	PFE0485w	PFE0485w	PFE0485w	PFE0485w	PFE0485w		PFE0485w	PFE0485w		PFE0485w	PFE0485w	PFE0485w	PFE0485w
PFE0490w	PFE0490w		PFE0490w	PFE0490w	PFE0490w						PFE0490w	PFE0490w	PFE0490w		PFE0490w			PFE0490w	PFE0490w		PFE0490w	PFE0490w
PFE0495w	PFE0495w		PFE0495w	PFE0495w	PFE0495w				PFE0495w		PFE0495w	PFE0495w		PFE0495w	PFE0495w			PFE0495w	PFE0495w		PFE0495w	PFE0495w	PFE0495w	PFE0495w
PFE0500c	PFE0500c	PFE0500c	PFE0500c		PFE0500c	PFE0500c			PFE0500c	PFE0500c	PFE0500c	PFE0500c	PFE0500c	PFE0500c	PFE0500c			PFE0500c	PFE0500c		PFE0500c	PFE0500c	PFE0500c	PFE0500c
PFE0505w	PFE0505w		PFE0505w	PFE0505w	PFE0505w	PFE0505w			PFE0505w		PFE0505w	PFE0505w	PFE0505w	PFE0505w	PFE0505w	PFE0505w		PFE0505w	PFE0505w		PFE0505w	PFE0505w	PFE0505w	PFE0505w
PFE0510c	PFE0510c		PFE0510c	PFE0510c	PFE0510c	PFE0510c			PFE0510c	PFE0510c	PFE0510c	PFE0510c	PFE0510c		PFE0510c	PFE0510c		PFE0510c	PFE0510c		PFE0510c	PFE0510c		PFE0510c
PFE0515w	PFE0515w		PFE0515w	PFE0515w	PFE0515w	PFE0515w			PFE0515w		PFE0515w	PFE0515w	PFE0515w		PFE0515w	PFE0515w		PFE0515w	PFE0515w		PFE0515w	PFE0515w		PFE0515w
PFE0520c	PFE0520c		PFE0520c		PFE0520c	PFE0520c			PFE0520c	PFE0520c	PFE0520c	PFE0520c	PFE0520c	PFE0520c	PFE0520c	PFE0520c		PFE0520c	PFE0520c		PFE0520c	PFE0520c	PFE0520c	PFE0520c
PFE0530w	PFE0530w		PFE0530w	PFE0530w	PFE0530w	PFE0530w			PFE0530w	PFE0530w	PFE0530w	PFE0530w	PFE0530w	PFE0530w	PFE0530w	PFE0530w		PFE0530w	PFE0530w		PFE0530w	PFE0530w	PFE0530w	PFE0530w
PFE0535w	PFE0535w		PFE0535w		PFE0535w				PFE0535w	PFE0535w	PFE0535w	PFE0535w	PFE0535w	PFE0535w	PFE0535w			PFE0535w	PFE0535w		PFE0535w	PFE0535w	PFE0535w	PFE0535w
PFE0540w	PFE0540w		PFE0540w		PFE0540w	PFE0540w			PFE0540w		PFE0540w	PFE0540w	PFE0540w	PFE0540w	PFE0540w	PFE0540w		PFE0540w	PFE0540w		PFE0540w		PFE0540w	PFE0540w
PFE0545c	PFE0545c		PFE0545c		PFE0545c				PFE0545c		PFE0545c	PFE0545c	PFE0545c	PFE0545c	PFE0545c			PFE0545c	PFE0545c	PFE0545c	PFE0545c		PFE0545c	PFE0545c
PFE0550w	PFE0550w		PFE0550w		PFE0550w				PFE0550w		PFE0550w	PFE0550w	PFE0550w	PFE0550w				PFE0550w	PFE0550w	PFE0550w	PFE0550w		PFE0550w	PFE0550w
PFE0555w	PFE0555w		PFE0555w	PFE0555w	PFE0555w	PFE0555w			PFE0555w		PFE0555w	PFE0555w	PFE0555w	PFE0555w	PFE0555w			PFE0555w	PFE0555w		PFE0555w	PFE0555w	PFE0555w	PFE0555w
PFE0560c	PFE0560c	PFE0560c	PFE0560c	PFE0560c	PFE0560c	PFE0560c				PFE0560c	PFE0560c	PFE0560c	PFE0560c	PFE0560c	PFE0560c	PFE0560c		PFE0560c	PFE0560c		PFE0560c	PFE0560c	PFE0560c	PFE0560c
PFE0565w	PFE0565w	PFE0565w	PFE0565w	PFE0565w	PFE0565w	PFE0565w			PFE0565w		PFE0565w	PFE0565w	PFE0565w	PFE0565w	PFE0565w	PFE0565w		PFE0565w	PFE0565w	PFE0565w	PFE0565w	PFE0565w	PFE0565w	PFE0565w
PFE0570w	PFE0570w		PFE0570w		PFE0570w				PFE0570w		PFE0570w	PFE0570w	PFE0570w	PFE0570w	PFE0570w			PFE0570w	PFE0570w		PFE0570w	PFE0570w	PFE0570w	PFE0570w
PFE0575c	PFE0575c	PFE0575c	PFE0575c	PFE0575c	PFE0575c				PFE0575c	PFE0575c	PFE0575c	PFE0575c	PFE0575c		PFE0575c			PFE0575c	PFE0575c	PFE0575c	PFE0575c	PFE0575c
PFE0580w	PFE0580w	PFE0580w	PFE0580w	PFE0580w	PFE0580w				PFE0580w	PFE0580w	PFE0580w	PFE0580w	PFE0580w		PFE0580w			PFE0580w	PFE0580w	PFE0580w	PFE0580w	PFE0580w
PFE0585c	PFE0585c		PFE0585c		PFE0585c	PFE0585c			PFE0585c	PFE0585c	PFE0585c	PFE0585c	PFE0585c		PFE0585c	PFE0585c		PFE0585c	PFE0585c		PFE0585c	PFE0585c		PFE0585c
PFE0590w	PFE0590w		PFE0590w	PFE0590w	PFE0590w	PFE0590w			PFE0590w	PFE0590w	PFE0590w	PFE0590w	PFE0590w		PFE0590w	PFE0590w		PFE0590w	PFE0590w		PFE0590w	PFE0590w		PFE0590w
PFE0595w	PFE0595w		PFE0595w		PFE0595w				PFE0595w		PFE0595w	PFE0595w	PFE0595w					PFE0595w	PFE0595w		PFE0595w			PFE0595w
PFE0600c	PFE0600c				PFE0600c	PFE0600c			PFE0600c		PFE0600c	PFE0600c		PFE0600c	PFE0600c	PFE0600c		PFE0600c	PFE0600c		PFE0600c		PFE0600c
PFE0605c	PFE0605c		PFE0605c	PFE0605c	PFE0605c	PFE0605c			PFE0605c		PFE0605c	PFE0605c	PFE0605c	PFE0605c	PFE0605c	PFE0605c		PFE0605c	PFE0605c		PFE0605c	PFE0605c	PFE0605c	PFE0605c
PFE0610c	PFE0610c		PFE0610c	PFE0610c	PFE0610c	PFE0610c			PFE0610c		PFE0610c	PFE0610c	PFE0610c	PFE0610c	PFE0610c	PFE0610c		PFE0610c	PFE0610c	PFE0610c	PFE0610c	PFE0610c	PFE0610c	PFE0610c
PFE0615w	PFE0615w		PFE0615w	PFE0615w	PFE0615w	PFE0615w			PFE0615w		PFE0615w	PFE0615w	PFE0615w	PFE0615w	PFE0615w	PFE0615w		PFE0615w	PFE0615w	PFE0615w	PFE0615w	PFE0615w	PFE0615w	PFE0615w
PFE0620c	PFE0620c		PFE0620c	PFE0620c	PFE0620c	PFE0620c			PFE0620c		PFE0620c	PFE0620c	PFE0620c	PFE0620c	PFE0620c	PFE0620c		PFE0620c	PFE0620c		PFE0620c	PFE0620c	PFE0620c	PFE0620c
PFE0625w	PFE0625w		PFE0625w	PFE0625w	PFE0625w	PFE0625w			PFE0625w		PFE0625w	PFE0625w	PFE0625w	PFE0625w	PFE0625w	PFE0625w		PFE0625w	PFE0625w		PFE0625w	PFE0625w	PFE0625w	PFE0625w
PFE0630c	PFE0630c	PFE0630c	PFE0630c		PFE0630c	PFE0630c					PFE0630c	PFE0630c				PFE0630c		PFE0630c			PFE0630c	PFE0630c
PFE0635c	PFE0635c		PFE0635c		PFE0635c	PFE0635c			PFE0635c		PFE0635c	PFE0635c	PFE0635c	PFE0635c	PFE0635c	PFE0635c		PFE0635c	PFE0635c		PFE0635c	PFE0635c	PFE0635c	PFE0635c
PFE0640w	PFE0640w		PFE0640w		PFE0640w	PFE0640w			PFE0640w		PFE0640w	PFE0640w	PFE0640w	PFE0640w	PFE0640w	PFE0640w		PFE0640w	PFE0640w		PFE0640w	PFE0640w	PFE0640w	PFE0640w
PFE0645w	PFE0645w		PFE0645w		PFE0645w	PFE0645w			PFE0645w		PFE0645w	PFE0645w	PFE0645w	PFE0645w	PFE0645w	PFE0645w		PFE0645w	PFE0645w		PFE0645w	PFE0645w	PFE0645w	PFE0645w
PFE0650c	PFE0650c		PFE0650c	PFE0650c	PFE0650c					PFE0650c	PFE0650c	PFE0650c	PFE0650c	PFE0650c		PFE0650c		PFE0650c	PFE0650c		PFE0650c	PFE0650c	PFE0650c	PFE0650c
PFE0655w	PFE0655w		PFE0655w	PFE0655w	PFE0655w					PFE0655w	PFE0655w	PFE0655w	PFE0655w	PFE0655w		PFE0655w		PFE0655w	PFE0655w		PFE0655w	PFE0655w	PFE0655w	PFE0655w
PFE0660c	PFE0660c		PFE0660c	PFE0660c	PFE0660c				PFE0660c		PFE0660c	PFE0660c	PFE0660c			PFE0660c		PFE0660c	PFE0660c		PFE0660c
PFE0665c	PFE0665c		PFE0665c		PFE0665c	PFE0665c			PFE0665c	PFE0665c	PFE0665c	PFE0665c	PFE0665c		PFE0665c			PFE0665c	PFE0665c		PFE0665c	PFE0665c
PFE0670w	PFE0670w		PFE0670w		PFE0670w				PFE0670w		PFE0670w	PFE0670w	PFE0670w		PFE0670w				PFE0670w			PFE0670w
PFE0675c	PFE0675c		PFE0675c	PFE0675c	PFE0675c	PFE0675c					PFE0675c	PFE0675c	PFE0675c	PFE0675c	PFE0675c	PFE0675c		PFE0675c	PFE0675c		PFE0675c	PFE0675c	PFE0675c	PFE0675c
PFE0680w	PFE0680w		PFE0680w	PFE0680w	PFE0680w	PFE0680w			PFE0680w		PFE0680w	PFE0680w	PFE0680w	PFE0680w	PFE0680w	PFE0680w		PFE0680w	PFE0680w		PFE0680w	PFE0680w	PFE0680w	PFE0680w
PFE0690c	PFE0690c		PFE0690c	PFE0690c	PFE0690c				PFE0690c		PFE0690c	PFE0690c	PFE0690c	PFE0690c	PFE0690c	PFE0690c		PFE0690c	PFE0690c		PFE0690c	PFE0690c	PFE0690c	PFE0690c
PFE0695w	PFE0695w		PFE0695w	PFE0695w	PFE0695w				PFE0695w		PFE0695w	PFE0695w	PFE0695w	PFE0695w	PFE0695w	PFE0695w		PFE0695w	PFE0695w		PFE0695w	PFE0695w	PFE0695w	PFE0695w
PFE0700c	PFE0700c		PFE0700c		PFE0700c	PFE0700c					PFE0700c	PFE0700c	PFE0700c			PFE0700c		PFE0700c	PFE0700c		PFE0700c	PFE0700c		PFE0700c
PFE0705c	PFE0705c		PFE0705c		PFE0705c	PFE0705c					PFE0705c	PFE0705c	PFE0705c		PFE0705c			PFE0705c	PFE0705c		PFE0705c	PFE0705c		PFE0705c
PFE0710w	PFE0710w		PFE0710w		PFE0710w	PFE0710w					PFE0710w	PFE0710w	PFE0710w		PFE0710w			PFE0710w	PFE0710w		PFE0710w	PFE0710w		PFE0710w
PFE0715w	PFE0715w		PFE0715w		PFE0715w				PFE0715w		PFE0715w	PFE0715w		PFE0715w	PFE0715w			PFE0715w	PFE0715w		PFE0715w		PFE0715w	PFE0715w
PFE0725c	PFE0725c		PFE0725c		PFE0725c	PFE0725c					PFE0725c	PFE0725c	PFE0725c		PFE0725c			PFE0725c	PFE0725c		PFE0725c
PFE0730c	PFE0730c		PFE0730c	PFE0730c	PFE0730c	PFE0730c			PFE0730c		PFE0730c	PFE0730c	PFE0730c		PFE0730c	PFE0730c		PFE0730c	PFE0730c		PFE0730c	PFE0730c		PFE0730c
PFE0735w	PFE0735w		PFE0735w	PFE0735w	PFE0735w	PFE0735w			PFE0735w		PFE0735w	PFE0735w	PFE0735w		PFE0735w	PFE0735w		PFE0735w	PFE0735w		PFE0735w	PFE0735w		PFE0735w
PFE0740c	PFE0740c		PFE0740c		PFE0740c				PFE0740c		PFE0740c	PFE0740c	PFE0740c		PFE0740c				PFE0740c			PFE0740c		PFE0740c
PFE0745w	PFE0745w		PFE0745w		PFE0745w				PFE0745w		PFE0745w	PFE0745w	PFE0745w		PFE0745w				PFE0745w			PFE0745w		PFE0745w
PFE0750c	PFE0750c	PFE0750c	PFE0750c		PFE0750c	PFE0750c					PFE0750c	PFE0750c	PFE0750c		PFE0750c	PFE0750c		PFE0750c	PFE0750c		PFE0750c	PFE0750c		PFE0750c
PFE0755c	PFE0755c		PFE0755c	PFE0755c	PFE0755c	PFE0755c	PFE0755c		PFE0755c		PFE0755c	PFE0755c	PFE0755c	PFE0755c	PFE0755c			PFE0755c	PFE0755c		PFE0755c	PFE0755c	PFE0755c	PFE0755c
PFE0760w	PFE0760w		PFE0760w		PFE0760w	PFE0760w					PFE0760w	PFE0760w	PFE0760w	PFE0760w	PFE0760w			PFE0760w	PFE0760w		PFE0760w		PFE0760w	PFE0760w
PFE0765w	PFE0765w		PFE0765w	PFE0765w	PFE0765w	PFE0765w	PFE0765w		PFE0765w		PFE0765w	PFE0765w	PFE0765w	PFE0765w	PFE0765w			PFE0765w	PFE0765w		PFE0765w	PFE0765w	PFE0765w	PFE0765w
PFE0770w	PFE0770w	PFE0770w	PFE0770w	PFE0770w	PFE0770w	PFE0770w			PFE0770w	PFE0770w	PFE0770w	PFE0770w	PFE0770w	PFE0770w	PFE0770w	PFE0770w	PFE0770w	PFE0770w	PFE0770w		PFE0770w	PFE0770w	PFE0770w	PFE0770w
PFE0775c	PFE0775c		PFE0775c	PFE0775c	PFE0775c	PFE0775c		PFE0775c	PFE0775c	PFE0775c	PFE0775c	PFE0775c	PFE0775c	PFE0775c	PFE0775c	PFE0775c	PFE0775c	PFE0775c	PFE0775c	PFE0775c	PFE0775c	PFE0775c	PFE0775c	PFE0775c
PFE0780w	PFE0780w		PFE0780w	PFE0780w	PFE0780w	PFE0780w		PFE0780w	PFE0780w	PFE0780w	PFE0780w	PFE0780w	PFE0780w	PFE0780w	PFE0780w	PFE0780w	PFE0780w	PFE0780w	PFE0780w	PFE0780w	PFE0780w	PFE0780w	PFE0780w	PFE0780w
PFE0785c	PFE0785c		PFE0785c	PFE0785c	PFE0785c	PFE0785c			PFE0785c		PFE0785c	PFE0785c	PFE0785c	PFE0785c	PFE0785c	PFE0785c		PFE0785c	PFE0785c		PFE0785c	PFE0785c	PFE0785c	PFE0785c
PFE0790c	PFE0790c		PFE0790c		PFE0790c	PFE0790c			PFE0790c		PFE0790c	PFE0790c	PFE0790c	PFE0790c	PFE0790c			PFE0790c	PFE0790c		PFE0790c		PFE0790c	PFE0790c
PFE0795c	PFE0795c		PFE0795c	PFE0795c	PFE0795c	PFE0795c	PFE0795c	PFE0795c	PFE0795c	PFE0795c	PFE0795c	PFE0795c	PFE0795c	PFE0795c	PFE0795c	PFE0795c		PFE0795c	PFE0795c		PFE0795c	PFE0795c	PFE0795c	PFE0795c
PFE0800w	PFE0800w		PFE0800w	PFE0800w	PFE0800w	PFE0800w	PFE0800w	PFE0800w	PFE0800w	PFE0800w	PFE0800w	PFE0800w	PFE0800w		PFE0800w	PFE0800w		PFE0800w	PFE0800w		PFE0800w	PFE0800w		PFE0800w
PFE0805w	PFE0805w		PFE0805w		PFE0805w	PFE0805w			PFE0805w		PFE0805w	PFE0805w	PFE0805w		PFE0805w			PFE0805w	PFE0805w		PFE0805w			PFE0805w
PFE0810c	PFE0810c		PFE0810c		PFE0810c	PFE0810c			PFE0810c		PFE0810c	PFE0810c	PFE0810c		PFE0810c	PFE0810c		PFE0810c	PFE0810c		PFE0810c	PFE0810c		PFE0810c
PFE0815w	PFE0815w		PFE0815w		PFE0815w	PFE0815w			PFE0815w	PFE0815w	PFE0815w	PFE0815w	PFE0815w		PFE0815w	PFE0815w		PFE0815w	PFE0815w		PFE0815w	PFE0815w		PFE0815w
PFE0820c	PFE0820c		PFE0820c		PFE0820c				PFE0820c		PFE0820c	PFE0820c	PFE0820c	PFE0820c		PFE0820c		PFE0820c	PFE0820c		PFE0820c	PFE0820c	PFE0820c	PFE0820c
PFE0825w	PFE0825w		PFE0825w		PFE0825w				PFE0825w		PFE0825w	PFE0825w	PFE0825w	PFE0825w		PFE0825w		PFE0825w	PFE0825w		PFE0825w	PFE0825w	PFE0825w	PFE0825w
PFE0830c	PFE0830c		PFE0830c	PFE0830c	PFE0830c				PFE0830c		PFE0830c	PFE0830c	PFE0830c		PFE0830c	PFE0830c		PFE0830c	PFE0830c		PFE0830c	PFE0830c		PFE0830c
PFE0835w	PFE0835w		PFE0835w	PFE0835w	PFE0835w				PFE0835w		PFE0835w	PFE0835w	PFE0835w		PFE0835w	PFE0835w		PFE0835w		PFE0835w	PFE0835w	PFE0835w		PFE0835w
PFE0840c	PFE0840c	PFE0840c	PFE0840c	PFE0840c	PFE0840c	PFE0840c			PFE0840c		PFE0840c	PFE0840c	PFE0840c	PFE0840c	PFE0840c	PFE0840c		PFE0840c	PFE0840c	PFE0840c	PFE0840c	PFE0840c	PFE0840c	PFE0840c
PFE0845c	PFE0845c	PFE0845c	PFE0845c		PFE0845c				PFE0845c		PFE0845c	PFE0845c	PFE0845c		PFE0845c			PFE0845c	PFE0845c		PFE0845c	PFE0845c		PFE0845c
PFE0850c	PFE0850c		PFE0850c	PFE0850c	PFE0850c	PFE0850c			PFE0850c		PFE0850c	PFE0850c	PFE0850c		PFE0850c	PFE0850c		PFE0850c	PFE0850c		PFE0850c	PFE0850c
PFE0855c	PFE0855c		PFE0855c		PFE0855c	PFE0855c				PFE0855c	PFE0855c	PFE0855c	PFE0855c		PFE0855c			PFE0855c	PFE0855c	PFE0855c	PFE0855c	PFE0855c		PFE0855c
PFE0860c	PFE0860c		PFE0860c		PFE0860c	PFE0860c			PFE0860c		PFE0860c	PFE0860c	PFE0860c		PFE0860c	PFE0860c		PFE0860c	PFE0860c	PFE0860c	PFE0860c	PFE0860c		PFE0860c
PFE0865c	PFE0865c		PFE0865c	PFE0865c	PFE0865c				PFE0865c		PFE0865c	PFE0865c	PFE0865c		PFE0865c	PFE0865c		PFE0865c	PFE0865c		PFE0865c	PFE0865c		PFE0865c
PFE0870w	PFE0870w		PFE0870w		PFE0870w	PFE0870w			PFE0870w	PFE0870w	PFE0870w	PFE0870w	PFE0870w		PFE0870w	PFE0870w		PFE0870w	PFE0870w		PFE0870w			PFE0870w
PFE0875c	PFE0875c	PFE0875c	PFE0875c	PFE0875c	PFE0875c	PFE0875c			PFE0875c	PFE0875c	PFE0875c	PFE0875c	PFE0875c	PFE0875c	PFE0875c	PFE0875c	PFE0875c	PFE0875c	PFE0875c	PFE0875c	PFE0875c	PFE0875c	PFE0875c	PFE0875c
PFE0880c	PFE0880c		PFE0880c	PFE0880c	PFE0880c	PFE0880c			PFE0880c	PFE0880c	PFE0880c	PFE0880c	PFE0880c	PFE0880c	PFE0880c		PFE0880c	PFE0880c	PFE0880c		PFE0880c	PFE0880c	PFE0880c	PFE0880c
PFE0885w	PFE0885w		PFE0885w	PFE0885w	PFE0885w	PFE0885w			PFE0885w	PFE0885w	PFE0885w	PFE0885w	PFE0885w		PFE0885w		PFE0885w	PFE0885w	PFE0885w		PFE0885w	PFE0885w		PFE0885w
PFE0890c	PFE0890c		PFE0890c		PFE0890c	PFE0890c			PFE0890c	PFE0890c	PFE0890c	PFE0890c	PFE0890c		PFE0890c	PFE0890c	PFE0890c	PFE0890c			PFE0890c	PFE0890c
PFE0895c	PFE0895c		PFE0895c		PFE0895c	PFE0895c			PFE0895c	PFE0895c	PFE0895c	PFE0895c	PFE0895c					PFE0895c	PFE0895c		PFE0895c	PFE0895c		PFE0895c
PFE0900w	PFE0900w		PFE0900w		PFE0900w	PFE0900w			PFE0900w	PFE0900w	PFE0900w	PFE0900w	PFE0900w					PFE0900w	PFE0900w		PFE0900w	PFE0900w		PFE0900w
PFE0905w	PFE0905w		PFE0905w		PFE0905w	PFE0905w		PFE0905w	PFE0905w		PFE0905w	PFE0905w	PFE0905w	PFE0905w				PFE0905w	PFE0905w	PFE0905w	PFE0905w	PFE0905w	PFE0905w
PFE0910w	PFE0910w		PFE0910w		PFE0910w	PFE0910w			PFE0910w	PFE0910w	PFE0910w	PFE0910w						PFE0910w	PFE0910w		PFE0910w	PFE0910w		PFE0910w
PFE0915c	PFE0915c		PFE0915c		PFE0915c	PFE0915c	PFE0915c			PFE0915c	PFE0915c	PFE0915c		PFE0915c	PFE0915c			PFE0915c	PFE0915c		PFE0915c	PFE0915c	PFE0915c	PFE0915c
PFE0920c	PFE0920c	PFE0920c	PFE0920c		PFE0920c	PFE0920c			PFE0920c		PFE0920c	PFE0920c	PFE0920c	PFE0920c	PFE0920c	PFE0920c		PFE0920c	PFE0920c		PFE0920c	PFE0920c	PFE0920c	PFE0920c
PFE0925c	PFE0925c		PFE0925c	PFE0925c	PFE0925c	PFE0925c			PFE0925c	PFE0925c	PFE0925c	PFE0925c	PFE0925c	PFE0925c	PFE0925c	PFE0925c		PFE0925c	PFE0925c		PFE0925c	PFE0925c	PFE0925c	PFE0925c
PFE0930w	PFE0930w		PFE0930w	PFE0930w	PFE0930w	PFE0930w			PFE0930w	PFE0930w	PFE0930w	PFE0930w	PFE0930w	PFE0930w	PFE0930w	PFE0930w		PFE0930w	PFE0930w		PFE0930w	PFE0930w	PFE0930w	PFE0930w
PFE0935c	PFE0935c		PFE0935c		PFE0935c	PFE0935c			PFE0935c		PFE0935c	PFE0935c	PFE0935c	PFE0935c	PFE0935c			PFE0935c	PFE0935c		PFE0935c	PFE0935c	PFE0935c	PFE0935c
PFE0940c	PFE0940c		PFE0940c	PFE0940c	PFE0940c	PFE0940c			PFE0940c	PFE0940c	PFE0940c	PFE0940c	PFE0940c		PFE0940c	PFE0940c	PFE0940c	PFE0940c			PFE0940c	PFE0940c		PFE0940c
PFE0950c	PFE0950c	PFE0950c	PFE0950c	PFE0950c	PFE0950c	PFE0950c			PFE0950c	PFE0950c	PFE0950c	PFE0950c	PFE0950c	PFE0950c	PFE0950c	PFE0950c	PFE0950c	PFE0950c	PFE0950c	PFE0950c	PFE0950c	PFE0950c	PFE0950c	PFE0950c
PFE0955w	PFE0955w	PFE0955w	PFE0955w	PFE0955w	PFE0955w	PFE0955w			PFE0955w	PFE0955w	PFE0955w	PFE0955w	PFE0955w	PFE0955w	PFE0955w	PFE0955w	PFE0955w	PFE0955w	PFE0955w	PFE0955w	PFE0955w	PFE0955w	PFE0955w	PFE0955w
PFE0960w	PFE0960w		PFE0960w		PFE0960w	PFE0960w			PFE0960w		PFE0960w	PFE0960w	PFE0960w	PFE0960w		PFE0960w		PFE0960w	PFE0960w		PFE0960w	PFE0960w	PFE0960w	PFE0960w
PFE0965c	PFE0965c	PFE0965c	PFE0965c		PFE0965c	PFE0965c			PFE0965c		PFE0965c	PFE0965c	PFE0965c	PFE0965c	PFE0965c			PFE0965c	PFE0965c		PFE0965c	PFE0965c	PFE0965c	PFE0965c
PFE0970w	PFE0970w		PFE0970w		PFE0970w	PFE0970w			PFE0970w		PFE0970w	PFE0970w	PFE0970w	PFE0970w	PFE0970w	PFE0970w		PFE0970w	PFE0970w		PFE0970w	PFE0970w	PFE0970w	PFE0970w
PFE0975c	PFE0975c		PFE0975c	PFE0975c	PFE0975c	PFE0975c			PFE0975c		PFE0975c	PFE0975c	PFE0975c	PFE0975c	PFE0975c	PFE0975c		PFE0975c	PFE0975c		PFE0975c	PFE0975c	PFE0975c	PFE0975c
PFE0980c	PFE0980c		PFE0980c	PFE0980c	PFE0980c	PFE0980c			PFE0980c	PFE0980c	PFE0980c	PFE0980c	PFE0980c	PFE0980c	PFE0980c	PFE0980c		PFE0980c	PFE0980c	PFE0980c	PFE0980c	PFE0980c	PFE0980c	PFE0980c
PFE0985w	PFE0985w		PFE0985w		PFE0985w	PFE0985w			PFE0985w		PFE0985w	PFE0985w	PFE0985w	PFE0985w		PFE0985w		PFE0985w	PFE0985w		PFE0985w	PFE0985w	PFE0985w	PFE0985w
PFE0990w	PFE0990w	PFE0990w	PFE0990w		PFE0990w	PFE0990w			PFE0990w		PFE0990w	PFE0990w			PFE0990w	PFE0990w		PFE0990w	PFE0990w		PFE0990w	PFE0990w		PFE0990w
PFE0995c	PFE0995c	PFE0995c	PFE0995c	PFE0995c	PFE0995c	PFE0995c			PFE0995c		PFE0995c	PFE0995c	PFE0995c		PFE0995c			PFE0995c	PFE0995c	PFE0995c	PFE0995c	PFE0995c		PFE0995c
PFE1000c	PFE1000c		PFE1000c	PFE1000c	PFE1000c	PFE1000c	PFE1000c		PFE1000c		PFE1000c	PFE1000c	PFE1000c	PFE1000c	PFE1000c	PFE1000c		PFE1000c	PFE1000c		PFE1000c	PFE1000c	PFE1000c	PFE1000c
PFE1005w	PFE1005w		PFE1005w	PFE1005w	PFE1005w	PFE1005w	PFE1005w		PFE1005w		PFE1005w	PFE1005w	PFE1005w	PFE1005w	PFE1005w	PFE1005w		PFE1005w	PFE1005w		PFE1005w	PFE1005w	PFE1005w	PFE1005w
PFE1010w	PFE1010w		PFE1010w	PFE1010w	PFE1010w				PFE1010w		PFE1010w	PFE1010w			PFE1010w	PFE1010w		PFE1010w	PFE1010w		PFE1010w	PFE1010w	PFE1010w	PFE1010w
PFE1015c	PFE1015c		PFE1015c		PFE1015c	PFE1015c			PFE1015c		PFE1015c	PFE1015c	PFE1015c		PFE1015c	PFE1015c		PFE1015c	PFE1015c		PFE1015c	PFE1015c		PFE1015c
PFE1020w	PFE1020w		PFE1020w		PFE1020w	PFE1020w			PFE1020w		PFE1020w	PFE1020w	PFE1020w		PFE1020w	PFE1020w		PFE1020w	PFE1020w		PFE1020w			PFE1020w
PFE1025c	PFE1025c		PFE1025c	PFE1025c	PFE1025c				PFE1025c		PFE1025c	PFE1025c	PFE1025c			PFE1025c		PFE1025c	PFE1025c		PFE1025c	PFE1025c		PFE1025c
PFE1030c	PFE1030c	PFE1030c	PFE1030c	PFE1030c	PFE1030c	PFE1030c			PFE1030c	PFE1030c	PFE1030c	PFE1030c			PFE1030c		PFE1030c	PFE1030c	PFE1030c		PFE1030c	PFE1030c		PFE1030c
PFE1035c	PFE1035c		PFE1035c	PFE1035c	PFE1035c	PFE1035c		PFE1035c	PFE1035c		PFE1035c	PFE1035c	PFE1035c			PFE1035c		PFE1035c	PFE1035c		PFE1035c	PFE1035c		PFE1035c
PFE1040c	PFE1040c		PFE1040c		PFE1040c	PFE1040c			PFE1040c		PFE1040c	PFE1040c	PFE1040c		PFE1040c			PFE1040c	PFE1040c		PFE1040c	PFE1040c
PFE1045c	PFE1045c	PFE1045c	PFE1045c		PFE1045c	PFE1045c			PFE1045c		PFE1045c	PFE1045c			PFE1045c	PFE1045c		PFE1045c	PFE1045c		PFE1045c	PFE1045c
PFE1050w	PFE1050w	PFE1050w	PFE1050w		PFE1050w	PFE1050w			PFE1050w		PFE1050w	PFE1050w			PFE1050w	PFE1050w		PFE1050w	PFE1050w		PFE1050w	PFE1050w
PFE1055c	PFE1055c		PFE1055c	PFE1055c	PFE1055c				PFE1055c		PFE1055c	PFE1055c		PFE1055c	PFE1055c			PFE1055c	PFE1055c		PFE1055c	PFE1055c	PFE1055c	PFE1055c
PFE1060c	PFE1060c		PFE1060c		PFE1060c	PFE1060c			PFE1060c		PFE1060c	PFE1060c	PFE1060c	PFE1060c	PFE1060c	PFE1060c		PFE1060c	PFE1060c	PFE1060c	PFE1060c	PFE1060c	PFE1060c	PFE1060c
PFE1065w	PFE1065w		PFE1065w		PFE1065w	PFE1065w			PFE1065w		PFE1065w	PFE1065w	PFE1065w	PFE1065w	PFE1065w	PFE1065w		PFE1065w	PFE1065w	PFE1065w	PFE1065w	PFE1065w	PFE1065w	PFE1065w
PFE1070c	PFE1070c		PFE1070c	PFE1070c	PFE1070c				PFE1070c		PFE1070c	PFE1070c	PFE1070c	PFE1070c	PFE1070c	PFE1070c		PFE1070c	PFE1070c		PFE1070c	PFE1070c	PFE1070c	PFE1070c
PFE1075c	PFE1075c		PFE1075c		PFE1075c				PFE1075c		PFE1075c	PFE1075c						PFE1075c	PFE1075c		PFE1075c	PFE1075c		PFE1075c
PFE1080w	PFE1080w		PFE1080w		PFE1080w				PFE1080w		PFE1080w	PFE1080w						PFE1080w	PFE1080w		PFE1080w	PFE1080w		PFE1080w
PFE1082c	PFE1082c	PFE1082c	PFE1082c	PFE1082c	PFE1082c	PFE1082c			PFE1082c	PFE1082c	PFE1082c	PFE1082c	PFE1082c		PFE1082c	PFE1082c		PFE1082c	PFE1082c	PFE1082c	PFE1082c	PFE1082c		PFE1082c
PFE1085w	PFE1085w	PFE1085w	PFE1085w	PFE1085w	PFE1085w	PFE1085w			PFE1085w	PFE1085w	PFE1085w	PFE1085w	PFE1085w		PFE1085w	PFE1085w		PFE1085w	PFE1085w	PFE1085w	PFE1085w	PFE1085w		PFE1085w
PFE1090w	PFE1090w		PFE1090w	PFE1090w	PFE1090w				PFE1090w		PFE1090w	PFE1090w	PFE1090w		PFE1090w			PFE1090w	PFE1090w	PFE1090w	PFE1090w	PFE1090w		PFE1090w
PFE1095w	PFE1095w				PFE1095w	PFE1095w					PFE1095w	PFE1095w			PFE1095w				PFE1095w
PFE1100w	PFE1100w	PFE1100w	PFE1100w	PFE1100w	PFE1100w				PFE1100w		PFE1100w	PFE1100w	PFE1100w					PFE1100w	PFE1100w		PFE1100w	PFE1100w		PFE1100w
PFE1105c	PFE1105c	PFE1105c	PFE1105c		PFE1105c	PFE1105c			PFE1105c		PFE1105c	PFE1105c	PFE1105c	PFE1105c	PFE1105c	PFE1105c		PFE1105c	PFE1105c		PFE1105c	PFE1105c	PFE1105c	PFE1105c
PFE1110w	PFE1110w	PFE1110w	PFE1110w		PFE1110w	PFE1110w			PFE1110w		PFE1110w	PFE1110w	PFE1110w	PFE1110w	PFE1110w	PFE1110w		PFE1110w	PFE1110w		PFE1110w	PFE1110w	PFE1110w	PFE1110w
PFE1115c	PFE1115c		PFE1115c	PFE1115c	PFE1115c				PFE1115c		PFE1115c	PFE1115c	PFE1115c		PFE1115c	PFE1115c		PFE1115c	PFE1115c		PFE1115c	PFE1115c	PFE1115c	PFE1115c
PFE1120w	PFE1120w		PFE1120w	PFE1120w	PFE1120w				PFE1120w	PFE1120w	PFE1120w	PFE1120w	PFE1120w		PFE1120w	PFE1120w	PFE1120w	PFE1120w	PFE1120w		PFE1120w	PFE1120w	PFE1120w	PFE1120w
PFE1125w	PFE1125w		PFE1125w	PFE1125w	PFE1125w	PFE1125w			PFE1125w		PFE1125w	PFE1125w	PFE1125w	PFE1125w	PFE1125w			PFE1125w	PFE1125w		PFE1125w		PFE1125w	PFE1125w
PFE1130w	PFE1130w		PFE1130w	PFE1130w	PFE1130w	PFE1130w			PFE1130w	PFE1130w	PFE1130w	PFE1130w	PFE1130w		PFE1130w	PFE1130w		PFE1130w	PFE1130w		PFE1130w	PFE1130w		PFE1130w
PFE1135w	PFE1135w		PFE1135w	PFE1135w	PFE1135w	PFE1135w					PFE1135w	PFE1135w	PFE1135w	PFE1135w				PFE1135w	PFE1135w		PFE1135w	PFE1135w	PFE1135w
PFE1140c	PFE1140c		PFE1140c		PFE1140c	PFE1140c			PFE1140c	PFE1140c	PFE1140c	PFE1140c	PFE1140c		PFE1140c		PFE1140c	PFE1140c	PFE1140c		PFE1140c	PFE1140c		PFE1140c
PFE1145w	PFE1145w	PFE1145w	PFE1145w	PFE1145w	PFE1145w	PFE1145w			PFE1145w		PFE1145w	PFE1145w	PFE1145w	PFE1145w	PFE1145w	PFE1145w		PFE1145w	PFE1145w	PFE1145w	PFE1145w	PFE1145w	PFE1145w	PFE1145w
PFE1150w	PFE1150w		PFE1150w		PFE1150w	PFE1150w			PFE1150w		PFE1150w	PFE1150w	PFE1150w	PFE1150w	PFE1150w	PFE1150w		PFE1150w	PFE1150w		PFE1150w	PFE1150w	PFE1150w	PFE1150w
PFE1155c	PFE1155c		PFE1155c		PFE1155c				PFE1155c		PFE1155c	PFE1155c	PFE1155c		PFE1155c			PFE1155c	PFE1155c		PFE1155c	PFE1155c
PFE1160w	PFE1160w		PFE1160w		PFE1160w				PFE1160w		PFE1160w	PFE1160w	PFE1160w		PFE1160w			PFE1160w	PFE1160w		PFE1160w	PFE1160w
PFE1165c	PFE1165c		PFE1165c		PFE1165c	PFE1165c			PFE1165c	PFE1165c	PFE1165c	PFE1165c	PFE1165c	PFE1165c			PFE1165c	PFE1165c	PFE1165c		PFE1165c	PFE1165c	PFE1165c	PFE1165c
PFE1170w	PFE1170w		PFE1170w		PFE1170w	PFE1170w			PFE1170w	PFE1170w	PFE1170w	PFE1170w	PFE1170w		PFE1170w		PFE1170w	PFE1170w	PFE1170w		PFE1170w	PFE1170w	PFE1170w	PFE1170w
PFE1173c	PFE1173c		PFE1173c		PFE1173c	PFE1173c			PFE1173c		PFE1173c	PFE1173c	PFE1173c		PFE1173c	PFE1173c		PFE1173c	PFE1173c		PFE1173c	PFE1173c
PFE1175w	PFE1175w		PFE1175w		PFE1175w	PFE1175w			PFE1175w		PFE1175w	PFE1175w	PFE1175w		PFE1175w	PFE1175w		PFE1175w	PFE1175w		PFE1175w	PFE1175w
PFE1180c	PFE1180c		PFE1180c		PFE1180c	PFE1180c			PFE1180c	PFE1180c	PFE1180c	PFE1180c	PFE1180c	PFE1180c	PFE1180c	PFE1180c		PFE1180c	PFE1180c	PFE1180c	PFE1180c	PFE1180c	PFE1180c	PFE1180c
PFE1185w	PFE1185w		PFE1185w		PFE1185w				PFE1185w		PFE1185w	PFE1185w	PFE1185w		PFE1185w	PFE1185w		PFE1185w	PFE1185w		PFE1185w	PFE1185w		PFE1185w
PFE1190c	PFE1190c	PFE1190c	PFE1190c	PFE1190c	PFE1190c	PFE1190c			PFE1190c	PFE1190c	PFE1190c	PFE1190c	PFE1190c	PFE1190c	PFE1190c			PFE1190c	PFE1190c		PFE1190c	PFE1190c	PFE1190c	PFE1190c
PFE1195w	PFE1195w		PFE1195w		PFE1195w	PFE1195w			PFE1195w	PFE1195w	PFE1195w	PFE1195w	PFE1195w		PFE1195w	PFE1195w		PFE1195w	PFE1195w		PFE1195w			PFE1195w
PFE1200w	PFE1200w		PFE1200w	PFE1200w	PFE1200w	PFE1200w			PFE1200w		PFE1200w	PFE1200w	PFE1200w	PFE1200w	PFE1200w	PFE1200w		PFE1200w	PFE1200w		PFE1200w	PFE1200w	PFE1200w	PFE1200w
PFE1205c	PFE1205c	PFE1205c	PFE1205c	PFE1205c	PFE1205c	PFE1205c			PFE1205c	PFE1205c	PFE1205c	PFE1205c	PFE1205c	PFE1205c	PFE1205c	PFE1205c		PFE1205c	PFE1205c		PFE1205c	PFE1205c	PFE1205c	PFE1205c
PFE1210c	PFE1210c		PFE1210c	PFE1210c	PFE1210c	PFE1210c			PFE1210c		PFE1210c	PFE1210c	PFE1210c		PFE1210c	PFE1210c		PFE1210c	PFE1210c		PFE1210c	PFE1210c		PFE1210c
PFE1215c	PFE1215c		PFE1215c		PFE1215c	PFE1215c			PFE1215c		PFE1215c	PFE1215c	PFE1215c		PFE1215c			PFE1215c	PFE1215c		PFE1215c	PFE1215c		PFE1215c
PFE1220w	PFE1220w		PFE1220w		PFE1220w	PFE1220w			PFE1220w		PFE1220w	PFE1220w	PFE1220w		PFE1220w			PFE1220w	PFE1220w		PFE1220w	PFE1220w		PFE1220w
PFE1225w	PFE1225w		PFE1225w	PFE1225w	PFE1225w				PFE1225w		PFE1225w	PFE1225w	PFE1225w	PFE1225w	PFE1225w			PFE1225w	PFE1225w		PFE1225w	PFE1225w	PFE1225w	PFE1225w
PFE1230c	PFE1230c		PFE1230c		PFE1230c	PFE1230c			PFE1230c		PFE1230c	PFE1230c	PFE1230c		PFE1230c	PFE1230c		PFE1230c	PFE1230c		PFE1230c	PFE1230c		PFE1230c
PFE1235c	PFE1235c		PFE1235c	PFE1235c	PFE1235c	PFE1235c			PFE1235c	PFE1235c	PFE1235c	PFE1235c	PFE1235c	PFE1235c	PFE1235c	PFE1235c	PFE1235c	PFE1235c	PFE1235c		PFE1235c		PFE1235c	PFE1235c
PFE1240w	PFE1240w		PFE1240w	PFE1240w	PFE1240w	PFE1240w			PFE1240w		PFE1240w	PFE1240w	PFE1240w	PFE1240w	PFE1240w	PFE1240w		PFE1240w	PFE1240w		PFE1240w	PFE1240w	PFE1240w	PFE1240w
PFE1245w	PFE1245w		PFE1245w	PFE1245w	PFE1245w	PFE1245w			PFE1245w		PFE1245w	PFE1245w	PFE1245w	PFE1245w	PFE1245w	PFE1245w		PFE1245w	PFE1245w	PFE1245w	PFE1245w	PFE1245w	PFE1245w	PFE1245w
PFE1250w	PFE1250w		PFE1250w	PFE1250w	PFE1250w	PFE1250w			PFE1250w		PFE1250w	PFE1250w	PFE1250w		PFE1250w			PFE1250w	PFE1250w		PFE1250w	PFE1250w		PFE1250w
PFE1255w	PFE1255w		PFE1255w		PFE1255w	PFE1255w			PFE1255w	PFE1255w	PFE1255w	PFE1255w	PFE1255w	PFE1255w	PFE1255w	PFE1255w		PFE1255w	PFE1255w		PFE1255w	PFE1255w	PFE1255w	PFE1255w
PFE1260c	PFE1260c	PFE1260c	PFE1260c	PFE1260c	PFE1260c	PFE1260c			PFE1260c	PFE1260c	PFE1260c	PFE1260c	PFE1260c	PFE1260c	PFE1260c	PFE1260c	PFE1260c	PFE1260c	PFE1260c		PFE1260c	PFE1260c	PFE1260c	PFE1260c
PFE1265w	PFE1265w		PFE1265w	PFE1265w	PFE1265w	PFE1265w			PFE1265w	PFE1265w	PFE1265w	PFE1265w	PFE1265w	PFE1265w	PFE1265w	PFE1265w	PFE1265w	PFE1265w	PFE1265w		PFE1265w	PFE1265w	PFE1265w	PFE1265w
PFE1270c	PFE1270c		PFE1270c	PFE1270c	PFE1270c	PFE1270c			PFE1270c		PFE1270c	PFE1270c	PFE1270c		PFE1270c	PFE1270c		PFE1270c	PFE1270c		PFE1270c	PFE1270c
PFE1275c	PFE1275c		PFE1275c	PFE1275c	PFE1275c	PFE1275c			PFE1275c	PFE1275c	PFE1275c	PFE1275c			PFE1275c			PFE1275c	PFE1275c		PFE1275c			PFE1275c
PFE1280w	PFE1280w		PFE1280w		PFE1280w				PFE1280w	PFE1280w	PFE1280w	PFE1280w			PFE1280w			PFE1280w	PFE1280w		PFE1280w			PFE1280w
PFE1285w	PFE1285w	PFE1285w	PFE1285w	PFE1285w	PFE1285w	PFE1285w			PFE1285w	PFE1285w	PFE1285w	PFE1285w		PFE1285w	PFE1285w	PFE1285w		PFE1285w	PFE1285w		PFE1285w	PFE1285w	PFE1285w	PFE1285w
PFE1290w	PFE1290w		PFE1290w		PFE1290w	PFE1290w			PFE1290w		PFE1290w	PFE1290w	PFE1290w	PFE1290w	PFE1290w	PFE1290w		PFE1290w	PFE1290w		PFE1290w	PFE1290w	PFE1290w	PFE1290w
PFE1295c	PFE1295c		PFE1295c	PFE1295c	PFE1295c	PFE1295c			PFE1295c		PFE1295c	PFE1295c	PFE1295c	PFE1295c	PFE1295c	PFE1295c		PFE1295c	PFE1295c		PFE1295c	PFE1295c	PFE1295c	PFE1295c
PFE1300w	PFE1300w		PFE1300w	PFE1300w	PFE1300w	PFE1300w			PFE1300w		PFE1300w	PFE1300w	PFE1300w	PFE1300w	PFE1300w	PFE1300w		PFE1300w	PFE1300w		PFE1300w	PFE1300w	PFE1300w	PFE1300w
PFE1305c	PFE1305c	PFE1305c	PFE1305c	PFE1305c	PFE1305c	PFE1305c			PFE1305c	PFE1305c	PFE1305c	PFE1305c	PFE1305c	PFE1305c	PFE1305c	PFE1305c	PFE1305c	PFE1305c	PFE1305c		PFE1305c	PFE1305c	PFE1305c	PFE1305c
PFE1310c	PFE1310c		PFE1310c	PFE1310c	PFE1310c	PFE1310c			PFE1310c		PFE1310c	PFE1310c	PFE1310c		PFE1310c	PFE1310c		PFE1310c	PFE1310c		PFE1310c	PFE1310c		PFE1310c
PFE1315w	PFE1315w		PFE1315w	PFE1315w	PFE1315w	PFE1315w			PFE1315w		PFE1315w	PFE1315w	PFE1315w		PFE1315w	PFE1315w		PFE1315w	PFE1315w		PFE1315w	PFE1315w		PFE1315w
PFE1320w	PFE1320w		PFE1320w	PFE1320w	PFE1320w	PFE1320w			PFE1320w		PFE1320w	PFE1320w	PFE1320w		PFE1320w	PFE1320w		PFE1320w	PFE1320w		PFE1320w	PFE1320w		PFE1320w
PFE1325w	PFE1325w	PFE1325w	PFE1325w	PFE1325w	PFE1325w	PFE1325w			PFE1325w	PFE1325w	PFE1325w	PFE1325w	PFE1325w	PFE1325w	PFE1325w	PFE1325w		PFE1325w	PFE1325w	PFE1325w	PFE1325w	PFE1325w	PFE1325w
PFE1330c	PFE1330c		PFE1330c	PFE1330c	PFE1330c	PFE1330c			PFE1330c		PFE1330c	PFE1330c	PFE1330c		PFE1330c	PFE1330c		PFE1330c			PFE1330c	PFE1330c		PFE1330c
PFE1335c	PFE1335c		PFE1335c	PFE1335c	PFE1335c			PFE1335c	PFE1335c		PFE1335c	PFE1335c	PFE1335c		PFE1335c	PFE1335c		PFE1335c	PFE1335c		PFE1335c	PFE1335c		PFE1335c
PFE1340w	PFE1340w		PFE1340w	PFE1340w	PFE1340w			PFE1340w	PFE1340w		PFE1340w	PFE1340w	PFE1340w		PFE1340w	PFE1340w		PFE1340w	PFE1340w		PFE1340w	PFE1340w		PFE1340w
PFE1345c	PFE1345c		PFE1345c	PFE1345c	PFE1345c	PFE1345c			PFE1345c	PFE1345c	PFE1345c	PFE1345c	PFE1345c	PFE1345c	PFE1345c		PFE1345c	PFE1345c	PFE1345c	PFE1345c	PFE1345c	PFE1345c	PFE1345c	PFE1345c
PFE1350c	PFE1350c		PFE1350c	PFE1350c	PFE1350c	PFE1350c			PFE1350c		PFE1350c	PFE1350c	PFE1350c	PFE1350c	PFE1350c			PFE1350c	PFE1350c	PFE1350c	PFE1350c	PFE1350c	PFE1350c	PFE1350c
PFE1355c	PFE1355c		PFE1355c	PFE1355c	PFE1355c		PFE1355c		PFE1355c		PFE1355c	PFE1355c	PFE1355c	PFE1355c	PFE1355c	PFE1355c		PFE1355c	PFE1355c		PFE1355c	PFE1355c	PFE1355c	PFE1355c
PFE1360c	PFE1360c		PFE1360c	PFE1360c	PFE1360c	PFE1360c	PFE1360c		PFE1360c		PFE1360c	PFE1360c	PFE1360c		PFE1360c	PFE1360c		PFE1360c	PFE1360c		PFE1360c	PFE1360c		PFE1360c
PFE1365w	PFE1365w		PFE1365w	PFE1365w	PFE1365w	PFE1365w	PFE1365w		PFE1365w		PFE1365w	PFE1365w	PFE1365w		PFE1365w	PFE1365w		PFE1365w	PFE1365w		PFE1365w	PFE1365w		PFE1365w
PFE1370w	PFE1370w		PFE1370w	PFE1370w	PFE1370w	PFE1370w			PFE1370w	PFE1370w	PFE1370w	PFE1370w	PFE1370w	PFE1370w	PFE1370w	PFE1370w		PFE1370w	PFE1370w		PFE1370w	PFE1370w	PFE1370w	PFE1370w
PFE1375c	PFE1375c		PFE1375c		PFE1375c	PFE1375c	PFE1375c		PFE1375c	PFE1375c	PFE1375c	PFE1375c	PFE1375c	PFE1375c	PFE1375c	PFE1375c		PFE1375c	PFE1375c	PFE1375c	PFE1375c	PFE1375c	PFE1375c	PFE1375c
PFE1390w	PFE1390w		PFE1390w	PFE1390w	PFE1390w	PFE1390w			PFE1390w	PFE1390w	PFE1390w	PFE1390w	PFE1390w		PFE1390w	PFE1390w		PFE1390w	PFE1390w		PFE1390w	PFE1390w		PFE1390w
PFE1395c	PFE1395c		PFE1395c	PFE1395c	PFE1395c	PFE1395c			PFE1395c		PFE1395c	PFE1395c	PFE1395c		PFE1395c			PFE1395c	PFE1395c		PFE1395c			PFE1395c
PFE1400c	PFE1400c		PFE1400c	PFE1400c	PFE1400c				PFE1400c		PFE1400c	PFE1400c	PFE1400c	PFE1400c	PFE1400c			PFE1400c	PFE1400c		PFE1400c	PFE1400c	PFE1400c	PFE1400c
PFE1405c	PFE1405c		PFE1405c	PFE1405c	PFE1405c	PFE1405c	PFE1405c				PFE1405c	PFE1405c	PFE1405c		PFE1405c			PFE1405c	PFE1405c		PFE1405c	PFE1405c		PFE1405c
PFE1410c	PFE1410c		PFE1410c	PFE1410c	PFE1410c	PFE1410c			PFE1410c	PFE1410c	PFE1410c	PFE1410c	PFE1410c	PFE1410c	PFE1410c	PFE1410c		PFE1410c	PFE1410c		PFE1410c	PFE1410c	PFE1410c	PFE1410c
PFE1415w	PFE1415w	PFE1415w	PFE1415w	PFE1415w	PFE1415w	PFE1415w			PFE1415w		PFE1415w	PFE1415w	PFE1415w		PFE1415w	PFE1415w		PFE1415w	PFE1415w		PFE1415w	PFE1415w		PFE1415w
PFE1420w	PFE1420w		PFE1420w	PFE1420w	PFE1420w	PFE1420w			PFE1420w	PFE1420w	PFE1420w	PFE1420w	PFE1420w	PFE1420w	PFE1420w		PFE1420w	PFE1420w	PFE1420w		PFE1420w	PFE1420w	PFE1420w	PFE1420w
PFE1425c	PFE1425c		PFE1425c	PFE1425c	PFE1425c	PFE1425c	PFE1425c	PFE1425c	PFE1425c		PFE1425c	PFE1425c	PFE1425c		PFE1425c	PFE1425c		PFE1425c	PFE1425c		PFE1425c	PFE1425c		PFE1425c
PFE1430c	PFE1430c		PFE1430c		PFE1430c	PFE1430c			PFE1430c		PFE1430c	PFE1430c	PFE1430c	PFE1430c	PFE1430c	PFE1430c		PFE1430c	PFE1430c		PFE1430c	PFE1430c	PFE1430c	PFE1430c
PFE1435c	PFE1435c		PFE1435c	PFE1435c	PFE1435c				PFE1435c		PFE1435c	PFE1435c	PFE1435c	PFE1435c	PFE1435c	PFE1435c		PFE1435c	PFE1435c	PFE1435c	PFE1435c	PFE1435c	PFE1435c
PFE1440c	PFE1440c		PFE1440c	PFE1440c	PFE1440c				PFE1440c		PFE1440c	PFE1440c	PFE1440c	PFE1440c	PFE1440c			PFE1440c	PFE1440c		PFE1440c	PFE1440c	PFE1440c
PFE1445c	PFE1445c		PFE1445c	PFE1445c	PFE1445c	PFE1445c			PFE1445c	PFE1445c	PFE1445c	PFE1445c	PFE1445c		PFE1445c		PFE1445c	PFE1445c	PFE1445c		PFE1445c			PFE1445c
PFE1450c	PFE1450c		PFE1450c	PFE1450c	PFE1450c	PFE1450c			PFE1450c		PFE1450c	PFE1450c	PFE1450c	PFE1450c	PFE1450c	PFE1450c		PFE1450c	PFE1450c		PFE1450c	PFE1450c	PFE1450c	PFE1450c
PFE1455w	PFE1455w		PFE1455w	PFE1455w	PFE1455w	PFE1455w			PFE1455w		PFE1455w	PFE1455w	PFE1455w	PFE1455w	PFE1455w	PFE1455w		PFE1455w	PFE1455w		PFE1455w	PFE1455w	PFE1455w	PFE1455w
PFE1460w	PFE1460w		PFE1460w		PFE1460w	PFE1460w			PFE1460w		PFE1460w	PFE1460w	PFE1460w	PFE1460w	PFE1460w			PFE1460w	PFE1460w		PFE1460w	PFE1460w	PFE1460w	PFE1460w
PFE1465w	PFE1465w		PFE1465w		PFE1465w				PFE1465w	PFE1465w	PFE1465w	PFE1465w	PFE1465w	PFE1465w	PFE1465w		PFE1465w	PFE1465w	PFE1465w		PFE1465w	PFE1465w	PFE1465w	PFE1465w
PFE1470w	PFE1470w		PFE1470w		PFE1470w				PFE1470w		PFE1470w	PFE1470w	PFE1470w	PFE1470w	PFE1470w			PFE1470w	PFE1470w		PFE1470w	PFE1470w	PFE1470w	PFE1470w
PFE1480c	PFE1480c	PFE1480c	PFE1480c	PFE1480c	PFE1480c				PFE1480c		PFE1480c	PFE1480c	PFE1480c	PFE1480c	PFE1480c	PFE1480c		PFE1480c	PFE1480c		PFE1480c	PFE1480c	PFE1480c
PFE1485w	PFE1485w	PFE1485w	PFE1485w	PFE1485w	PFE1485w				PFE1485w		PFE1485w	PFE1485w	PFE1485w	PFE1485w	PFE1485w	PFE1485w		PFE1485w	PFE1485w		PFE1485w	PFE1485w	PFE1485w
PFE1490c	PFE1490c	PFE1490c	PFE1490c		PFE1490c				PFE1490c		PFE1490c	PFE1490c	PFE1490c	PFE1490c	PFE1490c			PFE1490c	PFE1490c		PFE1490c	PFE1490c	PFE1490c	PFE1490c
PFE1500c	PFE1500c	PFE1500c	PFE1500c	PFE1500c	PFE1500c				PFE1500c		PFE1500c	PFE1500c	PFE1500c	PFE1500c	PFE1500c	PFE1500c		PFE1500c	PFE1500c		PFE1500c	PFE1500c	PFE1500c	PFE1500c
PFE1505w	PFE1505w	PFE1505w	PFE1505w	PFE1505w	PFE1505w				PFE1505w		PFE1505w	PFE1505w	PFE1505w	PFE1505w	PFE1505w	PFE1505w		PFE1505w	PFE1505w		PFE1505w	PFE1505w	PFE1505w	PFE1505w
PFE1510c	PFE1510c		PFE1510c	PFE1510c	PFE1510c	PFE1510c			PFE1510c		PFE1510c	PFE1510c	PFE1510c	PFE1510c	PFE1510c			PFE1510c	PFE1510c		PFE1510c	PFE1510c	PFE1510c	PFE1510c
PFE1515w	PFE1515w	PFE1515w	PFE1515w	PFE1515w	PFE1515w	PFE1515w			PFE1515w	PFE1515w	PFE1515w	PFE1515w	PFE1515w	PFE1515w	PFE1515w	PFE1515w		PFE1515w	PFE1515w	PFE1515w	PFE1515w	PFE1515w	PFE1515w	PFE1515w
PFE1520c	PFE1520c		PFE1520c		PFE1520c	PFE1520c	PFE1520c		PFE1520c		PFE1520c	PFE1520c	PFE1520c		PFE1520c			PFE1520c	PFE1520c		PFE1520c	PFE1520c	PFE1520c	PFE1520c
PFE1525w	PFE1525w		PFE1525w		PFE1525w	PFE1525w	PFE1525w		PFE1525w		PFE1525w	PFE1525w	PFE1525w		PFE1525w			PFE1525w	PFE1525w		PFE1525w	PFE1525w	PFE1525w	PFE1525w
PFE1530c	PFE1530c		PFE1530c		PFE1530c						PFE1530c	PFE1530c			PFE1530c	PFE1530c		PFE1530c	PFE1530c		PFE1530c			PFE1530c
PFE1535w	PFE1535w		PFE1535w		PFE1535w						PFE1535w	PFE1535w			PFE1535w	PFE1535w		PFE1535w	PFE1535w		PFE1535w			PFE1535w
PFE1540w	PFE1540w		PFE1540w	PFE1540w	PFE1540w	PFE1540w			PFE1540w	PFE1540w	PFE1540w	PFE1540w	PFE1540w		PFE1540w	PFE1540w		PFE1540w	PFE1540w		PFE1540w	PFE1540w
PFE1545c	PFE1545c		PFE1545c	PFE1545c	PFE1545c	PFE1545c			PFE1545c	PFE1545c	PFE1545c	PFE1545c	PFE1545c		PFE1545c	PFE1545c		PFE1545c	PFE1545c		PFE1545c	PFE1545c		PFE1545c
PFE1550w	PFE1550w		PFE1550w	PFE1550w	PFE1550w	PFE1550w			PFE1550w	PFE1550w	PFE1550w	PFE1550w	PFE1550w		PFE1550w	PFE1550w		PFE1550w	PFE1550w		PFE1550w	PFE1550w		PFE1550w
PFE1555c	PFE1555c		PFE1555c	PFE1555c	PFE1555c	PFE1555c			PFE1555c	PFE1555c	PFE1555c	PFE1555c	PFE1555c	PFE1555c	PFE1555c	PFE1555c		PFE1555c	PFE1555c		PFE1555c	PFE1555c	PFE1555c	PFE1555c
PFE1560c	PFE1560c		PFE1560c		PFE1560c				PFE1560c	PFE1560c	PFE1560c	PFE1560c			PFE1560c	PFE1560c		PFE1560c	PFE1560c		PFE1560c	PFE1560c		PFE1560c
PFE1565w	PFE1565w		PFE1565w	PFE1565w	PFE1565w				PFE1565w	PFE1565w	PFE1565w	PFE1565w			PFE1565w	PFE1565w		PFE1565w	PFE1565w		PFE1565w	PFE1565w		PFE1565w
PFE1570c	PFE1570c	PFE1570c	PFE1570c	PFE1570c	PFE1570c	PFE1570c			PFE1570c	PFE1570c	PFE1570c	PFE1570c	PFE1570c	PFE1570c	PFE1570c			PFE1570c	PFE1570c		PFE1570c	PFE1570c	PFE1570c	PFE1570c
PFE1590w	PFE1590w	PFE1590w	PFE1590w	PFE1590w	PFE1590w	PFE1590w			PFE1590w	PFE1590w	PFE1590w	PFE1590w	PFE1590w	PFE1590w	PFE1590w	PFE1590w		PFE1590w	PFE1590w		PFE1590w	PFE1590w	PFE1590w	PFE1590w
PFE1595c	PFE1595c		PFE1595c		PFE1595c				PFE1595c	PFE1595c	PFE1595c	PFE1595c	PFE1595c	PFE1595c	PFE1595c	PFE1595c		PFE1595c	PFE1595c		PFE1595c	PFE1595c	PFE1595c	PFE1595c
PFE1600w	PFE1600w		PFE1600w		PFE1600w				PFE1600w	PFE1600w	PFE1600w	PFE1600w	PFE1600w		PFE1600w	PFE1600w		PFE1600w	PFE1600w		PFE1600w	PFE1600w		PFE1600w
PFE1605w	PFE1605w		PFE1605w		PFE1605w				PFE1605w		PFE1605w	PFE1605w	PFE1605w		PFE1605w			PFE1605w	PFE1605w		PFE1605w	PFE1605w		PFE1605w
PFE1610w	PFE1610w		PFE1610w	PFE1610w	PFE1610w				PFE1610w		PFE1610w	PFE1610w	PFE1610w	PFE1610w	PFE1610w	PFE1610w		PFE1610w	PFE1610w		PFE1610w	PFE1610w	PFE1610w
PFE1615c	PFE1615c	PFE1615c	PFE1615c	PFE1615c	PFE1615c	PFE1615c			PFE1615c	PFE1615c	PFE1615c	PFE1615c	PFE1615c		PFE1615c	PFE1615c		PFE1615c	PFE1615c	PFE1615c	PFE1615c	PFE1615c		PFE1615c
PFE1620c	PFE1620c		PFE1620c	PFE1620c	PFE1620c	PFE1620c	PFE1620c		PFE1620c	PFE1620c	PFE1620c	PFE1620c	PFE1620c	PFE1620c		PFE1620c	PFE1620c	PFE1620c	PFE1620c	PFE1620c	PFE1620c	PFE1620c	PFE1620c	PFE1620c
PFE1625c	PFE1625c		PFE1625c	PFE1625c	PFE1625c	PFE1625c	PFE1625c		PFE1625c	PFE1625c	PFE1625c	PFE1625c	PFE1625c	PFE1625c		PFE1625c	PFE1625c	PFE1625c	PFE1625c	PFE1625c	PFE1625c	PFE1625c	PFE1625c	PFE1625c
PFE1630w	PFE1630w		PFE1630w	PFE1630w	PFE1630w				PFE1630w	PFE1630w	PFE1630w	PFE1630w	PFE1630w		PFE1630w	PFE1630w	PFE1630w	PFE1630w	PFE1630w	PFE1630w	PFE1630w	PFE1630w		PFE1630w
PFE1635w	PFE1635w		PFE1635w	PFE1635w	PFE1635w	PFE1635w			PFE1635w		PFE1635w	PFE1635w	PFE1635w			PFE1635w		PFE1635w	PFE1635w		PFE1635w	PFE1635w		PFE1635w
PFE1640w	PFE1640w		PFE1640w		PFE1640w				PFE1640w	PFE1640w	PFE1640w	PFE1640w	PFE1640w	PFE1640w	PFE1640w	PFE1640w	PFE1640w	PFE1640w	PFE1640w		PFE1640w	PFE1640w	PFE1640w	PFE1640w
PFF0005c	PFF0005c		PFF0005c	PFF0005c	PFF0005c				PFF0005c		PFF0005c	PFF0005c	PFF0005c		PFF0005c	PFF0005c		PFF0005c	PFF0005c		PFF0005c	PFF0005c		PFF0005c
PFF0010w	PFF0010w		PFF0010w	PFF0010w	PFF0010w				PFF0010w	PFF0010w	PFF0010w	PFF0010w	PFF0010w		PFF0010w		PFF0010w	PFF0010w	PFF0010w		PFF0010w	PFF0010w		PFF0010w
PFF0015c	PFF0015c		PFF0015c	PFF0015c	PFF0015c				PFF0015c		PFF0015c	PFF0015c	PFF0015c		PFF0015c	PFF0015c		PFF0015c	PFF0015c		PFF0015c	PFF0015c
PFF0020c	PFF0020c	PFF0020c	PFF0020c	PFF0020c	PFF0020c	PFF0020c			PFF0020c		PFF0020c	PFF0020c	PFF0020c	PFF0020c	PFF0020c	PFF0020c		PFF0020c	PFF0020c	PFF0020c	PFF0020c	PFF0020c	PFF0020c
PFF0025w	PFF0025w	PFF0025w	PFF0025w	PFF0025w	PFF0025w	PFF0025w			PFF0025w		PFF0025w	PFF0025w	PFF0025w		PFF0025w	PFF0025w		PFF0025w	PFF0025w	PFF0025w	PFF0025w	PFF0025w	PFF0025w
PFF0030c	PFF0030c		PFF0030c		PFF0030c	PFF0030c					PFF0030c	PFF0030c	PFF0030c					PFF0030c	PFF0030c		PFF0030c	PFF0030c		PFF0030c
PFF0035c	PFF0035c		PFF0035c		PFF0035c	PFF0035c			PFF0035c		PFF0035c	PFF0035c	PFF0035c		PFF0035c	PFF0035c		PFF0035c	PFF0035c		PFF0035c	PFF0035c		PFF0035c
PFF0040c	PFF0040c		PFF0040c	PFF0040c	PFF0040c	PFF0040c			PFF0040c	PFF0040c	PFF0040c	PFF0040c	PFF0040c		PFF0040c	PFF0040c		PFF0040c	PFF0040c	PFF0040c	PFF0040c	PFF0040c		PFF0040c
PFF0045c	PFF0045c		PFF0045c	PFF0045c	PFF0045c	PFF0045c			PFF0045c		PFF0045c	PFF0045c	PFF0045c		PFF0045c	PFF0045c		PFF0045c	PFF0045c		PFF0045c	PFF0045c		PFF0045c
PFF0050c	PFF0050c		PFF0050c		PFF0050c				PFF0050c		PFF0050c	PFF0050c	PFF0050c		PFF0050c	PFF0050c		PFF0050c	PFF0050c		PFF0050c	PFF0050c		PFF0050c
PFF0055w	PFF0055w		PFF0055w		PFF0055w				PFF0055w		PFF0055w	PFF0055w	PFF0055w		PFF0055w	PFF0055w		PFF0055w	PFF0055w		PFF0055w	PFF0055w		PFF0055w
PFF0060w	PFF0060w	PFF0060w	PFF0060w		PFF0060w	PFF0060w	PFF0060w		PFF0060w	PFF0060w	PFF0060w	PFF0060w	PFF0060w	PFF0060w	PFF0060w	PFF0060w		PFF0060w	PFF0060w		PFF0060w	PFF0060w	PFF0060w	PFF0060w
PFF0065c	PFF0065c	PFF0065c	PFF0065c		PFF0065c	PFF0065c			PFF0065c		PFF0065c	PFF0065c	PFF0065c	PFF0065c	PFF0065c	PFF0065c		PFF0065c	PFF0065c		PFF0065c	PFF0065c	PFF0065c	PFF0065c
PFF0070w	PFF0070w	PFF0070w	PFF0070w		PFF0070w	PFF0070w			PFF0070w		PFF0070w	PFF0070w	PFF0070w	PFF0070w	PFF0070w	PFF0070w		PFF0070w	PFF0070w		PFF0070w	PFF0070w	PFF0070w	PFF0070w
PFF0075c	PFF0075c		PFF0075c	PFF0075c	PFF0075c	PFF0075c	PFF0075c		PFF0075c	PFF0075c	PFF0075c	PFF0075c	PFF0075c	PFF0075c	PFF0075c	PFF0075c		PFF0075c	PFF0075c		PFF0075c	PFF0075c	PFF0075c	PFF0075c
PFF0080c	PFF0080c		PFF0080c	PFF0080c	PFF0080c	PFF0080c			PFF0080c		PFF0080c	PFF0080c			PFF0080c	PFF0080c		PFF0080c	PFF0080c		PFF0080c	PFF0080c		PFF0080c
PFF0085w	PFF0085w		PFF0085w	PFF0085w	PFF0085w	PFF0085w			PFF0085w		PFF0085w	PFF0085w			PFF0085w	PFF0085w		PFF0085w	PFF0085w		PFF0085w	PFF0085w		PFF0085w
PFF0090w	PFF0090w	PFF0090w	PFF0090w		PFF0090w		PFF0090w		PFF0090w		PFF0090w	PFF0090w	PFF0090w		PFF0090w	PFF0090w		PFF0090w	PFF0090w		PFF0090w	PFF0090w		PFF0090w
PFF0095c	PFF0095c		PFF0095c	PFF0095c	PFF0095c		PFF0095c		PFF0095c		PFF0095c	PFF0095c	PFF0095c	PFF0095c	PFF0095c	PFF0095c		PFF0095c	PFF0095c		PFF0095c	PFF0095c	PFF0095c	PFF0095c
PFF0100w	PFF0100w		PFF0100w	PFF0100w	PFF0100w	PFF0100w			PFF0100w		PFF0100w	PFF0100w	PFF0100w	PFF0100w	PFF0100w	PFF0100w		PFF0100w	PFF0100w		PFF0100w	PFF0100w	PFF0100w	PFF0100w
PFF0105w	PFF0105w		PFF0105w		PFF0105w	PFF0105w			PFF0105w	PFF0105w	PFF0105w	PFF0105w	PFF0105w	PFF0105w	PFF0105w			PFF0105w	PFF0105w		PFF0105w	PFF0105w	PFF0105w	PFF0105w
PFF0110w	PFF0110w		PFF0110w	PFF0110w	PFF0110w	PFF0110w			PFF0110w		PFF0110w	PFF0110w				PFF0110w		PFF0110w	PFF0110w		PFF0110w			PFF0110w
PFF0115c	PFF0115c		PFF0115c	PFF0115c	PFF0115c	PFF0115c					PFF0115c	PFF0115c	PFF0115c		PFF0115c			PFF0115c	PFF0115c		PFF0115c	PFF0115c		PFF0115c
PFF0120w	PFF0120w		PFF0120w	PFF0120w	PFF0120w	PFF0120w					PFF0120w	PFF0120w	PFF0120w		PFF0120w			PFF0120w	PFF0120w		PFF0120w	PFF0120w		PFF0120w
PFF0125c	PFF0125c		PFF0125c	PFF0125c	PFF0125c	PFF0125c			PFF0125c		PFF0125c	PFF0125c	PFF0125c	PFF0125c	PFF0125c	PFF0125c		PFF0125c	PFF0125c	PFF0125c	PFF0125c	PFF0125c	PFF0125c	PFF0125c
PFF0130c	PFF0130c		PFF0130c	PFF0130c	PFF0130c	PFF0130c			PFF0130c		PFF0130c	PFF0130c	PFF0130c		PFF0130c	PFF0130c		PFF0130c	PFF0130c	PFF0130c	PFF0130c			PFF0130c
PFF0135w	PFF0135w		PFF0135w	PFF0135w	PFF0135w	PFF0135w			PFF0135w		PFF0135w	PFF0135w	PFF0135w		PFF0135w	PFF0135w		PFF0135w	PFF0135w	PFF0135w	PFF0135w			PFF0135w
PFF0140c	PFF0140c		PFF0140c	PFF0140c	PFF0140c				PFF0140c		PFF0140c	PFF0140c	PFF0140c		PFF0140c			PFF0140c	PFF0140c		PFF0140c	PFF0140c	PFF0140c	PFF0140c
PFF0145w	PFF0145w		PFF0145w	PFF0145w	PFF0145w	PFF0145w			PFF0145w		PFF0145w	PFF0145w	PFF0145w	PFF0145w	PFF0145w			PFF0145w	PFF0145w		PFF0145w	PFF0145w	PFF0145w	PFF0145w
PFF0150c	PFF0150c		PFF0150c	PFF0150c	PFF0150c	PFF0150c			PFF0150c		PFF0150c	PFF0150c	PFF0150c	PFF0150c	PFF0150c	PFF0150c		PFF0150c	PFF0150c		PFF0150c	PFF0150c	PFF0150c	PFF0150c
PFF0155w	PFF0155w		PFF0155w	PFF0155w	PFF0155w	PFF0155w			PFF0155w		PFF0155w	PFF0155w	PFF0155w	PFF0155w	PFF0155w	PFF0155w		PFF0155w	PFF0155w		PFF0155w	PFF0155w	PFF0155w	PFF0155w
PFF0160c	PFF0160c		PFF0160c	PFF0160c	PFF0160c	PFF0160c			PFF0160c		PFF0160c	PFF0160c	PFF0160c	PFF0160c	PFF0160c	PFF0160c		PFF0160c		PFF0160c	PFF0160c	PFF0160c	PFF0160c	PFF0160c
PFF0165c	PFF0165c		PFF0165c	PFF0165c	PFF0165c	PFF0165c			PFF0165c		PFF0165c	PFF0165c	PFF0165c		PFF0165c	PFF0165c		PFF0165c	PFF0165c		PFF0165c	PFF0165c		PFF0165c
PFF0170w	PFF0170w		PFF0170w	PFF0170w	PFF0170w	PFF0170w			PFF0170w		PFF0170w	PFF0170w	PFF0170w	PFF0170w	PFF0170w	PFF0170w		PFF0170w	PFF0170w		PFF0170w		PFF0170w	PFF0170w
PFF0175c	PFF0175c	PFF0175c	PFF0175c	PFF0175c	PFF0175c	PFF0175c	PFF0175c		PFF0175c	PFF0175c	PFF0175c	PFF0175c	PFF0175c		PFF0175c	PFF0175c		PFF0175c	PFF0175c		PFF0175c	PFF0175c		PFF0175c
PFF0180w	PFF0180w	PFF0180w	PFF0180w	PFF0180w	PFF0180w	PFF0180w	PFF0180w		PFF0180w	PFF0180w	PFF0180w	PFF0180w	PFF0180w		PFF0180w	PFF0180w		PFF0180w	PFF0180w		PFF0180w	PFF0180w		PFF0180w
PFF0185c	PFF0185c	PFF0185c	PFF0185c	PFF0185c	PFF0185c	PFF0185c			PFF0185c	PFF0185c	PFF0185c	PFF0185c	PFF0185c		PFF0185c	PFF0185c		PFF0185c	PFF0185c		PFF0185c	PFF0185c
PFF0190c	PFF0190c		PFF0190c	PFF0190c	PFF0190c	PFF0190c			PFF0190c		PFF0190c	PFF0190c	PFF0190c		PFF0190c	PFF0190c		PFF0190c	PFF0190c		PFF0190c	PFF0190c		PFF0190c
PFF0195c	PFF0195c		PFF0195c		PFF0195c	PFF0195c		PFF0195c	PFF0195c		PFF0195c	PFF0195c	PFF0195c		PFF0195c			PFF0195c	PFF0195c		PFF0195c	PFF0195c		PFF0195c
PFF0200c	PFF0200c	PFF0200c	PFF0200c	PFF0200c	PFF0200c	PFF0200c			PFF0200c	PFF0200c	PFF0200c	PFF0200c			PFF0200c	PFF0200c	PFF0200c	PFF0200c	PFF0200c		PFF0200c	PFF0200c		PFF0200c
PFF0205w	PFF0205w	PFF0205w	PFF0205w	PFF0205w	PFF0205w	PFF0205w			PFF0205w	PFF0205w	PFF0205w	PFF0205w	PFF0205w	PFF0205w	PFF0205w	PFF0205w	PFF0205w	PFF0205w	PFF0205w	PFF0205w	PFF0205w	PFF0205w	PFF0205w	PFF0205w
PFF0210w	PFF0210w		PFF0210w	PFF0210w	PFF0210w	PFF0210w	PFF0210w		PFF0210w	PFF0210w	PFF0210w	PFF0210w	PFF0210w		PFF0210w	PFF0210w	PFF0210w	PFF0210w	PFF0210w		PFF0210w	PFF0210w		PFF0210w
PFF0215w	PFF0215w				PFF0215w						PFF0215w	PFF0215w		PFF0215w				PFF0215w			PFF0215w	PFF0215w	PFF0215w
PFF0220w	PFF0220w		PFF0220w	PFF0220w	PFF0220w	PFF0220w			PFF0220w		PFF0220w	PFF0220w	PFF0220w		PFF0220w	PFF0220w		PFF0220w	PFF0220w		PFF0220w	PFF0220w		PFF0220w
PFF0225w	PFF0225w		PFF0225w		PFF0225w				PFF0225w		PFF0225w	PFF0225w	PFF0225w	PFF0225w		PFF0225w		PFF0225w	PFF0225w		PFF0225w	PFF0225w	PFF0225w	PFF0225w
PFF0230c	PFF0230c		PFF0230c		PFF0230c	PFF0230c					PFF0230c	PFF0230c	PFF0230c	PFF0230c	PFF0230c	PFF0230c		PFF0230c			PFF0230c	PFF0230c	PFF0230c	PFF0230c
PFF0235c	PFF0235c		PFF0235c	PFF0235c	PFF0235c			PFF0235c	PFF0235c		PFF0235c	PFF0235c	PFF0235c	PFF0235c	PFF0235c	PFF0235c		PFF0235c	PFF0235c		PFF0235c	PFF0235c	PFF0235c	PFF0235c
PFF0240c	PFF0240c	PFF0240c	PFF0240c	PFF0240c	PFF0240c	PFF0240c			PFF0240c	PFF0240c	PFF0240c	PFF0240c	PFF0240c		PFF0240c	PFF0240c	PFF0240c	PFF0240c	PFF0240c	PFF0240c	PFF0240c	PFF0240c	PFF0240c	PFF0240c
PFF0245w	PFF0245w	PFF0245w	PFF0245w	PFF0245w	PFF0245w	PFF0245w			PFF0245w	PFF0245w	PFF0245w	PFF0245w	PFF0245w	PFF0245w	PFF0245w	PFF0245w	PFF0245w	PFF0245w	PFF0245w	PFF0245w	PFF0245w	PFF0245w	PFF0245w	PFF0245w
PFF0250w	PFF0250w		PFF0250w	PFF0250w	PFF0250w	PFF0250w	PFF0250w		PFF0250w	PFF0250w	PFF0250w	PFF0250w	PFF0250w	PFF0250w	PFF0250w	PFF0250w		PFF0250w	PFF0250w	PFF0250w	PFF0250w	PFF0250w	PFF0250w
PFF0255c	PFF0255c		PFF0255c		PFF0255c	PFF0255c			PFF0255c		PFF0255c	PFF0255c	PFF0255c	PFF0255c	PFF0255c	PFF0255c		PFF0255c	PFF0255c		PFF0255c	PFF0255c	PFF0255c
PFF0260w	PFF0260w		PFF0260w		PFF0260w	PFF0260w			PFF0260w		PFF0260w	PFF0260w	PFF0260w	PFF0260w	PFF0260w	PFF0260w		PFF0260w	PFF0260w		PFF0260w	PFF0260w	PFF0260w
PFF0265c	PFF0265c										PFF0265c	PFF0265c						PFF0265c	PFF0265c		PFF0265c
PFF0270c	PFF0270c		PFF0270c	PFF0270c	PFF0270c			PFF0270c	PFF0270c		PFF0270c	PFF0270c	PFF0270c	PFF0270c	PFF0270c			PFF0270c	PFF0270c	PFF0270c	PFF0270c	PFF0270c	PFF0270c
PFF0275c	PFF0275c		PFF0275c		PFF0275c	PFF0275c			PFF0275c	PFF0275c	PFF0275c	PFF0275c	PFF0275c	PFF0275c	PFF0275c	PFF0275c		PFF0275c	PFF0275c	PFF0275c	PFF0275c	PFF0275c	PFF0275c	PFF0275c
PFF0280w	PFF0280w		PFF0280w		PFF0280w	PFF0280w			PFF0280w	PFF0280w	PFF0280w	PFF0280w	PFF0280w	PFF0280w	PFF0280w	PFF0280w		PFF0280w	PFF0280w	PFF0280w	PFF0280w	PFF0280w	PFF0280w	PFF0280w
PFF0285c	PFF0285c		PFF0285c	PFF0285c	PFF0285c	PFF0285c			PFF0285c		PFF0285c	PFF0285c	PFF0285c	PFF0285c	PFF0285c	PFF0285c		PFF0285c	PFF0285c		PFF0285c	PFF0285c	PFF0285c	PFF0285c
PFF0290w	PFF0290w	PFF0290w	PFF0290w	PFF0290w	PFF0290w				PFF0290w		PFF0290w	PFF0290w	PFF0290w		PFF0290w	PFF0290w		PFF0290w	PFF0290w		PFF0290w	PFF0290w		PFF0290w
PFF0295c	PFF0295c	PFF0295c	PFF0295c		PFF0295c	PFF0295c	PFF0295c		PFF0295c	PFF0295c	PFF0295c	PFF0295c	PFF0295c		PFF0295c	PFF0295c	PFF0295c	PFF0295c	PFF0295c		PFF0295c	PFF0295c		PFF0295c
PFF0300w	PFF0300w		PFF0300w	PFF0300w	PFF0300w	PFF0300w			PFF0300w	PFF0300w	PFF0300w	PFF0300w	PFF0300w		PFF0300w	PFF0300w	PFF0300w	PFF0300w	PFF0300w	PFF0300w	PFF0300w	PFF0300w		PFF0300w
PFF0305c	PFF0305c	PFF0305c	PFF0305c	PFF0305c	PFF0305c	PFF0305c			PFF0305c	PFF0305c	PFF0305c	PFF0305c	PFF0305c	PFF0305c	PFF0305c	PFF0305c	PFF0305c	PFF0305c	PFF0305c		PFF0305c	PFF0305c	PFF0305c	PFF0305c
PFF0310w	PFF0310w	PFF0310w	PFF0310w		PFF0310w				PFF0310w	PFF0310w	PFF0310w	PFF0310w	PFF0310w	PFF0310w	PFF0310w		PFF0310w	PFF0310w	PFF0310w		PFF0310w	PFF0310w	PFF0310w	PFF0310w
PFF0315c	PFF0315c		PFF0315c		PFF0315c				PFF0315c		PFF0315c	PFF0315c	PFF0315c		PFF0315c	PFF0315c		PFF0315c	PFF0315c		PFF0315c	PFF0315c
PFF0320c	PFF0320c		PFF0320c	PFF0320c	PFF0320c	PFF0320c			PFF0320c		PFF0320c	PFF0320c	PFF0320c	PFF0320c		PFF0320c		PFF0320c	PFF0320c		PFF0320c	PFF0320c	PFF0320c	PFF0320c
PFF0325c	PFF0325c		PFF0325c	PFF0325c	PFF0325c	PFF0325c			PFF0325c		PFF0325c	PFF0325c		PFF0325c	PFF0325c			PFF0325c	PFF0325c		PFF0325c	PFF0325c	PFF0325c	PFF0325c
PFF0330w	PFF0330w		PFF0330w		PFF0330w	PFF0330w			PFF0330w	PFF0330w	PFF0330w	PFF0330w	PFF0330w		PFF0330w	PFF0330w		PFF0330w	PFF0330w	PFF0330w	PFF0330w	PFF0330w		PFF0330w
PFF0335c	PFF0335c		PFF0335c	PFF0335c	PFF0335c	PFF0335c			PFF0335c	PFF0335c	PFF0335c	PFF0335c	PFF0335c	PFF0335c	PFF0335c	PFF0335c		PFF0335c	PFF0335c		PFF0335c	PFF0335c	PFF0335c	PFF0335c
PFF0340c	PFF0340c		PFF0340c		PFF0340c	PFF0340c			PFF0340c		PFF0340c	PFF0340c	PFF0340c	PFF0340c	PFF0340c	PFF0340c		PFF0340c	PFF0340c		PFF0340c	PFF0340c	PFF0340c	PFF0340c
PFF0345w	PFF0345w		PFF0345w	PFF0345w	PFF0345w	PFF0345w			PFF0345w		PFF0345w	PFF0345w	PFF0345w		PFF0345w	PFF0345w		PFF0345w	PFF0345w		PFF0345w	PFF0345w		PFF0345w
PFF0350w	PFF0350w		PFF0350w	PFF0350w	PFF0350w	PFF0350w	PFF0350w		PFF0350w		PFF0350w	PFF0350w	PFF0350w	PFF0350w	PFF0350w	PFF0350w		PFF0350w	PFF0350w	PFF0350w	PFF0350w	PFF0350w	PFF0350w	PFF0350w
PFF0355c	PFF0355c	PFF0355c	PFF0355c	PFF0355c	PFF0355c	PFF0355c			PFF0355c	PFF0355c	PFF0355c	PFF0355c	PFF0355c	PFF0355c	PFF0355c	PFF0355c		PFF0355c	PFF0355c		PFF0355c	PFF0355c	PFF0355c	PFF0355c
PFF0360w	PFF0360w	PFF0360w	PFF0360w	PFF0360w	PFF0360w	PFF0360w			PFF0360w	PFF0360w	PFF0360w	PFF0360w	PFF0360w	PFF0360w	PFF0360w	PFF0360w		PFF0360w	PFF0360w		PFF0360w	PFF0360w	PFF0360w	PFF0360w
PFF0365c	PFF0365c		PFF0365c	PFF0365c	PFF0365c	PFF0365c			PFF0365c		PFF0365c	PFF0365c	PFF0365c		PFF0365c			PFF0365c	PFF0365c		PFF0365c	PFF0365c		PFF0365c
PFF0370w	PFF0370w		PFF0370w	PFF0370w	PFF0370w	PFF0370w			PFF0370w		PFF0370w	PFF0370w	PFF0370w		PFF0370w			PFF0370w	PFF0370w		PFF0370w	PFF0370w		PFF0370w
PFF0375c	PFF0375c	PFF0375c	PFF0375c		PFF0375c	PFF0375c	PFF0375c		PFF0375c	PFF0375c	PFF0375c	PFF0375c	PFF0375c	PFF0375c	PFF0375c			PFF0375c	PFF0375c		PFF0375c	PFF0375c	PFF0375c	PFF0375c
PFF0380w	PFF0380w		PFF0380w	PFF0380w	PFF0380w	PFF0380w			PFF0380w		PFF0380w	PFF0380w	PFF0380w	PFF0380w	PFF0380w	PFF0380w		PFF0380w	PFF0380w		PFF0380w	PFF0380w	PFF0380w	PFF0380w
PFF0385c	PFF0385c		PFF0385c	PFF0385c	PFF0385c				PFF0385c		PFF0385c	PFF0385c			PFF0385c	PFF0385c		PFF0385c	PFF0385c	PFF0385c	PFF0385c	PFF0385c
PFF0390w	PFF0390w		PFF0390w	PFF0390w	PFF0390w				PFF0390w		PFF0390w	PFF0390w			PFF0390w	PFF0390w		PFF0390w	PFF0390w	PFF0390w	PFF0390w	PFF0390w
PFF0395c	PFF0395c		PFF0395c		PFF0395c				PFF0395c		PFF0395c	PFF0395c	PFF0395c		PFF0395c			PFF0395c	PFF0395c		PFF0395c
PFF0400w	PFF0400w		PFF0400w		PFF0400w				PFF0400w		PFF0400w	PFF0400w	PFF0400w		PFF0400w			PFF0400w	PFF0400w		PFF0400w
PFF0405c	PFF0405c		PFF0405c		PFF0405c	PFF0405c			PFF0405c		PFF0405c	PFF0405c	PFF0405c		PFF0405c				PFF0405c			PFF0405c		PFF0405c
PFF0410w	PFF0410w		PFF0410w		PFF0410w	PFF0410w			PFF0410w		PFF0410w	PFF0410w	PFF0410w		PFF0410w				PFF0410w					PFF0410w
PFF0415c	PFF0415c		PFF0415c		PFF0415c				PFF0415c	PFF0415c	PFF0415c	PFF0415c	PFF0415c		PFF0415c	PFF0415c		PFF0415c	PFF0415c		PFF0415c	PFF0415c		PFF0415c
PFF0420c	PFF0420c		PFF0420c		PFF0420c	PFF0420c			PFF0420c		PFF0420c	PFF0420c	PFF0420c	PFF0420c	PFF0420c	PFF0420c		PFF0420c	PFF0420c	PFF0420c	PFF0420c	PFF0420c	PFF0420c	PFF0420c
PFF0425w	PFF0425w		PFF0425w		PFF0425w	PFF0425w			PFF0425w		PFF0425w	PFF0425w	PFF0425w	PFF0425w	PFF0425w	PFF0425w		PFF0425w	PFF0425w	PFF0425w	PFF0425w	PFF0425w	PFF0425w	PFF0425w
PFF0430w	PFF0430w		PFF0430w	PFF0430w	PFF0430w	PFF0430w			PFF0430w	PFF0430w	PFF0430w	PFF0430w	PFF0430w		PFF0430w	PFF0430w		PFF0430w	PFF0430w		PFF0430w	PFF0430w		PFF0430w
PFF0435w	PFF0435w	PFF0435w	PFF0435w	PFF0435w	PFF0435w	PFF0435w	PFF0435w		PFF0435w		PFF0435w	PFF0435w		PFF0435w	PFF0435w	PFF0435w		PFF0435w	PFF0435w	PFF0435w	PFF0435w	PFF0435w	PFF0435w	PFF0435w
PFF0440w	PFF0440w		PFF0440w		PFF0440w	PFF0440w	PFF0440w		PFF0440w	PFF0440w	PFF0440w	PFF0440w	PFF0440w	PFF0440w	PFF0440w	PFF0440w		PFF0440w	PFF0440w		PFF0440w	PFF0440w	PFF0440w	PFF0440w
PFF0445w	PFF0445w		PFF0445w	PFF0445w	PFF0445w	PFF0445w	PFF0445w		PFF0445w		PFF0445w	PFF0445w	PFF0445w	PFF0445w	PFF0445w	PFF0445w		PFF0445w	PFF0445w		PFF0445w	PFF0445w	PFF0445w	PFF0445w
PFF0450c	PFF0450c		PFF0450c	PFF0450c	PFF0450c	PFF0450c				PFF0450c	PFF0450c	PFF0450c	PFF0450c	PFF0450c	PFF0450c	PFF0450c		PFF0450c	PFF0450c		PFF0450c	PFF0450c	PFF0450c	PFF0450c
PFF0455w	PFF0455w		PFF0455w	PFF0455w	PFF0455w	PFF0455w					PFF0455w	PFF0455w	PFF0455w	PFF0455w	PFF0455w	PFF0455w		PFF0455w	PFF0455w		PFF0455w	PFF0455w	PFF0455w	PFF0455w
PFF0460w	PFF0460w		PFF0460w	PFF0460w	PFF0460w	PFF0460w			PFF0460w	PFF0460w	PFF0460w	PFF0460w	PFF0460w	PFF0460w	PFF0460w	PFF0460w		PFF0460w	PFF0460w		PFF0460w	PFF0460w	PFF0460w	PFF0460w
PFF0465c	PFF0465c		PFF0465c	PFF0465c	PFF0465c		PFF0465c		PFF0465c	PFF0465c	PFF0465c	PFF0465c	PFF0465c		PFF0465c	PFF0465c		PFF0465c	PFF0465c		PFF0465c	PFF0465c
PFF0470w	PFF0470w		PFF0470w	PFF0470w	PFF0470w		PFF0470w		PFF0470w	PFF0470w	PFF0470w	PFF0470w	PFF0470w		PFF0470w	PFF0470w		PFF0470w	PFF0470w		PFF0470w	PFF0470w
PFF0475w	PFF0475w				PFF0475w	PFF0475w				PFF0475w	PFF0475w	PFF0475w	PFF0475w		PFF0475w	PFF0475w		PFF0475w	PFF0475w		PFF0475w	PFF0475w		PFF0475w
PFF0480w	PFF0480w	PFF0480w	PFF0480w		PFF0480w	PFF0480w			PFF0480w		PFF0480w	PFF0480w	PFF0480w			PFF0480w		PFF0480w	PFF0480w		PFF0480w	PFF0480w
PFF0485c	PFF0485c		PFF0485c		PFF0485c	PFF0485c			PFF0485c	PFF0485c	PFF0485c	PFF0485c	PFF0485c	PFF0485c	PFF0485c	PFF0485c	PFF0485c	PFF0485c	PFF0485c		PFF0485c	PFF0485c	PFF0485c	PFF0485c
PFF0490w	PFF0490w		PFF0490w	PFF0490w	PFF0490w		PFF0490w		PFF0490w	PFF0490w	PFF0490w	PFF0490w	PFF0490w	PFF0490w	PFF0490w	PFF0490w	PFF0490w	PFF0490w	PFF0490w		PFF0490w	PFF0490w	PFF0490w	PFF0490w
PFF0495w	PFF0495w		PFF0495w	PFF0495w	PFF0495w	PFF0495w			PFF0495w		PFF0495w	PFF0495w	PFF0495w	PFF0495w	PFF0495w			PFF0495w	PFF0495w		PFF0495w	PFF0495w	PFF0495w	PFF0495w
PFF0500c	PFF0500c		PFF0500c	PFF0500c	PFF0500c	PFF0500c			PFF0500c		PFF0500c	PFF0500c	PFF0500c		PFF0500c				PFF0500c			PFF0500c
PFF0505c	PFF0505c		PFF0505c		PFF0505c				PFF0505c		PFF0505c	PFF0505c	PFF0505c	PFF0505c	PFF0505c			PFF0505c	PFF0505c		PFF0505c	PFF0505c	PFF0505c	PFF0505c
PFF0510w	PFF0510w	PFF0510w	PFF0510w	PFF0510w	PFF0510w	PFF0510w			PFF0510w	PFF0510w	PFF0510w	PFF0510w	PFF0510w	PFF0510w	PFF0510w	PFF0510w		PFF0510w	PFF0510w		PFF0510w	PFF0510w	PFF0510w	PFF0510w
PFF0515c	PFF0515c		PFF0515c	PFF0515c	PFF0515c	PFF0515c			PFF0515c		PFF0515c	PFF0515c	PFF0515c	PFF0515c	PFF0515c	PFF0515c		PFF0515c	PFF0515c		PFF0515c		PFF0515c	PFF0515c
PFF0520w	PFF0520w		PFF0520w	PFF0520w	PFF0520w	PFF0520w			PFF0520w		PFF0520w	PFF0520w	PFF0520w	PFF0520w	PFF0520w	PFF0520w		PFF0520w	PFF0520w		PFF0520w	PFF0520w	PFF0520w	PFF0520w
PFF0525w	PFF0525w	PFF0525w	PFF0525w	PFF0525w	PFF0525w	PFF0525w			PFF0525w	PFF0525w	PFF0525w	PFF0525w	PFF0525w		PFF0525w	PFF0525w		PFF0525w	PFF0525w		PFF0525w	PFF0525w		PFF0525w
PFF0530w	PFF0530w	PFF0530w	PFF0530w		PFF0530w	PFF0530w					PFF0530w	PFF0530w	PFF0530w		PFF0530w	PFF0530w			PFF0530w			PFF0530w
PFF0535c	PFF0535c		PFF0535c	PFF0535c	PFF0535c	PFF0535c			PFF0535c		PFF0535c	PFF0535c	PFF0535c	PFF0535c	PFF0535c	PFF0535c		PFF0535c	PFF0535c	PFF0535c	PFF0535c	PFF0535c	PFF0535c	PFF0535c
PFF0540c	PFF0540c		PFF0540c	PFF0540c	PFF0540c				PFF0540c		PFF0540c	PFF0540c	PFF0540c		PFF0540c			PFF0540c	PFF0540c		PFF0540c	PFF0540c
PFF0545c	PFF0545c		PFF0545c	PFF0545c	PFF0545c				PFF0545c		PFF0545c	PFF0545c	PFF0545c	PFF0545c	PFF0545c			PFF0545c			PFF0545c	PFF0545c	PFF0545c
PFF0550w	PFF0550w		PFF0550w	PFF0550w	PFF0550w				PFF0550w		PFF0550w	PFF0550w	PFF0550w	PFF0550w	PFF0550w			PFF0550w	PFF0550w		PFF0550w	PFF0550w	PFF0550w
PFF0555w	PFF0555w		PFF0555w		PFF0555w	PFF0555w			PFF0555w	PFF0555w	PFF0555w	PFF0555w	PFF0555w		PFF0555w	PFF0555w		PFF0555w	PFF0555w		PFF0555w	PFF0555w		PFF0555w
PFF0560c	PFF0560c		PFF0560c		PFF0560c	PFF0560c			PFF0560c		PFF0560c	PFF0560c	PFF0560c		PFF0560c			PFF0560c	PFF0560c		PFF0560c	PFF0560c		PFF0560c
PFF0565c	PFF0565c		PFF0565c		PFF0565c	PFF0565c			PFF0565c	PFF0565c	PFF0565c	PFF0565c	PFF0565c	PFF0565c	PFF0565c			PFF0565c	PFF0565c		PFF0565c	PFF0565c	PFF0565c	PFF0565c
PFF0570c	PFF0570c	PFF0570c	PFF0570c	PFF0570c	PFF0570c				PFF0570c	PFF0570c	PFF0570c	PFF0570c	PFF0570c	PFF0570c	PFF0570c	PFF0570c	PFF0570c	PFF0570c	PFF0570c		PFF0570c	PFF0570c	PFF0570c	PFF0570c
PFF0573c	PFF0573c		PFF0573c	PFF0573c	PFF0573c	PFF0573c			PFF0573c		PFF0573c	PFF0573c	PFF0573c		PFF0573c	PFF0573c		PFF0573c	PFF0573c	PFF0573c	PFF0573c	PFF0573c		PFF0573c
PFF0575c	PFF0575c	PFF0575c	PFF0575c	PFF0575c	PFF0575c	PFF0575c	PFF0575c		PFF0575c	PFF0575c	PFF0575c	PFF0575c	PFF0575c	PFF0575c	PFF0575c	PFF0575c	PFF0575c	PFF0575c	PFF0575c		PFF0575c	PFF0575c	PFF0575c	PFF0575c
PFF0580w	PFF0580w		PFF0580w	PFF0580w	PFF0580w	PFF0580w			PFF0580w	PFF0580w	PFF0580w	PFF0580w	PFF0580w		PFF0580w	PFF0580w	PFF0580w	PFF0580w	PFF0580w	PFF0580w	PFF0580w	PFF0580w		PFF0580w
PFF0585c	PFF0585c		PFF0585c	PFF0585c	PFF0585c				PFF0585c	PFF0585c	PFF0585c	PFF0585c		PFF0585c	PFF0585c	PFF0585c		PFF0585c	PFF0585c		PFF0585c	PFF0585c	PFF0585c	PFF0585c
PFF0590c	PFF0590c		PFF0590c		PFF0590c				PFF0590c	PFF0590c	PFF0590c	PFF0590c	PFF0590c	PFF0590c	PFF0590c	PFF0590c		PFF0590c	PFF0590c		PFF0590c	PFF0590c	PFF0590c	PFF0590c
PFF0595c	PFF0595c		PFF0595c	PFF0595c	PFF0595c	PFF0595c	PFF0595c		PFF0595c	PFF0595c	PFF0595c	PFF0595c	PFF0595c	PFF0595c	PFF0595c	PFF0595c	PFF0595c	PFF0595c	PFF0595c		PFF0595c	PFF0595c	PFF0595c	PFF0595c
PFF0600w	PFF0600w		PFF0600w	PFF0600w	PFF0600w	PFF0600w	PFF0600w		PFF0600w	PFF0600w	PFF0600w	PFF0600w	PFF0600w	PFF0600w	PFF0600w	PFF0600w	PFF0600w	PFF0600w	PFF0600w		PFF0600w	PFF0600w	PFF0600w	PFF0600w
DUP1-PFF0600w{pep}
PFF0605c	PFF0605c		PFF0605c		PFF0605c				PFF0605c		PFF0605c	PFF0605c	PFF0605c	PFF0605c	PFF0605c	PFF0605c		PFF0605c	PFF0605c		PFF0605c	PFF0605c	PFF0605c	PFF0605c
PFF0610c	PFF0610c		PFF0610c		PFF0610c	PFF0610c			PFF0610c		PFF0610c	PFF0610c	PFF0610c		PFF0610c			PFF0610c	PFF0610c		PFF0610c	PFF0610c
PFF0615c	PFF0615c		PFF0615c	PFF0615c	PFF0615c				PFF0615c		PFF0615c	PFF0615c		PFF0615c	PFF0615c	PFF0615c		PFF0615c	PFF0615c		PFF0615c	PFF0615c	PFF0615c	PFF0615c
PFF0620c	PFF0620c	PFF0620c	PFF0620c	PFF0620c	PFF0620c	PFF0620c			PFF0620c		PFF0620c	PFF0620c	PFF0620c	PFF0620c	PFF0620c	PFF0620c		PFF0620c	PFF0620c		PFF0620c	PFF0620c	PFF0620c	PFF0620c
PFF0625w	PFF0625w	PFF0625w	PFF0625w	PFF0625w	PFF0625w	PFF0625w			PFF0625w		PFF0625w	PFF0625w	PFF0625w	PFF0625w	PFF0625w	PFF0625w		PFF0625w	PFF0625w		PFF0625w	PFF0625w	PFF0625w	PFF0625w
PFF0630c	PFF0630c	PFF0630c	PFF0630c	PFF0630c	PFF0630c	PFF0630c			PFF0630c		PFF0630c	PFF0630c	PFF0630c		PFF0630c	PFF0630c		PFF0630c	PFF0630c	PFF0630c	PFF0630c	PFF0630c		PFF0630c
PFF0635w	PFF0635w	PFF0635w	PFF0635w	PFF0635w	PFF0635w	PFF0635w			PFF0635w		PFF0635w	PFF0635w	PFF0635w		PFF0635w	PFF0635w		PFF0635w	PFF0635w	PFF0635w	PFF0635w	PFF0635w		PFF0635w
PFF0640w	PFF0640w	PFF0640w	PFF0640w		PFF0640w	PFF0640w			PFF0640w		PFF0640w	PFF0640w		PFF0640w	PFF0640w	PFF0640w		PFF0640w	PFF0640w		PFF0640w	PFF0640w	PFF0640w	PFF0640w
PFF0645c	PFF0645c		PFF0645c	PFF0645c	PFF0645c	PFF0645c			PFF0645c	PFF0645c	PFF0645c	PFF0645c	PFF0645c	PFF0645c	PFF0645c	PFF0645c		PFF0645c	PFF0645c		PFF0645c	PFF0645c	PFF0645c	PFF0645c
PFF0650w	PFF0650w		PFF0650w	PFF0650w	PFF0650w	PFF0650w			PFF0650w	PFF0650w	PFF0650w	PFF0650w	PFF0650w	PFF0650w	PFF0650w	PFF0650w		PFF0650w	PFF0650w		PFF0650w	PFF0650w	PFF0650w	PFF0650w
PFF0655c	PFF0655c		PFF0655c	PFF0655c	PFF0655c	PFF0655c			PFF0655c		PFF0655c	PFF0655c	PFF0655c	PFF0655c	PFF0655c	PFF0655c		PFF0655c	PFF0655c		PFF0655c	PFF0655c	PFF0655c	PFF0655c
PFF0660w	PFF0660w		PFF0660w	PFF0660w	PFF0660w	PFF0660w			PFF0660w		PFF0660w	PFF0660w	PFF0660w	PFF0660w	PFF0660w	PFF0660w		PFF0660w	PFF0660w		PFF0660w	PFF0660w	PFF0660w	PFF0660w
PFF0665c	PFF0665c		PFF0665c	PFF0665c	PFF0665c	PFF0665c			PFF0665c	PFF0665c	PFF0665c	PFF0665c	PFF0665c		PFF0665c	PFF0665c		PFF0665c	PFF0665c		PFF0665c	PFF0665c		PFF0665c
PFF0670w	PFF0670w	PFF0670w	PFF0670w	PFF0670w	PFF0670w	PFF0670w			PFF0670w	PFF0670w	PFF0670w	PFF0670w	PFF0670w	PFF0670w	PFF0670w	PFF0670w		PFF0670w	PFF0670w		PFF0670w	PFF0670w	PFF0670w
PFF0675c	PFF0675c	PFF0675c	PFF0675c	PFF0675c	PFF0675c				PFF0675c	PFF0675c	PFF0675c	PFF0675c		PFF0675c	PFF0675c			PFF0675c	PFF0675c	PFF0675c	PFF0675c	PFF0675c	PFF0675c	PFF0675c
PFF0680c	PFF0680c	PFF0680c	PFF0680c	PFF0680c	PFF0680c	PFF0680c	PFF0680c		PFF0680c		PFF0680c	PFF0680c		PFF0680c	PFF0680c			PFF0680c	PFF0680c	PFF0680c	PFF0680c	PFF0680c	PFF0680c	PFF0680c
PFF0683c	PFF0683c		PFF0683c	PFF0683c	PFF0683c	PFF0683c			PFF0683c		PFF0683c	PFF0683c		PFF0683c	PFF0683c	PFF0683c		PFF0683c	PFF0683c		PFF0683c	PFF0683c	PFF0683c	PFF0683c
PFF0685c	PFF0685c	PFF0685c	PFF0685c	PFF0685c	PFF0685c	PFF0685c			PFF0685c		PFF0685c	PFF0685c	PFF0685c	PFF0685c	PFF0685c	PFF0685c		PFF0685c	PFF0685c		PFF0685c	PFF0685c	PFF0685c	PFF0685c
PFF0690c	PFF0690c		PFF0690c	PFF0690c	PFF0690c	PFF0690c			PFF0690c		PFF0690c	PFF0690c		PFF0690c	PFF0690c	PFF0690c		PFF0690c	PFF0690c	PFF0690c	PFF0690c	PFF0690c	PFF0690c	PFF0690c
PFF0695w	PFF0695w		PFF0695w		PFF0695w	PFF0695w			PFF0695w		PFF0695w	PFF0695w	PFF0695w		PFF0695w	PFF0695w		PFF0695w	PFF0695w	PFF0695w	PFF0695w	PFF0695w		PFF0695w
PFF0700c	PFF0700c		PFF0700c		PFF0700c	PFF0700c	PFF0700c		PFF0700c	PFF0700c	PFF0700c	PFF0700c	PFF0700c		PFF0700c	PFF0700c		PFF0700c	PFF0700c		PFF0700c	PFF0700c
PFF0705c	PFF0705c		PFF0705c	PFF0705c	PFF0705c	PFF0705c			PFF0705c	PFF0705c	PFF0705c	PFF0705c	PFF0705c	PFF0705c	PFF0705c		PFF0705c	PFF0705c	PFF0705c		PFF0705c	PFF0705c	PFF0705c	PFF0705c
PFF0710w	PFF0710w		PFF0710w	PFF0710w	PFF0710w	PFF0710w			PFF0710w	PFF0710w	PFF0710w	PFF0710w	PFF0710w	PFF0710w	PFF0710w		PFF0710w	PFF0710w	PFF0710w		PFF0710w	PFF0710w	PFF0710w	PFF0710w
PFF0715c	PFF0715c		PFF0715c	PFF0715c	PFF0715c	PFF0715c			PFF0715c		PFF0715c	PFF0715c	PFF0715c		PFF0715c			PFF0715c	PFF0715c	PFF0715c	PFF0715c	PFF0715c
PFF0720w	PFF0720w		PFF0720w	PFF0720w	PFF0720w	PFF0720w			PFF0720w		PFF0720w	PFF0720w	PFF0720w		PFF0720w			PFF0720w	PFF0720w	PFF0720w	PFF0720w	PFF0720w
PFF0725w	PFF0725w		PFF0725w		PFF0725w				PFF0725w		PFF0725w	PFF0725w	PFF0725w		PFF0725w			PFF0725w	PFF0725w		PFF0725w	PFF0725w
PFF0730c	PFF0730c		PFF0730c	PFF0730c	PFF0730c	PFF0730c			PFF0730c	PFF0730c	PFF0730c	PFF0730c	PFF0730c		PFF0730c			PFF0730c	PFF0730c		PFF0730c	PFF0730c		PFF0730c
PFF0735w	PFF0735w		PFF0735w	PFF0735w	PFF0735w	PFF0735w			PFF0735w	PFF0735w	PFF0735w	PFF0735w	PFF0735w		PFF0735w			PFF0735w	PFF0735w		PFF0735w	PFF0735w		PFF0735w
PFF0740c	PFF0740c		PFF0740c		PFF0740c	PFF0740c					PFF0740c	PFF0740c	PFF0740c	PFF0740c	PFF0740c			PFF0740c	PFF0740c	PFF0740c	PFF0740c		PFF0740c
PFF0745c	PFF0745c		PFF0745c	PFF0745c	PFF0745c	PFF0745c			PFF0745c	PFF0745c	PFF0745c	PFF0745c	PFF0745c		PFF0745c	PFF0745c		PFF0745c	PFF0745c		PFF0745c	PFF0745c		PFF0745c
PFF0750w	PFF0750w		PFF0750w	PFF0750w	PFF0750w	PFF0750w			PFF0750w		PFF0750w	PFF0750w	PFF0750w	PFF0750w	PFF0750w	PFF0750w		PFF0750w	PFF0750w		PFF0750w	PFF0750w	PFF0750w	PFF0750w
PFF0755c	PFF0755c		PFF0755c		PFF0755c	PFF0755c			PFF0755c		PFF0755c	PFF0755c	PFF0755c		PFF0755c	PFF0755c		PFF0755c	PFF0755c		PFF0755c	PFF0755c		PFF0755c
PFF0760w	PFF0760w		PFF0760w		PFF0760w	PFF0760w			PFF0760w		PFF0760w	PFF0760w	PFF0760w		PFF0760w	PFF0760w		PFF0760w	PFF0760w		PFF0760w	PFF0760w		PFF0760w
PFF0765c	PFF0765c		PFF0765c		PFF0765c	PFF0765c			PFF0765c		PFF0765c	PFF0765c	PFF0765c	PFF0765c	PFF0765c			PFF0765c	PFF0765c	PFF0765c	PFF0765c	PFF0765c	PFF0765c
PFF0770c	PFF0770c	PFF0770c	PFF0770c	PFF0770c	PFF0770c	PFF0770c			PFF0770c	PFF0770c	PFF0770c	PFF0770c	PFF0770c	PFF0770c	PFF0770c	PFF0770c	PFF0770c	PFF0770c	PFF0770c	PFF0770c	PFF0770c	PFF0770c	PFF0770c	PFF0770c
PFF0775w	PFF0775w	PFF0775w	PFF0775w	PFF0775w	PFF0775w	PFF0775w			PFF0775w	PFF0775w	PFF0775w	PFF0775w	PFF0775w	PFF0775w	PFF0775w	PFF0775w	PFF0775w	PFF0775w	PFF0775w	PFF0775w	PFF0775w	PFF0775w	PFF0775w	PFF0775w
PFF0780w	PFF0780w		PFF0780w	PFF0780w	PFF0780w	PFF0780w			PFF0780w		PFF0780w	PFF0780w	PFF0780w					PFF0780w	PFF0780w		PFF0780w
PFF0785w	PFF0785w		PFF0785w		PFF0785w	PFF0785w			PFF0785w	PFF0785w	PFF0785w	PFF0785w	PFF0785w	PFF0785w	PFF0785w			PFF0785w	PFF0785w		PFF0785w	PFF0785w	PFF0785w	PFF0785w
PFF0790c	PFF0790c		PFF0790c		PFF0790c				PFF0790c		PFF0790c	PFF0790c	PFF0790c		PFF0790c	PFF0790c		PFF0790c	PFF0790c		PFF0790c	PFF0790c		PFF0790c
PFF0795w	PFF0795w		PFF0795w		PFF0795w				PFF0795w	PFF0795w	PFF0795w	PFF0795w	PFF0795w		PFF0795w	PFF0795w	PFF0795w	PFF0795w	PFF0795w		PFF0795w	PFF0795w		PFF0795w
PFF0800w	PFF0800w	PFF0800w	PFF0800w	PFF0800w	PFF0800w	PFF0800w		PFF0800w	PFF0800w		PFF0800w	PFF0800w	PFF0800w	PFF0800w	PFF0800w	PFF0800w		PFF0800w	PFF0800w		PFF0800w	PFF0800w	PFF0800w	PFF0800w
PFF0805c	PFF0805c		PFF0805c	PFF0805c	PFF0805c	PFF0805c	PFF0805c		PFF0805c		PFF0805c	PFF0805c		PFF0805c	PFF0805c			PFF0805c	PFF0805c		PFF0805c	PFF0805c	PFF0805c	PFF0805c
PFF0810c	PFF0810c	PFF0810c	PFF0810c	PFF0810c	PFF0810c	PFF0810c			PFF0810c		PFF0810c	PFF0810c	PFF0810c	PFF0810c	PFF0810c	PFF0810c		PFF0810c	PFF0810c		PFF0810c	PFF0810c	PFF0810c	PFF0810c
PFF0815w	PFF0815w	PFF0815w	PFF0815w	PFF0815w	PFF0815w	PFF0815w			PFF0815w		PFF0815w	PFF0815w	PFF0815w		PFF0815w	PFF0815w		PFF0815w	PFF0815w		PFF0815w	PFF0815w		PFF0815w
PFF0820w	PFF0820w		PFF0820w	PFF0820w	PFF0820w	PFF0820w			PFF0820w		PFF0820w	PFF0820w	PFF0820w	PFF0820w	PFF0820w			PFF0820w	PFF0820w	PFF0820w	PFF0820w	PFF0820w	PFF0820w
PFF0825c	PFF0825c		PFF0825c	PFF0825c	PFF0825c	PFF0825c	PFF0825c		PFF0825c		PFF0825c	PFF0825c	PFF0825c	PFF0825c	PFF0825c	PFF0825c		PFF0825c	PFF0825c		PFF0825c	PFF0825c	PFF0825c	PFF0825c
PFF0830w	PFF0830w	PFF0830w	PFF0830w	PFF0830w	PFF0830w	PFF0830w			PFF0830w		PFF0830w	PFF0830w	PFF0830w		PFF0830w	PFF0830w		PFF0830w	PFF0830w		PFF0830w	PFF0830w		PFF0830w
PFF0835w	PFF0835w	PFF0835w	PFF0835w	PFF0835w	PFF0835w	PFF0835w			PFF0835w	PFF0835w	PFF0835w	PFF0835w	PFF0835w	PFF0835w	PFF0835w	PFF0835w		PFF0835w	PFF0835w		PFF0835w	PFF0835w	PFF0835w	PFF0835w
PFF0840w	PFF0840w		PFF0840w		PFF0840w				PFF0840w	PFF0840w	PFF0840w	PFF0840w	PFF0840w	PFF0840w	PFF0840w		PFF0840w	PFF0840w	PFF0840w		PFF0840w	PFF0840w	PFF0840w	PFF0840w
PFF0845c	PFF0845c		PFF0845c	PFF0845c	PFF0845c	PFF0845c			PFF0845c	PFF0845c	PFF0845c	PFF0845c	PFF0845c		PFF0845c	PFF0845c		PFF0845c	PFF0845c	PFF0845c	PFF0845c	PFF0845c		PFF0845c
PFF0847w	PFF0847w	PFF0847w	PFF0847w	PFF0847w	PFF0847w	PFF0847w			PFF0847w	PFF0847w	PFF0847w	PFF0847w	PFF0847w	PFF0847w	PFF0847w	PFF0847w		PFF0847w	PFF0847w		PFF0847w	PFF0847w	PFF0847w	PFF0847w
PFF0850c	PFF0850c	PFF0850c	PFF0850c	PFF0850c	PFF0850c	PFF0850c			PFF0850c	PFF0850c	PFF0850c	PFF0850c	PFF0850c		PFF0850c	PFF0850c		PFF0850c	PFF0850c		PFF0850c	PFF0850c		PFF0850c
PFF0855c	PFF0855c		PFF0855c	PFF0855c	PFF0855c	PFF0855c			PFF0855c	PFF0855c	PFF0855c	PFF0855c	PFF0855c		PFF0855c	PFF0855c		PFF0855c	PFF0855c		PFF0855c	PFF0855c		PFF0855c
PFF0860c	PFF0860c		PFF0860c	PFF0860c	PFF0860c	PFF0860c			PFF0860c	PFF0860c	PFF0860c	PFF0860c	PFF0860c	PFF0860c	PFF0860c	PFF0860c	PFF0860c	PFF0860c	PFF0860c		PFF0860c	PFF0860c	PFF0860c	PFF0860c
PFF0865w	PFF0865w	PFF0865w	PFF0865w	PFF0865w	PFF0865w	PFF0865w			PFF0865w	PFF0865w	PFF0865w	PFF0865w	PFF0865w	PFF0865w	PFF0865w			PFF0865w	PFF0865w		PFF0865w	PFF0865w	PFF0865w	PFF0865w
PFF0870w	PFF0870w	PFF0870w	PFF0870w	PFF0870w	PFF0870w	PFF0870w		PFF0870w	PFF0870w	PFF0870w	PFF0870w	PFF0870w	PFF0870w	PFF0870w	PFF0870w	PFF0870w	PFF0870w	PFF0870w	PFF0870w		PFF0870w	PFF0870w	PFF0870w	PFF0870w
PFF0875w	PFF0875w		PFF0875w	PFF0875w	PFF0875w				PFF0875w	PFF0875w	PFF0875w	PFF0875w	PFF0875w		PFF0875w			PFF0875w	PFF0875w		PFF0875w	PFF0875w
PFF0880c	PFF0880c		PFF0880c	PFF0880c	PFF0880c				PFF0880c		PFF0880c	PFF0880c	PFF0880c	PFF0880c	PFF0880c			PFF0880c	PFF0880c		PFF0880c	PFF0880c	PFF0880c	PFF0880c
PFF0885w	PFF0885w		PFF0885w		PFF0885w	PFF0885w			PFF0885w		PFF0885w	PFF0885w	PFF0885w		PFF0885w			PFF0885w	PFF0885w		PFF0885w	PFF0885w		PFF0885w
PFF0890c	PFF0890c		PFF0890c	PFF0890c	PFF0890c	PFF0890c			PFF0890c		PFF0890c	PFF0890c	PFF0890c	PFF0890c	PFF0890c	PFF0890c		PFF0890c	PFF0890c		PFF0890c	PFF0890c	PFF0890c	PFF0890c
PFF0895w	PFF0895w		PFF0895w	PFF0895w	PFF0895w	PFF0895w			PFF0895w		PFF0895w	PFF0895w	PFF0895w	PFF0895w	PFF0895w	PFF0895w		PFF0895w	PFF0895w		PFF0895w	PFF0895w	PFF0895w	PFF0895w
PFF0900c	PFF0900c		PFF0900c	PFF0900c	PFF0900c	PFF0900c			PFF0900c	PFF0900c	PFF0900c	PFF0900c	PFF0900c		PFF0900c			PFF0900c	PFF0900c		PFF0900c	PFF0900c		PFF0900c
PFF0905w	PFF0905w		PFF0905w	PFF0905w	PFF0905w	PFF0905w			PFF0905w	PFF0905w	PFF0905w	PFF0905w	PFF0905w		PFF0905w			PFF0905w	PFF0905w		PFF0905w	PFF0905w		PFF0905w
PFF0910c	PFF0910c		PFF0910c		PFF0910c	PFF0910c			PFF0910c		PFF0910c	PFF0910c	PFF0910c	PFF0910c		PFF0910c		PFF0910c	PFF0910c		PFF0910c	PFF0910c	PFF0910c	PFF0910c
PFF0915w	PFF0915w		PFF0915w		PFF0915w	PFF0915w			PFF0915w		PFF0915w	PFF0915w	PFF0915w	PFF0915w		PFF0915w		PFF0915w	PFF0915w		PFF0915w	PFF0915w	PFF0915w	PFF0915w
PFF0920c	PFF0920c		PFF0920c	PFF0920c	PFF0920c	PFF0920c					PFF0920c	PFF0920c	PFF0920c		PFF0920c	PFF0920c		PFF0920c	PFF0920c		PFF0920c	PFF0920c		PFF0920c
PFF0925w	PFF0925w		PFF0925w	PFF0925w	PFF0925w	PFF0925w					PFF0925w	PFF0925w	PFF0925w		PFF0925w	PFF0925w		PFF0925w	PFF0925w		PFF0925w	PFF0925w		PFF0925w
PFF0930w	PFF0930w		PFF0930w	PFF0930w	PFF0930w	PFF0930w			PFF0930w		PFF0930w	PFF0930w			PFF0930w	PFF0930w			PFF0930w			PFF0930w
PFF0935c	PFF0935c		PFF0935c		PFF0935c	PFF0935c			PFF0935c		PFF0935c	PFF0935c	PFF0935c		PFF0935c			PFF0935c	PFF0935c		PFF0935c	PFF0935c
PFF0940c	PFF0940c		PFF0940c		PFF0940c				PFF0940c	PFF0940c	PFF0940c	PFF0940c	PFF0940c		PFF0940c			PFF0940c	PFF0940c		PFF0940c	PFF0940c		PFF0940c
PFF0945c	PFF0945c		PFF0945c	PFF0945c	PFF0945c				PFF0945c	PFF0945c	PFF0945c	PFF0945c			PFF0945c	PFF0945c	PFF0945c	PFF0945c	PFF0945c		PFF0945c	PFF0945c		PFF0945c
PFF0950w	PFF0950w		PFF0950w	PFF0950w	PFF0950w				PFF0950w	PFF0950w	PFF0950w	PFF0950w			PFF0950w	PFF0950w	PFF0950w	PFF0950w	PFF0950w		PFF0950w	PFF0950w		PFF0950w
PFF0960c	PFF0960c		PFF0960c		PFF0960c	PFF0960c			PFF0960c		PFF0960c	PFF0960c	PFF0960c	PFF0960c	PFF0960c			PFF0960c	PFF0960c		PFF0960c	PFF0960c	PFF0960c
PFF0965c	PFF0965c		PFF0965c		PFF0965c	PFF0965c			PFF0965c		PFF0965c	PFF0965c	PFF0965c	PFF0965c	PFF0965c			PFF0965c	PFF0965c		PFF0965c	PFF0965c	PFF0965c	PFF0965c
PFF0970w	PFF0970w		PFF0970w		PFF0970w	PFF0970w			PFF0970w		PFF0970w	PFF0970w	PFF0970w	PFF0970w	PFF0970w			PFF0970w	PFF0970w		PFF0970w	PFF0970w	PFF0970w	PFF0970w
PFF0975c	PFF0975c		PFF0975c	PFF0975c	PFF0975c	PFF0975c			PFF0975c	PFF0975c	PFF0975c	PFF0975c	PFF0975c		PFF0975c	PFF0975c		PFF0975c	PFF0975c	PFF0975c	PFF0975c	PFF0975c		PFF0975c
PFF0980w	PFF0980w		PFF0980w	PFF0980w	PFF0980w	PFF0980w			PFF0980w	PFF0980w	PFF0980w	PFF0980w	PFF0980w	PFF0980w	PFF0980w	PFF0980w		PFF0980w	PFF0980w	PFF0980w	PFF0980w	PFF0980w	PFF0980w	PFF0980w
PFF0985c	PFF0985c	PFF0985c	PFF0985c	PFF0985c	PFF0985c	PFF0985c			PFF0985c	PFF0985c	PFF0985c	PFF0985c	PFF0985c	PFF0985c	PFF0985c		PFF0985c	PFF0985c	PFF0985c		PFF0985c	PFF0985c	PFF0985c	PFF0985c
PFF0990c	PFF0990c		PFF0990c	PFF0990c	PFF0990c						PFF0990c	PFF0990c			PFF0990c			PFF0990c	PFF0990c		PFF0990c	PFF0990c
PFF0995c	PFF0995c		PFF0995c	PFF0995c	PFF0995c				PFF0995c	PFF0995c	PFF0995c	PFF0995c	PFF0995c	PFF0995c	PFF0995c	PFF0995c		PFF0995c	PFF0995c	PFF0995c	PFF0995c	PFF0995c	PFF0995c	PFF0995c
PFF1000w	PFF1000w		PFF1000w	PFF1000w	PFF1000w	PFF1000w			PFF1000w	PFF1000w	PFF1000w	PFF1000w	PFF1000w	PFF1000w	PFF1000w	PFF1000w		PFF1000w	PFF1000w		PFF1000w	PFF1000w	PFF1000w	PFF1000w
PFF1005w	PFF1005w		PFF1005w		PFF1005w	PFF1005w			PFF1005w		PFF1005w	PFF1005w	PFF1005w		PFF1005w	PFF1005w		PFF1005w	PFF1005w		PFF1005w			PFF1005w
PFF1010c	PFF1010c	PFF1010c	PFF1010c		PFF1010c	PFF1010c			PFF1010c	PFF1010c	PFF1010c	PFF1010c	PFF1010c		PFF1010c	PFF1010c	PFF1010c	PFF1010c	PFF1010c	PFF1010c	PFF1010c	PFF1010c		PFF1010c
PFF1015w	PFF1015w	PFF1015w	PFF1015w		PFF1015w	PFF1015w			PFF1015w		PFF1015w	PFF1015w	PFF1015w		PFF1015w	PFF1015w		PFF1015w	PFF1015w	PFF1015w	PFF1015w	PFF1015w
PFF1020c	PFF1020c		PFF1020c	PFF1020c	PFF1020c	PFF1020c			PFF1020c	PFF1020c	PFF1020c	PFF1020c	PFF1020c		PFF1020c	PFF1020c	PFF1020c	PFF1020c	PFF1020c		PFF1020c	PFF1020c		PFF1020c
PFF1025c	PFF1025c		PFF1025c		PFF1025c				PFF1025c	PFF1025c	PFF1025c	PFF1025c	PFF1025c		PFF1025c	PFF1025c		PFF1025c	PFF1025c		PFF1025c	PFF1025c		PFF1025c
PFF1030w	PFF1030w		PFF1030w		PFF1030w				PFF1030w	PFF1030w	PFF1030w	PFF1030w	PFF1030w		PFF1030w	PFF1030w		PFF1030w	PFF1030w		PFF1030w	PFF1030w		PFF1030w
PFF1035w	PFF1035w	PFF1035w	PFF1035w	PFF1035w	PFF1035w	PFF1035w			PFF1035w	PFF1035w	PFF1035w	PFF1035w	PFF1035w	PFF1035w	PFF1035w	PFF1035w		PFF1035w	PFF1035w		PFF1035w	PFF1035w	PFF1035w	PFF1035w
PFF1040w	PFF1040w		PFF1040w	PFF1040w	PFF1040w				PFF1040w		PFF1040w	PFF1040w	PFF1040w	PFF1040w	PFF1040w			PFF1040w	PFF1040w		PFF1040w	PFF1040w	PFF1040w	PFF1040w
PFF1045w	PFF1045w	PFF1045w	PFF1045w	PFF1045w	PFF1045w	PFF1045w		PFF1045w	PFF1045w		PFF1045w	PFF1045w	PFF1045w	PFF1045w	PFF1045w	PFF1045w		PFF1045w	PFF1045w	PFF1045w	PFF1045w	PFF1045w	PFF1045w	PFF1045w
PFF1050w	PFF1050w		PFF1050w		PFF1050w	PFF1050w			PFF1050w	PFF1050w	PFF1050w	PFF1050w			PFF1050w	PFF1050w		PFF1050w	PFF1050w		PFF1050w	PFF1050w	PFF1050w	PFF1050w
PFF1055c	PFF1055c	PFF1055c	PFF1055c		PFF1055c	PFF1055c			PFF1055c		PFF1055c	PFF1055c	PFF1055c		PFF1055c			PFF1055c	PFF1055c		PFF1055c	PFF1055c		PFF1055c
PFF1060w	PFF1060w	PFF1060w	PFF1060w		PFF1060w	PFF1060w			PFF1060w		PFF1060w	PFF1060w	PFF1060w		PFF1060w			PFF1060w	PFF1060w		PFF1060w	PFF1060w		PFF1060w
PFF1065c	PFF1065c	PFF1065c	PFF1065c	PFF1065c	PFF1065c	PFF1065c			PFF1065c		PFF1065c	PFF1065c	PFF1065c	PFF1065c	PFF1065c	PFF1065c		PFF1065c	PFF1065c	PFF1065c	PFF1065c	PFF1065c	PFF1065c	PFF1065c
PFF1070c	PFF1070c		PFF1070c	PFF1070c	PFF1070c	PFF1070c			PFF1070c	PFF1070c	PFF1070c	PFF1070c	PFF1070c		PFF1070c			PFF1070c	PFF1070c		PFF1070c	PFF1070c		PFF1070c
PFF1075w	PFF1075w		PFF1075w	PFF1075w	PFF1075w	PFF1075w			PFF1075w	PFF1075w	PFF1075w	PFF1075w	PFF1075w		PFF1075w			PFF1075w	PFF1075w		PFF1075w	PFF1075w		PFF1075w
PFF1080w	PFF1080w	PFF1080w			PFF1080w				PFF1080w		PFF1080w	PFF1080w	PFF1080w		PFF1080w			PFF1080w	PFF1080w		PFF1080w	PFF1080w		PFF1080w
PFF1085c	PFF1085c		PFF1085c		PFF1085c	PFF1085c			PFF1085c	PFF1085c	PFF1085c	PFF1085c	PFF1085c		PFF1085c			PFF1085c	PFF1085c		PFF1085c	PFF1085c		PFF1085c
PFF1085a	PFF1085a		PFF1085a		PFF1085a	PFF1085a			PFF1085a	PFF1085a	PFF1085a	PFF1085a	PFF1085a		PFF1085a			PFF1085a	PFF1085a		PFF1085a	PFF1085a		PFF1085a
PFF1090c	PFF1090c		PFF1090c	PFF1090c	PFF1090c	PFF1090c			PFF1090c	PFF1090c	PFF1090c	PFF1090c	PFF1090c	PFF1090c	PFF1090c	PFF1090c		PFF1090c	PFF1090c	PFF1090c	PFF1090c	PFF1090c	PFF1090c	PFF1090c
PFF1095w	PFF1095w		PFF1095w	PFF1095w	PFF1095w	PFF1095w			PFF1095w	PFF1095w	PFF1095w	PFF1095w	PFF1095w		PFF1095w	PFF1095w		PFF1095w	PFF1095w	PFF1095w	PFF1095w	PFF1095w	PFF1095w	PFF1095w
PFF1100c	PFF1100c		PFF1100c		PFF1100c	PFF1100c			PFF1100c	PFF1100c	PFF1100c	PFF1100c	PFF1100c		PFF1100c			PFF1100c	PFF1100c	PFF1100c	PFF1100c	PFF1100c		PFF1100c
PFF1105c	PFF1105c		PFF1105c		PFF1105c	PFF1105c	PFF1105c				PFF1105c	PFF1105c			PFF1105c	PFF1105c		PFF1105c	PFF1105c	PFF1105c	PFF1105c	PFF1105c
PFF1110c	PFF1110c		PFF1110c		PFF1110c	PFF1110c			PFF1110c		PFF1110c	PFF1110c	PFF1110c		PFF1110c	PFF1110c		PFF1110c	PFF1110c		PFF1110c	PFF1110c
PFF1115w	PFF1115w		PFF1115w		PFF1115w	PFF1115w			PFF1115w		PFF1115w	PFF1115w	PFF1115w		PFF1115w	PFF1115w		PFF1115w	PFF1115w		PFF1115w	PFF1115w
PFF1120c	PFF1120c		PFF1120c		PFF1120c	PFF1120c			PFF1120c		PFF1120c	PFF1120c	PFF1120c		PFF1120c	PFF1120c		PFF1120c	PFF1120c		PFF1120c	PFF1120c		PFF1120c
PFF1125c	PFF1125c	PFF1125c	PFF1125c		PFF1125c	PFF1125c			PFF1125c		PFF1125c	PFF1125c	PFF1125c	PFF1125c	PFF1125c	PFF1125c		PFF1125c	PFF1125c		PFF1125c	PFF1125c	PFF1125c	PFF1125c
PFF1130c	PFF1130c		PFF1130c	PFF1130c	PFF1130c	PFF1130c					PFF1130c	PFF1130c	PFF1130c	PFF1130c	PFF1130c	PFF1130c		PFF1130c	PFF1130c		PFF1130c	PFF1130c	PFF1130c	PFF1130c
PFF1135w	PFF1135w		PFF1135w	PFF1135w	PFF1135w	PFF1135w					PFF1135w	PFF1135w	PFF1135w	PFF1135w	PFF1135w	PFF1135w		PFF1135w	PFF1135w		PFF1135w	PFF1135w	PFF1135w	PFF1135w
PFF1140c	PFF1140c		PFF1140c	PFF1140c	PFF1140c	PFF1140c			PFF1140c		PFF1140c	PFF1140c	PFF1140c	PFF1140c	PFF1140c			PFF1140c	PFF1140c		PFF1140c	PFF1140c	PFF1140c	PFF1140c
PFF1145c	PFF1145c		PFF1145c		PFF1145c	PFF1145c			PFF1145c		PFF1145c	PFF1145c	PFF1145c	PFF1145c	PFF1145c	PFF1145c		PFF1145c	PFF1145c		PFF1145c	PFF1145c	PFF1145c
PFF1150w	PFF1150w	PFF1150w	PFF1150w	PFF1150w	PFF1150w	PFF1150w			PFF1150w		PFF1150w	PFF1150w	PFF1150w	PFF1150w	PFF1150w	PFF1150w		PFF1150w	PFF1150w	PFF1150w	PFF1150w	PFF1150w	PFF1150w	PFF1150w
PFF1155w	PFF1155w		PFF1155w	PFF1155w	PFF1155w	PFF1155w			PFF1155w		PFF1155w	PFF1155w			PFF1155w	PFF1155w		PFF1155w	PFF1155w		PFF1155w
PFF1160w	PFF1160w		PFF1160w		PFF1160w	PFF1160w			PFF1160w		PFF1160w	PFF1160w	PFF1160w	PFF1160w	PFF1160w	PFF1160w		PFF1160w	PFF1160w	PFF1160w	PFF1160w		PFF1160w	PFF1160w
PFF1165c	PFF1165c		PFF1165c	PFF1165c	PFF1165c						PFF1165c	PFF1165c	PFF1165c		PFF1165c	PFF1165c		PFF1165c	PFF1165c		PFF1165c			PFF1165c
PFF1170w	PFF1170w		PFF1170w	PFF1170w	PFF1170w						PFF1170w	PFF1170w	PFF1170w		PFF1170w	PFF1170w		PFF1170w	PFF1170w		PFF1170w			PFF1170w
PFF1175c	PFF1175c	PFF1175c	PFF1175c	PFF1175c	PFF1175c	PFF1175c			PFF1175c	PFF1175c	PFF1175c	PFF1175c	PFF1175c	PFF1175c	PFF1175c	PFF1175c		PFF1175c	PFF1175c		PFF1175c	PFF1175c	PFF1175c	PFF1175c
PFF1180w	PFF1180w	PFF1180w	PFF1180w		PFF1180w	PFF1180w			PFF1180w	PFF1180w	PFF1180w	PFF1180w	PFF1180w	PFF1180w	PFF1180w	PFF1180w		PFF1180w	PFF1180w		PFF1180w	PFF1180w	PFF1180w	PFF1180w
PFF1185w	PFF1185w	PFF1185w	PFF1185w	PFF1185w	PFF1185w	PFF1185w			PFF1185w		PFF1185w	PFF1185w	PFF1185w		PFF1185w			PFF1185w	PFF1185w		PFF1185w	PFF1185w		PFF1185w
PFF1190c	PFF1190c		PFF1190c		PFF1190c	PFF1190c			PFF1190c	PFF1190c	PFF1190c	PFF1190c	PFF1190c			PFF1190c	PFF1190c	PFF1190c	PFF1190c		PFF1190c	PFF1190c		PFF1190c
PFF1195c	PFF1195c		PFF1195c	PFF1195c	PFF1195c	PFF1195c			PFF1195c	PFF1195c	PFF1195c	PFF1195c	PFF1195c	PFF1195c	PFF1195c	PFF1195c	PFF1195c	PFF1195c	PFF1195c		PFF1195c	PFF1195c	PFF1195c	PFF1195c
PFF1200w	PFF1200w		PFF1200w	PFF1200w	PFF1200w	PFF1200w			PFF1200w	PFF1200w	PFF1200w	PFF1200w	PFF1200w	PFF1200w	PFF1200w	PFF1200w	PFF1200w	PFF1200w	PFF1200w		PFF1200w	PFF1200w	PFF1200w	PFF1200w
PFF1210w	PFF1210w		PFF1210w		PFF1210w				PFF1210w		PFF1210w	PFF1210w	PFF1210w	PFF1210w	PFF1210w			PFF1210w	PFF1210w		PFF1210w	PFF1210w	PFF1210w	PFF1210w
PFF1215w	PFF1215w	PFF1215w	PFF1215w		PFF1215w	PFF1215w	PFF1215w		PFF1215w	PFF1215w	PFF1215w	PFF1215w	PFF1215w		PFF1215w	PFF1215w		PFF1215w	PFF1215w		PFF1215w	PFF1215w
PFF1220w	PFF1220w		PFF1220w		PFF1220w						PFF1220w	PFF1220w	PFF1220w	PFF1220w	PFF1220w	PFF1220w		PFF1220w			PFF1220w	PFF1220w	PFF1220w
PFF1225c	PFF1225c		PFF1225c	PFF1225c	PFF1225c	PFF1225c		PFF1225c	PFF1225c		PFF1225c	PFF1225c		PFF1225c	PFF1225c	PFF1225c		PFF1225c	PFF1225c	PFF1225c	PFF1225c	PFF1225c	PFF1225c	PFF1225c
PFF1230c	PFF1230c	PFF1230c	PFF1230c	PFF1230c	PFF1230c	PFF1230c			PFF1230c	PFF1230c	PFF1230c	PFF1230c	PFF1230c	PFF1230c	PFF1230c	PFF1230c	PFF1230c	PFF1230c	PFF1230c		PFF1230c	PFF1230c	PFF1230c	PFF1230c
PFF1235w	PFF1235w	PFF1235w	PFF1235w	PFF1235w	PFF1235w	PFF1235w			PFF1235w	PFF1235w	PFF1235w	PFF1235w	PFF1235w	PFF1235w	PFF1235w	PFF1235w	PFF1235w	PFF1235w	PFF1235w		PFF1235w	PFF1235w	PFF1235w	PFF1235w
PFF1240w	PFF1240w		PFF1240w	PFF1240w	PFF1240w	PFF1240w			PFF1240w		PFF1240w	PFF1240w	PFF1240w		PFF1240w			PFF1240w	PFF1240w		PFF1240w	PFF1240w		PFF1240w
PFF1245c	PFF1245c	PFF1245c	PFF1245c	PFF1245c	PFF1245c	PFF1245c			PFF1245c		PFF1245c	PFF1245c			PFF1245c	PFF1245c		PFF1245c	PFF1245c	PFF1245c	PFF1245c	PFF1245c		PFF1245c
PFF1250w	PFF1250w	PFF1250w	PFF1250w	PFF1250w	PFF1250w	PFF1250w			PFF1250w		PFF1250w	PFF1250w	PFF1250w	PFF1250w	PFF1250w	PFF1250w		PFF1250w	PFF1250w	PFF1250w	PFF1250w	PFF1250w	PFF1250w	PFF1250w
PFF1255w	PFF1255w		PFF1255w	PFF1255w	PFF1255w	PFF1255w			PFF1255w		PFF1255w	PFF1255w	PFF1255w	PFF1255w	PFF1255w	PFF1255w		PFF1255w	PFF1255w		PFF1255w	PFF1255w	PFF1255w	PFF1255w
PFF1260c	PFF1260c		PFF1260c	PFF1260c	PFF1260c	PFF1260c			PFF1260c		PFF1260c	PFF1260c	PFF1260c	PFF1260c	PFF1260c	PFF1260c		PFF1260c	PFF1260c		PFF1260c	PFF1260c	PFF1260c	PFF1260c
PFF1265w	PFF1265w		PFF1265w	PFF1265w	PFF1265w	PFF1265w			PFF1265w		PFF1265w	PFF1265w	PFF1265w	PFF1265w	PFF1265w	PFF1265w		PFF1265w	PFF1265w		PFF1265w	PFF1265w	PFF1265w	PFF1265w
PFF1270c	PFF1270c		PFF1270c		PFF1270c				PFF1270c		PFF1270c	PFF1270c	PFF1270c		PFF1270c			PFF1270c	PFF1270c	PFF1270c	PFF1270c	PFF1270c		PFF1270c
PFF1275c	PFF1275c		PFF1275c	PFF1275c	PFF1275c	PFF1275c	PFF1275c		PFF1275c		PFF1275c	PFF1275c	PFF1275c	PFF1275c	PFF1275c	PFF1275c		PFF1275c	PFF1275c		PFF1275c	PFF1275c	PFF1275c	PFF1275c
PFF1280w	PFF1280w		PFF1280w	PFF1280w	PFF1280w	PFF1280w	PFF1280w		PFF1280w		PFF1280w	PFF1280w	PFF1280w	PFF1280w	PFF1280w	PFF1280w		PFF1280w	PFF1280w	PFF1280w	PFF1280w	PFF1280w	PFF1280w	PFF1280w
PFF1285w	PFF1285w		PFF1285w	PFF1285w	PFF1285w	PFF1285w			PFF1285w	PFF1285w	PFF1285w	PFF1285w	PFF1285w	PFF1285w	PFF1285w	PFF1285w	PFF1285w	PFF1285w	PFF1285w		PFF1285w	PFF1285w	PFF1285w	PFF1285w
PFF1290c	PFF1290c	PFF1290c	PFF1290c	PFF1290c	PFF1290c	PFF1290c			PFF1290c	PFF1290c	PFF1290c	PFF1290c	PFF1290c		PFF1290c	PFF1290c		PFF1290c	PFF1290c		PFF1290c	PFF1290c		PFF1290c
PFF1295w	PFF1295w	PFF1295w	PFF1295w	PFF1295w	PFF1295w	PFF1295w			PFF1295w	PFF1295w	PFF1295w	PFF1295w	PFF1295w	PFF1295w	PFF1295w	PFF1295w		PFF1295w	PFF1295w		PFF1295w	PFF1295w	PFF1295w	PFF1295w
PFF1300w	PFF1300w		PFF1300w	PFF1300w	PFF1300w	PFF1300w			PFF1300w		PFF1300w	PFF1300w	PFF1300w	PFF1300w	PFF1300w	PFF1300w		PFF1300w	PFF1300w		PFF1300w	PFF1300w	PFF1300w	PFF1300w
PFF1305w	PFF1305w		PFF1305w	PFF1305w	PFF1305w	PFF1305w			PFF1305w		PFF1305w	PFF1305w	PFF1305w	PFF1305w				PFF1305w	PFF1305w		PFF1305w	PFF1305w	PFF1305w
PFF1310c	PFF1310c	PFF1310c	PFF1310c	PFF1310c	PFF1310c	PFF1310c			PFF1310c		PFF1310c	PFF1310c	PFF1310c		PFF1310c	PFF1310c		PFF1310c	PFF1310c		PFF1310c	PFF1310c		PFF1310c
PFF1315w	PFF1315w		PFF1315w	PFF1315w	PFF1315w	PFF1315w			PFF1315w	PFF1315w	PFF1315w	PFF1315w	PFF1315w	PFF1315w	PFF1315w	PFF1315w	PFF1315w	PFF1315w	PFF1315w		PFF1315w	PFF1315w	PFF1315w	PFF1315w
PFF1320c	PFF1320c		PFF1320c	PFF1320c	PFF1320c	PFF1320c			PFF1320c	PFF1320c	PFF1320c	PFF1320c	PFF1320c		PFF1320c	PFF1320c		PFF1320c	PFF1320c	PFF1320c	PFF1320c
PFF1325c	PFF1325c	PFF1325c	PFF1325c	PFF1325c	PFF1325c	PFF1325c			PFF1325c	PFF1325c	PFF1325c	PFF1325c	PFF1325c	PFF1325c	PFF1325c	PFF1325c		PFF1325c	PFF1325c		PFF1325c	PFF1325c	PFF1325c	PFF1325c
PFF1330c	PFF1330c		PFF1330c		PFF1330c	PFF1330c			PFF1330c		PFF1330c	PFF1330c	PFF1330c		PFF1330c			PFF1330c	PFF1330c		PFF1330c			PFF1330c
PFF1335c	PFF1335c		PFF1335c		PFF1335c	PFF1335c			PFF1335c		PFF1335c	PFF1335c	PFF1335c	PFF1335c	PFF1335c			PFF1335c	PFF1335c		PFF1335c	PFF1335c	PFF1335c
PFF1340w	PFF1340w		PFF1340w		PFF1340w	PFF1340w			PFF1340w		PFF1340w	PFF1340w	PFF1340w	PFF1340w	PFF1340w			PFF1340w	PFF1340w		PFF1340w	PFF1340w	PFF1340w
PFF1345w	PFF1345w	PFF1345w	PFF1345w	PFF1345w	PFF1345w	PFF1345w			PFF1345w	PFF1345w	PFF1345w	PFF1345w	PFF1345w		PFF1345w	PFF1345w		PFF1345w	PFF1345w		PFF1345w	PFF1345w
PFF1350c	PFF1350c		PFF1350c	PFF1350c	PFF1350c	PFF1350c			PFF1350c	PFF1350c	PFF1350c	PFF1350c	PFF1350c		PFF1350c	PFF1350c		PFF1350c	PFF1350c		PFF1350c	PFF1350c		PFF1350c
PFF1355w	PFF1355w		PFF1355w	PFF1355w	PFF1355w	PFF1355w			PFF1355w	PFF1355w	PFF1355w	PFF1355w	PFF1355w		PFF1355w	PFF1355w		PFF1355w	PFF1355w		PFF1355w	PFF1355w		PFF1355w
PFF1360w	PFF1360w		PFF1360w		PFF1360w	PFF1360w			PFF1360w		PFF1360w	PFF1360w				PFF1360w		PFF1360w			PFF1360w	PFF1360w
PFF1365c	PFF1365c		PFF1365c	PFF1365c	PFF1365c	PFF1365c			PFF1365c	PFF1365c	PFF1365c	PFF1365c	PFF1365c	PFF1365c	PFF1365c	PFF1365c	PFF1365c	PFF1365c	PFF1365c	PFF1365c	PFF1365c	PFF1365c	PFF1365c	PFF1365c
PFF1370w	PFF1370w	PFF1370w	PFF1370w	PFF1370w	PFF1370w	PFF1370w	PFF1370w		PFF1370w		PFF1370w	PFF1370w	PFF1370w	PFF1370w	PFF1370w	PFF1370w		PFF1370w	PFF1370w	PFF1370w	PFF1370w	PFF1370w	PFF1370w	PFF1370w
PFF1375c	PFF1375c	PFF1375c	PFF1375c	PFF1375c	PFF1375c	PFF1375c			PFF1375c		PFF1375c	PFF1375c		PFF1375c	PFF1375c	PFF1375c		PFF1375c	PFF1375c	PFF1375c	PFF1375c	PFF1375c	PFF1375c	PFF1375c
PFF1377w	PFF1377w	PFF1377w	PFF1377w	PFF1377w	PFF1377w	PFF1377w			PFF1377w	PFF1377w	PFF1377w	PFF1377w	PFF1377w	PFF1377w	PFF1377w	PFF1377w	PFF1377w	PFF1377w	PFF1377w	PFF1377w	PFF1377w		PFF1377w	PFF1377w
PFF1380c	PFF1380c		PFF1380c	PFF1380c	PFF1380c				PFF1380c	PFF1380c	PFF1380c	PFF1380c			PFF1380c	PFF1380c		PFF1380c	PFF1380c		PFF1380c	PFF1380c
PFF1385c	PFF1385c		PFF1385c	PFF1385c	PFF1385c	PFF1385c	PFF1385c		PFF1385c	PFF1385c	PFF1385c	PFF1385c	PFF1385c	PFF1385c	PFF1385c	PFF1385c		PFF1385c	PFF1385c	PFF1385c	PFF1385c	PFF1385c	PFF1385c	PFF1385c
PFF1390w	PFF1390w		PFF1390w	PFF1390w	PFF1390w	PFF1390w	PFF1390w		PFF1390w	PFF1390w	PFF1390w	PFF1390w	PFF1390w	PFF1390w	PFF1390w	PFF1390w		PFF1390w	PFF1390w	PFF1390w	PFF1390w	PFF1390w	PFF1390w	PFF1390w
PFF1395c	PFF1395c		PFF1395c	PFF1395c	PFF1395c	PFF1395c			PFF1395c		PFF1395c	PFF1395c	PFF1395c		PFF1395c	PFF1395c		PFF1395c	PFF1395c		PFF1395c	PFF1395c		PFF1395c
PFF1400w	PFF1400w		PFF1400w	PFF1400w	PFF1400w	PFF1400w			PFF1400w		PFF1400w	PFF1400w	PFF1400w		PFF1400w	PFF1400w		PFF1400w	PFF1400w		PFF1400w	PFF1400w		PFF1400w
PFF1405c	PFF1405c		PFF1405c		PFF1405c						PFF1405c	PFF1405c	PFF1405c	PFF1405c		PFF1405c		PFF1405c	PFF1405c		PFF1405c		PFF1405c
PFF1410c	PFF1410c	PFF1410c	PFF1410c	PFF1410c	PFF1410c	PFF1410c			PFF1410c		PFF1410c	PFF1410c	PFF1410c		PFF1410c	PFF1410c		PFF1410c	PFF1410c		PFF1410c	PFF1410c		PFF1410c
PFF1415c	PFF1415c		PFF1415c		PFF1415c				PFF1415c		PFF1415c	PFF1415c	PFF1415c	PFF1415c	PFF1415c			PFF1415c	PFF1415c	PFF1415c	PFF1415c	PFF1415c	PFF1415c	PFF1415c
PFF1420w	PFF1420w	PFF1420w	PFF1420w	PFF1420w	PFF1420w	PFF1420w			PFF1420w		PFF1420w	PFF1420w	PFF1420w	PFF1420w	PFF1420w	PFF1420w		PFF1420w	PFF1420w		PFF1420w	PFF1420w	PFF1420w	PFF1420w
PFF1425w	PFF1425w		PFF1425w	PFF1425w	PFF1425w	PFF1425w			PFF1425w	PFF1425w	PFF1425w	PFF1425w	PFF1425w	PFF1425w	PFF1425w	PFF1425w		PFF1425w	PFF1425w		PFF1425w	PFF1425w	PFF1425w	PFF1425w
PFF1430c	PFF1430c		PFF1430c	PFF1430c	PFF1430c	PFF1430c	PFF1430c		PFF1430c	PFF1430c	PFF1430c	PFF1430c	PFF1430c	PFF1430c	PFF1430c	PFF1430c	PFF1430c	PFF1430c	PFF1430c		PFF1430c	PFF1430c	PFF1430c	PFF1430c
PFF1435w	PFF1435w	PFF1435w	PFF1435w	PFF1435w	PFF1435w	PFF1435w			PFF1435w		PFF1435w	PFF1435w	PFF1435w		PFF1435w	PFF1435w		PFF1435w	PFF1435w		PFF1435w	PFF1435w		PFF1435w
PFF1440w	PFF1440w		PFF1440w	PFF1440w	PFF1440w	PFF1440w			PFF1440w		PFF1440w	PFF1440w	PFF1440w		PFF1440w	PFF1440w		PFF1440w	PFF1440w		PFF1440w	PFF1440w
PFF1445c	PFF1445c	PFF1445c	PFF1445c		PFF1445c	PFF1445c			PFF1445c	PFF1445c	PFF1445c	PFF1445c	PFF1445c		PFF1445c	PFF1445c		PFF1445c	PFF1445c		PFF1445c	PFF1445c		PFF1445c
PFF1450w	PFF1450w		PFF1450w	PFF1450w	PFF1450w	PFF1450w			PFF1450w		PFF1450w	PFF1450w	PFF1450w	PFF1450w	PFF1450w	PFF1450w		PFF1450w	PFF1450w		PFF1450w	PFF1450w	PFF1450w	PFF1450w
PFF1455c	PFF1455c		PFF1455c	PFF1455c	PFF1455c	PFF1455c			PFF1455c		PFF1455c	PFF1455c	PFF1455c	PFF1455c				PFF1455c	PFF1455c	PFF1455c	PFF1455c	PFF1455c	PFF1455c	PFF1455c
PFF1460c	PFF1460c		PFF1460c	PFF1460c	PFF1460c	PFF1460c			PFF1460c		PFF1460c	PFF1460c	PFF1460c	PFF1460c	PFF1460c	PFF1460c		PFF1460c	PFF1460c		PFF1460c	PFF1460c	PFF1460c	PFF1460c
PFF1465w	PFF1465w		PFF1465w	PFF1465w	PFF1465w	PFF1465w			PFF1465w		PFF1465w	PFF1465w	PFF1465w	PFF1465w	PFF1465w	PFF1465w		PFF1465w	PFF1465w		PFF1465w	PFF1465w	PFF1465w	PFF1465w
PFF1470c	PFF1470c		PFF1470c	PFF1470c	PFF1470c	PFF1470c			PFF1470c	PFF1470c	PFF1470c	PFF1470c	PFF1470c	PFF1470c	PFF1470c	PFF1470c		PFF1470c	PFF1470c		PFF1470c	PFF1470c	PFF1470c	PFF1470c
PFF1475c	PFF1475c	PFF1475c	PFF1475c	PFF1475c	PFF1475c	PFF1475c			PFF1475c		PFF1475c	PFF1475c	PFF1475c	PFF1475c	PFF1475c	PFF1475c		PFF1475c	PFF1475c	PFF1475c	PFF1475c	PFF1475c	PFF1475c	PFF1475c
PFF1480w	PFF1480w	PFF1480w	PFF1480w	PFF1480w	PFF1480w	PFF1480w			PFF1480w		PFF1480w	PFF1480w	PFF1480w		PFF1480w			PFF1480w	PFF1480w		PFF1480w	PFF1480w		PFF1480w
PFF1485w	PFF1485w		PFF1485w	PFF1485w	PFF1485w	PFF1485w	PFF1485w		PFF1485w	PFF1485w	PFF1485w	PFF1485w	PFF1485w	PFF1485w	PFF1485w	PFF1485w	PFF1485w	PFF1485w	PFF1485w	PFF1485w	PFF1485w	PFF1485w	PFF1485w	PFF1485w
PFF1490w	PFF1490w		PFF1490w	PFF1490w	PFF1490w	PFF1490w			PFF1490w		PFF1490w	PFF1490w	PFF1490w	PFF1490w	PFF1490w	PFF1490w		PFF1490w	PFF1490w		PFF1490w	PFF1490w	PFF1490w	PFF1490w
PFF1495w	PFF1495w		PFF1495w		PFF1495w				PFF1495w		PFF1495w	PFF1495w	PFF1495w	PFF1495w	PFF1495w	PFF1495w		PFF1495w	PFF1495w		PFF1495w	PFF1495w	PFF1495w	PFF1495w
PFF1500c	PFF1500c		PFF1500c	PFF1500c	PFF1500c	PFF1500c			PFF1500c	PFF1500c	PFF1500c	PFF1500c	PFF1500c	PFF1500c	PFF1500c	PFF1500c		PFF1500c	PFF1500c		PFF1500c	PFF1500c	PFF1500c	PFF1500c
PFF1505w	PFF1505w		PFF1505w	PFF1505w	PFF1505w	PFF1505w			PFF1505w	PFF1505w	PFF1505w	PFF1505w	PFF1505w	PFF1505w	PFF1505w	PFF1505w		PFF1505w	PFF1505w		PFF1505w	PFF1505w	PFF1505w	PFF1505w
PFF1510w	PFF1510w		PFF1510w	PFF1510w	PFF1510w	PFF1510w	PFF1510w		PFF1510w	PFF1510w	PFF1510w	PFF1510w	PFF1510w	PFF1510w	PFF1510w	PFF1510w		PFF1510w	PFF1510w		PFF1510w	PFF1510w	PFF1510w	PFF1510w
PFF1515c	PFF1515c	PFF1515c	PFF1515c	PFF1515c	PFF1515c	PFF1515c			PFF1515c		PFF1515c	PFF1515c	PFF1515c	PFF1515c	PFF1515c	PFF1515c		PFF1515c	PFF1515c		PFF1515c	PFF1515c	PFF1515c	PFF1515c
PFF1520w	PFF1520w	PFF1520w	PFF1520w	PFF1520w	PFF1520w	PFF1520w			PFF1520w		PFF1520w	PFF1520w	PFF1520w	PFF1520w	PFF1520w	PFF1520w		PFF1520w	PFF1520w		PFF1520w	PFF1520w	PFF1520w	PFF1520w
PFF1525c	PFF1525c	PFF1525c	PFF1525c		PFF1525c	PFF1525c	PFF1525c		PFF1525c	PFF1525c	PFF1525c	PFF1525c	PFF1525c	PFF1525c	PFF1525c	PFF1525c		PFF1525c	PFF1525c		PFF1525c	PFF1525c	PFF1525c	PFF1525c
PFF1530c	PFF1530c		PFF1530c		PFF1530c				PFF1530c		PFF1530c	PFF1530c	PFF1530c		PFF1530c	PFF1530c		PFF1530c	PFF1530c		PFF1530c	PFF1530c		PFF1530c
PFF1535w	PFF1535w		PFF1535w		PFF1535w				PFF1535w		PFF1535w	PFF1535w	PFF1535w		PFF1535w	PFF1535w		PFF1535w	PFF1535w		PFF1535w	PFF1535w		PFF1535w
PFF1540w	PFF1540w		PFF1540w	PFF1540w	PFF1540w	PFF1540w			PFF1540w		PFF1540w	PFF1540w	PFF1540w		PFF1540w	PFF1540w		PFF1540w	PFF1540w		PFF1540w	PFF1540w		PFF1540w
PFF1545w	PFF1545w	PFF1545w	PFF1545w		PFF1545w				PFF1545w		PFF1545w	PFF1545w	PFF1545w		PFF1545w	PFF1545w		PFF1545w	PFF1545w		PFF1545w	PFF1545w		PFF1545w
PFF1550w	PFF1550w		PFF1550w	PFF1550w	PFF1550w	PFF1550w			PFF1550w		PFF1550w	PFF1550w	PFF1550w		PFF1550w	PFF1550w		PFF1550w	PFF1550w	PFF1550w	PFF1550w	PFF1550w		PFF1550w
PFF1555w	PFF1555w		PFF1555w	PFF1555w	PFF1555w	PFF1555w			PFF1555w		PFF1555w	PFF1555w	PFF1555w	PFF1555w	PFF1555w	PFF1555w		PFF1555w	PFF1555w		PFF1555w	PFF1555w	PFF1555w
PFF1560c	PFF1560c		PFF1560c	PFF1560c	PFF1560c				PFF1560c		PFF1560c	PFF1560c	PFF1560c			PFF1560c		PFF1560c	PFF1560c		PFF1560c	PFF1560c		PFF1560c
PFF1565c	PFF1565c		PFF1565c	PFF1565c	PFF1565c	PFF1565c			PFF1565c		PFF1565c	PFF1565c	PFF1565c		PFF1565c	PFF1565c		PFF1565c	PFF1565c	PFF1565c	PFF1565c	PFF1565c
PFF1570w	PFF1570w	PFF1570w	PFF1570w	PFF1570w	PFF1570w	PFF1570w	PFF1570w		PFF1570w		PFF1570w	PFF1570w	PFF1570w		PFF1570w	PFF1570w		PFF1570w	PFF1570w		PFF1570w	PFF1570w		PFF1570w
PFF1575w	PFF1575w		PFF1575w	PFF1575w	PFF1575w	PFF1575w	PFF1575w		PFF1575w		PFF1575w	PFF1575w	PFF1575w		PFF1575w	PFF1575w		PFF1575w	PFF1575w	PFF1575w	PFF1575w	PFF1575w		PFF1575w
PFF1580c	PFF1580c		PFF1580c	PFF1580c	PFF1580c				PFF1580c	PFF1580c	PFF1580c	PFF1580c	PFF1580c		PFF1580c	PFF1580c		PFF1580c	PFF1580c		PFF1580c	PFF1580c		PFF1580c
PFF1585w	PFF1585w		PFF1585w	PFF1585w	PFF1585w				PFF1585w	PFF1585w	PFF1585w	PFF1585w	PFF1585w		PFF1585w	PFF1585w		PFF1585w	PFF1585w		PFF1585w	PFF1585w		PFF1585w
PFF1590w	PFF1590w		PFF1590w	PFF1590w	PFF1590w				PFF1590w		PFF1590w	PFF1590w	PFF1590w		PFF1590w	PFF1590w		PFF1590w	PFF1590w		PFF1590w	PFF1590w		PFF1590w
PFF1595c	PFF1595c	PFF1595c	PFF1595c	PFF1595c	PFF1595c				PFF1595c	PFF1595c	PFF1595c	PFF1595c	PFF1595c		PFF1595c	PFF1595c	PFF1595c	PFF1595c	PFF1595c		PFF1595c	PFF1595c		PFF1595c
MAL7P1.212	MAL7P1.212	MAL7P1.212	MAL7P1.212	MAL7P1.212	MAL7P1.212				MAL7P1.212	MAL7P1.212	MAL7P1.212	MAL7P1.212	MAL7P1.212		MAL7P1.212	MAL7P1.212	MAL7P1.212	MAL7P1.212	MAL7P1.212		MAL7P1.212	MAL7P1.212		MAL7P1.212
MAL7P1.213	MAL7P1.213		MAL7P1.213	MAL7P1.213	MAL7P1.213				MAL7P1.213		MAL7P1.213	MAL7P1.213	MAL7P1.213		MAL7P1.213	MAL7P1.213		MAL7P1.213	MAL7P1.213		MAL7P1.213	MAL7P1.213
MAL7P1.214	MAL7P1.214		MAL7P1.214	MAL7P1.214	MAL7P1.214	MAL7P1.214			MAL7P1.214		MAL7P1.214	MAL7P1.214	MAL7P1.214	MAL7P1.214	MAL7P1.214	MAL7P1.214		MAL7P1.214	MAL7P1.214		MAL7P1.214	MAL7P1.214	MAL7P1.214	MAL7P1.214
MAL7P1.215	MAL7P1.215	MAL7P1.215	MAL7P1.215	MAL7P1.215	MAL7P1.215	MAL7P1.215			MAL7P1.215		MAL7P1.215	MAL7P1.215	MAL7P1.215		MAL7P1.215	MAL7P1.215		MAL7P1.215	MAL7P1.215		MAL7P1.215	MAL7P1.215		MAL7P1.215
MAL7P1.216	MAL7P1.216	MAL7P1.216	MAL7P1.216	MAL7P1.216	MAL7P1.216	MAL7P1.216			MAL7P1.216		MAL7P1.216	MAL7P1.216	MAL7P1.216		MAL7P1.216	MAL7P1.216		MAL7P1.216	MAL7P1.216	MAL7P1.216	MAL7P1.216	MAL7P1.216	MAL7P1.216
MAL7P1.217	MAL7P1.217		MAL7P1.217	MAL7P1.217	MAL7P1.217	MAL7P1.217			MAL7P1.217		MAL7P1.217	MAL7P1.217	MAL7P1.217		MAL7P1.217	MAL7P1.217		MAL7P1.217	MAL7P1.217		MAL7P1.217	MAL7P1.217		MAL7P1.217
MAL7P1.218	MAL7P1.218		MAL7P1.218		MAL7P1.218	MAL7P1.218			MAL7P1.218	MAL7P1.218	MAL7P1.218	MAL7P1.218	MAL7P1.218		MAL7P1.218	MAL7P1.218		MAL7P1.218	MAL7P1.218		MAL7P1.218	MAL7P1.218
MAL7P1.219	MAL7P1.219		MAL7P1.219	MAL7P1.219	MAL7P1.219			MAL7P1.219	MAL7P1.219		MAL7P1.219	MAL7P1.219	MAL7P1.219	MAL7P1.219	MAL7P1.219	MAL7P1.219		MAL7P1.219	MAL7P1.219		MAL7P1.219	MAL7P1.219	MAL7P1.219	MAL7P1.219
MAL7P1.220	MAL7P1.220		MAL7P1.220		MAL7P1.220	MAL7P1.220					MAL7P1.220	MAL7P1.220	MAL7P1.220		MAL7P1.220	MAL7P1.220		MAL7P1.220	MAL7P1.220		MAL7P1.220	MAL7P1.220	MAL7P1.220
MAL7P1.310	MAL7P1.310		MAL7P1.310		MAL7P1.310	MAL7P1.310					MAL7P1.310	MAL7P1.310	MAL7P1.310		MAL7P1.310	MAL7P1.310		MAL7P1.310	MAL7P1.310		MAL7P1.310	MAL7P1.310	MAL7P1.310
MAL7P1.222	MAL7P1.222		MAL7P1.222		MAL7P1.222				MAL7P1.222		MAL7P1.222	MAL7P1.222	MAL7P1.222		MAL7P1.222	MAL7P1.222		MAL7P1.222	MAL7P1.222		MAL7P1.222	MAL7P1.222		MAL7P1.222
MAL7P1.223	MAL7P1.223		MAL7P1.223	MAL7P1.223	MAL7P1.223	MAL7P1.223			MAL7P1.223	MAL7P1.223	MAL7P1.223	MAL7P1.223		MAL7P1.223	MAL7P1.223	MAL7P1.223		MAL7P1.223	MAL7P1.223		MAL7P1.223	MAL7P1.223	MAL7P1.223	MAL7P1.223
MAL7P1.224	MAL7P1.224		MAL7P1.224	MAL7P1.224	MAL7P1.224	MAL7P1.224			MAL7P1.224		MAL7P1.224	MAL7P1.224	MAL7P1.224	MAL7P1.224	MAL7P1.224	MAL7P1.224		MAL7P1.224	MAL7P1.224		MAL7P1.224	MAL7P1.224	MAL7P1.224	MAL7P1.224
MAL7P1.225-a	MAL7P1.225-a		MAL7P1.225-a		MAL7P1.225-a	MAL7P1.225-a			MAL7P1.225-a		MAL7P1.225-a	MAL7P1.225-a	MAL7P1.225-a		MAL7P1.225-a	MAL7P1.225-a		MAL7P1.225-a	MAL7P1.225-a		MAL7P1.225-a	MAL7P1.225-a		MAL7P1.225-a
MAL7P1.225-b	MAL7P1.225-b		MAL7P1.225-b		MAL7P1.225-b	MAL7P1.225-b			MAL7P1.225-b		MAL7P1.225-b	MAL7P1.225-b	MAL7P1.225-b		MAL7P1.225-b	MAL7P1.225-b		MAL7P1.225-b	MAL7P1.225-b		MAL7P1.225-b	MAL7P1.225-b		MAL7P1.225-b
MAL7P1.226	MAL7P1.226		MAL7P1.226	MAL7P1.226	MAL7P1.226	MAL7P1.226			MAL7P1.226		MAL7P1.226	MAL7P1.226	MAL7P1.226	MAL7P1.226	MAL7P1.226	MAL7P1.226		MAL7P1.226	MAL7P1.226		MAL7P1.226	MAL7P1.226	MAL7P1.226	MAL7P1.226
MAL7P1.227	MAL7P1.227	MAL7P1.227	MAL7P1.227	MAL7P1.227	MAL7P1.227	MAL7P1.227			MAL7P1.227		MAL7P1.227	MAL7P1.227	MAL7P1.227		MAL7P1.227	MAL7P1.227		MAL7P1.227	MAL7P1.227		MAL7P1.227	MAL7P1.227		MAL7P1.227
MAL7P1.230	MAL7P1.230	MAL7P1.230	MAL7P1.230		MAL7P1.230	MAL7P1.230			MAL7P1.230	MAL7P1.230	MAL7P1.230	MAL7P1.230	MAL7P1.230	MAL7P1.230	MAL7P1.230	MAL7P1.230		MAL7P1.230	MAL7P1.230		MAL7P1.230	MAL7P1.230	MAL7P1.230	MAL7P1.230
MAL7P1.231	MAL7P1.231		MAL7P1.231		MAL7P1.231				MAL7P1.231		MAL7P1.231	MAL7P1.231	MAL7P1.231		MAL7P1.231	MAL7P1.231		MAL7P1.231	MAL7P1.231		MAL7P1.231	MAL7P1.231		MAL7P1.231
MAL7P1.228	MAL7P1.228		MAL7P1.228		MAL7P1.228	MAL7P1.228			MAL7P1.228		MAL7P1.228	MAL7P1.228	MAL7P1.228	MAL7P1.228	MAL7P1.228	MAL7P1.228		MAL7P1.228	MAL7P1.228		MAL7P1.228	MAL7P1.228	MAL7P1.228	MAL7P1.228
MAL7P1.229	MAL7P1.229		MAL7P1.229	MAL7P1.229	MAL7P1.229	MAL7P1.229			MAL7P1.229	MAL7P1.229	MAL7P1.229	MAL7P1.229	MAL7P1.229		MAL7P1.229	MAL7P1.229	MAL7P1.229	MAL7P1.229	MAL7P1.229		MAL7P1.229	MAL7P1.229		MAL7P1.229
MAL7P1.200	MAL7P1.200		MAL7P1.200	MAL7P1.200	MAL7P1.200	MAL7P1.200			MAL7P1.200		MAL7P1.200	MAL7P1.200	MAL7P1.200		MAL7P1.200	MAL7P1.200		MAL7P1.200	MAL7P1.200		MAL7P1.200	MAL7P1.200		MAL7P1.200
MAL7P1.3	MAL7P1.3		MAL7P1.3		MAL7P1.3				MAL7P1.3		MAL7P1.3	MAL7P1.3	MAL7P1.3		MAL7P1.3	MAL7P1.3		MAL7P1.3	MAL7P1.3		MAL7P1.3	MAL7P1.3		MAL7P1.3
MAL7P1.4	MAL7P1.4		MAL7P1.4		MAL7P1.4				MAL7P1.4		MAL7P1.4	MAL7P1.4	MAL7P1.4		MAL7P1.4	MAL7P1.4		MAL7P1.4	MAL7P1.4		MAL7P1.4	MAL7P1.4		MAL7P1.4
MAL7P1.5	MAL7P1.5	MAL7P1.5	MAL7P1.5		MAL7P1.5	MAL7P1.5	MAL7P1.5		MAL7P1.5	MAL7P1.5	MAL7P1.5	MAL7P1.5	MAL7P1.5	MAL7P1.5	MAL7P1.5	MAL7P1.5		MAL7P1.5	MAL7P1.5		MAL7P1.5	MAL7P1.5	MAL7P1.5	MAL7P1.5
PF07_0002	PF07_0002		PF07_0002		PF07_0002	PF07_0002			PF07_0002		PF07_0002	PF07_0002	PF07_0002		PF07_0002	PF07_0002		PF07_0002	PF07_0002		PF07_0002	PF07_0002		PF07_0002
PF07_0003	PF07_0003		PF07_0003	PF07_0003	PF07_0003	PF07_0003			PF07_0003	PF07_0003	PF07_0003	PF07_0003	PF07_0003	PF07_0003	PF07_0003	PF07_0003		PF07_0003	PF07_0003	PF07_0003	PF07_0003	PF07_0003	PF07_0003	PF07_0003
PF07_0004	PF07_0004		PF07_0004	PF07_0004	PF07_0004	PF07_0004			PF07_0004	PF07_0004	PF07_0004	PF07_0004	PF07_0004					PF07_0004	PF07_0004		PF07_0004	PF07_0004		PF07_0004
MAL7P1.6	MAL7P1.6		MAL7P1.6	MAL7P1.6	MAL7P1.6	MAL7P1.6			MAL7P1.6	MAL7P1.6	MAL7P1.6	MAL7P1.6	MAL7P1.6					MAL7P1.6	MAL7P1.6		MAL7P1.6	MAL7P1.6		MAL7P1.6
MAL7P1.7	MAL7P1.7	MAL7P1.7	MAL7P1.7	MAL7P1.7	MAL7P1.7	MAL7P1.7			MAL7P1.7		MAL7P1.7	MAL7P1.7	MAL7P1.7		MAL7P1.7	MAL7P1.7		MAL7P1.7	MAL7P1.7		MAL7P1.7	MAL7P1.7		MAL7P1.7
PF07_0005	PF07_0005	PF07_0005	PF07_0005		PF07_0005	PF07_0005	PF07_0005		PF07_0005		PF07_0005	PF07_0005			PF07_0005	PF07_0005		PF07_0005	PF07_0005	PF07_0005	PF07_0005	PF07_0005		PF07_0005
PF07_0006	PF07_0006		PF07_0006	PF07_0006	PF07_0006	PF07_0006	PF07_0006		PF07_0006		PF07_0006	PF07_0006	PF07_0006		PF07_0006			PF07_0006	PF07_0006	PF07_0006	PF07_0006	PF07_0006		PF07_0006
PF07_0007	PF07_0007	PF07_0007	PF07_0007	PF07_0007	PF07_0007	PF07_0007			PF07_0007		PF07_0007	PF07_0007	PF07_0007	PF07_0007	PF07_0007	PF07_0007		PF07_0007	PF07_0007		PF07_0007	PF07_0007	PF07_0007	PF07_0007
PF07_0008	PF07_0008		PF07_0008	PF07_0008	PF07_0008	PF07_0008	PF07_0008		PF07_0008		PF07_0008	PF07_0008		PF07_0008	PF07_0008	PF07_0008		PF07_0008	PF07_0008	PF07_0008	PF07_0008		PF07_0008	PF07_0008
PF07_0009	PF07_0009		PF07_0009	PF07_0009	PF07_0009	PF07_0009			PF07_0009		PF07_0009	PF07_0009	PF07_0009		PF07_0009	PF07_0009		PF07_0009	PF07_0009	PF07_0009	PF07_0009	PF07_0009		PF07_0009
MAL7P1.10	MAL7P1.10		MAL7P1.10	MAL7P1.10	MAL7P1.10	MAL7P1.10			MAL7P1.10		MAL7P1.10	MAL7P1.10	MAL7P1.10		MAL7P1.10	MAL7P1.10		MAL7P1.10	MAL7P1.10		MAL7P1.10	MAL7P1.10
PF07_0010	PF07_0010		PF07_0010	PF07_0010	PF07_0010	PF07_0010			PF07_0010		PF07_0010	PF07_0010	PF07_0010		PF07_0010	PF07_0010		PF07_0010	PF07_0010		PF07_0010	PF07_0010
PF07_0011	PF07_0011		PF07_0011		PF07_0011						PF07_0011	PF07_0011	PF07_0011						PF07_0011			PF07_0011
PF07_0012	PF07_0012	PF07_0012	PF07_0012	PF07_0012	PF07_0012				PF07_0012	PF07_0012	PF07_0012	PF07_0012	PF07_0012	PF07_0012	PF07_0012	PF07_0012		PF07_0012	PF07_0012	PF07_0012	PF07_0012	PF07_0012	PF07_0012	PF07_0012
MAL7P1.11	MAL7P1.11	MAL7P1.11	MAL7P1.11	MAL7P1.11	MAL7P1.11				MAL7P1.11	MAL7P1.11	MAL7P1.11	MAL7P1.11	MAL7P1.11	MAL7P1.11	MAL7P1.11	MAL7P1.11		MAL7P1.11	MAL7P1.11	MAL7P1.11	MAL7P1.11	MAL7P1.11	MAL7P1.11	MAL7P1.11
PF07_0013	PF07_0013		PF07_0013	PF07_0013	PF07_0013	PF07_0013			PF07_0013	PF07_0013	PF07_0013	PF07_0013	PF07_0013		PF07_0013	PF07_0013		PF07_0013	PF07_0013		PF07_0013	PF07_0013		PF07_0013
MAL7P1.12	MAL7P1.12	MAL7P1.12	MAL7P1.12		MAL7P1.12				MAL7P1.12		MAL7P1.12	MAL7P1.12			MAL7P1.12			MAL7P1.12	MAL7P1.12		MAL7P1.12	MAL7P1.12		MAL7P1.12
MAL7P1.13	MAL7P1.13		MAL7P1.13	MAL7P1.13	MAL7P1.13	MAL7P1.13			MAL7P1.13	MAL7P1.13	MAL7P1.13	MAL7P1.13	MAL7P1.13	MAL7P1.13	MAL7P1.13			MAL7P1.13	MAL7P1.13		MAL7P1.13	MAL7P1.13	MAL7P1.13	MAL7P1.13
MAL7P1.14	MAL7P1.14		MAL7P1.14	MAL7P1.14	MAL7P1.14	MAL7P1.14			MAL7P1.14		MAL7P1.14	MAL7P1.14	MAL7P1.14		MAL7P1.14	MAL7P1.14		MAL7P1.14	MAL7P1.14	MAL7P1.14	MAL7P1.14	MAL7P1.14		MAL7P1.14
PF07_0014	PF07_0014		PF07_0014	PF07_0014	PF07_0014	PF07_0014			PF07_0014		PF07_0014	PF07_0014	PF07_0014		PF07_0014	PF07_0014		PF07_0014	PF07_0014	PF07_0014	PF07_0014	PF07_0014		PF07_0014
MAL7P1.15	MAL7P1.15		MAL7P1.15		MAL7P1.15	MAL7P1.15			MAL7P1.15	MAL7P1.15	MAL7P1.15	MAL7P1.15	MAL7P1.15			MAL7P1.15	MAL7P1.15	MAL7P1.15		MAL7P1.15	MAL7P1.15	MAL7P1.15		MAL7P1.15
MAL7P1.16	MAL7P1.16	MAL7P1.16	MAL7P1.16	MAL7P1.16	MAL7P1.16	MAL7P1.16			MAL7P1.16	MAL7P1.16	MAL7P1.16	MAL7P1.16		MAL7P1.16	MAL7P1.16	MAL7P1.16		MAL7P1.16	MAL7P1.16		MAL7P1.16	MAL7P1.16	MAL7P1.16	MAL7P1.16
MAL7P1.17	MAL7P1.17	MAL7P1.17	MAL7P1.17	MAL7P1.17	MAL7P1.17				MAL7P1.17	MAL7P1.17	MAL7P1.17	MAL7P1.17		MAL7P1.17	MAL7P1.17	MAL7P1.17	MAL7P1.17	MAL7P1.17	MAL7P1.17		MAL7P1.17	MAL7P1.17	MAL7P1.17	MAL7P1.17
PF07_0015	PF07_0015		PF07_0015	PF07_0015	PF07_0015	PF07_0015			PF07_0015	PF07_0015	PF07_0015	PF07_0015	PF07_0015	PF07_0015	PF07_0015	PF07_0015		PF07_0015	PF07_0015		PF07_0015	PF07_0015	PF07_0015	PF07_0015
PF07_0016	PF07_0016	PF07_0016	PF07_0016	PF07_0016	PF07_0016	PF07_0016			PF07_0016	PF07_0016	PF07_0016	PF07_0016	PF07_0016	PF07_0016	PF07_0016	PF07_0016		PF07_0016	PF07_0016		PF07_0016	PF07_0016	PF07_0016	PF07_0016
PF07_0017	PF07_0017		PF07_0017	PF07_0017	PF07_0017				PF07_0017		PF07_0017	PF07_0017	PF07_0017	PF07_0017	PF07_0017			PF07_0017	PF07_0017		PF07_0017	PF07_0017	PF07_0017	PF07_0017
MAL7P1.18	MAL7P1.18		MAL7P1.18		MAL7P1.18	MAL7P1.18			MAL7P1.18	MAL7P1.18	MAL7P1.18	MAL7P1.18	MAL7P1.18	MAL7P1.18	MAL7P1.18	MAL7P1.18		MAL7P1.18	MAL7P1.18		MAL7P1.18	MAL7P1.18	MAL7P1.18	MAL7P1.18
MAL7P1.19	MAL7P1.19	MAL7P1.19	MAL7P1.19		MAL7P1.19	MAL7P1.19			MAL7P1.19	MAL7P1.19	MAL7P1.19	MAL7P1.19	MAL7P1.19			MAL7P1.19	MAL7P1.19	MAL7P1.19	MAL7P1.19		MAL7P1.19	MAL7P1.19		MAL7P1.19
PF07_0018	PF07_0018		PF07_0018	PF07_0018	PF07_0018	PF07_0018			PF07_0018		PF07_0018	PF07_0018	PF07_0018	PF07_0018	PF07_0018	PF07_0018		PF07_0018	PF07_0018		PF07_0018	PF07_0018	PF07_0018	PF07_0018
PF07_0019	PF07_0019		PF07_0019	PF07_0019	PF07_0019				PF07_0019		PF07_0019	PF07_0019	PF07_0019	PF07_0019	PF07_0019	PF07_0019		PF07_0019	PF07_0019	PF07_0019	PF07_0019	PF07_0019	PF07_0019	PF07_0019
MAL7P1.20	MAL7P1.20		MAL7P1.20		MAL7P1.20	MAL7P1.20			MAL7P1.20		MAL7P1.20	MAL7P1.20	MAL7P1.20		MAL7P1.20	MAL7P1.20		MAL7P1.20	MAL7P1.20		MAL7P1.20	MAL7P1.20		MAL7P1.20
PF07_0020	PF07_0020	PF07_0020	PF07_0020	PF07_0020	PF07_0020	PF07_0020				PF07_0020	PF07_0020	PF07_0020	PF07_0020	PF07_0020	PF07_0020	PF07_0020	PF07_0020	PF07_0020	PF07_0020	PF07_0020	PF07_0020	PF07_0020	PF07_0020	PF07_0020
PF07_0021	PF07_0021	PF07_0021	PF07_0021	PF07_0021	PF07_0021	PF07_0021				PF07_0021	PF07_0021	PF07_0021	PF07_0021	PF07_0021	PF07_0021	PF07_0021	PF07_0021	PF07_0021	PF07_0021	PF07_0021	PF07_0021	PF07_0021	PF07_0021	PF07_0021
PF07_0022	PF07_0022		PF07_0022	PF07_0022	PF07_0022	PF07_0022			PF07_0022		PF07_0022	PF07_0022	PF07_0022		PF07_0022	PF07_0022		PF07_0022	PF07_0022	PF07_0022	PF07_0022	PF07_0022		PF07_0022
MAL7P1.21	MAL7P1.21		MAL7P1.21	MAL7P1.21	MAL7P1.21				MAL7P1.21		MAL7P1.21	MAL7P1.21	MAL7P1.21	MAL7P1.21	MAL7P1.21	MAL7P1.21		MAL7P1.21	MAL7P1.21		MAL7P1.21	MAL7P1.21	MAL7P1.21	MAL7P1.21
PF07_0023	PF07_0023		PF07_0023	PF07_0023	PF07_0023	PF07_0023			PF07_0023		PF07_0023	PF07_0023	PF07_0023	PF07_0023	PF07_0023	PF07_0023		PF07_0023	PF07_0023	PF07_0023	PF07_0023	PF07_0023	PF07_0023	PF07_0023
PF07_0024	PF07_0024	PF07_0024	PF07_0024	PF07_0024	PF07_0024				PF07_0024		PF07_0024	PF07_0024	PF07_0024	PF07_0024	PF07_0024	PF07_0024		PF07_0024	PF07_0024	PF07_0024	PF07_0024	PF07_0024	PF07_0024	PF07_0024
MAL7P1.201	MAL7P1.201		MAL7P1.201	MAL7P1.201	MAL7P1.201	MAL7P1.201			MAL7P1.201		MAL7P1.201	MAL7P1.201	MAL7P1.201	MAL7P1.201	MAL7P1.201	MAL7P1.201		MAL7P1.201	MAL7P1.201		MAL7P1.201	MAL7P1.201	MAL7P1.201
MAL7P1.300	MAL7P1.300		MAL7P1.300		MAL7P1.300	MAL7P1.300			MAL7P1.300	MAL7P1.300	MAL7P1.300	MAL7P1.300	MAL7P1.300		MAL7P1.300	MAL7P1.300	MAL7P1.300	MAL7P1.300	MAL7P1.300		MAL7P1.300	MAL7P1.300		MAL7P1.300
MAL7P1.339	MAL7P1.339		MAL7P1.339	MAL7P1.339	MAL7P1.339	MAL7P1.339			MAL7P1.339	MAL7P1.339	MAL7P1.339	MAL7P1.339	MAL7P1.339	MAL7P1.339	MAL7P1.339		MAL7P1.339	MAL7P1.339	MAL7P1.339	MAL7P1.339	MAL7P1.339	MAL7P1.339	MAL7P1.339	MAL7P1.339
MAL7P1.340	MAL7P1.340		MAL7P1.340		MAL7P1.340	MAL7P1.340			MAL7P1.340		MAL7P1.340	MAL7P1.340		MAL7P1.340	MAL7P1.340	MAL7P1.340		MAL7P1.340	MAL7P1.340		MAL7P1.340	MAL7P1.340	MAL7P1.340	MAL7P1.340
MAL7P1.202	MAL7P1.202		MAL7P1.202		MAL7P1.202	MAL7P1.202			MAL7P1.202		MAL7P1.202	MAL7P1.202		MAL7P1.202	MAL7P1.202	MAL7P1.202		MAL7P1.202	MAL7P1.202		MAL7P1.202	MAL7P1.202	MAL7P1.202	MAL7P1.202
MAL7P1.203	MAL7P1.203		MAL7P1.203	MAL7P1.203	MAL7P1.203	MAL7P1.203			MAL7P1.203		MAL7P1.203	MAL7P1.203	MAL7P1.203	MAL7P1.203	MAL7P1.203	MAL7P1.203		MAL7P1.203	MAL7P1.203		MAL7P1.203	MAL7P1.203	MAL7P1.203	MAL7P1.203
MAL7P1.203b	MAL7P1.203b		MAL7P1.203b	MAL7P1.203b	MAL7P1.203b	MAL7P1.203b			MAL7P1.203b		MAL7P1.203b	MAL7P1.203b	MAL7P1.203b	MAL7P1.203b	MAL7P1.203b	MAL7P1.203b		MAL7P1.203b	MAL7P1.203b		MAL7P1.203b	MAL7P1.203b	MAL7P1.203b	MAL7P1.203b
MAL7P1.203a	MAL7P1.203a	MAL7P1.203a	MAL7P1.203a	MAL7P1.203a	MAL7P1.203a	MAL7P1.203a			MAL7P1.203a		MAL7P1.203a	MAL7P1.203a	MAL7P1.203a	MAL7P1.203a	MAL7P1.203a			MAL7P1.203a	MAL7P1.203a		MAL7P1.203a	MAL7P1.203a	MAL7P1.203a	MAL7P1.203a
MAL7P1.320	MAL7P1.320		MAL7P1.320	MAL7P1.320	MAL7P1.320	MAL7P1.320	MAL7P1.320		MAL7P1.320		MAL7P1.320	MAL7P1.320	MAL7P1.320	MAL7P1.320	MAL7P1.320	MAL7P1.320		MAL7P1.320	MAL7P1.320		MAL7P1.320	MAL7P1.320	MAL7P1.320	MAL7P1.320
MAL7P1.204	MAL7P1.204		MAL7P1.204		MAL7P1.204				MAL7P1.204	MAL7P1.204	MAL7P1.204	MAL7P1.204	MAL7P1.204		MAL7P1.204	MAL7P1.204		MAL7P1.204	MAL7P1.204		MAL7P1.204	MAL7P1.204		MAL7P1.204
MAL7P1.205	MAL7P1.205	MAL7P1.205	MAL7P1.205		MAL7P1.205	MAL7P1.205			MAL7P1.205	MAL7P1.205	MAL7P1.205	MAL7P1.205	MAL7P1.205	MAL7P1.205	MAL7P1.205	MAL7P1.205	MAL7P1.205	MAL7P1.205	MAL7P1.205		MAL7P1.205	MAL7P1.205	MAL7P1.205	MAL7P1.205
MAL7P1.206	MAL7P1.206		MAL7P1.206		MAL7P1.206	MAL7P1.206			MAL7P1.206	MAL7P1.206	MAL7P1.206	MAL7P1.206	MAL7P1.206		MAL7P1.206			MAL7P1.206	MAL7P1.206		MAL7P1.206	MAL7P1.206		MAL7P1.206
MAL7P1.207	MAL7P1.207		MAL7P1.207	MAL7P1.207	MAL7P1.207	MAL7P1.207			MAL7P1.207	MAL7P1.207	MAL7P1.207	MAL7P1.207	MAL7P1.207	MAL7P1.207	MAL7P1.207	MAL7P1.207		MAL7P1.207	MAL7P1.207		MAL7P1.207	MAL7P1.207	MAL7P1.207	MAL7P1.207
MAL7P1.208	MAL7P1.208		MAL7P1.208	MAL7P1.208	MAL7P1.208	MAL7P1.208			MAL7P1.208	MAL7P1.208	MAL7P1.208	MAL7P1.208	MAL7P1.208		MAL7P1.208	MAL7P1.208		MAL7P1.208	MAL7P1.208		MAL7P1.208	MAL7P1.208		MAL7P1.208
MAL7P1.209	MAL7P1.209		MAL7P1.209	MAL7P1.209	MAL7P1.209	MAL7P1.209			MAL7P1.209	MAL7P1.209	MAL7P1.209	MAL7P1.209	MAL7P1.209		MAL7P1.209	MAL7P1.209		MAL7P1.209	MAL7P1.209		MAL7P1.209	MAL7P1.209		MAL7P1.209
MAL7P1.22	MAL7P1.22	MAL7P1.22	MAL7P1.22	MAL7P1.22	MAL7P1.22	MAL7P1.22				MAL7P1.22	MAL7P1.22	MAL7P1.22	MAL7P1.22	MAL7P1.22	MAL7P1.22	MAL7P1.22		MAL7P1.22	MAL7P1.22	MAL7P1.22	MAL7P1.22	MAL7P1.22	MAL7P1.22	MAL7P1.22
PF07_0025	PF07_0025		PF07_0025		PF07_0025		PF07_0025				PF07_0025	PF07_0025						PF07_0025	PF07_0025	PF07_0025	PF07_0025	PF07_0025		PF07_0025
PF07_0026	PF07_0026		PF07_0026	PF07_0026	PF07_0026	PF07_0026			PF07_0026	PF07_0026	PF07_0026	PF07_0026	PF07_0026	PF07_0026	PF07_0026	PF07_0026		PF07_0026	PF07_0026		PF07_0026	PF07_0026	PF07_0026	PF07_0026
MAL7P1.23	MAL7P1.23		MAL7P1.23	MAL7P1.23	MAL7P1.23	MAL7P1.23			MAL7P1.23		MAL7P1.23	MAL7P1.23	MAL7P1.23		MAL7P1.23			MAL7P1.23	MAL7P1.23		MAL7P1.23	MAL7P1.23		MAL7P1.23
MAL7P1.24	MAL7P1.24		MAL7P1.24		MAL7P1.24	MAL7P1.24		MAL7P1.24	MAL7P1.24		MAL7P1.24	MAL7P1.24	MAL7P1.24		MAL7P1.24			MAL7P1.24			MAL7P1.24	MAL7P1.24		MAL7P1.24
MAL7P1.25	MAL7P1.25		MAL7P1.25	MAL7P1.25	MAL7P1.25	MAL7P1.25			MAL7P1.25	MAL7P1.25	MAL7P1.25	MAL7P1.25	MAL7P1.25	MAL7P1.25	MAL7P1.25	MAL7P1.25	MAL7P1.25	MAL7P1.25	MAL7P1.25	MAL7P1.25	MAL7P1.25	MAL7P1.25	MAL7P1.25	MAL7P1.25
PF07_0027	PF07_0027		PF07_0027		PF07_0027	PF07_0027			PF07_0027		PF07_0027	PF07_0027	PF07_0027		PF07_0027	PF07_0027		PF07_0027	PF07_0027		PF07_0027	PF07_0027		PF07_0027
PF07_0028	PF07_0028	PF07_0028	PF07_0028		PF07_0028				PF07_0028		PF07_0028	PF07_0028				PF07_0028		PF07_0028	PF07_0028		PF07_0028		PF07_0028
MAL7P1.26	MAL7P1.26	MAL7P1.26	MAL7P1.26		MAL7P1.26				MAL7P1.26		MAL7P1.26	MAL7P1.26				MAL7P1.26		MAL7P1.26	MAL7P1.26		MAL7P1.26		MAL7P1.26
PF07_0029	PF07_0029	PF07_0029	PF07_0029	PF07_0029	PF07_0029	PF07_0029	PF07_0029		PF07_0029		PF07_0029	PF07_0029	PF07_0029	PF07_0029	PF07_0029			PF07_0029	PF07_0029		PF07_0029	PF07_0029	PF07_0029
PF07_0030	PF07_0030		PF07_0030	PF07_0030	PF07_0030	PF07_0030		PF07_0030	PF07_0030		PF07_0030	PF07_0030	PF07_0030		PF07_0030			PF07_0030	PF07_0030	PF07_0030	PF07_0030			PF07_0030
PF07_0031	PF07_0031		PF07_0031		PF07_0031	PF07_0031			PF07_0031		PF07_0031	PF07_0031	PF07_0031		PF07_0031			PF07_0031	PF07_0031		PF07_0031	PF07_0031		PF07_0031
PF07_0032	PF07_0032		PF07_0032		PF07_0032	PF07_0032	PF07_0032		PF07_0032		PF07_0032	PF07_0032	PF07_0032	PF07_0032	PF07_0032	PF07_0032		PF07_0032	PF07_0032		PF07_0032	PF07_0032	PF07_0032	PF07_0032
PF07_0033	PF07_0033		PF07_0033		PF07_0033	PF07_0033	PF07_0033		PF07_0033		PF07_0033	PF07_0033	PF07_0033			PF07_0033		PF07_0033	PF07_0033		PF07_0033	PF07_0033		PF07_0033
PF07_0034	PF07_0034		PF07_0034		PF07_0034	PF07_0034			PF07_0034		PF07_0034	PF07_0034	PF07_0034		PF07_0034	PF07_0034		PF07_0034	PF07_0034		PF07_0034	PF07_0034	PF07_0034	PF07_0034
MAL7P1.27	MAL7P1.27		MAL7P1.27	MAL7P1.27	MAL7P1.27	MAL7P1.27			MAL7P1.27		MAL7P1.27	MAL7P1.27	MAL7P1.27	MAL7P1.27	MAL7P1.27	MAL7P1.27		MAL7P1.27	MAL7P1.27		MAL7P1.27	MAL7P1.27	MAL7P1.27	MAL7P1.27
PF07_0035	PF07_0035		PF07_0035	PF07_0035	PF07_0035				PF07_0035	PF07_0035	PF07_0035	PF07_0035	PF07_0035		PF07_0035	PF07_0035	PF07_0035	PF07_0035	PF07_0035	PF07_0035	PF07_0035	PF07_0035		PF07_0035
PF07_0036	PF07_0036		PF07_0036		PF07_0036				PF07_0036		PF07_0036	PF07_0036			PF07_0036			PF07_0036	PF07_0036		PF07_0036	PF07_0036		PF07_0036
PF07_0037	PF07_0037		PF07_0037		PF07_0037	PF07_0037			PF07_0037	PF07_0037	PF07_0037	PF07_0037	PF07_0037	PF07_0037	PF07_0037	PF07_0037		PF07_0037	PF07_0037		PF07_0037	PF07_0037	PF07_0037	PF07_0037
PF07_0038	PF07_0038		PF07_0038	PF07_0038	PF07_0038				PF07_0038		PF07_0038	PF07_0038	PF07_0038		PF07_0038			PF07_0038	PF07_0038		PF07_0038	PF07_0038		PF07_0038
PF07_0039	PF07_0039		PF07_0039	PF07_0039	PF07_0039				PF07_0039		PF07_0039	PF07_0039	PF07_0039		PF07_0039			PF07_0039	PF07_0039		PF07_0039	PF07_0039		PF07_0039
MAL7P1.28	MAL7P1.28		MAL7P1.28	MAL7P1.28	MAL7P1.28	MAL7P1.28			MAL7P1.28	MAL7P1.28	MAL7P1.28	MAL7P1.28	MAL7P1.28	MAL7P1.28	MAL7P1.28	MAL7P1.28	MAL7P1.28	MAL7P1.28	MAL7P1.28		MAL7P1.28	MAL7P1.28	MAL7P1.28	MAL7P1.28
PF07_0040	PF07_0040		PF07_0040	PF07_0040	PF07_0040	PF07_0040				PF07_0040	PF07_0040	PF07_0040	PF07_0040	PF07_0040	PF07_0040			PF07_0040	PF07_0040	PF07_0040	PF07_0040	PF07_0040	PF07_0040	PF07_0040
MAL7P1.29a	MAL7P1.29a		MAL7P1.29a	MAL7P1.29a	MAL7P1.29a	MAL7P1.29a				MAL7P1.29a	MAL7P1.29a	MAL7P1.29a	MAL7P1.29a	MAL7P1.29a	MAL7P1.29a			MAL7P1.29a	MAL7P1.29a	MAL7P1.29a	MAL7P1.29a	MAL7P1.29a	MAL7P1.29a	MAL7P1.29a
MAL7P1.29	MAL7P1.29		MAL7P1.29		MAL7P1.29	MAL7P1.29			MAL7P1.29	MAL7P1.29	MAL7P1.29	MAL7P1.29	MAL7P1.29	MAL7P1.29	MAL7P1.29	MAL7P1.29		MAL7P1.29	MAL7P1.29		MAL7P1.29	MAL7P1.29	MAL7P1.29	MAL7P1.29
MAL7P1.30	MAL7P1.30		MAL7P1.30	MAL7P1.30	MAL7P1.30				MAL7P1.30		MAL7P1.30	MAL7P1.30	MAL7P1.30		MAL7P1.30	MAL7P1.30		MAL7P1.30	MAL7P1.30		MAL7P1.30	MAL7P1.30
PF07_0041	PF07_0041		PF07_0041	PF07_0041	PF07_0041				PF07_0041		PF07_0041	PF07_0041	PF07_0041		PF07_0041	PF07_0041		PF07_0041	PF07_0041		PF07_0041	PF07_0041
PF07_0042	PF07_0042	PF07_0042	PF07_0042	PF07_0042	PF07_0042	PF07_0042			PF07_0042	PF07_0042	PF07_0042	PF07_0042		PF07_0042	PF07_0042		PF07_0042	PF07_0042	PF07_0042		PF07_0042	PF07_0042	PF07_0042	PF07_0042
MAL7P1.31	MAL7P1.31		MAL7P1.31	MAL7P1.31	MAL7P1.31	MAL7P1.31			MAL7P1.31		MAL7P1.31	MAL7P1.31	MAL7P1.31		MAL7P1.31			MAL7P1.31	MAL7P1.31		MAL7P1.31	MAL7P1.31		MAL7P1.31
MAL7P1.32	MAL7P1.32		MAL7P1.32	MAL7P1.32	MAL7P1.32	MAL7P1.32			MAL7P1.32		MAL7P1.32	MAL7P1.32	MAL7P1.32		MAL7P1.32			MAL7P1.32	MAL7P1.32		MAL7P1.32	MAL7P1.32		MAL7P1.32
MAL7P1.33	MAL7P1.33		MAL7P1.33	MAL7P1.33	MAL7P1.33	MAL7P1.33			MAL7P1.33		MAL7P1.33	MAL7P1.33	MAL7P1.33		MAL7P1.33	MAL7P1.33		MAL7P1.33	MAL7P1.33		MAL7P1.33	MAL7P1.33		MAL7P1.33
PF07_0043	PF07_0043		PF07_0043		PF07_0043	PF07_0043			PF07_0043	PF07_0043	PF07_0043	PF07_0043	PF07_0043	PF07_0043	PF07_0043	PF07_0043		PF07_0043	PF07_0043		PF07_0043	PF07_0043	PF07_0043	PF07_0043
PF07_0044	PF07_0044		PF07_0044		PF07_0044				PF07_0044		PF07_0044	PF07_0044	PF07_0044		PF07_0044			PF07_0044	PF07_0044		PF07_0044	PF07_0044		PF07_0044
PF07_0045	PF07_0045		PF07_0045		PF07_0045	PF07_0045					PF07_0045	PF07_0045	PF07_0045		PF07_0045	PF07_0045		PF07_0045	PF07_0045		PF07_0045	PF07_0045		PF07_0045
PF07_0046	PF07_0046		PF07_0046		PF07_0046	PF07_0046					PF07_0046	PF07_0046	PF07_0046		PF07_0046	PF07_0046		PF07_0046	PF07_0046		PF07_0046	PF07_0046		PF07_0046
PF07_0047	PF07_0047		PF07_0047	PF07_0047	PF07_0047				PF07_0047		PF07_0047	PF07_0047	PF07_0047	PF07_0047	PF07_0047	PF07_0047		PF07_0047	PF07_0047		PF07_0047	PF07_0047	PF07_0047	PF07_0047
MAL7P1.34	MAL7P1.34	MAL7P1.34	MAL7P1.34	MAL7P1.34	MAL7P1.34	MAL7P1.34		MAL7P1.34	MAL7P1.34	MAL7P1.34	MAL7P1.34	MAL7P1.34	MAL7P1.34		MAL7P1.34	MAL7P1.34		MAL7P1.34	MAL7P1.34		MAL7P1.34	MAL7P1.34		MAL7P1.34
MAL7P1.35	MAL7P1.35	MAL7P1.35	MAL7P1.35	MAL7P1.35	MAL7P1.35	MAL7P1.35		MAL7P1.35	MAL7P1.35	MAL7P1.35	MAL7P1.35	MAL7P1.35	MAL7P1.35		MAL7P1.35	MAL7P1.35		MAL7P1.35	MAL7P1.35		MAL7P1.35	MAL7P1.35		MAL7P1.35
MAL7P1.36	MAL7P1.36		MAL7P1.36		MAL7P1.36	MAL7P1.36			MAL7P1.36		MAL7P1.36	MAL7P1.36	MAL7P1.36					MAL7P1.36	MAL7P1.36		MAL7P1.36	MAL7P1.36		MAL7P1.36
MAL7P1.37	MAL7P1.37		MAL7P1.37	MAL7P1.37	MAL7P1.37	MAL7P1.37			MAL7P1.37		MAL7P1.37	MAL7P1.37	MAL7P1.37		MAL7P1.37	MAL7P1.37		MAL7P1.37	MAL7P1.37		MAL7P1.37	MAL7P1.37		MAL7P1.37
MAL7P1.38	MAL7P1.38		MAL7P1.38	MAL7P1.38	MAL7P1.38	MAL7P1.38			MAL7P1.38		MAL7P1.38	MAL7P1.38	MAL7P1.38		MAL7P1.38	MAL7P1.38		MAL7P1.38	MAL7P1.38		MAL7P1.38	MAL7P1.38		MAL7P1.38
PF07_0048	PF07_0048	PF07_0048	PF07_0048	PF07_0048	PF07_0048	PF07_0048			PF07_0048	PF07_0048	PF07_0048	PF07_0048	PF07_0048		PF07_0048	PF07_0048	PF07_0048	PF07_0048	PF07_0048	PF07_0048	PF07_0048	PF07_0048		PF07_0048
MAL7P1.43	MAL7P1.43		MAL7P1.43	MAL7P1.43	MAL7P1.43				MAL7P1.43	MAL7P1.43	MAL7P1.43	MAL7P1.43	MAL7P1.43	MAL7P1.43	MAL7P1.43	MAL7P1.43	MAL7P1.43	MAL7P1.43	MAL7P1.43		MAL7P1.43	MAL7P1.43	MAL7P1.43	MAL7P1.43
PF07_0049	PF07_0049	PF07_0049	PF07_0049	PF07_0049	PF07_0049				PF07_0049	PF07_0049	PF07_0049	PF07_0049	PF07_0049	PF07_0049	PF07_0049	PF07_0049		PF07_0049	PF07_0049	PF07_0049	PF07_0049	PF07_0049	PF07_0049	PF07_0049
MAL7P1.47	MAL7P1.47		MAL7P1.47	MAL7P1.47	MAL7P1.47				MAL7P1.47		MAL7P1.47	MAL7P1.47	MAL7P1.47		MAL7P1.47	MAL7P1.47		MAL7P1.47	MAL7P1.47		MAL7P1.47	MAL7P1.47		MAL7P1.47
MAL7P1.50	MAL7P1.50	MAL7P1.50	MAL7P1.50	MAL7P1.50	MAL7P1.50	MAL7P1.50			MAL7P1.50	MAL7P1.50	MAL7P1.50	MAL7P1.50	MAL7P1.50	MAL7P1.50	MAL7P1.50	MAL7P1.50		MAL7P1.50	MAL7P1.50	MAL7P1.50	MAL7P1.50	MAL7P1.50	MAL7P1.50	MAL7P1.50
PF07_0050	PF07_0050	PF07_0050	PF07_0050	PF07_0050	PF07_0050	PF07_0050			PF07_0050		PF07_0050	PF07_0050	PF07_0050		PF07_0050	PF07_0050		PF07_0050	PF07_0050		PF07_0050	PF07_0050		PF07_0050
MAL7P1.52	MAL7P1.52	MAL7P1.52	MAL7P1.52	MAL7P1.52	MAL7P1.52				MAL7P1.52		MAL7P1.52	MAL7P1.52	MAL7P1.52	MAL7P1.52	MAL7P1.52	MAL7P1.52		MAL7P1.52	MAL7P1.52		MAL7P1.52	MAL7P1.52	MAL7P1.52	MAL7P1.52
PF07_0051	PF07_0051	PF07_0051	PF07_0051	PF07_0051	PF07_0051	PF07_0051			PF07_0051	PF07_0051	PF07_0051	PF07_0051	PF07_0051	PF07_0051	PF07_0051	PF07_0051	PF07_0051	PF07_0051	PF07_0051	PF07_0051	PF07_0051	PF07_0051	PF07_0051	PF07_0051
MAL7P1.55	MAL7P1.55	MAL7P1.55	MAL7P1.55	MAL7P1.55	MAL7P1.55				MAL7P1.55	MAL7P1.55	MAL7P1.55	MAL7P1.55	MAL7P1.55	MAL7P1.55	MAL7P1.55	MAL7P1.55		MAL7P1.55	MAL7P1.55		MAL7P1.55	MAL7P1.55	MAL7P1.55	MAL7P1.55
MAL7P1.56	MAL7P1.56	MAL7P1.56	MAL7P1.56		MAL7P1.56	MAL7P1.56	MAL7P1.56		MAL7P1.56		MAL7P1.56	MAL7P1.56	MAL7P1.56	MAL7P1.56		MAL7P1.56		MAL7P1.56	MAL7P1.56	MAL7P1.56	MAL7P1.56	MAL7P1.56	MAL7P1.56	MAL7P1.56
MAL7P1.57	MAL7P1.57	MAL7P1.57	MAL7P1.57	MAL7P1.57	MAL7P1.57	MAL7P1.57	MAL7P1.57		MAL7P1.57		MAL7P1.57	MAL7P1.57	MAL7P1.57		MAL7P1.57	MAL7P1.57		MAL7P1.57	MAL7P1.57		MAL7P1.57	MAL7P1.57	MAL7P1.57	MAL7P1.57
MAL7P1.58	MAL7P1.58	MAL7P1.58	MAL7P1.58	MAL7P1.58	MAL7P1.58	MAL7P1.58			MAL7P1.58	MAL7P1.58	MAL7P1.58	MAL7P1.58	MAL7P1.58	MAL7P1.58		MAL7P1.58		MAL7P1.58	MAL7P1.58		MAL7P1.58	MAL7P1.58	MAL7P1.58	MAL7P1.58
MAL7P1.59	MAL7P1.59		MAL7P1.59	MAL7P1.59	MAL7P1.59				MAL7P1.59		MAL7P1.59	MAL7P1.59	MAL7P1.59		MAL7P1.59			MAL7P1.59	MAL7P1.59		MAL7P1.59	MAL7P1.59		MAL7P1.59
MAL7P1.61	MAL7P1.61		MAL7P1.61	MAL7P1.61	MAL7P1.61				MAL7P1.61		MAL7P1.61	MAL7P1.61	MAL7P1.61		MAL7P1.61			MAL7P1.61	MAL7P1.61		MAL7P1.61	MAL7P1.61		MAL7P1.61
MAL7P1.64	MAL7P1.64	MAL7P1.64	MAL7P1.64	MAL7P1.64	MAL7P1.64	MAL7P1.64			MAL7P1.64		MAL7P1.64	MAL7P1.64	MAL7P1.64	MAL7P1.64	MAL7P1.64	MAL7P1.64		MAL7P1.64	MAL7P1.64		MAL7P1.64	MAL7P1.64	MAL7P1.64	MAL7P1.64
MAL7P1.65	MAL7P1.65		MAL7P1.65	MAL7P1.65	MAL7P1.65				MAL7P1.65		MAL7P1.65	MAL7P1.65		MAL7P1.65		MAL7P1.65		MAL7P1.65	MAL7P1.65		MAL7P1.65		MAL7P1.65
MAL7P1.66	MAL7P1.66		MAL7P1.66		MAL7P1.66	MAL7P1.66			MAL7P1.66		MAL7P1.66	MAL7P1.66	MAL7P1.66		MAL7P1.66			MAL7P1.66	MAL7P1.66		MAL7P1.66	MAL7P1.66
MAL7P1.67	MAL7P1.67		MAL7P1.67		MAL7P1.67	MAL7P1.67				MAL7P1.67	MAL7P1.67	MAL7P1.67	MAL7P1.67	MAL7P1.67	MAL7P1.67	MAL7P1.67		MAL7P1.67	MAL7P1.67		MAL7P1.67	MAL7P1.67	MAL7P1.67	MAL7P1.67
PF07_0052	PF07_0052		PF07_0052	PF07_0052	PF07_0052	PF07_0052			PF07_0052	PF07_0052	PF07_0052	PF07_0052	PF07_0052		PF07_0052	PF07_0052	PF07_0052	PF07_0052	PF07_0052		PF07_0052	PF07_0052	PF07_0052	PF07_0052
PF07_0053	PF07_0053		PF07_0053	PF07_0053	PF07_0053	PF07_0053			PF07_0053		PF07_0053	PF07_0053	PF07_0053	PF07_0053	PF07_0053	PF07_0053		PF07_0053	PF07_0053	PF07_0053	PF07_0053	PF07_0053	PF07_0053	PF07_0053
PF07_0054	PF07_0054	PF07_0054	PF07_0054	PF07_0054	PF07_0054	PF07_0054			PF07_0054	PF07_0054	PF07_0054	PF07_0054	PF07_0054	PF07_0054	PF07_0054	PF07_0054		PF07_0054	PF07_0054		PF07_0054	PF07_0054	PF07_0054	PF07_0054
PF07_0055	PF07_0055		PF07_0055		PF07_0055	PF07_0055			PF07_0055	PF07_0055	PF07_0055	PF07_0055	PF07_0055		PF07_0055	PF07_0055	PF07_0055	PF07_0055	PF07_0055		PF07_0055	PF07_0055		PF07_0055
PF07_0056	PF07_0056		PF07_0056		PF07_0056	PF07_0056			PF07_0056	PF07_0056	PF07_0056	PF07_0056	PF07_0056		PF07_0056	PF07_0056	PF07_0056	PF07_0056	PF07_0056		PF07_0056	PF07_0056		PF07_0056
MAL7P1.68	MAL7P1.68		MAL7P1.68	MAL7P1.68	MAL7P1.68	MAL7P1.68			MAL7P1.68		MAL7P1.68	MAL7P1.68	MAL7P1.68	MAL7P1.68	MAL7P1.68			MAL7P1.68	MAL7P1.68		MAL7P1.68	MAL7P1.68	MAL7P1.68	MAL7P1.68
MAL7P1.69	MAL7P1.69	MAL7P1.69	MAL7P1.69	MAL7P1.69	MAL7P1.69	MAL7P1.69	MAL7P1.69		MAL7P1.69		MAL7P1.69	MAL7P1.69	MAL7P1.69	MAL7P1.69	MAL7P1.69	MAL7P1.69		MAL7P1.69	MAL7P1.69	MAL7P1.69	MAL7P1.69	MAL7P1.69	MAL7P1.69	MAL7P1.69
PF07_0057	PF07_0057	PF07_0057	PF07_0057	PF07_0057	PF07_0057	PF07_0057	PF07_0057		PF07_0057		PF07_0057	PF07_0057	PF07_0057	PF07_0057	PF07_0057	PF07_0057		PF07_0057	PF07_0057	PF07_0057	PF07_0057	PF07_0057	PF07_0057	PF07_0057
PF07_0058	PF07_0058		PF07_0058	PF07_0058	PF07_0058	PF07_0058	PF07_0058		PF07_0058		PF07_0058	PF07_0058	PF07_0058	PF07_0058	PF07_0058	PF07_0058		PF07_0058	PF07_0058		PF07_0058	PF07_0058	PF07_0058	PF07_0058
PF07_0059	PF07_0059		PF07_0059	PF07_0059	PF07_0059	PF07_0059			PF07_0059	PF07_0059	PF07_0059	PF07_0059	PF07_0059		PF07_0059	PF07_0059	PF07_0059	PF07_0059	PF07_0059		PF07_0059	PF07_0059		PF07_0059
PF07_0060	PF07_0060		PF07_0060		PF07_0060	PF07_0060			PF07_0060		PF07_0060	PF07_0060	PF07_0060	PF07_0060	PF07_0060	PF07_0060		PF07_0060	PF07_0060	PF07_0060	PF07_0060	PF07_0060	PF07_0060	PF07_0060
PF07_0061	PF07_0061	PF07_0061	PF07_0061	PF07_0061	PF07_0061	PF07_0061			PF07_0061		PF07_0061	PF07_0061	PF07_0061	PF07_0061	PF07_0061	PF07_0061		PF07_0061	PF07_0061		PF07_0061	PF07_0061	PF07_0061	PF07_0061
MAL7P1.73	MAL7P1.73		MAL7P1.73	MAL7P1.73	MAL7P1.73	MAL7P1.73			MAL7P1.73		MAL7P1.73	MAL7P1.73		MAL7P1.73	MAL7P1.73	MAL7P1.73		MAL7P1.73	MAL7P1.73		MAL7P1.73	MAL7P1.73	MAL7P1.73	MAL7P1.73
MAL7P1.74	MAL7P1.74		MAL7P1.74	MAL7P1.74	MAL7P1.74	MAL7P1.74			MAL7P1.74		MAL7P1.74	MAL7P1.74	MAL7P1.74	MAL7P1.74	MAL7P1.74			MAL7P1.74	MAL7P1.74		MAL7P1.74	MAL7P1.74	MAL7P1.74	MAL7P1.74
MAL7P1.75	MAL7P1.75		MAL7P1.75		MAL7P1.75	MAL7P1.75			MAL7P1.75		MAL7P1.75	MAL7P1.75	MAL7P1.75	MAL7P1.75	MAL7P1.75	MAL7P1.75		MAL7P1.75	MAL7P1.75		MAL7P1.75	MAL7P1.75	MAL7P1.75	MAL7P1.75
PF07_0062	PF07_0062		PF07_0062	PF07_0062	PF07_0062	PF07_0062			PF07_0062		PF07_0062	PF07_0062	PF07_0062	PF07_0062	PF07_0062	PF07_0062		PF07_0062	PF07_0062		PF07_0062	PF07_0062	PF07_0062	PF07_0062
PF07_0063	PF07_0063	PF07_0063	PF07_0063		PF07_0063	PF07_0063	PF07_0063		PF07_0063		PF07_0063	PF07_0063	PF07_0063	PF07_0063	PF07_0063			PF07_0063	PF07_0063		PF07_0063	PF07_0063	PF07_0063	PF07_0063
PF07_0064	PF07_0064		PF07_0064	PF07_0064	PF07_0064	PF07_0064			PF07_0064		PF07_0064	PF07_0064	PF07_0064	PF07_0064	PF07_0064	PF07_0064		PF07_0064	PF07_0064		PF07_0064	PF07_0064	PF07_0064	PF07_0064
PF07_0065	PF07_0065		PF07_0065	PF07_0065	PF07_0065	PF07_0065			PF07_0065		PF07_0065	PF07_0065	PF07_0065	PF07_0065	PF07_0065	PF07_0065		PF07_0065	PF07_0065		PF07_0065	PF07_0065	PF07_0065	PF07_0065
PF07_0066	PF07_0066		PF07_0066	PF07_0066	PF07_0066	PF07_0066			PF07_0066		PF07_0066	PF07_0066	PF07_0066		PF07_0066	PF07_0066		PF07_0066	PF07_0066		PF07_0066	PF07_0066		PF07_0066
PF07_0067	PF07_0067		PF07_0067	PF07_0067	PF07_0067				PF07_0067		PF07_0067	PF07_0067	PF07_0067		PF07_0067	PF07_0067		PF07_0067	PF07_0067		PF07_0067	PF07_0067
MAL7P1.76	MAL7P1.76		MAL7P1.76	MAL7P1.76	MAL7P1.76				MAL7P1.76		MAL7P1.76	MAL7P1.76	MAL7P1.76		MAL7P1.76	MAL7P1.76		MAL7P1.76	MAL7P1.76		MAL7P1.76	MAL7P1.76
MAL7P1.77	MAL7P1.77		MAL7P1.77	MAL7P1.77	MAL7P1.77	MAL7P1.77			MAL7P1.77	MAL7P1.77	MAL7P1.77	MAL7P1.77		MAL7P1.77	MAL7P1.77			MAL7P1.77	MAL7P1.77		MAL7P1.77	MAL7P1.77	MAL7P1.77	MAL7P1.77
MAL7P1.78	MAL7P1.78	MAL7P1.78	MAL7P1.78	MAL7P1.78	MAL7P1.78				MAL7P1.78		MAL7P1.78	MAL7P1.78	MAL7P1.78	MAL7P1.78	MAL7P1.78			MAL7P1.78	MAL7P1.78		MAL7P1.78	MAL7P1.78	MAL7P1.78	MAL7P1.78
MAL7P1.79	MAL7P1.79	MAL7P1.79	MAL7P1.79	MAL7P1.79	MAL7P1.79						MAL7P1.79	MAL7P1.79			MAL7P1.79			MAL7P1.79	MAL7P1.79		MAL7P1.79	MAL7P1.79
PF07_0068	PF07_0068		PF07_0068		PF07_0068						PF07_0068	PF07_0068	PF07_0068		PF07_0068			PF07_0068	PF07_0068		PF07_0068	PF07_0068
PF07_0069	PF07_0069		PF07_0069		PF07_0069	PF07_0069				PF07_0069	PF07_0069	PF07_0069		PF07_0069	PF07_0069			PF07_0069	PF07_0069		PF07_0069	PF07_0069	PF07_0069
MAL7P1.81	MAL7P1.81		MAL7P1.81	MAL7P1.81	MAL7P1.81	MAL7P1.81			MAL7P1.81	MAL7P1.81	MAL7P1.81	MAL7P1.81	MAL7P1.81		MAL7P1.81	MAL7P1.81		MAL7P1.81	MAL7P1.81		MAL7P1.81	MAL7P1.81		MAL7P1.81
PF07_0070	PF07_0070		PF07_0070	PF07_0070	PF07_0070	PF07_0070	PF07_0070		PF07_0070	PF07_0070	PF07_0070	PF07_0070	PF07_0070	PF07_0070	PF07_0070	PF07_0070		PF07_0070	PF07_0070		PF07_0070	PF07_0070	PF07_0070	PF07_0070
MAL7P1.82	MAL7P1.82		MAL7P1.82		MAL7P1.82	MAL7P1.82			MAL7P1.82	MAL7P1.82	MAL7P1.82	MAL7P1.82	MAL7P1.82	MAL7P1.82	MAL7P1.82	MAL7P1.82		MAL7P1.82	MAL7P1.82	MAL7P1.82	MAL7P1.82	MAL7P1.82	MAL7P1.82	MAL7P1.82
MAL7P1.83	MAL7P1.83		MAL7P1.83	MAL7P1.83	MAL7P1.83				MAL7P1.83	MAL7P1.83	MAL7P1.83	MAL7P1.83	MAL7P1.83		MAL7P1.83	MAL7P1.83		MAL7P1.83	MAL7P1.83		MAL7P1.83	MAL7P1.83
MAL7P1.84	MAL7P1.84		MAL7P1.84	MAL7P1.84	MAL7P1.84	MAL7P1.84			MAL7P1.84	MAL7P1.84	MAL7P1.84	MAL7P1.84	MAL7P1.84	MAL7P1.84	MAL7P1.84	MAL7P1.84	MAL7P1.84	MAL7P1.84	MAL7P1.84	MAL7P1.84	MAL7P1.84	MAL7P1.84	MAL7P1.84	MAL7P1.84
MAL7P1.86	MAL7P1.86		MAL7P1.86	MAL7P1.86	MAL7P1.86	MAL7P1.86			MAL7P1.86	MAL7P1.86	MAL7P1.86	MAL7P1.86	MAL7P1.86		MAL7P1.86	MAL7P1.86	MAL7P1.86	MAL7P1.86	MAL7P1.86	MAL7P1.86	MAL7P1.86	MAL7P1.86		MAL7P1.86
PF07_0071	PF07_0071		PF07_0071	PF07_0071	PF07_0071	PF07_0071			PF07_0071		PF07_0071	PF07_0071	PF07_0071		PF07_0071	PF07_0071		PF07_0071	PF07_0071		PF07_0071	PF07_0071		PF07_0071
PF07_0072	PF07_0072	PF07_0072	PF07_0072	PF07_0072	PF07_0072	PF07_0072			PF07_0072	PF07_0072	PF07_0072	PF07_0072	PF07_0072	PF07_0072	PF07_0072	PF07_0072		PF07_0072	PF07_0072	PF07_0072	PF07_0072	PF07_0072	PF07_0072	PF07_0072
MAL7P1.87	MAL7P1.87		MAL7P1.87	MAL7P1.87	MAL7P1.87	MAL7P1.87			MAL7P1.87	MAL7P1.87	MAL7P1.87	MAL7P1.87	MAL7P1.87	MAL7P1.87	MAL7P1.87		MAL7P1.87	MAL7P1.87	MAL7P1.87		MAL7P1.87	MAL7P1.87	MAL7P1.87	MAL7P1.87
PF07_0073	PF07_0073		PF07_0073		PF07_0073	PF07_0073			PF07_0073	PF07_0073	PF07_0073	PF07_0073	PF07_0073		PF07_0073			PF07_0073	PF07_0073		PF07_0073			PF07_0073
PF07_0074	PF07_0074		PF07_0074	PF07_0074	PF07_0074	PF07_0074			PF07_0074		PF07_0074	PF07_0074	PF07_0074	PF07_0074	PF07_0074			PF07_0074	PF07_0074		PF07_0074	PF07_0074	PF07_0074	PF07_0074
MAL7P1.88	MAL7P1.88		MAL7P1.88	MAL7P1.88	MAL7P1.88				MAL7P1.88		MAL7P1.88	MAL7P1.88	MAL7P1.88		MAL7P1.88			MAL7P1.88	MAL7P1.88		MAL7P1.88	MAL7P1.88		MAL7P1.88
MAL7P1.89	MAL7P1.89		MAL7P1.89		MAL7P1.89	MAL7P1.89			MAL7P1.89		MAL7P1.89	MAL7P1.89	MAL7P1.89		MAL7P1.89	MAL7P1.89		MAL7P1.89	MAL7P1.89		MAL7P1.89	MAL7P1.89		MAL7P1.89
MAL7P1.91	MAL7P1.91		MAL7P1.91		MAL7P1.91				MAL7P1.91		MAL7P1.91	MAL7P1.91	MAL7P1.91	MAL7P1.91	MAL7P1.91	MAL7P1.91		MAL7P1.91	MAL7P1.91		MAL7P1.91	MAL7P1.91	MAL7P1.91
MAL7P1.92	MAL7P1.92	MAL7P1.92	MAL7P1.92	MAL7P1.92	MAL7P1.92	MAL7P1.92			MAL7P1.92	MAL7P1.92	MAL7P1.92	MAL7P1.92	MAL7P1.92	MAL7P1.92	MAL7P1.92	MAL7P1.92		MAL7P1.92	MAL7P1.92		MAL7P1.92	MAL7P1.92	MAL7P1.92	MAL7P1.92
MAL7P1.93	MAL7P1.93	MAL7P1.93	MAL7P1.93	MAL7P1.93	MAL7P1.93	MAL7P1.93			MAL7P1.93	MAL7P1.93	MAL7P1.93	MAL7P1.93	MAL7P1.93	MAL7P1.93	MAL7P1.93	MAL7P1.93		MAL7P1.93	MAL7P1.93		MAL7P1.93	MAL7P1.93	MAL7P1.93	MAL7P1.93
MAL7P1.94	MAL7P1.94		MAL7P1.94	MAL7P1.94	MAL7P1.94				MAL7P1.94	MAL7P1.94	MAL7P1.94	MAL7P1.94	MAL7P1.94	MAL7P1.94		MAL7P1.94	MAL7P1.94	MAL7P1.94	MAL7P1.94	MAL7P1.94	MAL7P1.94	MAL7P1.94	MAL7P1.94	MAL7P1.94
MAL7P1.95	MAL7P1.95		MAL7P1.95	MAL7P1.95	MAL7P1.95	MAL7P1.95			MAL7P1.95	MAL7P1.95	MAL7P1.95	MAL7P1.95	MAL7P1.95	MAL7P1.95	MAL7P1.95	MAL7P1.95	MAL7P1.95	MAL7P1.95	MAL7P1.95		MAL7P1.95		MAL7P1.95	MAL7P1.95
PF07_0075	PF07_0075		PF07_0075		PF07_0075	PF07_0075			PF07_0075		PF07_0075	PF07_0075	PF07_0075		PF07_0075			PF07_0075	PF07_0075		PF07_0075	PF07_0075		PF07_0075
PF07_0076	PF07_0076		PF07_0076	PF07_0076	PF07_0076	PF07_0076				PF07_0076	PF07_0076	PF07_0076	PF07_0076	PF07_0076	PF07_0076	PF07_0076		PF07_0076	PF07_0076	PF07_0076	PF07_0076	PF07_0076	PF07_0076	PF07_0076
MAL7P1.97	MAL7P1.97		MAL7P1.97	MAL7P1.97	MAL7P1.97	MAL7P1.97				MAL7P1.97	MAL7P1.97	MAL7P1.97	MAL7P1.97	MAL7P1.97	MAL7P1.97	MAL7P1.97		MAL7P1.97	MAL7P1.97	MAL7P1.97	MAL7P1.97	MAL7P1.97	MAL7P1.97	MAL7P1.97
MAL7P1.98	MAL7P1.98		MAL7P1.98		MAL7P1.98	MAL7P1.98			MAL7P1.98		MAL7P1.98	MAL7P1.98	MAL7P1.98		MAL7P1.98	MAL7P1.98		MAL7P1.98	MAL7P1.98		MAL7P1.98	MAL7P1.98		MAL7P1.98
MAL7P1.99	MAL7P1.99		MAL7P1.99		MAL7P1.99	MAL7P1.99				MAL7P1.99	MAL7P1.99	MAL7P1.99	MAL7P1.99		MAL7P1.99			MAL7P1.99	MAL7P1.99		MAL7P1.99	MAL7P1.99		MAL7P1.99
MAL7P1.100	MAL7P1.100		MAL7P1.100		MAL7P1.100	MAL7P1.100				MAL7P1.100	MAL7P1.100	MAL7P1.100	MAL7P1.100		MAL7P1.100			MAL7P1.100	MAL7P1.100		MAL7P1.100	MAL7P1.100		MAL7P1.100
PF07_0077	PF07_0077		PF07_0077	PF07_0077	PF07_0077				PF07_0077	PF07_0077	PF07_0077	PF07_0077	PF07_0077		PF07_0077	PF07_0077		PF07_0077	PF07_0077	PF07_0077	PF07_0077	PF07_0077		PF07_0077
MAL7P1.102	MAL7P1.102		MAL7P1.102	MAL7P1.102	MAL7P1.102	MAL7P1.102			MAL7P1.102	MAL7P1.102	MAL7P1.102	MAL7P1.102	MAL7P1.102	MAL7P1.102	MAL7P1.102	MAL7P1.102		MAL7P1.102	MAL7P1.102		MAL7P1.102	MAL7P1.102	MAL7P1.102	MAL7P1.102
PF07_0078	PF07_0078		PF07_0078	PF07_0078	PF07_0078	PF07_0078			PF07_0078	PF07_0078	PF07_0078	PF07_0078	PF07_0078	PF07_0078		PF07_0078		PF07_0078	PF07_0078		PF07_0078	PF07_0078	PF07_0078	PF07_0078
PF07_0079	PF07_0079		PF07_0079	PF07_0079	PF07_0079	PF07_0079			PF07_0079	PF07_0079	PF07_0079	PF07_0079	PF07_0079		PF07_0079			PF07_0079	PF07_0079		PF07_0079	PF07_0079
PF07_0080	PF07_0080		PF07_0080	PF07_0080	PF07_0080	PF07_0080			PF07_0080	PF07_0080	PF07_0080	PF07_0080	PF07_0080		PF07_0080			PF07_0080	PF07_0080		PF07_0080	PF07_0080
PF07_0081	PF07_0081	PF07_0081	PF07_0081		PF07_0081				PF07_0081		PF07_0081	PF07_0081	PF07_0081		PF07_0081	PF07_0081		PF07_0081	PF07_0081		PF07_0081	PF07_0081		PF07_0081
PF07_0082	PF07_0082	PF07_0082	PF07_0082		PF07_0082				PF07_0082		PF07_0082	PF07_0082	PF07_0082		PF07_0082	PF07_0082		PF07_0082	PF07_0082		PF07_0082	PF07_0082		PF07_0082
MAL7P1.104	MAL7P1.104				MAL7P1.104						MAL7P1.104	MAL7P1.104	MAL7P1.104					MAL7P1.104	MAL7P1.104		MAL7P1.104	MAL7P1.104		MAL7P1.104
PF07_0083	PF07_0083		PF07_0083	PF07_0083	PF07_0083	PF07_0083			PF07_0083	PF07_0083	PF07_0083	PF07_0083	PF07_0083				PF07_0083	PF07_0083	PF07_0083		PF07_0083	PF07_0083	PF07_0083	PF07_0083
PF07_0084	PF07_0084		PF07_0084		PF07_0084	PF07_0084			PF07_0084		PF07_0084	PF07_0084	PF07_0084		PF07_0084			PF07_0084	PF07_0084		PF07_0084	PF07_0084	PF07_0084	PF07_0084
MAL7P1.105	MAL7P1.105		MAL7P1.105	MAL7P1.105	MAL7P1.105	MAL7P1.105			MAL7P1.105	MAL7P1.105	MAL7P1.105	MAL7P1.105	MAL7P1.105		MAL7P1.105	MAL7P1.105	MAL7P1.105	MAL7P1.105	MAL7P1.105	MAL7P1.105	MAL7P1.105	MAL7P1.105	MAL7P1.105
PF07_0085	PF07_0085		PF07_0085	PF07_0085	PF07_0085	PF07_0085			PF07_0085	PF07_0085	PF07_0085	PF07_0085	PF07_0085		PF07_0085	PF07_0085	PF07_0085	PF07_0085	PF07_0085	PF07_0085	PF07_0085	PF07_0085	PF07_0085
MAL7P1.106	MAL7P1.106		MAL7P1.106	MAL7P1.106	MAL7P1.106		MAL7P1.106		MAL7P1.106	MAL7P1.106	MAL7P1.106	MAL7P1.106	MAL7P1.106	MAL7P1.106	MAL7P1.106			MAL7P1.106	MAL7P1.106	MAL7P1.106	MAL7P1.106	MAL7P1.106	MAL7P1.106	MAL7P1.106
MAL7P1.107	MAL7P1.107		MAL7P1.107		MAL7P1.107	MAL7P1.107			MAL7P1.107	MAL7P1.107	MAL7P1.107	MAL7P1.107	MAL7P1.107		MAL7P1.107	MAL7P1.107		MAL7P1.107	MAL7P1.107		MAL7P1.107	MAL7P1.107		MAL7P1.107
MAL7P1.108	MAL7P1.108		MAL7P1.108		MAL7P1.108	MAL7P1.108			MAL7P1.108	MAL7P1.108	MAL7P1.108	MAL7P1.108	MAL7P1.108		MAL7P1.108	MAL7P1.108		MAL7P1.108	MAL7P1.108		MAL7P1.108	MAL7P1.108		MAL7P1.108
MAL7P1.110	MAL7P1.110		MAL7P1.110	MAL7P1.110	MAL7P1.110	MAL7P1.110			MAL7P1.110	MAL7P1.110	MAL7P1.110	MAL7P1.110	MAL7P1.110					MAL7P1.110	MAL7P1.110		MAL7P1.110	MAL7P1.110		MAL7P1.110
MAL7P1.111	MAL7P1.111		MAL7P1.111		MAL7P1.111	MAL7P1.111					MAL7P1.111	MAL7P1.111	MAL7P1.111					MAL7P1.111	MAL7P1.111		MAL7P1.111	MAL7P1.111		MAL7P1.111
PF07_0086	PF07_0086		PF07_0086	PF07_0086	PF07_0086				PF07_0086		PF07_0086	PF07_0086	PF07_0086	PF07_0086	PF07_0086	PF07_0086		PF07_0086	PF07_0086		PF07_0086	PF07_0086	PF07_0086	PF07_0086
PF07_0087	PF07_0087		PF07_0087		PF07_0087	PF07_0087			PF07_0087	PF07_0087	PF07_0087	PF07_0087	PF07_0087		PF07_0087	PF07_0087		PF07_0087	PF07_0087	PF07_0087	PF07_0087	PF07_0087		PF07_0087
MAL7P1.112	MAL7P1.112		MAL7P1.112	MAL7P1.112	MAL7P1.112		MAL7P1.112		MAL7P1.112	MAL7P1.112	MAL7P1.112	MAL7P1.112	MAL7P1.112		MAL7P1.112	MAL7P1.112	MAL7P1.112	MAL7P1.112	MAL7P1.112		MAL7P1.112	MAL7P1.112
MAL7P1.113	MAL7P1.113		MAL7P1.113	MAL7P1.113	MAL7P1.113		MAL7P1.113		MAL7P1.113	MAL7P1.113	MAL7P1.113	MAL7P1.113	MAL7P1.113		MAL7P1.113	MAL7P1.113	MAL7P1.113	MAL7P1.113	MAL7P1.113		MAL7P1.113	MAL7P1.113
MAL7P1.114	MAL7P1.114		MAL7P1.114		MAL7P1.114	MAL7P1.114			MAL7P1.114	MAL7P1.114	MAL7P1.114	MAL7P1.114	MAL7P1.114	MAL7P1.114	MAL7P1.114	MAL7P1.114	MAL7P1.114	MAL7P1.114	MAL7P1.114		MAL7P1.114	MAL7P1.114	MAL7P1.114	MAL7P1.114
MAL7P1.115	MAL7P1.115		MAL7P1.115		MAL7P1.115						MAL7P1.115	MAL7P1.115		MAL7P1.115	MAL7P1.115			MAL7P1.115			MAL7P1.115	MAL7P1.115	MAL7P1.115
PF07_0088	PF07_0088		PF07_0088		PF07_0088	PF07_0088			PF07_0088		PF07_0088	PF07_0088	PF07_0088		PF07_0088	PF07_0088		PF07_0088	PF07_0088	PF07_0088	PF07_0088	PF07_0088		PF07_0088
PF07_0089	PF07_0089		PF07_0089	PF07_0089	PF07_0089	PF07_0089			PF07_0089		PF07_0089	PF07_0089	PF07_0089	PF07_0089	PF07_0089	PF07_0089		PF07_0089	PF07_0089	PF07_0089	PF07_0089	PF07_0089	PF07_0089	PF07_0089
MAL7P1.117	MAL7P1.117		MAL7P1.117		MAL7P1.117	MAL7P1.117		MAL7P1.117	MAL7P1.117		MAL7P1.117	MAL7P1.117	MAL7P1.117	MAL7P1.117	MAL7P1.117	MAL7P1.117		MAL7P1.117	MAL7P1.117		MAL7P1.117	MAL7P1.117	MAL7P1.117	MAL7P1.117
PF07_0090a	PF07_0090a	PF07_0090a	PF07_0090a	PF07_0090a	PF07_0090a	PF07_0090a			PF07_0090a		PF07_0090a	PF07_0090a	PF07_0090a		PF07_0090a	PF07_0090a		PF07_0090a	PF07_0090a		PF07_0090a	PF07_0090a		PF07_0090a
PF07_0090	PF07_0090	PF07_0090	PF07_0090	PF07_0090	PF07_0090	PF07_0090			PF07_0090		PF07_0090	PF07_0090	PF07_0090		PF07_0090	PF07_0090		PF07_0090	PF07_0090		PF07_0090	PF07_0090		PF07_0090
MAL7P1.118	MAL7P1.118		MAL7P1.118	MAL7P1.118	MAL7P1.118	MAL7P1.118			MAL7P1.118		MAL7P1.118	MAL7P1.118	MAL7P1.118		MAL7P1.118	MAL7P1.118		MAL7P1.118	MAL7P1.118	MAL7P1.118	MAL7P1.118	MAL7P1.118		MAL7P1.118
MAL7P1.119	MAL7P1.119		MAL7P1.119	MAL7P1.119	MAL7P1.119	MAL7P1.119		MAL7P1.119	MAL7P1.119	MAL7P1.119	MAL7P1.119	MAL7P1.119		MAL7P1.119	MAL7P1.119	MAL7P1.119	MAL7P1.119	MAL7P1.119	MAL7P1.119		MAL7P1.119	MAL7P1.119	MAL7P1.119	MAL7P1.119
MAL7P1.120	MAL7P1.120		MAL7P1.120	MAL7P1.120	MAL7P1.120	MAL7P1.120		MAL7P1.120	MAL7P1.120	MAL7P1.120	MAL7P1.120	MAL7P1.120	MAL7P1.120	MAL7P1.120	MAL7P1.120	MAL7P1.120		MAL7P1.120	MAL7P1.120	MAL7P1.120	MAL7P1.120	MAL7P1.120	MAL7P1.120	MAL7P1.120
MAL7P1.122	MAL7P1.122		MAL7P1.122	MAL7P1.122	MAL7P1.122	MAL7P1.122		MAL7P1.122	MAL7P1.122	MAL7P1.122	MAL7P1.122	MAL7P1.122	MAL7P1.122	MAL7P1.122	MAL7P1.122	MAL7P1.122		MAL7P1.122	MAL7P1.122	MAL7P1.122	MAL7P1.122	MAL7P1.122	MAL7P1.122	MAL7P1.122
PF07_0091	PF07_0091		PF07_0091	PF07_0091	PF07_0091				PF07_0091		PF07_0091	PF07_0091	PF07_0091		PF07_0091	PF07_0091						PF07_0091		PF07_0091
PF07_0092	PF07_0092		PF07_0092	PF07_0092	PF07_0092	PF07_0092			PF07_0092	PF07_0092	PF07_0092	PF07_0092	PF07_0092		PF07_0092	PF07_0092		PF07_0092	PF07_0092		PF07_0092	PF07_0092	PF07_0092	PF07_0092
PF07_0093	PF07_0093		PF07_0093	PF07_0093	PF07_0093	PF07_0093			PF07_0093	PF07_0093	PF07_0093	PF07_0093	PF07_0093		PF07_0093	PF07_0093		PF07_0093	PF07_0093		PF07_0093	PF07_0093	PF07_0093	PF07_0093
PF07_0094	PF07_0094		PF07_0094		PF07_0094				PF07_0094	PF07_0094	PF07_0094	PF07_0094	PF07_0094		PF07_0094	PF07_0094		PF07_0094	PF07_0094		PF07_0094	PF07_0094	PF07_0094	PF07_0094
MAL7P1.123	MAL7P1.123		MAL7P1.123	MAL7P1.123	MAL7P1.123	MAL7P1.123			MAL7P1.123	MAL7P1.123	MAL7P1.123	MAL7P1.123		MAL7P1.123	MAL7P1.123	MAL7P1.123		MAL7P1.123	MAL7P1.123	MAL7P1.123	MAL7P1.123	MAL7P1.123	MAL7P1.123	MAL7P1.123
PF07_0095	PF07_0095		PF07_0095	PF07_0095	PF07_0095		PF07_0095		PF07_0095		PF07_0095	PF07_0095	PF07_0095		PF07_0095	PF07_0095		PF07_0095	PF07_0095	PF07_0095	PF07_0095	PF07_0095
PF07_0096	PF07_0096		PF07_0096	PF07_0096	PF07_0096	PF07_0096			PF07_0096	PF07_0096	PF07_0096	PF07_0096	PF07_0096	PF07_0096	PF07_0096	PF07_0096	PF07_0096	PF07_0096	PF07_0096		PF07_0096		PF07_0096	PF07_0096
MAL7P1.124	MAL7P1.124		MAL7P1.124	MAL7P1.124	MAL7P1.124	MAL7P1.124			MAL7P1.124	MAL7P1.124	MAL7P1.124	MAL7P1.124	MAL7P1.124	MAL7P1.124	MAL7P1.124	MAL7P1.124	MAL7P1.124	MAL7P1.124	MAL7P1.124		MAL7P1.124		MAL7P1.124	MAL7P1.124
MAL7P1.125	MAL7P1.125		MAL7P1.125	MAL7P1.125	MAL7P1.125				MAL7P1.125		MAL7P1.125	MAL7P1.125	MAL7P1.125	MAL7P1.125	MAL7P1.125			MAL7P1.125	MAL7P1.125		MAL7P1.125	MAL7P1.125	MAL7P1.125	MAL7P1.125
PF07_0097	PF07_0097		PF07_0097	PF07_0097	PF07_0097	PF07_0097			PF07_0097		PF07_0097	PF07_0097	PF07_0097		PF07_0097			PF07_0097	PF07_0097		PF07_0097	PF07_0097		PF07_0097
PF07_0098	PF07_0098	PF07_0098	PF07_0098	PF07_0098	PF07_0098				PF07_0098	PF07_0098	PF07_0098	PF07_0098	PF07_0098		PF07_0098	PF07_0098		PF07_0098	PF07_0098	PF07_0098	PF07_0098	PF07_0098		PF07_0098
PF07_0099	PF07_0099	PF07_0099	PF07_0099	PF07_0099	PF07_0099				PF07_0099	PF07_0099	PF07_0099	PF07_0099	PF07_0099		PF07_0099	PF07_0099		PF07_0099	PF07_0099	PF07_0099	PF07_0099	PF07_0099		PF07_0099
PF07_0100	PF07_0100		PF07_0100		PF07_0100	PF07_0100			PF07_0100		PF07_0100	PF07_0100	PF07_0100		PF07_0100	PF07_0100		PF07_0100	PF07_0100		PF07_0100	PF07_0100		PF07_0100
PF07_0101	PF07_0101		PF07_0101	PF07_0101	PF07_0101			PF07_0101	PF07_0101	PF07_0101	PF07_0101	PF07_0101	PF07_0101		PF07_0101	PF07_0101		PF07_0101	PF07_0101		PF07_0101	PF07_0101		PF07_0101
MAL7P1.126	MAL7P1.126		MAL7P1.126	MAL7P1.126	MAL7P1.126	MAL7P1.126					MAL7P1.126	MAL7P1.126	MAL7P1.126		MAL7P1.126			MAL7P1.126	MAL7P1.126	MAL7P1.126	MAL7P1.126	MAL7P1.126		MAL7P1.126
MAL7P1.127	MAL7P1.127		MAL7P1.127	MAL7P1.127	MAL7P1.127	MAL7P1.127					MAL7P1.127	MAL7P1.127	MAL7P1.127		MAL7P1.127			MAL7P1.127	MAL7P1.127	MAL7P1.127	MAL7P1.127	MAL7P1.127		MAL7P1.127
MAL7P1.129	MAL7P1.129		MAL7P1.129	MAL7P1.129	MAL7P1.129	MAL7P1.129			MAL7P1.129		MAL7P1.129	MAL7P1.129	MAL7P1.129		MAL7P1.129	MAL7P1.129		MAL7P1.129	MAL7P1.129	MAL7P1.129	MAL7P1.129	MAL7P1.129		MAL7P1.129
PF07_0102	PF07_0102		PF07_0102		PF07_0102				PF07_0102		PF07_0102	PF07_0102	PF07_0102		PF07_0102			PF07_0102	PF07_0102		PF07_0102	PF07_0102		PF07_0102
MAL7P1.130	MAL7P1.130		MAL7P1.130		MAL7P1.130				MAL7P1.130		MAL7P1.130	MAL7P1.130	MAL7P1.130		MAL7P1.130			MAL7P1.130	MAL7P1.130		MAL7P1.130	MAL7P1.130		MAL7P1.130
PF07_0103	PF07_0103		PF07_0103	PF07_0103	PF07_0103		PF07_0103		PF07_0103		PF07_0103	PF07_0103	PF07_0103		PF07_0103	PF07_0103		PF07_0103			PF07_0103	PF07_0103		PF07_0103
MAL7P1.131	MAL7P1.131		MAL7P1.131	MAL7P1.131	MAL7P1.131	MAL7P1.131	MAL7P1.131		MAL7P1.131		MAL7P1.131	MAL7P1.131	MAL7P1.131		MAL7P1.131	MAL7P1.131		MAL7P1.131	MAL7P1.131		MAL7P1.131	MAL7P1.131		MAL7P1.131
MAL7P1.132	MAL7P1.132		MAL7P1.132	MAL7P1.132	MAL7P1.132	MAL7P1.132			MAL7P1.132		MAL7P1.132	MAL7P1.132	MAL7P1.132	MAL7P1.132	MAL7P1.132	MAL7P1.132		MAL7P1.132	MAL7P1.132		MAL7P1.132	MAL7P1.132	MAL7P1.132	MAL7P1.132
MAL7P1.134	MAL7P1.134		MAL7P1.134		MAL7P1.134	MAL7P1.134	MAL7P1.134		MAL7P1.134		MAL7P1.134	MAL7P1.134	MAL7P1.134		MAL7P1.134	MAL7P1.134		MAL7P1.134	MAL7P1.134		MAL7P1.134	MAL7P1.134		MAL7P1.134
MAL7P1.137	MAL7P1.137		MAL7P1.137	MAL7P1.137	MAL7P1.137	MAL7P1.137			MAL7P1.137	MAL7P1.137	MAL7P1.137	MAL7P1.137	MAL7P1.137		MAL7P1.137	MAL7P1.137		MAL7P1.137	MAL7P1.137	MAL7P1.137	MAL7P1.137	MAL7P1.137		MAL7P1.137
PF07_0104	PF07_0104		PF07_0104	PF07_0104	PF07_0104	PF07_0104			PF07_0104	PF07_0104	PF07_0104	PF07_0104	PF07_0104	PF07_0104	PF07_0104	PF07_0104		PF07_0104	PF07_0104	PF07_0104	PF07_0104	PF07_0104	PF07_0104	PF07_0104
PF07_0105	PF07_0105		PF07_0105	PF07_0105	PF07_0105		PF07_0105		PF07_0105		PF07_0105	PF07_0105	PF07_0105		PF07_0105	PF07_0105		PF07_0105	PF07_0105	PF07_0105	PF07_0105	PF07_0105		PF07_0105
MAL7P1.138	MAL7P1.138		MAL7P1.138	MAL7P1.138	MAL7P1.138	MAL7P1.138	MAL7P1.138		MAL7P1.138		MAL7P1.138	MAL7P1.138	MAL7P1.138	MAL7P1.138	MAL7P1.138	MAL7P1.138		MAL7P1.138	MAL7P1.138	MAL7P1.138	MAL7P1.138	MAL7P1.138	MAL7P1.138	MAL7P1.138
MAL7P1.139	MAL7P1.139		MAL7P1.139		MAL7P1.139						MAL7P1.139	MAL7P1.139	MAL7P1.139					MAL7P1.139	MAL7P1.139		MAL7P1.139
PF07_0106	PF07_0106		PF07_0106	PF07_0106	PF07_0106	PF07_0106			PF07_0106	PF07_0106	PF07_0106	PF07_0106	PF07_0106	PF07_0106	PF07_0106	PF07_0106		PF07_0106	PF07_0106	PF07_0106	PF07_0106	PF07_0106	PF07_0106	PF07_0106
MAL7P1.141	MAL7P1.141	MAL7P1.141	MAL7P1.141	MAL7P1.141	MAL7P1.141	MAL7P1.141			MAL7P1.141	MAL7P1.141	MAL7P1.141	MAL7P1.141	MAL7P1.141	MAL7P1.141	MAL7P1.141	MAL7P1.141		MAL7P1.141	MAL7P1.141	MAL7P1.141	MAL7P1.141	MAL7P1.141	MAL7P1.141	MAL7P1.141
MAL7P1.142	MAL7P1.142	MAL7P1.142	MAL7P1.142	MAL7P1.142	MAL7P1.142	MAL7P1.142	MAL7P1.142		MAL7P1.142		MAL7P1.142	MAL7P1.142	MAL7P1.142		MAL7P1.142	MAL7P1.142		MAL7P1.142	MAL7P1.142	MAL7P1.142	MAL7P1.142	MAL7P1.142
PF07_0107	PF07_0107		PF07_0107	PF07_0107	PF07_0107				PF07_0107		PF07_0107	PF07_0107	PF07_0107		PF07_0107	PF07_0107		PF07_0107	PF07_0107	PF07_0107	PF07_0107	PF07_0107		PF07_0107
MAL7P1.144	MAL7P1.144	MAL7P1.144	MAL7P1.144	MAL7P1.144	MAL7P1.144	MAL7P1.144	MAL7P1.144	MAL7P1.144	MAL7P1.144		MAL7P1.144	MAL7P1.144	MAL7P1.144	MAL7P1.144	MAL7P1.144	MAL7P1.144		MAL7P1.144	MAL7P1.144		MAL7P1.144	MAL7P1.144	MAL7P1.144	MAL7P1.144
MAL7P1.145	MAL7P1.145		MAL7P1.145		MAL7P1.145					MAL7P1.145	MAL7P1.145	MAL7P1.145	MAL7P1.145		MAL7P1.145			MAL7P1.145	MAL7P1.145		MAL7P1.145	MAL7P1.145		MAL7P1.145
MAL7P1.146	MAL7P1.146		MAL7P1.146	MAL7P1.146	MAL7P1.146	MAL7P1.146			MAL7P1.146	MAL7P1.146	MAL7P1.146	MAL7P1.146	MAL7P1.146	MAL7P1.146	MAL7P1.146			MAL7P1.146	MAL7P1.146		MAL7P1.146	MAL7P1.146	MAL7P1.146	MAL7P1.146
MAL7P1.147	MAL7P1.147		MAL7P1.147		MAL7P1.147	MAL7P1.147		MAL7P1.147	MAL7P1.147		MAL7P1.147	MAL7P1.147	MAL7P1.147	MAL7P1.147	MAL7P1.147	MAL7P1.147		MAL7P1.147	MAL7P1.147		MAL7P1.147	MAL7P1.147	MAL7P1.147	MAL7P1.147
PF07_0108	PF07_0108		PF07_0108	PF07_0108	PF07_0108	PF07_0108			PF07_0108		PF07_0108	PF07_0108	PF07_0108		PF07_0108	PF07_0108		PF07_0108	PF07_0108		PF07_0108	PF07_0108		PF07_0108
PF07_0109	PF07_0109		PF07_0109		PF07_0109	PF07_0109			PF07_0109		PF07_0109	PF07_0109	PF07_0109		PF07_0109	PF07_0109		PF07_0109	PF07_0109		PF07_0109	PF07_0109		PF07_0109
PF07_0109a	PF07_0109a		PF07_0109a		PF07_0109a	PF07_0109a			PF07_0109a		PF07_0109a	PF07_0109a			PF07_0109a	PF07_0109a		PF07_0109a	PF07_0109a		PF07_0109a	PF07_0109a		PF07_0109a
PF07_0110	PF07_0110		PF07_0110		PF07_0110	PF07_0110			PF07_0110		PF07_0110	PF07_0110	PF07_0110		PF07_0110	PF07_0110		PF07_0110	PF07_0110		PF07_0110	PF07_0110		PF07_0110
PF07_0111	PF07_0111		PF07_0111	PF07_0111	PF07_0111	PF07_0111			PF07_0111		PF07_0111	PF07_0111	PF07_0111	PF07_0111	PF07_0111			PF07_0111	PF07_0111	PF07_0111	PF07_0111	PF07_0111	PF07_0111	PF07_0111
MAL7P1.149	MAL7P1.149		MAL7P1.149	MAL7P1.149	MAL7P1.149	MAL7P1.149			MAL7P1.149	MAL7P1.149	MAL7P1.149	MAL7P1.149		MAL7P1.149	MAL7P1.149	MAL7P1.149		MAL7P1.149	MAL7P1.149		MAL7P1.149	MAL7P1.149	MAL7P1.149	MAL7P1.149
MAL7P1.150	MAL7P1.150		MAL7P1.150	MAL7P1.150	MAL7P1.150	MAL7P1.150			MAL7P1.150		MAL7P1.150	MAL7P1.150	MAL7P1.150		MAL7P1.150	MAL7P1.150		MAL7P1.150	MAL7P1.150		MAL7P1.150	MAL7P1.150
MAL7P1.151	MAL7P1.151	MAL7P1.151	MAL7P1.151	MAL7P1.151	MAL7P1.151				MAL7P1.151		MAL7P1.151	MAL7P1.151			MAL7P1.151	MAL7P1.151		MAL7P1.151	MAL7P1.151	MAL7P1.151	MAL7P1.151	MAL7P1.151		MAL7P1.151
PF07_0112	PF07_0112	PF07_0112	PF07_0112	PF07_0112	PF07_0112				PF07_0112		PF07_0112	PF07_0112			PF07_0112	PF07_0112		PF07_0112	PF07_0112	PF07_0112	PF07_0112	PF07_0112		PF07_0112
PF07_0113	PF07_0113		PF07_0113	PF07_0113	PF07_0113	PF07_0113			PF07_0113		PF07_0113	PF07_0113	PF07_0113			PF07_0113		PF07_0113	PF07_0113		PF07_0113	PF07_0113		PF07_0113
MAL7P1.152	MAL7P1.152		MAL7P1.152	MAL7P1.152	MAL7P1.152	MAL7P1.152			MAL7P1.152		MAL7P1.152	MAL7P1.152	MAL7P1.152			MAL7P1.152		MAL7P1.152	MAL7P1.152		MAL7P1.152	MAL7P1.152		MAL7P1.152
PF07_0114	PF07_0114		PF07_0114	PF07_0114	PF07_0114	PF07_0114			PF07_0114		PF07_0114	PF07_0114	PF07_0114	PF07_0114		PF07_0114		PF07_0114	PF07_0114		PF07_0114	PF07_0114	PF07_0114	PF07_0114
PF07_0115	PF07_0115		PF07_0115	PF07_0115	PF07_0115	PF07_0115			PF07_0115		PF07_0115	PF07_0115	PF07_0115	PF07_0115		PF07_0115		PF07_0115	PF07_0115		PF07_0115	PF07_0115	PF07_0115	PF07_0115
PF07_0116	PF07_0116		PF07_0116	PF07_0116	PF07_0116	PF07_0116			PF07_0116	PF07_0116	PF07_0116	PF07_0116	PF07_0116	PF07_0116	PF07_0116	PF07_0116	PF07_0116	PF07_0116	PF07_0116		PF07_0116	PF07_0116	PF07_0116	PF07_0116
PF07_0117	PF07_0117		PF07_0117		PF07_0117	PF07_0117			PF07_0117		PF07_0117	PF07_0117	PF07_0117		PF07_0117			PF07_0117	PF07_0117		PF07_0117	PF07_0117		PF07_0117
PF07_0118	PF07_0118		PF07_0118	PF07_0118	PF07_0118	PF07_0118			PF07_0118		PF07_0118	PF07_0118	PF07_0118	PF07_0118	PF07_0118	PF07_0118		PF07_0118	PF07_0118		PF07_0118	PF07_0118	PF07_0118	PF07_0118
MAL7P1.153	MAL7P1.153		MAL7P1.153	MAL7P1.153	MAL7P1.153	MAL7P1.153			MAL7P1.153		MAL7P1.153	MAL7P1.153	MAL7P1.153	MAL7P1.153	MAL7P1.153	MAL7P1.153		MAL7P1.153	MAL7P1.153		MAL7P1.153	MAL7P1.153	MAL7P1.153	MAL7P1.153
PF07_0119	PF07_0119		PF07_0119	PF07_0119	PF07_0119				PF07_0119	PF07_0119	PF07_0119	PF07_0119	PF07_0119		PF07_0119	PF07_0119	PF07_0119	PF07_0119	PF07_0119		PF07_0119	PF07_0119		PF07_0119
MAL7P1.154	MAL7P1.154			MAL7P1.154	MAL7P1.154				MAL7P1.154	MAL7P1.154	MAL7P1.154	MAL7P1.154	MAL7P1.154		MAL7P1.154	MAL7P1.154	MAL7P1.154	MAL7P1.154	MAL7P1.154	MAL7P1.154	MAL7P1.154	MAL7P1.154		MAL7P1.154
MAL7P1.154a	MAL7P1.154a		MAL7P1.154a	MAL7P1.154a	MAL7P1.154a				MAL7P1.154a		MAL7P1.154a	MAL7P1.154a	MAL7P1.154a		MAL7P1.154a			MAL7P1.154a	MAL7P1.154a		MAL7P1.154a		MAL7P1.154a	MAL7P1.154a
MAL7P1.155	MAL7P1.155		MAL7P1.155	MAL7P1.155	MAL7P1.155				MAL7P1.155		MAL7P1.155	MAL7P1.155	MAL7P1.155		MAL7P1.155			MAL7P1.155	MAL7P1.155		MAL7P1.155		MAL7P1.155	MAL7P1.155
MAL7P1.156	MAL7P1.156	MAL7P1.156	MAL7P1.156	MAL7P1.156	MAL7P1.156	MAL7P1.156	MAL7P1.156		MAL7P1.156	MAL7P1.156	MAL7P1.156	MAL7P1.156	MAL7P1.156	MAL7P1.156	MAL7P1.156	MAL7P1.156		MAL7P1.156	MAL7P1.156		MAL7P1.156	MAL7P1.156	MAL7P1.156	MAL7P1.156
MAL7P1.157	MAL7P1.157	MAL7P1.157	MAL7P1.157	MAL7P1.157	MAL7P1.157	MAL7P1.157	MAL7P1.157		MAL7P1.157	MAL7P1.157	MAL7P1.157	MAL7P1.157	MAL7P1.157	MAL7P1.157	MAL7P1.157	MAL7P1.157		MAL7P1.157	MAL7P1.157		MAL7P1.157	MAL7P1.157	MAL7P1.157	MAL7P1.157
MAL7P1.157a	MAL7P1.157a		MAL7P1.157a		MAL7P1.157a				MAL7P1.157a		MAL7P1.157a	MAL7P1.157a				MAL7P1.157a			MAL7P1.157a			MAL7P1.157a
MAL7P1.158	MAL7P1.158		MAL7P1.158		MAL7P1.158				MAL7P1.158		MAL7P1.158	MAL7P1.158				MAL7P1.158			MAL7P1.158			MAL7P1.158
PF07_0120	PF07_0120		PF07_0120	PF07_0120	PF07_0120				PF07_0120		PF07_0120	PF07_0120	PF07_0120					PF07_0120	PF07_0120	PF07_0120	PF07_0120	PF07_0120		PF07_0120
MAL7P1.159	MAL7P1.159	MAL7P1.159	MAL7P1.159	MAL7P1.159	MAL7P1.159	MAL7P1.159				MAL7P1.159	MAL7P1.159	MAL7P1.159	MAL7P1.159		MAL7P1.159	MAL7P1.159		MAL7P1.159	MAL7P1.159		MAL7P1.159	MAL7P1.159		MAL7P1.159
PF07_0121	PF07_0121		PF07_0121	PF07_0121	PF07_0121	PF07_0121			PF07_0121		PF07_0121	PF07_0121	PF07_0121		PF07_0121	PF07_0121		PF07_0121	PF07_0121	PF07_0121	PF07_0121			PF07_0121
PF07_0122	PF07_0122		PF07_0122	PF07_0122	PF07_0122	PF07_0122			PF07_0122		PF07_0122	PF07_0122	PF07_0122		PF07_0122	PF07_0122		PF07_0122	PF07_0122	PF07_0122	PF07_0122	PF07_0122		PF07_0122
PF07_0123	PF07_0123	PF07_0123	PF07_0123		PF07_0123				PF07_0123		PF07_0123	PF07_0123	PF07_0123					PF07_0123	PF07_0123		PF07_0123	PF07_0123		PF07_0123
MAL7P1.160	MAL7P1.160		MAL7P1.160		MAL7P1.160	MAL7P1.160					MAL7P1.160	MAL7P1.160	MAL7P1.160	MAL7P1.160	MAL7P1.160			MAL7P1.160	MAL7P1.160		MAL7P1.160	MAL7P1.160	MAL7P1.160
PF07_0124	PF07_0124	PF07_0124	PF07_0124	PF07_0124	PF07_0124	PF07_0124			PF07_0124	PF07_0124	PF07_0124	PF07_0124	PF07_0124	PF07_0124	PF07_0124		PF07_0124	PF07_0124	PF07_0124	PF07_0124	PF07_0124	PF07_0124	PF07_0124	PF07_0124
MAL7P1.161	MAL7P1.161	MAL7P1.161	MAL7P1.161	MAL7P1.161	MAL7P1.161	MAL7P1.161			MAL7P1.161	MAL7P1.161	MAL7P1.161	MAL7P1.161	MAL7P1.161	MAL7P1.161	MAL7P1.161		MAL7P1.161	MAL7P1.161	MAL7P1.161	MAL7P1.161	MAL7P1.161	MAL7P1.161	MAL7P1.161	MAL7P1.161
MAL7P1.162	MAL7P1.162	MAL7P1.162	MAL7P1.162		MAL7P1.162	MAL7P1.162			MAL7P1.162	MAL7P1.162	MAL7P1.162	MAL7P1.162	MAL7P1.162	MAL7P1.162	MAL7P1.162	MAL7P1.162	MAL7P1.162	MAL7P1.162	MAL7P1.162		MAL7P1.162	MAL7P1.162	MAL7P1.162	MAL7P1.162
MAL7P1.163	MAL7P1.163		MAL7P1.163		MAL7P1.163					MAL7P1.163	MAL7P1.163	MAL7P1.163			MAL7P1.163	MAL7P1.163	MAL7P1.163	MAL7P1.163	MAL7P1.163		MAL7P1.163			MAL7P1.163
PF07_0125	PF07_0125		PF07_0125		PF07_0125	PF07_0125			PF07_0125	PF07_0125	PF07_0125	PF07_0125			PF07_0125	PF07_0125	PF07_0125	PF07_0125	PF07_0125	PF07_0125	PF07_0125	PF07_0125		PF07_0125
MAL7P1.164	MAL7P1.164		MAL7P1.164		MAL7P1.164	MAL7P1.164			MAL7P1.164		MAL7P1.164	MAL7P1.164	MAL7P1.164	MAL7P1.164	MAL7P1.164	MAL7P1.164		MAL7P1.164	MAL7P1.164	MAL7P1.164	MAL7P1.164	MAL7P1.164	MAL7P1.164
PF07_0126	PF07_0126		PF07_0126		PF07_0126	PF07_0126			PF07_0126		PF07_0126	PF07_0126	PF07_0126		PF07_0126	PF07_0126		PF07_0126	PF07_0126		PF07_0126	PF07_0126		PF07_0126
PF07_0127	PF07_0127	PF07_0127	PF07_0127	PF07_0127	PF07_0127	PF07_0127			PF07_0127	PF07_0127	PF07_0127	PF07_0127	PF07_0127	PF07_0127	PF07_0127	PF07_0127		PF07_0127	PF07_0127		PF07_0127	PF07_0127	PF07_0127	PF07_0127
MAL7P1.167	MAL7P1.167		MAL7P1.167		MAL7P1.167	MAL7P1.167			MAL7P1.167		MAL7P1.167	MAL7P1.167	MAL7P1.167		MAL7P1.167			MAL7P1.167	MAL7P1.167		MAL7P1.167	MAL7P1.167		MAL7P1.167
MAL7P1.170	MAL7P1.170		MAL7P1.170		MAL7P1.170	MAL7P1.170				MAL7P1.170	MAL7P1.170	MAL7P1.170				MAL7P1.170		MAL7P1.170	MAL7P1.170		MAL7P1.170	MAL7P1.170		MAL7P1.170
MAL7P1.171	MAL7P1.171	MAL7P1.171	MAL7P1.171		MAL7P1.171	MAL7P1.171			MAL7P1.171	MAL7P1.171	MAL7P1.171	MAL7P1.171	MAL7P1.171	MAL7P1.171	MAL7P1.171	MAL7P1.171		MAL7P1.171	MAL7P1.171	MAL7P1.171	MAL7P1.171	MAL7P1.171	MAL7P1.171	MAL7P1.171
MAL7P1.172	MAL7P1.172		MAL7P1.172		MAL7P1.172				MAL7P1.172		MAL7P1.172	MAL7P1.172	MAL7P1.172		MAL7P1.172	MAL7P1.172		MAL7P1.172	MAL7P1.172		MAL7P1.172	MAL7P1.172
MAL7P1.173	MAL7P1.173	MAL7P1.173	MAL7P1.173	MAL7P1.173	MAL7P1.173	MAL7P1.173	MAL7P1.173		MAL7P1.173		MAL7P1.173	MAL7P1.173	MAL7P1.173		MAL7P1.173	MAL7P1.173		MAL7P1.173	MAL7P1.173		MAL7P1.173	MAL7P1.173		MAL7P1.173
MAL7P1.174	MAL7P1.174	MAL7P1.174	MAL7P1.174	MAL7P1.174	MAL7P1.174	MAL7P1.174			MAL7P1.174		MAL7P1.174	MAL7P1.174	MAL7P1.174		MAL7P1.174	MAL7P1.174		MAL7P1.174	MAL7P1.174		MAL7P1.174	MAL7P1.174		MAL7P1.174
MAL7P1.175	MAL7P1.175		MAL7P1.175	MAL7P1.175	MAL7P1.175				MAL7P1.175		MAL7P1.175	MAL7P1.175	MAL7P1.175	MAL7P1.175	MAL7P1.175	MAL7P1.175		MAL7P1.175	MAL7P1.175		MAL7P1.175	MAL7P1.175	MAL7P1.175	MAL7P1.175
MAL7P1.176	MAL7P1.176	MAL7P1.176	MAL7P1.176	MAL7P1.176	MAL7P1.176	MAL7P1.176			MAL7P1.176	MAL7P1.176	MAL7P1.176	MAL7P1.176	MAL7P1.176	MAL7P1.176	MAL7P1.176			MAL7P1.176	MAL7P1.176		MAL7P1.176	MAL7P1.176	MAL7P1.176
PF07_0129	PF07_0129		PF07_0129		PF07_0129	PF07_0129			PF07_0129		PF07_0129	PF07_0129	PF07_0129	PF07_0129	PF07_0129	PF07_0129		PF07_0129	PF07_0129		PF07_0129		PF07_0129
MAL7P1.177	MAL7P1.177		MAL7P1.177		MAL7P1.177	MAL7P1.177			MAL7P1.177		MAL7P1.177	MAL7P1.177	MAL7P1.177	MAL7P1.177	MAL7P1.177	MAL7P1.177		MAL7P1.177	MAL7P1.177		MAL7P1.177	MAL7P1.177	MAL7P1.177
MAL7P1.178	MAL7P1.178	MAL7P1.178	MAL7P1.178	MAL7P1.178	MAL7P1.178	MAL7P1.178			MAL7P1.178		MAL7P1.178	MAL7P1.178	MAL7P1.178	MAL7P1.178	MAL7P1.178			MAL7P1.178	MAL7P1.178		MAL7P1.178	MAL7P1.178	MAL7P1.178
MAL7P1.179	MAL7P1.179		MAL7P1.179	MAL7P1.179	MAL7P1.179				MAL7P1.179		MAL7P1.179	MAL7P1.179	MAL7P1.179	MAL7P1.179	MAL7P1.179	MAL7P1.179		MAL7P1.179	MAL7P1.179		MAL7P1.179	MAL7P1.179	MAL7P1.179	MAL7P1.179
PF07_0130	PF07_0130		PF07_0130		PF07_0130	PF07_0130			PF07_0130		PF07_0130	PF07_0130	PF07_0130		PF07_0130	PF07_0130		PF07_0130	PF07_0130		PF07_0130	PF07_0130		PF07_0130
MAL7P1.183	MAL7P1.183		MAL7P1.183		MAL7P1.183				MAL7P1.183		MAL7P1.183	MAL7P1.183	MAL7P1.183	MAL7P1.183	MAL7P1.183	MAL7P1.183		MAL7P1.183	MAL7P1.183		MAL7P1.183		MAL7P1.183	MAL7P1.183
PF07_0132	PF07_0132		PF07_0132	PF07_0132	PF07_0132	PF07_0132			PF07_0132		PF07_0132	PF07_0132	PF07_0132	PF07_0132		PF07_0132		PF07_0132	PF07_0132		PF07_0132	PF07_0132	PF07_0132	PF07_0132
MAL7P1.184	MAL7P1.184		MAL7P1.184	MAL7P1.184	MAL7P1.184				MAL7P1.184	MAL7P1.184	MAL7P1.184	MAL7P1.184	MAL7P1.184	MAL7P1.184	MAL7P1.184	MAL7P1.184	MAL7P1.184	MAL7P1.184	MAL7P1.184	MAL7P1.184	MAL7P1.184	MAL7P1.184	MAL7P1.184	MAL7P1.184
PF07_0134	PF07_0134	PF07_0134	PF07_0134	PF07_0134	PF07_0134				PF07_0134		PF07_0134	PF07_0134	PF07_0134	PF07_0134	PF07_0134	PF07_0134		PF07_0134	PF07_0134	PF07_0134	PF07_0134	PF07_0134	PF07_0134	PF07_0134
MAL7P1.185	MAL7P1.185	MAL7P1.185	MAL7P1.185	MAL7P1.185	MAL7P1.185	MAL7P1.185			MAL7P1.185		MAL7P1.185	MAL7P1.185	MAL7P1.185		MAL7P1.185	MAL7P1.185		MAL7P1.185	MAL7P1.185		MAL7P1.185	MAL7P1.185
MAL7P1.350	MAL7P1.350	MAL7P1.350	MAL7P1.350	MAL7P1.350	MAL7P1.350	MAL7P1.350			MAL7P1.350		MAL7P1.350	MAL7P1.350	MAL7P1.350		MAL7P1.350	MAL7P1.350		MAL7P1.350	MAL7P1.350		MAL7P1.350	MAL7P1.350	MAL7P1.350	MAL7P1.350
PF07_0136	PF07_0136	PF07_0136	PF07_0136	PF07_0136	PF07_0136	PF07_0136			PF07_0136		PF07_0136	PF07_0136	PF07_0136		PF07_0136	PF07_0136		PF07_0136	PF07_0136		PF07_0136	PF07_0136		PF07_0136
MAL7P1.186	MAL7P1.186		MAL7P1.186	MAL7P1.186	MAL7P1.186				MAL7P1.186		MAL7P1.186	MAL7P1.186	MAL7P1.186		MAL7P1.186			MAL7P1.186	MAL7P1.186		MAL7P1.186	MAL7P1.186		MAL7P1.186
PF07_0138	PF07_0138		PF07_0138	PF07_0138	PF07_0138				PF07_0138		PF07_0138	PF07_0138	PF07_0138		PF07_0138	PF07_0138		PF07_0138	PF07_0138		PF07_0138	PF07_0138
MAL7P1.187	MAL7P1.187	MAL7P1.187	MAL7P1.187	MAL7P1.187	MAL7P1.187	MAL7P1.187			MAL7P1.187	MAL7P1.187	MAL7P1.187	MAL7P1.187	MAL7P1.187		MAL7P1.187	MAL7P1.187	MAL7P1.187	MAL7P1.187	MAL7P1.187		MAL7P1.187	MAL7P1.187		MAL7P1.187
PF08_0142	PF08_0142	PF08_0142	PF08_0142	PF08_0142	PF08_0142				PF08_0142	PF08_0142	PF08_0142	PF08_0142	PF08_0142	PF08_0142	PF08_0142	PF08_0142	PF08_0142	PF08_0142	PF08_0142		PF08_0142	PF08_0142	PF08_0142	PF08_0142
PF08_0141	PF08_0141		PF08_0141		PF08_0141				PF08_0141		PF08_0141	PF08_0141	PF08_0141		PF08_0141	PF08_0141		PF08_0141	PF08_0141		PF08_0141	PF08_0141
PF08_0140	PF08_0140		PF08_0140		PF08_0140				PF08_0140		PF08_0140	PF08_0140	PF08_0140		PF08_0140	PF08_0140		PF08_0140	PF08_0140		PF08_0140	PF08_0140
PF08_0139	PF08_0139		PF08_0139		PF08_0139				PF08_0139	PF08_0139	PF08_0139	PF08_0139	PF08_0139		PF08_0139	PF08_0139		PF08_0139	PF08_0139		PF08_0139	PF08_0139		PF08_0139
PF08_0138	PF08_0138	PF08_0138	PF08_0138	PF08_0138	PF08_0138	PF08_0138			PF08_0138		PF08_0138	PF08_0138	PF08_0138		PF08_0138	PF08_0138		PF08_0138	PF08_0138	PF08_0138	PF08_0138	PF08_0138		PF08_0138
MAL8P1.163	MAL8P1.163		MAL8P1.163	MAL8P1.163	MAL8P1.163	MAL8P1.163			MAL8P1.163		MAL8P1.163	MAL8P1.163	MAL8P1.163		MAL8P1.163	MAL8P1.163		MAL8P1.163	MAL8P1.163		MAL8P1.163	MAL8P1.163		MAL8P1.163
MAL8P1.162	MAL8P1.162		MAL8P1.162	MAL8P1.162	MAL8P1.162	MAL8P1.162			MAL8P1.162	MAL8P1.162	MAL8P1.162	MAL8P1.162	MAL8P1.162	MAL8P1.162	MAL8P1.162	MAL8P1.162	MAL8P1.162	MAL8P1.162	MAL8P1.162		MAL8P1.162	MAL8P1.162	MAL8P1.162	MAL8P1.162
MAL8P1.161	MAL8P1.161		MAL8P1.161	MAL8P1.161	MAL8P1.161	MAL8P1.161			MAL8P1.161	MAL8P1.161	MAL8P1.161	MAL8P1.161	MAL8P1.161	MAL8P1.161	MAL8P1.161	MAL8P1.161	MAL8P1.161	MAL8P1.161	MAL8P1.161		MAL8P1.161	MAL8P1.161	MAL8P1.161	MAL8P1.161
MAL8P1.160	MAL8P1.160	MAL8P1.160	MAL8P1.160	MAL8P1.160	MAL8P1.160	MAL8P1.160			MAL8P1.160		MAL8P1.160	MAL8P1.160	MAL8P1.160		MAL8P1.160	MAL8P1.160		MAL8P1.160	MAL8P1.160		MAL8P1.160	MAL8P1.160		MAL8P1.160
PF08_0137	PF08_0137		PF08_0137	PF08_0137	PF08_0137	PF08_0137			PF08_0137		PF08_0137	PF08_0137	PF08_0137		PF08_0137	PF08_0137		PF08_0137	PF08_0137		PF08_0137	PF08_0137		PF08_0137
PF08_0136b	PF08_0136b		PF08_0136b	PF08_0136b	PF08_0136b	PF08_0136b			PF08_0136b		PF08_0136b	PF08_0136b	PF08_0136b		PF08_0136b	PF08_0136b		PF08_0136b	PF08_0136b	PF08_0136b	PF08_0136b	PF08_0136b		PF08_0136b
PF08_0136	PF08_0136	PF08_0136	PF08_0136	PF08_0136	PF08_0136	PF08_0136			PF08_0136	PF08_0136	PF08_0136	PF08_0136	PF08_0136	PF08_0136	PF08_0136	PF08_0136	PF08_0136	PF08_0136	PF08_0136		PF08_0136	PF08_0136	PF08_0136
PF08_0135	PF08_0135		PF08_0135		PF08_0135	PF08_0135			PF08_0135		PF08_0135	PF08_0135	PF08_0135		PF08_0135			PF08_0135	PF08_0135		PF08_0135	PF08_0135		PF08_0135
PF08_0134	PF08_0134		PF08_0134	PF08_0134	PF08_0134	PF08_0134			PF08_0134		PF08_0134	PF08_0134	PF08_0134	PF08_0134	PF08_0134	PF08_0134		PF08_0134	PF08_0134		PF08_0134	PF08_0134	PF08_0134	PF08_0134
MAL8P1.157	MAL8P1.157		MAL8P1.157	MAL8P1.157	MAL8P1.157	MAL8P1.157			MAL8P1.157		MAL8P1.157	MAL8P1.157	MAL8P1.157	MAL8P1.157	MAL8P1.157	MAL8P1.157		MAL8P1.157	MAL8P1.157		MAL8P1.157	MAL8P1.157	MAL8P1.157	MAL8P1.157
MAL8P1.156	MAL8P1.156		MAL8P1.156	MAL8P1.156	MAL8P1.156	MAL8P1.156	MAL8P1.156		MAL8P1.156	MAL8P1.156	MAL8P1.156	MAL8P1.156	MAL8P1.156	MAL8P1.156	MAL8P1.156	MAL8P1.156		MAL8P1.156	MAL8P1.156		MAL8P1.156	MAL8P1.156	MAL8P1.156	MAL8P1.156
MAL8P1.154	MAL8P1.154	MAL8P1.154	MAL8P1.154	MAL8P1.154	MAL8P1.154	MAL8P1.154			MAL8P1.154	MAL8P1.154	MAL8P1.154	MAL8P1.154		MAL8P1.154	MAL8P1.154	MAL8P1.154		MAL8P1.154	MAL8P1.154		MAL8P1.154	MAL8P1.154	MAL8P1.154	MAL8P1.154
PF08_0132	PF08_0132	PF08_0132	PF08_0132	PF08_0132	PF08_0132	PF08_0132			PF08_0132	PF08_0132	PF08_0132	PF08_0132	PF08_0132		PF08_0132	PF08_0132		PF08_0132	PF08_0132	PF08_0132	PF08_0132	PF08_0132		PF08_0132
MAL8P1.153	MAL8P1.153	MAL8P1.153	MAL8P1.153		MAL8P1.153	MAL8P1.153			MAL8P1.153		MAL8P1.153	MAL8P1.153	MAL8P1.153	MAL8P1.153	MAL8P1.153	MAL8P1.153		MAL8P1.153	MAL8P1.153		MAL8P1.153	MAL8P1.153	MAL8P1.153	MAL8P1.153
PF08_0131	PF08_0131		PF08_0131	PF08_0131	PF08_0131	PF08_0131	PF08_0131		PF08_0131		PF08_0131	PF08_0131	PF08_0131	PF08_0131	PF08_0131	PF08_0131		PF08_0131	PF08_0131		PF08_0131	PF08_0131	PF08_0131	PF08_0131
PF08_0130	PF08_0130		PF08_0130		PF08_0130				PF08_0130		PF08_0130	PF08_0130	PF08_0130		PF08_0130	PF08_0130		PF08_0130	PF08_0130		PF08_0130	PF08_0130		PF08_0130
MAL8P1.152	MAL8P1.152		MAL8P1.152		MAL8P1.152				MAL8P1.152		MAL8P1.152	MAL8P1.152	MAL8P1.152		MAL8P1.152	MAL8P1.152		MAL8P1.152	MAL8P1.152		MAL8P1.152	MAL8P1.152		MAL8P1.152
MAL8P1.151	MAL8P1.151		MAL8P1.151	MAL8P1.151	MAL8P1.151	MAL8P1.151	MAL8P1.151		MAL8P1.151	MAL8P1.151	MAL8P1.151	MAL8P1.151	MAL8P1.151	MAL8P1.151	MAL8P1.151	MAL8P1.151	MAL8P1.151	MAL8P1.151	MAL8P1.151		MAL8P1.151	MAL8P1.151	MAL8P1.151	MAL8P1.151
MAL8P1.150	MAL8P1.150		MAL8P1.150	MAL8P1.150	MAL8P1.150	MAL8P1.150	MAL8P1.150		MAL8P1.150	MAL8P1.150	MAL8P1.150	MAL8P1.150	MAL8P1.150	MAL8P1.150	MAL8P1.150	MAL8P1.150	MAL8P1.150	MAL8P1.150	MAL8P1.150		MAL8P1.150	MAL8P1.150	MAL8P1.150	MAL8P1.150
MAL8P1.149	MAL8P1.149		MAL8P1.149	MAL8P1.149	MAL8P1.149				MAL8P1.149	MAL8P1.149	MAL8P1.149	MAL8P1.149						MAL8P1.149	MAL8P1.149		MAL8P1.149	MAL8P1.149		MAL8P1.149
PF08_0129	PF08_0129	PF08_0129	PF08_0129		PF08_0129	PF08_0129			PF08_0129	PF08_0129	PF08_0129	PF08_0129	PF08_0129	PF08_0129	PF08_0129	PF08_0129	PF08_0129	PF08_0129	PF08_0129		PF08_0129	PF08_0129	PF08_0129	PF08_0129
MAL8P1.148	MAL8P1.148		MAL8P1.148		MAL8P1.148	MAL8P1.148			MAL8P1.148		MAL8P1.148	MAL8P1.148	MAL8P1.148			MAL8P1.148		MAL8P1.148	MAL8P1.148	MAL8P1.148	MAL8P1.148	MAL8P1.148		MAL8P1.148
PF08_0128	PF08_0128		PF08_0128		PF08_0128	PF08_0128			PF08_0128		PF08_0128	PF08_0128	PF08_0128		PF08_0128	PF08_0128		PF08_0128	PF08_0128	PF08_0128	PF08_0128	PF08_0128		PF08_0128
PF08_0127	PF08_0127		PF08_0127	PF08_0127	PF08_0127	PF08_0127			PF08_0127		PF08_0127	PF08_0127	PF08_0127		PF08_0127	PF08_0127		PF08_0127	PF08_0127		PF08_0127	PF08_0127	PF08_0127
MAL8P1.146	MAL8P1.146	MAL8P1.146	MAL8P1.146	MAL8P1.146	MAL8P1.146	MAL8P1.146			MAL8P1.146	MAL8P1.146	MAL8P1.146	MAL8P1.146	MAL8P1.146	MAL8P1.146	MAL8P1.146	MAL8P1.146		MAL8P1.146	MAL8P1.146		MAL8P1.146	MAL8P1.146	MAL8P1.146	MAL8P1.146
MAL8P1.145	MAL8P1.145	MAL8P1.145	MAL8P1.145	MAL8P1.145	MAL8P1.145	MAL8P1.145			MAL8P1.145	MAL8P1.145	MAL8P1.145	MAL8P1.145	MAL8P1.145	MAL8P1.145	MAL8P1.145	MAL8P1.145		MAL8P1.145	MAL8P1.145		MAL8P1.145	MAL8P1.145	MAL8P1.145	MAL8P1.145
PF08_0126	PF08_0126		PF08_0126	PF08_0126	PF08_0126	PF08_0126			PF08_0126		PF08_0126	PF08_0126	PF08_0126	PF08_0126	PF08_0126			PF08_0126	PF08_0126	PF08_0126	PF08_0126	PF08_0126	PF08_0126	PF08_0126
MAL8P1.144	MAL8P1.144	MAL8P1.144	MAL8P1.144	MAL8P1.144	MAL8P1.144	MAL8P1.144	MAL8P1.144		MAL8P1.144	MAL8P1.144	MAL8P1.144	MAL8P1.144	MAL8P1.144	MAL8P1.144	MAL8P1.144	MAL8P1.144	MAL8P1.144	MAL8P1.144	MAL8P1.144		MAL8P1.144	MAL8P1.144	MAL8P1.144	MAL8P1.144
MAL8P1.143	MAL8P1.143		MAL8P1.143		MAL8P1.143		MAL8P1.143		MAL8P1.143	MAL8P1.143	MAL8P1.143	MAL8P1.143	MAL8P1.143	MAL8P1.143	MAL8P1.143	MAL8P1.143		MAL8P1.143	MAL8P1.143		MAL8P1.143	MAL8P1.143	MAL8P1.143	MAL8P1.143
PF08_0125	PF08_0125		PF08_0125		PF08_0125	PF08_0125			PF08_0125	PF08_0125	PF08_0125	PF08_0125	PF08_0125	PF08_0125	PF08_0125			PF08_0125	PF08_0125		PF08_0125	PF08_0125	PF08_0125	PF08_0125
MAL8P1.142	MAL8P1.142		MAL8P1.142	MAL8P1.142	MAL8P1.142	MAL8P1.142			MAL8P1.142	MAL8P1.142	MAL8P1.142	MAL8P1.142	MAL8P1.142		MAL8P1.142	MAL8P1.142		MAL8P1.142	MAL8P1.142		MAL8P1.142	MAL8P1.142		MAL8P1.142
PF08_0124	PF08_0124		PF08_0124	PF08_0124	PF08_0124	PF08_0124			PF08_0124	PF08_0124	PF08_0124	PF08_0124	PF08_0124		PF08_0124	PF08_0124	PF08_0124	PF08_0124	PF08_0124		PF08_0124	PF08_0124
MAL8P1.141	MAL8P1.141		MAL8P1.141		MAL8P1.141						MAL8P1.141	MAL8P1.141	MAL8P1.141		MAL8P1.141	MAL8P1.141		MAL8P1.141	MAL8P1.141		MAL8P1.141
MAL8P1.140	MAL8P1.140		MAL8P1.140		MAL8P1.140	MAL8P1.140			MAL8P1.140		MAL8P1.140	MAL8P1.140	MAL8P1.140					MAL8P1.140	MAL8P1.140		MAL8P1.140			MAL8P1.140
MAL8P1.139	MAL8P1.139	MAL8P1.139	MAL8P1.139	MAL8P1.139	MAL8P1.139	MAL8P1.139			MAL8P1.139		MAL8P1.139	MAL8P1.139	MAL8P1.139	MAL8P1.139	MAL8P1.139	MAL8P1.139		MAL8P1.139	MAL8P1.139		MAL8P1.139	MAL8P1.139	MAL8P1.139	MAL8P1.139
PF08_0123	PF08_0123		PF08_0123		PF08_0123	PF08_0123			PF08_0123	PF08_0123	PF08_0123	PF08_0123	PF08_0123		PF08_0123				PF08_0123			PF08_0123		PF08_0123
PF08_0122	PF08_0122	PF08_0122	PF08_0122		PF08_0122	PF08_0122			PF08_0122		PF08_0122	PF08_0122	PF08_0122	PF08_0122	PF08_0122	PF08_0122		PF08_0122	PF08_0122		PF08_0122	PF08_0122	PF08_0122	PF08_0122
PF08_0121	PF08_0121	PF08_0121	PF08_0121		PF08_0121				PF08_0121		PF08_0121	PF08_0121	PF08_0121		PF08_0121	PF08_0121		PF08_0121	PF08_0121		PF08_0121	PF08_0121		PF08_0121
PF08_0120	PF08_0120	PF08_0120	PF08_0120	PF08_0120	PF08_0120	PF08_0120			PF08_0120		PF08_0120	PF08_0120	PF08_0120	PF08_0120	PF08_0120			PF08_0120	PF08_0120	PF08_0120	PF08_0120	PF08_0120	PF08_0120	PF08_0120
MAL8P1.138	MAL8P1.138		MAL8P1.138	MAL8P1.138	MAL8P1.138	MAL8P1.138			MAL8P1.138		MAL8P1.138	MAL8P1.138	MAL8P1.138	MAL8P1.138	MAL8P1.138			MAL8P1.138	MAL8P1.138		MAL8P1.138	MAL8P1.138	MAL8P1.138	MAL8P1.138
MAL8P1.137	MAL8P1.137		MAL8P1.137	MAL8P1.137	MAL8P1.137	MAL8P1.137			MAL8P1.137	MAL8P1.137	MAL8P1.137	MAL8P1.137	MAL8P1.137	MAL8P1.137	MAL8P1.137	MAL8P1.137		MAL8P1.137	MAL8P1.137		MAL8P1.137	MAL8P1.137	MAL8P1.137	MAL8P1.137
PF08_0119	PF08_0119	PF08_0119	PF08_0119	PF08_0119	PF08_0119	PF08_0119			PF08_0119	PF08_0119	PF08_0119	PF08_0119	PF08_0119		PF08_0119	PF08_0119		PF08_0119	PF08_0119	PF08_0119	PF08_0119	PF08_0119		PF08_0119
PF08_0118	PF08_0118	PF08_0118	PF08_0118	PF08_0118	PF08_0118	PF08_0118			PF08_0118		PF08_0118	PF08_0118	PF08_0118	PF08_0118	PF08_0118	PF08_0118		PF08_0118	PF08_0118		PF08_0118	PF08_0118	PF08_0118	PF08_0118
MAL8P1.200	MAL8P1.200		MAL8P1.200		MAL8P1.200	MAL8P1.200					MAL8P1.200	MAL8P1.200	MAL8P1.200	MAL8P1.200					MAL8P1.200				MAL8P1.200
MAL8P1.201	MAL8P1.201	MAL8P1.201	MAL8P1.201	MAL8P1.201	MAL8P1.201	MAL8P1.201			MAL8P1.201		MAL8P1.201	MAL8P1.201	MAL8P1.201		MAL8P1.201	MAL8P1.201		MAL8P1.201	MAL8P1.201		MAL8P1.201	MAL8P1.201		MAL8P1.201
MAL8P1.202	MAL8P1.202	MAL8P1.202	MAL8P1.202	MAL8P1.202	MAL8P1.202	MAL8P1.202			MAL8P1.202	MAL8P1.202	MAL8P1.202	MAL8P1.202		MAL8P1.202	MAL8P1.202	MAL8P1.202		MAL8P1.202	MAL8P1.202		MAL8P1.202	MAL8P1.202	MAL8P1.202	MAL8P1.202
MAL8P1.203	MAL8P1.203	MAL8P1.203	MAL8P1.203	MAL8P1.203	MAL8P1.203	MAL8P1.203			MAL8P1.203		MAL8P1.203	MAL8P1.203	MAL8P1.203		MAL8P1.203	MAL8P1.203		MAL8P1.203	MAL8P1.203		MAL8P1.203	MAL8P1.203		MAL8P1.203
MAL8P1.136	MAL8P1.136		MAL8P1.136		MAL8P1.136				MAL8P1.136		MAL8P1.136	MAL8P1.136	MAL8P1.136		MAL8P1.136	MAL8P1.136			MAL8P1.136	MAL8P1.136				MAL8P1.136
PF08_0117	PF08_0117		PF08_0117		PF08_0117	PF08_0117					PF08_0117	PF08_0117			PF08_0117			PF08_0117			PF08_0117			PF08_0117
PF08_0116	PF08_0116		PF08_0116		PF08_0116	PF08_0116					PF08_0116	PF08_0116			PF08_0116			PF08_0116			PF08_0116			PF08_0116
MAL8P1.135	MAL8P1.135	MAL8P1.135	MAL8P1.135		MAL8P1.135	MAL8P1.135			MAL8P1.135	MAL8P1.135	MAL8P1.135	MAL8P1.135	MAL8P1.135		MAL8P1.135	MAL8P1.135		MAL8P1.135	MAL8P1.135		MAL8P1.135	MAL8P1.135		MAL8P1.135
MAL8P1.134	MAL8P1.134	MAL8P1.134	MAL8P1.134		MAL8P1.134	MAL8P1.134			MAL8P1.134	MAL8P1.134	MAL8P1.134	MAL8P1.134	MAL8P1.134	MAL8P1.134	MAL8P1.134	MAL8P1.134		MAL8P1.134	MAL8P1.134		MAL8P1.134	MAL8P1.134	MAL8P1.134	MAL8P1.134
MAL8P1.133	MAL8P1.133	MAL8P1.133	MAL8P1.133		MAL8P1.133	MAL8P1.133			MAL8P1.133	MAL8P1.133	MAL8P1.133	MAL8P1.133	MAL8P1.133		MAL8P1.133	MAL8P1.133		MAL8P1.133	MAL8P1.133		MAL8P1.133	MAL8P1.133		MAL8P1.133
PF08_0115	PF08_0115	PF08_0115	PF08_0115	PF08_0115	PF08_0115	PF08_0115			PF08_0115		PF08_0115	PF08_0115	PF08_0115	PF08_0115	PF08_0115	PF08_0115		PF08_0115	PF08_0115		PF08_0115	PF08_0115	PF08_0115	PF08_0115
MAL8P1.132	MAL8P1.132		MAL8P1.132		MAL8P1.132	MAL8P1.132			MAL8P1.132		MAL8P1.132	MAL8P1.132	MAL8P1.132		MAL8P1.132	MAL8P1.132		MAL8P1.132	MAL8P1.132		MAL8P1.132	MAL8P1.132
PF08_0114	PF08_0114		PF08_0114		PF08_0114	PF08_0114			PF08_0114		PF08_0114	PF08_0114	PF08_0114		PF08_0114	PF08_0114		PF08_0114	PF08_0114		PF08_0114	PF08_0114
PF08_0113	PF08_0113	PF08_0113	PF08_0113	PF08_0113	PF08_0113	PF08_0113			PF08_0113	PF08_0113	PF08_0113	PF08_0113	PF08_0113		PF08_0113	PF08_0113	PF08_0113	PF08_0113	PF08_0113	PF08_0113	PF08_0113	PF08_0113		PF08_0113
PF08_0112	PF08_0112		PF08_0112	PF08_0112	PF08_0112	PF08_0112	PF08_0112		PF08_0112		PF08_0112	PF08_0112	PF08_0112		PF08_0112	PF08_0112		PF08_0112	PF08_0112	PF08_0112	PF08_0112	PF08_0112		PF08_0112
MAL8P1.131	MAL8P1.131		MAL8P1.131	MAL8P1.131	MAL8P1.131	MAL8P1.131	MAL8P1.131		MAL8P1.131		MAL8P1.131	MAL8P1.131	MAL8P1.131		MAL8P1.131	MAL8P1.131		MAL8P1.131	MAL8P1.131	MAL8P1.131	MAL8P1.131	MAL8P1.131		MAL8P1.131
PF08_0111	PF08_0111		PF08_0111	PF08_0111	PF08_0111	PF08_0111			PF08_0111		PF08_0111	PF08_0111				PF08_0111		PF08_0111	PF08_0111		PF08_0111	PF08_0111		PF08_0111
MAL8P1.130	MAL8P1.130		MAL8P1.130	MAL8P1.130	MAL8P1.130	MAL8P1.130			MAL8P1.130		MAL8P1.130	MAL8P1.130				MAL8P1.130		MAL8P1.130	MAL8P1.130		MAL8P1.130	MAL8P1.130		MAL8P1.130
PF08_0110	PF08_0110		PF08_0110		PF08_0110				PF08_0110		PF08_0110	PF08_0110	PF08_0110	PF08_0110				PF08_0110	PF08_0110		PF08_0110	PF08_0110	PF08_0110	PF08_0110
MAL8P1.300	MAL8P1.300	MAL8P1.300	MAL8P1.300	MAL8P1.300	MAL8P1.300	MAL8P1.300			MAL8P1.300	MAL8P1.300	MAL8P1.300	MAL8P1.300	MAL8P1.300		MAL8P1.300	MAL8P1.300	MAL8P1.300	MAL8P1.300	MAL8P1.300		MAL8P1.300	MAL8P1.300		MAL8P1.300
MAL8P1.128	MAL8P1.128		MAL8P1.128		MAL8P1.128	MAL8P1.128			MAL8P1.128		MAL8P1.128	MAL8P1.128			MAL8P1.128	MAL8P1.128		MAL8P1.128	MAL8P1.128		MAL8P1.128	MAL8P1.128
MAL8P1.127	MAL8P1.127	MAL8P1.127	MAL8P1.127	MAL8P1.127	MAL8P1.127	MAL8P1.127	MAL8P1.127		MAL8P1.127		MAL8P1.127	MAL8P1.127			MAL8P1.127	MAL8P1.127		MAL8P1.127	MAL8P1.127	MAL8P1.127	MAL8P1.127	MAL8P1.127		MAL8P1.127
MAL8P1.126	MAL8P1.126		MAL8P1.126		MAL8P1.126	MAL8P1.126			MAL8P1.126	MAL8P1.126	MAL8P1.126	MAL8P1.126		MAL8P1.126	MAL8P1.126		MAL8P1.126	MAL8P1.126	MAL8P1.126		MAL8P1.126		MAL8P1.126	MAL8P1.126
PF08_0109	PF08_0109		PF08_0109	PF08_0109	PF08_0109	PF08_0109			PF08_0109		PF08_0109	PF08_0109	PF08_0109	PF08_0109	PF08_0109			PF08_0109	PF08_0109		PF08_0109	PF08_0109	PF08_0109	PF08_0109
MAL8P1.125	MAL8P1.125		MAL8P1.125	MAL8P1.125	MAL8P1.125	MAL8P1.125			MAL8P1.125		MAL8P1.125	MAL8P1.125	MAL8P1.125	MAL8P1.125	MAL8P1.125			MAL8P1.125	MAL8P1.125		MAL8P1.125	MAL8P1.125	MAL8P1.125	MAL8P1.125
MAL8P1.124	MAL8P1.124		MAL8P1.124		MAL8P1.124	MAL8P1.124	MAL8P1.124		MAL8P1.124		MAL8P1.124	MAL8P1.124	MAL8P1.124	MAL8P1.124	MAL8P1.124	MAL8P1.124		MAL8P1.124	MAL8P1.124		MAL8P1.124	MAL8P1.124	MAL8P1.124	MAL8P1.124
MAL8P1.123	MAL8P1.123		MAL8P1.123	MAL8P1.123	MAL8P1.123	MAL8P1.123			MAL8P1.123		MAL8P1.123	MAL8P1.123	MAL8P1.123		MAL8P1.123			MAL8P1.123	MAL8P1.123		MAL8P1.123	MAL8P1.123
PF08_0108	PF08_0108		PF08_0108	PF08_0108	PF08_0108	PF08_0108		PF08_0108	PF08_0108		PF08_0108	PF08_0108	PF08_0108		PF08_0108	PF08_0108		PF08_0108	PF08_0108	PF08_0108	PF08_0108	PF08_0108		PF08_0108
MAL8P1.122	MAL8P1.122	MAL8P1.122	MAL8P1.122		MAL8P1.122	MAL8P1.122			MAL8P1.122		MAL8P1.122	MAL8P1.122	MAL8P1.122		MAL8P1.122	MAL8P1.122		MAL8P1.122	MAL8P1.122	MAL8P1.122	MAL8P1.122	MAL8P1.122		MAL8P1.122
MAL8P1.121	MAL8P1.121		MAL8P1.121		MAL8P1.121					MAL8P1.121	MAL8P1.121	MAL8P1.121			MAL8P1.121		MAL8P1.121	MAL8P1.121	MAL8P1.121		MAL8P1.121	MAL8P1.121		MAL8P1.121
PF08_0107	PF08_0107	PF08_0107	PF08_0107	PF08_0107	PF08_0107	PF08_0107			PF08_0107	PF08_0107	PF08_0107	PF08_0107	PF08_0107	PF08_0107	PF08_0107	PF08_0107		PF08_0107	PF08_0107	PF08_0107	PF08_0107	PF08_0107	PF08_0107	PF08_0107
PF08_0106	PF08_0106	PF08_0106	PF08_0106	PF08_0106	PF08_0106				PF08_0106	PF08_0106	PF08_0106	PF08_0106	PF08_0106	PF08_0106	PF08_0106	PF08_0106		PF08_0106	PF08_0106		PF08_0106	PF08_0106	PF08_0106	PF08_0106
PF08_0105	PF08_0105	PF08_0105	PF08_0105	PF08_0105	PF08_0105				PF08_0105		PF08_0105	PF08_0105	PF08_0105	PF08_0105	PF08_0105	PF08_0105		PF08_0105	PF08_0105		PF08_0105	PF08_0105	PF08_0105	PF08_0105
PF08_0104	PF08_0104		PF08_0104	PF08_0104	PF08_0104	PF08_0104			PF08_0104		PF08_0104	PF08_0104	PF08_0104	PF08_0104	PF08_0104	PF08_0104		PF08_0104	PF08_0104		PF08_0104	PF08_0104	PF08_0104
PF08_0103	PF08_0103	PF08_0103	PF08_0103	PF08_0103	PF08_0103	PF08_0103			PF08_0103	PF08_0103	PF08_0103	PF08_0103	PF08_0103		PF08_0103	PF08_0103		PF08_0103	PF08_0103		PF08_0103	PF08_0103		PF08_0103
PF08_0102	PF08_0102		PF08_0102		PF08_0102	PF08_0102			PF08_0102		PF08_0102	PF08_0102	PF08_0102		PF08_0102	PF08_0102		PF08_0102	PF08_0102		PF08_0102	PF08_0102		PF08_0102
PF08_0101	PF08_0101		PF08_0101		PF08_0101	PF08_0101			PF08_0101	PF08_0101	PF08_0101	PF08_0101	PF08_0101	PF08_0101	PF08_0101	PF08_0101		PF08_0101	PF08_0101		PF08_0101	PF08_0101	PF08_0101	PF08_0101
MAL8P1.114	MAL8P1.114		MAL8P1.114	MAL8P1.114	MAL8P1.114	MAL8P1.114			MAL8P1.114		MAL8P1.114	MAL8P1.114	MAL8P1.114		MAL8P1.114			MAL8P1.114	MAL8P1.114		MAL8P1.114	MAL8P1.114		MAL8P1.114
MAL8P1.113	MAL8P1.113		MAL8P1.113	MAL8P1.113	MAL8P1.113	MAL8P1.113	MAL8P1.113		MAL8P1.113		MAL8P1.113	MAL8P1.113	MAL8P1.113	MAL8P1.113	MAL8P1.113	MAL8P1.113		MAL8P1.113	MAL8P1.113		MAL8P1.113	MAL8P1.113	MAL8P1.113	MAL8P1.113
PF08_0100	PF08_0100		PF08_0100		PF08_0100				PF08_0100	PF08_0100	PF08_0100	PF08_0100	PF08_0100	PF08_0100	PF08_0100	PF08_0100		PF08_0100	PF08_0100		PF08_0100	PF08_0100	PF08_0100
MAL8P1.112	MAL8P1.112	MAL8P1.112	MAL8P1.112		MAL8P1.112	MAL8P1.112			MAL8P1.112		MAL8P1.112	MAL8P1.112	MAL8P1.112	MAL8P1.112	MAL8P1.112	MAL8P1.112		MAL8P1.112	MAL8P1.112		MAL8P1.112		MAL8P1.112	MAL8P1.112
MAL8P1.111	MAL8P1.111		MAL8P1.111	MAL8P1.111	MAL8P1.111	MAL8P1.111			MAL8P1.111	MAL8P1.111	MAL8P1.111	MAL8P1.111	MAL8P1.111		MAL8P1.111			MAL8P1.111	MAL8P1.111	MAL8P1.111	MAL8P1.111	MAL8P1.111		MAL8P1.111
PF08_0099	PF08_0099		PF08_0099	PF08_0099	PF08_0099	PF08_0099			PF08_0099	PF08_0099	PF08_0099	PF08_0099	PF08_0099	PF08_0099	PF08_0099			PF08_0099	PF08_0099		PF08_0099	PF08_0099	PF08_0099
MAL8P1.110	MAL8P1.110		MAL8P1.110		MAL8P1.110	MAL8P1.110			MAL8P1.110		MAL8P1.110	MAL8P1.110			MAL8P1.110	MAL8P1.110		MAL8P1.110	MAL8P1.110		MAL8P1.110	MAL8P1.110		MAL8P1.110
PF08_0098	PF08_0098		PF08_0098	PF08_0098	PF08_0098	PF08_0098			PF08_0098		PF08_0098	PF08_0098			PF08_0098	PF08_0098		PF08_0098	PF08_0098		PF08_0098	PF08_0098		PF08_0098
MAL8P1.109	MAL8P1.109	MAL8P1.109	MAL8P1.109	MAL8P1.109	MAL8P1.109	MAL8P1.109			MAL8P1.109	MAL8P1.109	MAL8P1.109	MAL8P1.109	MAL8P1.109	MAL8P1.109	MAL8P1.109	MAL8P1.109		MAL8P1.109	MAL8P1.109		MAL8P1.109	MAL8P1.109	MAL8P1.109	MAL8P1.109
PF08_0097	PF08_0097		PF08_0097	PF08_0097	PF08_0097	PF08_0097	PF08_0097		PF08_0097		PF08_0097	PF08_0097	PF08_0097		PF08_0097	PF08_0097		PF08_0097			PF08_0097	PF08_0097		PF08_0097
MAL8P1.108	MAL8P1.108		MAL8P1.108	MAL8P1.108	MAL8P1.108	MAL8P1.108			MAL8P1.108	MAL8P1.108	MAL8P1.108	MAL8P1.108	MAL8P1.108	MAL8P1.108	MAL8P1.108	MAL8P1.108	MAL8P1.108	MAL8P1.108	MAL8P1.108		MAL8P1.108	MAL8P1.108	MAL8P1.108	MAL8P1.108
PF08_0096	PF08_0096		PF08_0096	PF08_0096	PF08_0096	PF08_0096			PF08_0096		PF08_0096	PF08_0096	PF08_0096	PF08_0096	PF08_0096	PF08_0096		PF08_0096	PF08_0096	PF08_0096	PF08_0096	PF08_0096	PF08_0096	PF08_0096
MAL8P1.107	MAL8P1.107		MAL8P1.107		MAL8P1.107				MAL8P1.107		MAL8P1.107	MAL8P1.107	MAL8P1.107		MAL8P1.107	MAL8P1.107		MAL8P1.107	MAL8P1.107		MAL8P1.107	MAL8P1.107
PF08_0095	PF08_0095		PF08_0095		PF08_0095				PF08_0095		PF08_0095	PF08_0095	PF08_0095		PF08_0095	PF08_0095		PF08_0095	PF08_0095		PF08_0095	PF08_0095
MAL8P1.106	MAL8P1.106		MAL8P1.106		MAL8P1.106	MAL8P1.106			MAL8P1.106	MAL8P1.106	MAL8P1.106	MAL8P1.106	MAL8P1.106	MAL8P1.106	MAL8P1.106		MAL8P1.106	MAL8P1.106	MAL8P1.106		MAL8P1.106	MAL8P1.106	MAL8P1.106	MAL8P1.106
PF08_0094	PF08_0094		PF08_0094		PF08_0094	PF08_0094			PF08_0094	PF08_0094	PF08_0094	PF08_0094	PF08_0094	PF08_0094	PF08_0094		PF08_0094	PF08_0094	PF08_0094		PF08_0094	PF08_0094	PF08_0094	PF08_0094
PF08_0093	PF08_0093		PF08_0093	PF08_0093	PF08_0093	PF08_0093			PF08_0093	PF08_0093	PF08_0093	PF08_0093	PF08_0093	PF08_0093	PF08_0093	PF08_0093	PF08_0093	PF08_0093	PF08_0093		PF08_0093	PF08_0093	PF08_0093	PF08_0093
MAL8P1.105	MAL8P1.105		MAL8P1.105	MAL8P1.105	MAL8P1.105	MAL8P1.105			MAL8P1.105	MAL8P1.105	MAL8P1.105	MAL8P1.105	MAL8P1.105	MAL8P1.105	MAL8P1.105	MAL8P1.105	MAL8P1.105	MAL8P1.105	MAL8P1.105		MAL8P1.105	MAL8P1.105	MAL8P1.105	MAL8P1.105
MAL8P1.104	MAL8P1.104		MAL8P1.104	MAL8P1.104	MAL8P1.104	MAL8P1.104			MAL8P1.104	MAL8P1.104	MAL8P1.104	MAL8P1.104	MAL8P1.104			MAL8P1.104	MAL8P1.104	MAL8P1.104	MAL8P1.104		MAL8P1.104	MAL8P1.104	MAL8P1.104	MAL8P1.104
MAL8P1.103	MAL8P1.103	MAL8P1.103	MAL8P1.103		MAL8P1.103	MAL8P1.103			MAL8P1.103		MAL8P1.103	MAL8P1.103	MAL8P1.103		MAL8P1.103			MAL8P1.103	MAL8P1.103		MAL8P1.103	MAL8P1.103	MAL8P1.103	MAL8P1.103
PF08_0092	PF08_0092		PF08_0092		PF08_0092	PF08_0092			PF08_0092		PF08_0092	PF08_0092	PF08_0092			PF08_0092		PF08_0092	PF08_0092		PF08_0092	PF08_0092
PF08_0091	PF08_0091	PF08_0091	PF08_0091	PF08_0091	PF08_0091	PF08_0091			PF08_0091	PF08_0091	PF08_0091	PF08_0091	PF08_0091	PF08_0091	PF08_0091	PF08_0091		PF08_0091	PF08_0091		PF08_0091	PF08_0091	PF08_0091	PF08_0091
PF08_0090	PF08_0090		PF08_0090	PF08_0090	PF08_0090	PF08_0090			PF08_0090	PF08_0090	PF08_0090	PF08_0090	PF08_0090	PF08_0090	PF08_0090	PF08_0090	PF08_0090	PF08_0090	PF08_0090		PF08_0090	PF08_0090	PF08_0090	PF08_0090
MAL8P1.102	MAL8P1.102		MAL8P1.102	MAL8P1.102	MAL8P1.102	MAL8P1.102					MAL8P1.102	MAL8P1.102	MAL8P1.102		MAL8P1.102			MAL8P1.102	MAL8P1.102		MAL8P1.102	MAL8P1.102		MAL8P1.102
MAL8P1.101	MAL8P1.101		MAL8P1.101	MAL8P1.101	MAL8P1.101	MAL8P1.101					MAL8P1.101	MAL8P1.101	MAL8P1.101		MAL8P1.101			MAL8P1.101	MAL8P1.101		MAL8P1.101	MAL8P1.101		MAL8P1.101
MAL8P1.100	MAL8P1.100		MAL8P1.100		MAL8P1.100	MAL8P1.100			MAL8P1.100		MAL8P1.100	MAL8P1.100	MAL8P1.100		MAL8P1.100	MAL8P1.100		MAL8P1.100	MAL8P1.100	MAL8P1.100	MAL8P1.100	MAL8P1.100		MAL8P1.100
PF08_0089	PF08_0089		PF08_0089		PF08_0089	PF08_0089			PF08_0089		PF08_0089	PF08_0089	PF08_0089		PF08_0089	PF08_0089		PF08_0089	PF08_0089		PF08_0089	PF08_0089		PF08_0089
MAL8P1.99	MAL8P1.99		MAL8P1.99		MAL8P1.99				MAL8P1.99		MAL8P1.99	MAL8P1.99	MAL8P1.99		MAL8P1.99			MAL8P1.99	MAL8P1.99		MAL8P1.99	MAL8P1.99		MAL8P1.99
PF08_0088	PF08_0088	PF08_0088	PF08_0088	PF08_0088	PF08_0088	PF08_0088			PF08_0088		PF08_0088	PF08_0088	PF08_0088	PF08_0088	PF08_0088	PF08_0088		PF08_0088	PF08_0088		PF08_0088	PF08_0088	PF08_0088	PF08_0088
PF08_0087	PF08_0087		PF08_0087		PF08_0087	PF08_0087				PF08_0087	PF08_0087	PF08_0087	PF08_0087		PF08_0087	PF08_0087		PF08_0087	PF08_0087		PF08_0087	PF08_0087		PF08_0087
PF08_0086	PF08_0086		PF08_0086	PF08_0086	PF08_0086	PF08_0086			PF08_0086		PF08_0086	PF08_0086	PF08_0086		PF08_0086	PF08_0086		PF08_0086	PF08_0086		PF08_0086	PF08_0086		PF08_0086
PF08_0085	PF08_0085	PF08_0085	PF08_0085	PF08_0085	PF08_0085	PF08_0085			PF08_0085		PF08_0085	PF08_0085	PF08_0085		PF08_0085	PF08_0085		PF08_0085	PF08_0085	PF08_0085	PF08_0085	PF08_0085		PF08_0085
PF08_0084	PF08_0084	PF08_0084	PF08_0084	PF08_0084	PF08_0084	PF08_0084			PF08_0084		PF08_0084	PF08_0084	PF08_0084		PF08_0084	PF08_0084		PF08_0084	PF08_0084	PF08_0084	PF08_0084	PF08_0084		PF08_0084
MAL8P1.380	MAL8P1.380		MAL8P1.380	MAL8P1.380	MAL8P1.380				MAL8P1.380		MAL8P1.380	MAL8P1.380				MAL8P1.380		MAL8P1.380	MAL8P1.380		MAL8P1.380	MAL8P1.380
MAL8P1.97	MAL8P1.97		MAL8P1.97		MAL8P1.97	MAL8P1.97			MAL8P1.97		MAL8P1.97	MAL8P1.97	MAL8P1.97	MAL8P1.97	MAL8P1.97	MAL8P1.97		MAL8P1.97	MAL8P1.97		MAL8P1.97	MAL8P1.97	MAL8P1.97	MAL8P1.97
PF08_0083	PF08_0083	PF08_0083	PF08_0083	PF08_0083	PF08_0083	PF08_0083			PF08_0083		PF08_0083	PF08_0083	PF08_0083	PF08_0083	PF08_0083	PF08_0083		PF08_0083	PF08_0083		PF08_0083	PF08_0083	PF08_0083	PF08_0083
PF08_0082	PF08_0082	PF08_0082	PF08_0082	PF08_0082	PF08_0082	PF08_0082	PF08_0082		PF08_0082	PF08_0082	PF08_0082	PF08_0082	PF08_0082	PF08_0082	PF08_0082	PF08_0082	PF08_0082	PF08_0082	PF08_0082		PF08_0082	PF08_0082	PF08_0082	PF08_0082
MAL8P1.96	MAL8P1.96	MAL8P1.96	MAL8P1.96	MAL8P1.96	MAL8P1.96	MAL8P1.96			MAL8P1.96	MAL8P1.96	MAL8P1.96	MAL8P1.96	MAL8P1.96		MAL8P1.96	MAL8P1.96		MAL8P1.96	MAL8P1.96		MAL8P1.96	MAL8P1.96		MAL8P1.96
MAL8P1.95	MAL8P1.95	MAL8P1.95	MAL8P1.95	MAL8P1.95	MAL8P1.95	MAL8P1.95			MAL8P1.95	MAL8P1.95	MAL8P1.95	MAL8P1.95	MAL8P1.95		MAL8P1.95	MAL8P1.95		MAL8P1.95	MAL8P1.95		MAL8P1.95	MAL8P1.95		MAL8P1.95
PF08_0081	PF08_0081		PF08_0081		PF08_0081	PF08_0081			PF08_0081		PF08_0081	PF08_0081	PF08_0081		PF08_0081	PF08_0081		PF08_0081	PF08_0081		PF08_0081	PF08_0081
PF08_0080	PF08_0080	PF08_0080	PF08_0080		PF08_0080	PF08_0080			PF08_0080		PF08_0080	PF08_0080	PF08_0080		PF08_0080	PF08_0080		PF08_0080	PF08_0080		PF08_0080	PF08_0080		PF08_0080
PF08_0079	PF08_0079	PF08_0079	PF08_0079		PF08_0079	PF08_0079			PF08_0079		PF08_0079	PF08_0079	PF08_0079		PF08_0079	PF08_0079		PF08_0079	PF08_0079		PF08_0079	PF08_0079		PF08_0079
PF08_0078	PF08_0078		PF08_0078	PF08_0078	PF08_0078	PF08_0078			PF08_0078	PF08_0078	PF08_0078	PF08_0078	PF08_0078	PF08_0078	PF08_0078	PF08_0078	PF08_0078	PF08_0078	PF08_0078	PF08_0078	PF08_0078		PF08_0078	PF08_0078
PF08_0077	PF08_0077		PF08_0077	PF08_0077	PF08_0077	PF08_0077			PF08_0077	PF08_0077	PF08_0077	PF08_0077	PF08_0077	PF08_0077	PF08_0077	PF08_0077	PF08_0077	PF08_0077	PF08_0077	PF08_0077	PF08_0077		PF08_0077	PF08_0077
PF08_0076	PF08_0076		PF08_0076	PF08_0076	PF08_0076	PF08_0076	PF08_0076		PF08_0076		PF08_0076	PF08_0076	PF08_0076		PF08_0076	PF08_0076		PF08_0076	PF08_0076		PF08_0076	PF08_0076		PF08_0076
PF08_0075	PF08_0075		PF08_0075	PF08_0075	PF08_0075	PF08_0075	PF08_0075		PF08_0075	PF08_0075	PF08_0075	PF08_0075	PF08_0075		PF08_0075	PF08_0075		PF08_0075	PF08_0075		PF08_0075	PF08_0075		PF08_0075
MAL8P1.93	MAL8P1.93	MAL8P1.93	MAL8P1.93	MAL8P1.93	MAL8P1.93	MAL8P1.93			MAL8P1.93	MAL8P1.93	MAL8P1.93	MAL8P1.93	MAL8P1.93		MAL8P1.93	MAL8P1.93		MAL8P1.93	MAL8P1.93		MAL8P1.93	MAL8P1.93		MAL8P1.93
PF08_0074	PF08_0074		PF08_0074		PF08_0074	PF08_0074			PF08_0074		PF08_0074	PF08_0074	PF08_0074		PF08_0074	PF08_0074		PF08_0074	PF08_0074	PF08_0074	PF08_0074	PF08_0074		PF08_0074
MAL8P1.92	MAL8P1.92		MAL8P1.92		MAL8P1.92						MAL8P1.92	MAL8P1.92	MAL8P1.92		MAL8P1.92	MAL8P1.92		MAL8P1.92	MAL8P1.92		MAL8P1.92	MAL8P1.92
MAL8P1.91	MAL8P1.91		MAL8P1.91	MAL8P1.91	MAL8P1.91	MAL8P1.91	MAL8P1.91		MAL8P1.91		MAL8P1.91	MAL8P1.91	MAL8P1.91	MAL8P1.91	MAL8P1.91	MAL8P1.91		MAL8P1.91	MAL8P1.91		MAL8P1.91	MAL8P1.91	MAL8P1.91	MAL8P1.91
MAL8P1.90	MAL8P1.90		MAL8P1.90		MAL8P1.90						MAL8P1.90	MAL8P1.90	MAL8P1.90					MAL8P1.90	MAL8P1.90		MAL8P1.90
MAL8P1.88	MAL8P1.88		MAL8P1.88	MAL8P1.88	MAL8P1.88	MAL8P1.88	MAL8P1.88		MAL8P1.88		MAL8P1.88	MAL8P1.88	MAL8P1.88		MAL8P1.88	MAL8P1.88		MAL8P1.88	MAL8P1.88		MAL8P1.88	MAL8P1.88		MAL8P1.88
PF08_0073	PF08_0073	PF08_0073	PF08_0073	PF08_0073	PF08_0073	PF08_0073			PF08_0073		PF08_0073	PF08_0073	PF08_0073	PF08_0073	PF08_0073	PF08_0073		PF08_0073	PF08_0073		PF08_0073	PF08_0073	PF08_0073	PF08_0073
PF08_0072	PF08_0072	PF08_0072	PF08_0072	PF08_0072	PF08_0072	PF08_0072			PF08_0072		PF08_0072	PF08_0072	PF08_0072	PF08_0072	PF08_0072	PF08_0072		PF08_0072	PF08_0072		PF08_0072	PF08_0072	PF08_0072	PF08_0072
PF08_0071	PF08_0071	PF08_0071	PF08_0071	PF08_0071	PF08_0071	PF08_0071			PF08_0071		PF08_0071	PF08_0071	PF08_0071		PF08_0071	PF08_0071		PF08_0071	PF08_0071		PF08_0071	PF08_0071	PF08_0071	PF08_0071
MAL8P1.86	MAL8P1.86		MAL8P1.86	MAL8P1.86	MAL8P1.86	MAL8P1.86			MAL8P1.86		MAL8P1.86	MAL8P1.86	MAL8P1.86		MAL8P1.86			MAL8P1.86	MAL8P1.86		MAL8P1.86
PF08_0070	PF08_0070		PF08_0070	PF08_0070	PF08_0070	PF08_0070			PF08_0070		PF08_0070	PF08_0070	PF08_0070		PF08_0070			PF08_0070	PF08_0070		PF08_0070	PF08_0070
PF08_0069	PF08_0069		PF08_0069	PF08_0069	PF08_0069				PF08_0069		PF08_0069	PF08_0069			PF08_0069	PF08_0069		PF08_0069	PF08_0069		PF08_0069	PF08_0069		PF08_0069
PF08_0068	PF08_0068	PF08_0068	PF08_0068	PF08_0068	PF08_0068	PF08_0068			PF08_0068	PF08_0068	PF08_0068	PF08_0068	PF08_0068	PF08_0068	PF08_0068	PF08_0068		PF08_0068	PF08_0068	PF08_0068	PF08_0068	PF08_0068	PF08_0068	PF08_0068
MAL8P1.85	MAL8P1.85		MAL8P1.85	MAL8P1.85	MAL8P1.85	MAL8P1.85			MAL8P1.85		MAL8P1.85	MAL8P1.85	MAL8P1.85	MAL8P1.85	MAL8P1.85	MAL8P1.85		MAL8P1.85	MAL8P1.85		MAL8P1.85	MAL8P1.85	MAL8P1.85	MAL8P1.85
MAL8P1.84	MAL8P1.84		MAL8P1.84	MAL8P1.84	MAL8P1.84	MAL8P1.84			MAL8P1.84		MAL8P1.84	MAL8P1.84	MAL8P1.84	MAL8P1.84	MAL8P1.84	MAL8P1.84		MAL8P1.84	MAL8P1.84		MAL8P1.84	MAL8P1.84	MAL8P1.84	MAL8P1.84
MAL8P1.83	MAL8P1.83		MAL8P1.83		MAL8P1.83						MAL8P1.83	MAL8P1.83	MAL8P1.83		MAL8P1.83			MAL8P1.83	MAL8P1.83		MAL8P1.83	MAL8P1.83
PF08_0067	PF08_0067		PF08_0067		PF08_0067	PF08_0067					PF08_0067	PF08_0067		PF08_0067	PF08_0067	PF08_0067		PF08_0067			PF08_0067		PF08_0067	PF08_0067
MAL8P1.82	MAL8P1.82	MAL8P1.82	MAL8P1.82	MAL8P1.82	MAL8P1.82	MAL8P1.82			MAL8P1.82		MAL8P1.82	MAL8P1.82	MAL8P1.82	MAL8P1.82	MAL8P1.82	MAL8P1.82		MAL8P1.82	MAL8P1.82	MAL8P1.82	MAL8P1.82	MAL8P1.82	MAL8P1.82	MAL8P1.82
PF08_0066	PF08_0066	PF08_0066	PF08_0066	PF08_0066	PF08_0066	PF08_0066			PF08_0066	PF08_0066	PF08_0066	PF08_0066	PF08_0066	PF08_0066	PF08_0066	PF08_0066		PF08_0066	PF08_0066		PF08_0066	PF08_0066	PF08_0066	PF08_0066
PF08_0065	PF08_0065		PF08_0065	PF08_0065	PF08_0065	PF08_0065		PF08_0065	PF08_0065		PF08_0065	PF08_0065	PF08_0065					PF08_0065	PF08_0065		PF08_0065	PF08_0065		PF08_0065
MAL8P1.81	MAL8P1.81		MAL8P1.81	MAL8P1.81	MAL8P1.81	MAL8P1.81		MAL8P1.81	MAL8P1.81		MAL8P1.81	MAL8P1.81	MAL8P1.81					MAL8P1.81	MAL8P1.81		MAL8P1.81	MAL8P1.81		MAL8P1.81
PF08_0064	PF08_0064			PF08_0064	PF08_0064	PF08_0064			PF08_0064		PF08_0064	PF08_0064	PF08_0064	PF08_0064	PF08_0064	PF08_0064		PF08_0064	PF08_0064		PF08_0064	PF08_0064	PF08_0064	PF08_0064
MAL8P1.80	MAL8P1.80		MAL8P1.80	MAL8P1.80	MAL8P1.80				MAL8P1.80		MAL8P1.80	MAL8P1.80	MAL8P1.80	MAL8P1.80	MAL8P1.80	MAL8P1.80		MAL8P1.80	MAL8P1.80		MAL8P1.80	MAL8P1.80	MAL8P1.80	MAL8P1.80
MAL8P1.79	MAL8P1.79		MAL8P1.79	MAL8P1.79	MAL8P1.79				MAL8P1.79		MAL8P1.79	MAL8P1.79	MAL8P1.79	MAL8P1.79	MAL8P1.79	MAL8P1.79		MAL8P1.79	MAL8P1.79		MAL8P1.79	MAL8P1.79	MAL8P1.79	MAL8P1.79
MAL8P1.78	MAL8P1.78		MAL8P1.78	MAL8P1.78	MAL8P1.78	MAL8P1.78			MAL8P1.78	MAL8P1.78	MAL8P1.78	MAL8P1.78	MAL8P1.78	MAL8P1.78	MAL8P1.78	MAL8P1.78	MAL8P1.78	MAL8P1.78	MAL8P1.78		MAL8P1.78	MAL8P1.78	MAL8P1.78	MAL8P1.78
PF08_0063	PF08_0063		PF08_0063	PF08_0063	PF08_0063	PF08_0063	PF08_0063		PF08_0063		PF08_0063	PF08_0063	PF08_0063	PF08_0063	PF08_0063	PF08_0063		PF08_0063	PF08_0063	PF08_0063	PF08_0063	PF08_0063	PF08_0063	PF08_0063
MAL8P1.77	MAL8P1.77		MAL8P1.77	MAL8P1.77	MAL8P1.77	MAL8P1.77	MAL8P1.77		MAL8P1.77		MAL8P1.77	MAL8P1.77	MAL8P1.77	MAL8P1.77	MAL8P1.77	MAL8P1.77		MAL8P1.77	MAL8P1.77	MAL8P1.77	MAL8P1.77	MAL8P1.77	MAL8P1.77	MAL8P1.77
MAL8P1.76	MAL8P1.76		MAL8P1.76		MAL8P1.76	MAL8P1.76			MAL8P1.76	MAL8P1.76	MAL8P1.76	MAL8P1.76	MAL8P1.76	MAL8P1.76	MAL8P1.76	MAL8P1.76		MAL8P1.76	MAL8P1.76	MAL8P1.76	MAL8P1.76	MAL8P1.76	MAL8P1.76	MAL8P1.76
PF08_0062	PF08_0062		PF08_0062		PF08_0062	PF08_0062			PF08_0062	PF08_0062	PF08_0062	PF08_0062	PF08_0062	PF08_0062	PF08_0062	PF08_0062		PF08_0062	PF08_0062	PF08_0062	PF08_0062	PF08_0062	PF08_0062	PF08_0062
MAL8P1.75	MAL8P1.75		MAL8P1.75		MAL8P1.75	MAL8P1.75			MAL8P1.75		MAL8P1.75	MAL8P1.75	MAL8P1.75	MAL8P1.75	MAL8P1.75			MAL8P1.75	MAL8P1.75	MAL8P1.75	MAL8P1.75	MAL8P1.75	MAL8P1.75	MAL8P1.75
MAL8P1.75a	MAL8P1.75a		MAL8P1.75a		MAL8P1.75a	MAL8P1.75a	MAL8P1.75a				MAL8P1.75a	MAL8P1.75a	MAL8P1.75a	MAL8P1.75a	MAL8P1.75a			MAL8P1.75a	MAL8P1.75a	MAL8P1.75a	MAL8P1.75a	MAL8P1.75a	MAL8P1.75a	MAL8P1.75a
[truncated: 3,452 more rows]
